# Supplementary material
Source: publisher figshare collection journal article supplement (https://gsapubs.figshare.com/ndownloader/files/23300939)
Supplement: Supplementary file 1 [file 23300939]

## Sheet: Data Table
Quinn, G.M., Hubbard, S.M., van Drecht, R., Guest, B., Matthews, W.A., and Hadlari, T., 2016, Record of orogenic cyclicity in the Alberta foreland basin, Canadian Cordillera: Lithosphere, v. 8, doi:10.1130/L531.1.
Sample: Monteith C member		Lat 53.960349		Long -119.157691		Datum NAD83		Beam Diameter: 22 µm
Sample Details		U (ppm)1	U/Th	Final 206Pb/238U (2σ)			Final 207Pb/235U (2σ)			Error Correlation	Final 207Pb/206Pb (2σ)			Apparent Age (Ma)				Concordia Age (Internal + External Errors)				Accepted Ages2
Sample	Spot			206/238	Int. (%)3	I+E (%)4	207/235	Int. (%)3	I+E (%)4		207/206	Int. (%)3	I+E (%)4	206Pb/ 238U	207Pb/ 235U	207Pb/ 206Pb	Disc (%)5	Age (Ma)	± Ma	MSWD	Prob. Fit	Age (Ma)	2σ (Ma)	2σ (%)
UK031	UK031_60	755	1.336	0.02246	1.95904	2.19951	0.148336	10.4155	10.5111	0.188088	0.0479	10.2296	10.2784	143.184	140.442	94.3329	-51.7863	143.16	3.11226	0.164323	0.685208	143.16	3.11226	2.17398
UK031	UK031_104	171	2.078	0.0256	3.90625	4.03222	0.204724	21.0552	21.1026	0.185524	0.058	20.6897	20.7138	162.951	189.116	529.762	69.2407	162.895	6.48778	2.08436	0.148815	162.895	6.48778	3.98281
UK031	UK031_80	512	1.252	0.02622	2.51716	2.70852	0.158708	13.4495	13.5236	0.187157	0.0439	13.2118	13.2496	166.847	149.571	-116.3	243.463	166.616	4.45453	3.54648	0.0596717	166.616	4.45453	2.67353
UK031	UK031_123	221	1.962	0.02684	3.27869	3.4278	0.224632	15.9905	16.0529	0.20504	0.0607	15.6507	15.6827	170.741	205.758	628.62	72.8388	170.613	5.7749	5.53215	0.0186701	170.613	5.7749	3.3848
UK031	UK031_97	403	1.168	0.02829	2.36833	2.57079	0.18606	13.2119	13.2874	0.179257	0.0477	12.9979	13.0363	179.837	173.262	84.4158	-113.037	179.782	4.55607	0.400908	0.526621	179.782	4.55607	2.53422
UK031	UK031_116	669	3.384	0.03093	2.06919	2.29816	0.243084	10.9	10.9913	0.189835	0.057	10.7018	10.7484	196.366	220.943	491.533	60.0503	196.412	4.44455	5.13613	0.0234328	196.412	4.44455	2.26287
UK031	UK031_83	477	2.15	0.03219	2.01926	2.25331	0.239227	9.13144	9.2403	0.221133	0.0539	8.90538	8.96135	204.24	217.788	366.874	44.3296	204.331	4.52839	2.32011	0.127711	204.331	4.52839	2.21621
UK031	UK031_121	159.1	0.877	0.0489	3.27198	3.42139	0.355321	14.7878	14.8552	0.221263	0.0527	14.4213	14.4559	307.765	308.715	315.902	2.57602	307.775	10.2744	0.00242438	0.96073	307.775	10.2744	3.33828
UK031	UK031_32	364	0.844	0.0495	2.42424	2.62239	0.380838	10.6732	10.7665	0.227133	0.0558	10.3943	10.4423	311.451	327.655	444.419	29.9195	311.6	7.96851	1.19745	0.273831	311.6	7.96851	2.55729
UK031	UK031_25	578	0.6889	0.054	2.22222	2.43686	0.402058	7.37958	7.51386	0.301131	0.054	7.03704	7.10773	339.033	343.14	371.05	8.62873	339.14	8.02932	0.15367	0.695053	339.14	8.02932	2.36755
UK031	UK031_35	375	1.101	0.0582	2.23368	2.44731	0.418082	10.9782	11.0689	0.203465	0.0521	10.7486	10.795	364.669	354.679	289.801	-25.8343	364.503	8.66031	0.381592	0.536752	364.503	8.66031	2.37592
UK031	UK031_127	412	2.91	0.0582	1.71821	1.98803	0.450983	7.8418	7.9683	0.21911	0.0562	7.65125	7.71632	364.669	377.968	460.278	20.772	364.893	7.036	1.15569	0.282361	364.893	7.036	1.92824
UK031	UK031_103	548	1.688	0.0632	1.89873	2.14597	0.512384	7.06273	7.20293	0.268838	0.0588	6.80272	6.87583	395.057	420.051	559.699	29.4161	395.542	8.20922	4.26661	0.0388684	395.542	8.20922	2.07544
UK031	UK031_69	262.6	2.225	0.0635	2.04724	2.27842	0.479795	9.70738	9.80986	0.210896	0.0548	9.48905	9.5416	396.876	397.932	404.072	1.78098	396.894	8.75308	0.00445681	0.946773	396.894	8.75308	2.2054
UK031	UK031_2	301	3.44	0.0635	2.20472	2.42091	0.525323	10.729	10.8218	0.205493	0.06	10.5	10.5475	396.876	428.701	603.575	34.2458	397.143	9.31249	2.85941	0.0908409	397.143	9.31249	2.34487
UK031	UK031_11	173	1.472	0.0647	2.62751	2.81137	0.480833	12.1611	12.243	0.216059	0.0539	11.8738	11.9159	404.145	398.644	366.874	-10.1593	404.054	10.9938	0.0780795	0.779917	404.054	10.9938	2.72088
UK031	UK031_101	477	2.785	0.0662	1.66163	1.93933	0.505672	7.40895	7.54271	0.224274	0.0554	7.22022	7.28914	413.221	415.535	428.402	3.54358	413.277	7.73821	0.0337903	0.854154	413.277	7.73821	1.8724
UK031	UK031_55	118.2	1.767	0.0664	3.01205	3.17371	0.54199	13.1865	13.2621	0.22842	0.0592	12.8378	12.8767	414.43	439.736	574.459	27.8573	414.672	12.7306	1.17523	0.27833	414.672	12.7306	3.07005
UK031	UK031_8	157.4	2.75	0.0675	2.51852	2.70979	0.456969	12.4768	12.5567	0.201856	0.0491	12.22	12.2608	421.076	382.148	152.609	-175.919	420.113	11.0059	4.07592	0.0434987	420.113	11.0059	2.61976
UK031	UK031_144	385	1.929	0.0695	2.01439	2.24895	0.511714	8.66438	8.77904	0.232491	0.0534	8.42697	8.48609	433.143	419.601	345.831	-25.247	432.768	9.38684	0.856721	0.354658	432.768	9.38684	2.16902
UK031	UK031_10	715	1.632	0.0697	1.57819	1.86834	0.536251	5.08958	5.2824	0.310083	0.0558	4.83871	4.94096	434.348	435.95	444.419	2.26617	434.427	7.79709	0.0319251	0.858192	434.427	7.79709	1.7948
UK031	UK031_19	281	0.454	0.0711	1.96906	2.20844	0.516632	8.20928	8.33021	0.239857	0.0527	7.96964	8.03213	442.779	422.899	315.902	-40.1634	442.126	9.40679	2.04119	0.15309	442.126	9.40679	2.12763
UK031	UK031_125	114.8	1.188	0.0736	3.125	3.2811	0.558138	13.4587	13.5328	0.232191	0.055	13.0909	13.129	457.808	450.314	412.223	-11.0583	457.658	14.4687	0.0983037	0.753875	457.658	14.4687	3.16147
UK031	UK031_46	207.6	1.597	0.0751	2.13049	2.35351	0.621287	10.2244	10.3218	0.208373	0.06	10	10.0499	466.809	490.654	603.575	22.6593	467.129	10.584	1.43623	0.230751	467.129	10.584	2.26575
UK031	UK031_64	518	0.77	0.0811	1.60296	1.88931	0.666451	5.12301	5.31462	0.312894	0.0596	4.86577	4.96747	502.685	518.552	589.083	14.6666	503.446	9.0809	2.33183	0.126753	503.446	9.0809	1.80375
UK031	UK031_113	741.5	6.39	0.0898	1.3363	1.66904	0.750326	5.28717	5.47304	0.252744	0.0606	5.11551	5.21234	554.354	568.414	625.066	11.3127	554.981	8.80347	1.44763	0.228908	554.981	8.80347	1.58627
UK031	UK031_9	392	0.672	0.0906	1.87638	2.12622	0.749516	7.24712	7.38382	0.258914	0.06	7	7.07107	559.085	567.943	603.575	7.37108	559.392	11.334	0.320356	0.571394	559.392	11.334	2.02612
UK031	UK031_143	720	12.32	0.0907	1.4333	1.74767	0.761598	4.65942	4.86932	0.307612	0.0609	4.4335	4.54488	559.676	574.932	635.704	11.9597	560.573	9.28826	2.17976	0.139836	560.573	9.28826	1.65692
UK031	UK031_51	428	3.206	0.091	1.64835	1.92797	0.715184	5.85102	6.01951	0.28172	0.057	5.61404	5.7024	561.449	547.82	491.533	-14.2239	560.673	10.2736	1.23649	0.266148	560.673	10.2736	1.83236
UK031	UK031_44	423	0.561	0.0913	1.75246	2.0177	0.75153	5.79879	5.96874	0.302212	0.0597	5.52764	5.61736	563.221	569.112	592.719	4.97668	563.525	10.8044	0.22144	0.637945	563.525	10.8044	1.91729
UK031	UK031_61	482	2.898	0.095	1.36842	1.69487	0.744	6.48407	6.6365	0.211044	0.0568	6.33803	6.41643	585.04	564.737	483.777	-20.9319	584.169	9.40359	2.09603	0.147682	584.169	9.40359	1.60974
UK031	UK031_92	333	1.445	0.095	2	2.23607	0.74924	7.94806	8.07289	0.251634	0.0572	7.69231	7.75704	585.04	567.783	499.252	-17.1832	584.319	12.4266	1.03585	0.308789	584.319	12.4266	2.12668
UK031	UK031_110	554	1.974	0.0953	1.67891	1.95416	0.788398	5.11662	5.30847	0.328128	0.06	4.83333	4.9357	586.806	590.263	603.575	2.77819	587.036	10.8554	0.0927305	0.760734	587.036	10.8554	1.84918
UK031	UK031_73	449	2.82	0.0955	1.98953	2.22671	0.809804	6.02879	6.19244	0.330004	0.0615	5.69106	5.77825	587.983	602.344	656.767	10.4732	588.747	12.4296	1.13805	0.286065	588.747	12.4296	2.11119
UK031	UK031_63	187.9	0.353	0.0968	2.27273	2.483	0.780787	9.34055	9.447	0.243318	0.0585	9.05983	9.11485	595.628	585.932	548.538	-8.58464	595.299	14.0592	0.225951	0.634542	595.299	14.0592	2.36171
UK031	UK031_28	95.6	0.88	0.0967	2.79214	2.96581	0.890644	11.7149	11.7999	0.238342	0.0668	11.3772	11.4211	595.041	646.715	831.544	28.4415	595.768	16.8373	3.37167	0.0663263	595.768	16.8373	2.82615
UK031	UK031_108	240	1.493	0.0969	1.65119	1.93039	0.816331	7.38818	7.52232	0.22349	0.0611	7.20131	7.27041	596.216	605.999	642.756	7.24072	596.521	10.9421	0.335584	0.562389	596.521	10.9421	1.83432
UK031	UK031_147	711	2.58	0.0979	3.26864	3.41819	0.809907	12.2765	12.3577	0.266252	0.06	11.8333	11.8755	602.09	602.402	603.575	0.24591	602.1	19.5752	0.000131536	0.990849	602.1	19.5752	3.25116
UK031	UK031_36	198	0.651	0.0983	2.13632	2.35878	0.803729	11.002	11.0925	0.194176	0.0593	10.7926	10.8388	604.439	598.93	578.128	-4.55104	604.317	13.5663	0.0500319	0.823008	604.317	13.5663	2.2449
UK031	UK031_138	135.1	1.394	0.0999	2.5025	2.69491	0.862266	9.59719	9.70082	0.260754	0.0626	9.26518	9.31898	613.823	631.359	694.67	11.6382	614.332	15.7244	0.619464	0.431246	614.332	15.7244	2.5596
UK031	UK031_14	154.9	3.848	0.1009	2.37859	2.58025	0.870897	8.33387	8.45301	0.285413	0.0626	7.98722	8.04958	619.681	636.054	694.67	10.7949	620.285	15.1763	0.713329	0.398341	620.285	15.1763	2.44667
UK031	UK031_3	229.4	1.056	0.1018	2.35756	2.56088	0.786026	7.35251	7.48728	0.320648	0.056	6.96429	7.03571	624.949	588.915	452.368	-38.1504	622.21	15.07	5.22545	0.0222587	622.21	15.07	2.42201
UK031	UK031_132	53.9	6.45	0.102	3.82353	3.95214	0.886017	16.327	16.3882	0.234184	0.063	15.873	15.9045	626.119	644.227	708.231	11.5939	626.474	23.5319	0.22217	0.637392	626.474	23.5319	3.75624
UK031	UK031_20	310	1.155	0.1048	1.71756	1.98746	0.920454	6.51009	6.66193	0.26383	0.0637	6.27943	6.35856	642.478	662.6	731.685	12.192	643.302	12.0818	1.6051	0.205181	643.302	12.0818	1.8781
UK031	UK031_59	35.5	0.993	0.1056	4.64015	4.74668	0.902728	21.475	21.5216	0.216072	0.062	20.9677	20.9916	647.144	653.184	674.109	4.00009	647.258	29.1629	0.0140982	0.905485	647.258	29.1629	4.50561
UK031	UK031_52	62.2	0.686	0.1067	3.28022	3.42927	0.854755	16.5082	16.5686	0.198703	0.0581	16.179	16.2099	653.554	627.256	533.535	-22.4951	652.924	21.239	0.488224	0.48472	652.924	21.239	3.25291
UK031	UK031_107	102.4	1.127	0.1079	3.15107	3.30594	0.901561	13.0912	13.1673	0.240702	0.0606	12.7063	12.7456	660.54	652.562	625.066	-5.67525	660.294	20.6691	0.0672323	0.79541	660.294	20.6691	3.13029
UK031	UK031_53	135.9	2	0.1189	2.77544	2.9501	1.06561	9.78642	9.88808	0.283601	0.065	9.38462	9.43774	724.229	736.583	774.336	6.47099	724.755	20.094	0.241719	0.622967	724.755	20.094	2.77252
UK031	UK031_95	76.2	0.558	0.1235	4.2915	4.40647	1.26009	16.7745	16.834	0.255835	0.074	16.2162	16.247	750.677	827.946	1041.47	27.9212	751.929	31.1803	2.6024	0.106702	751.929	31.1803	4.14671
UK031	UK031_135	261.6	1.44	0.144	1.73611	2.00352	1.34019	6.88901	7.03268	0.252012	0.0675	6.66667	6.74125	867.242	863.313	853.24	-1.64107	867.002	16.0735	0.0386865	0.844071	867.002	16.0735	1.85392
UK031	UK031_86	740	4.14	0.1466	1.43247	1.74699	1.40886	4.26497	4.49333	0.335868	0.0697	4.01722	4.13981	881.876	892.678	919.528	4.09471	883.119	14.0865	0.699956	0.402799	883.119	14.0865	1.59509
UK031	UK031_7	129	1.483	0.1509	1.9218	2.16641	1.48347	6.73176	6.87871	0.285483	0.0713	6.45161	6.52865	906.006	923.652	966.027	6.21311	907.201	18.098	0.748211	0.387043	907.201	18.098	1.99492
UK031	UK031_129	224	0.615	0.1619	1.72946	1.99776	1.50679	6.88734	7.03104	0.251107	0.0675	6.66667	6.74125	967.327	933.139	853.24	-13.3711	964.621	17.6484	2.7082	0.0998337	964.621	17.6484	1.82957
UK031	UK031_13	472	8.53	0.1643	1.21729	1.57537	1.64013	4.45144	4.67069	0.273459	0.0724	4.28177	4.39699	980.629	985.761	997.206	1.66238	981.17	13.9977	0.124563	0.724137	981.17	13.9977	1.42663
UK031	UK031_134	1010	5.097	0.1687	1.36337	1.69079	1.6887	3.19776	3.49652	0.42635	0.0726	2.89256	3.06054	1004.94	1004.27	1002.81	-0.213005	1004.8	15.0319	0.00404676	0.949277	1004.8	15.0319	1.49602
UK031	UK031_105	175.9	3.29	0.1688	2.8436	3.01431	1.83866	8.4665	8.5838	0.335865	0.079	7.97468	8.03714	1005.5	1059.38	1172.13	14.2167	1009.44	27.7537	3.81619	0.0507594	1009.44	27.7537	2.74941
UK031	UK031_26	209	4.45	0.1739	2.24267	2.45552	1.70719	6.31081	6.46733	0.355369	0.0712	5.89888	5.98304	1033.56	1011.23	963.161	-7.30953	1030.49	22.8255	1.28813	0.256393	1030.49	22.8255	2.21502
UK031	UK031_128	1116	4.49	0.1748	1.02975	1.4354	1.78833	3.13869	3.44258	0.328082	0.0742	2.96496	3.12906	1038.5	1041.22	1046.91	0.803158	1038.99	13.1815	0.0599689	0.806545	1038.99	13.1815	1.26868
UK031	UK031_96	356	3.58	0.1778	2.24972	2.46196	1.84353	5.16946	5.35941	0.435194	0.0752	4.65426	4.76047	1054.94	1061.12	1073.85	1.76071	1056.1	23.1433	0.140434	0.70785	1056.1	23.1433	2.19139
UK031	UK031_76	156	4.47	0.1787	2.01455	2.24909	1.90214	7.15476	7.29319	0.281568	0.0772	6.86528	6.93773	1059.87	1081.84	1126.36	5.90326	1061.55	21.6677	0.847024	0.357395	1061.55	21.6677	2.04113
UK031	UK031_45	64.7	2.76	0.1789	2.68306	2.86336	1.90427	10.0787	10.1775	0.266211	0.0772	9.71503	9.76636	1060.96	1082.58	1126.36	5.80616	1062.26	27.7189	0.420432	0.516721	1062.26	27.7189	2.60944
UK031	UK031_15	268	6.15	0.186	1.55914	1.85227	2.00293	5.72227	5.89443	0.272469	0.0781	5.50576	5.59584	1099.67	1116.5	1149.42	4.32812	1101.21	18.3689	0.727477	0.393702	1101.21	18.3689	1.66806
UK031	UK031_24	595	2.2	0.186	1.72043	1.98994	2.0337	4.61981	4.83143	0.372403	0.0793	4.28752	4.40259	1099.67	1126.86	1179.63	6.77865	1103.72	19.5386	2.91951	0.0875146	1103.72	19.5386	1.77024
UK031	UK031_57	88.7	2.649	0.1905	2.4147	2.61357	2.04876	7.94018	8.06514	0.304111	0.078	7.5641	7.62992	1124.08	1131.88	1146.87	1.98716	1124.82	26.4762	0.0847598	0.770948	1124.82	26.4762	2.35382
UK031	UK031_106	376	1.088	0.1916	1.25261	1.60282	2.05266	4.55156	4.7662	0.275204	0.0777	4.3758	4.48861	1130.04	1133.18	1139.21	0.805501	1130.42	16.1418	0.0380604	0.845322	1130.42	16.1418	1.42795
UK031	UK031_33	193	2.135	0.192	1.5625	1.8551	2.02783	5.70132	5.8741	0.27406	0.0766	5.48303	5.57347	1132.2	1124.89	1110.8	-1.92702	1131.43	18.8158	0.139243	0.709035	1131.43	18.8158	1.66301
UK031	UK031_29	56.4	2.083	0.1932	3.46791	3.60921	2.32287	10.4543	10.5496	0.33172	0.0872	9.86239	9.91295	1138.69	1219.3	1364.92	16.5747	1144.49	37.2578	4.71874	0.0298357	1144.49	37.2578	3.25541
UK031	UK031_90	896	4.365	0.1949	1.02617	1.43284	2.10952	2.98451	3.30262	0.343831	0.0785	2.80255	2.97561	1147.86	1151.92	1159.56	1.00826	1148.73	14.276	0.128876	0.7196	1148.73	14.276	1.24277
UK031	UK031_126	239	2.683	0.1979	1.71804	1.98788	2.18564	4.46372	4.6824	0.384889	0.0801	4.11985	4.23948	1164.03	1176.48	1199.45	2.95318	1166.28	20.3852	0.62706	0.428436	1166.28	20.3852	1.74788
UK031	UK031_4	128	1.407	0.1989	1.7094	1.98042	2.20492	6.81007	6.95536	0.251011	0.0804	6.59204	6.66746	1169.41	1182.6	1206.82	3.0998	1170.47	20.821	0.300411	0.583625	1170.47	20.821	1.77886
UK031	UK031_23	153.8	1.56	0.2011	2.33715	2.5421	2.17939	6.06626	6.22892	0.38527	0.0786	5.59796	5.68658	1181.23	1174.48	1162.08	-1.64763	1180.05	26.479	0.10646	0.744211	1180.05	26.479	2.24388
UK031	UK031_93	367	2.548	0.214	1.26168	1.60992	2.44607	4.17586	4.40883	0.302137	0.0829	3.9807	4.10438	1250.09	1256.27	1266.86	1.32369	1251.07	17.5965	0.152922	0.695759	1251.07	17.5965	1.40652
UK031	UK031_67	181	2.193	0.2235	1.43177	1.74641	2.72107	5.51197	5.6905	0.259756	0.0883	5.32276	5.41588	1300.34	1334.22	1389.02	6.38415	1303.87	20.0745	2.54566	0.110598	1303.87	20.0745	1.53961
UK031	UK031_100	638	3.33	0.2303	1.47634	1.78313	2.74035	4.97497	5.17207	0.296753	0.0863	4.75087	4.85497	1336.07	1339.47	1344.91	0.657262	1336.58	20.7551	0.0317866	0.858497	1336.58	20.7551	1.55286
UK031	UK031_66	116	0.925	0.2314	2.37684	2.57863	2.94806	8.76979	8.88309	0.271025	0.0924	8.44156	8.50058	1341.83	1394.35	1475.62	9.06654	1346.08	30.7357	2.41751	0.119985	1346.08	30.7357	2.28335
UK031	UK031_17	300	1.73	0.2347	1.87473	2.12477	2.9448	4.18023	4.41297	0.448477	0.091	3.73626	3.86777	1359.08	1393.51	1446.6	6.04988	1368.21	24.5669	4.58666	0.0322217	1368.21	24.5669	1.79556
UK031	UK031_99	214	2.468	0.2398	1.70976	1.98073	3.02863	4.79142	4.99577	0.356838	0.0916	4.47598	4.58633	1385.66	1414.86	1459.11	5.03387	1391.07	23.6699	2.4054	0.120917	1391.07	23.6699	1.70157
UK031	UK031_16	241	2.11	0.2455	2.32179	2.52799	3.12093	6.80732	6.95267	0.341073	0.0922	6.39913	6.4768	1415.23	1437.86	1471.51	3.82477	1418.76	31.0405	0.742094	0.388991	1418.76	31.0405	2.18786
UK031	UK031_1	173.4	1.565	0.2462	2.8026	2.97566	3.4625	10.1966	10.2942	0.274855	0.102	9.80392	9.85479	1418.85	1518.72	1660.83	14.57	1425.94	37.3959	5.80986	0.0159365	1425.94	37.3959	2.62255
UK031	UK031_115	119	2.717	0.25	1.76	2.02425	3.09196	5.95179	6.1175	0.295709	0.0897	5.68562	5.77289	1438.48	1430.7	1419.15	-1.36176	1437.31	25.1595	0.112637	0.737162	1437.31	25.1595	1.75046
UK031	UK031_41	184	2.744	0.26	1.84615	2.09959	3.47375	4.80627	5.01002	0.384113	0.0969	4.43756	4.54884	1489.84	1521.27	1565.28	4.81965	1496.91	26.4867	2.60015	0.106854	1496.91	26.4867	1.76943
UK031	UK031_31	79.7	2.502	0.265	2.75472	2.93061	3.49305	7.14255	7.28121	0.385677	0.0956	6.58996	6.6654	1515.37	1525.65	1539.92	1.59433	1517.6	37.6568	0.134694	0.713614	1517.6	37.6568	2.48134
UK031	UK031_120	449	1.439	0.2734	1.31675	1.65343	3.61508	3.10813	3.41475	0.423647	0.0959	2.81543	2.98775	1558.04	1552.86	1545.81	-0.790721	1556.19	20.7501	0.146441	0.701959	1556.19	20.7501	1.3334
UK031	UK031_6	351	0.718	0.2793	1.39635	1.71749	3.77782	3.36181	3.64716	0.415356	0.0981	3.0581	3.21745	1587.84	1588.04	1588.32	0.0303647	1587.91	22.0366	0.000201112	0.988685	1587.91	22.0366	1.38778
UK031	UK031_48	391	3.466	0.2805	1.28342	1.62701	3.96422	3.4659	3.74332	0.3703	0.1025	3.21951	3.37124	1593.88	1626.9	1669.88	4.55117	1602.95	21.3305	4.60141	0.0319457	1602.95	21.3305	1.3307
UK031	UK031_149	318	3.07	0.2831	1.34228	1.67383	3.89948	3.47307	3.74996	0.386483	0.0999	3.2032	3.35567	1606.96	1613.57	1622.22	0.941058	1608.99	21.875	0.188361	0.664284	1608.99	21.875	1.35955
UK031	UK031_5	45.1	0.796	0.2847	2.95047	3.11533	4.26696	9.31146	9.41824	0.316865	0.1087	8.83165	8.88808	1614.99	1687.01	1777.74	9.15508	1624.35	43.2667	3.39762	0.0652904	1624.35	43.2667	2.66363
UK031	UK031_145	190.8	1.159	0.2943	1.56303	1.85555	4.12273	4.51168	4.72814	0.346441	0.1016	4.23228	4.34882	1662.98	1658.82	1653.55	-0.570179	1661.94	25.3989	0.046166	0.829874	1661.94	25.3989	1.52827
UK031	UK031_74	44.4	1.044	0.2958	2.77214	2.94699	4.00916	9.56612	9.67009	0.289788	0.0983	9.15565	9.2101	1670.45	1636.05	1592.12	-4.91952	1665.04	41.6747	0.797214	0.371928	1665.04	41.6747	2.50293
UK031	UK031_114	378	0.891	0.2944	1.52853	1.82658	4.24997	3.41726	3.69834	0.447297	0.1047	3.05635	3.21579	1663.48	1683.73	1709.05	2.66651	1671.1	24.1943	1.78384	0.181678	1671.1	24.1943	1.4478
UK031	UK031_117	289	1.03	0.2974	1.74849	2.01425	4.17026	3.34491	3.63158	0.522731	0.1017	2.85152	3.02179	1678.4	1668.2	1655.38	-1.39104	1673.24	25.9072	0.494157	0.482079	1673.24	25.9072	1.54833
UK031	UK031_136	111.3	2.243	0.3037	2.23905	2.45221	4.41354	5.4179	5.59943	0.413269	0.1054	4.93359	5.03391	1709.63	1714.88	1721.3	0.678159	1711.25	34.0008	0.0525856	0.818624	1711.25	34.0008	1.9869
UK031	UK031_112	27.1	0.645	0.306	3.26797	3.41755	4.51447	9.90068	10.0012	0.330076	0.107	9.34579	9.39914	1720.99	1733.64	1748.94	1.59767	1723.28	49.4085	0.0940971	0.759032	1723.28	49.4085	2.86713
UK031	UK031_62	288	1.789	0.315	1.26984	1.61632	4.66896	3.32204	3.61054	0.382247	0.1075	3.06977	3.22854	1765.26	1761.7	1757.47	-0.443736	1764.01	22.4782	0.0532306	0.817534	1764.01	22.4782	1.27427
UK031	UK031_38	186	2.451	0.3275	1.58779	1.87645	4.98067	3.87596	4.1259	0.40965	0.1103	3.53581	3.6745	1826.25	1816.05	1804.36	-1.21352	1822.43	26.7603	0.333333	0.563703	1822.43	26.7603	1.46839
UK031	UK031_118	329	2.049	0.3289	1.3986	1.71933	5.03824	2.88232	3.21057	0.485235	0.1111	2.52025	2.7114	1833.05	1825.77	1817.49	-0.856175	1829.33	23.5033	0.275886	0.59941	1829.33	23.5033	1.28481
UK031	UK031_21	97.7	3.31	0.3293	1.76131	2.02539	5.07161	5.06121	5.25508	0.348002	0.1117	4.74485	4.84908	1834.99	1831.37	1827.26	-0.422977	1834.01	29.9835	0.0258515	0.872264	1834.01	29.9835	1.63486
UK031	UK031_54	367	0.872	0.3335	0.929535	1.3653	5.26505	2.86255	3.19283	0.324723	0.1145	2.70742	2.8862	1855.32	1863.21	1872.03	0.892421	1858.03	19.6307	0.296511	0.586078	1858.03	19.6307	1.05653
UK031	UK031_43	171.4	1.309	0.3332	1.62065	1.90434	5.37976	4.40781	4.62913	0.367676	0.1171	4.09906	4.21928	1853.87	1881.64	1912.43	3.06169	1862.02	28.2513	1.88097	0.170224	1862.02	28.2513	1.51724
UK031	UK031_88	118.8	0.92	0.3385	1.65436	1.93311	5.1573	5.15931	5.34962	0.320655	0.1105	4.88688	4.98814	1879.45	1845.6	1807.65	-3.97197	1870.59	29.1786	2.1773	0.14006	1870.59	29.1786	1.55986
UK031	UK031_47	118.6	1.25	0.3412	2.02227	2.25601	5.44307	5.48575	5.66511	0.368642	0.1157	5.09939	5.19652	1892.44	1891.66	1890.81	-0.0861379	1892.21	34.0766	0.00100346	0.974729	1892.21	34.0766	1.80089
UK031	UK031_18	209	1.181	0.3423	1.57756	1.86781	5.78155	3.99788	4.24065	0.3946	0.1225	3.67347	3.80715	1897.72	1943.65	1992.95	4.7783	1913.07	27.9156	5.91223	0.0150361	1913.07	27.9156	1.4592
UK031	UK031_148	234	1.15	0.349	1.46132	1.77072	5.70223	3.4474	3.7262	0.423889	0.1185	3.12236	3.27859	1929.82	1931.71	1933.73	0.202053	1930.62	25.9414	0.0128812	0.909638	1930.62	25.9414	1.34368
UK031	UK031_68	173.1	0.6055	0.3621	1.62938	1.91178	6.23081	3.24346	3.53837	0.50236	0.1248	2.80449	2.97744	1992.12	2008.78	2025.96	1.67038	2001.27	27.6539	1.094	0.295586	2001.27	27.6539	1.38182
UK031	UK031_146	152.8	1.177	0.366	3.82514	3.95369	6.86311	8.28839	8.40818	0.461505	0.136	7.35294	7.42063	2010.55	2093.91	2176.87	7.64039	2041.85	61.8236	4.89737	0.0268977	2041.85	61.8236	3.02782
UK031	UK031_30	73.1	1.257	0.372	2.25806	2.46959	6.74481	4.61986	4.83147	0.488773	0.1315	4.03042	4.15262	2038.8	2078.51	2118.09	3.74338	2058.28	37.3625	3.31713	0.0685616	2058.28	37.3625	1.81523
UK031	UK031_22	161	1.154	0.376	2.92553	3.09172	6.97805	7.16259	7.30087	0.408446	0.1346	6.53789	6.61393	2057.57	2108.64	2158.84	4.69077	2074.48	49.7196	2.38422	0.122566	2074.48	49.7196	2.39673
UK031	UK031_131	341	0.897	0.3822	1.90999	2.15594	6.68734	4.02777	4.26883	0.474207	0.1269	3.5461	3.6844	2086.55	2070.95	2055.46	-1.51243	2078.36	32.572	0.640607	0.423491	2078.36	32.572	1.5672
UK031	UK031_142	262.2	0.7146	0.3779	1.42895	1.7441	6.97163	3.38108	3.66493	0.422632	0.1338	3.06428	3.22332	2066.47	2107.82	2148.43	3.81508	2084.43	26.9154	5.82238	0.0158235	2084.43	26.9154	1.29126
UK031	UK031_85	75.5	1.869	0.51	3.33333	3.4801	12.5308	6.23991	6.39816	0.534196	0.1782	5.27497	5.36892	2656.63	2645.04	2636.19	-0.775371	2648.06	57.4033	0.119586	0.729484	2648.06	57.4033	2.16775
UK031	UK031_40	191	1.201	0.5145	1.4966	1.79995	13.2869	2.96773	3.28746	0.504291	0.1873	2.56273	2.75093	2675.81	2700.25	2718.6	1.57379	2693.47	29.6185	1.86237	0.172352	2693.47	29.6185	1.09964
UK031	UK031_75	110.6	2.465	0.5361	1.54822	1.84309	14.4952	3.38365	3.6673	0.457559	0.1961	3.00867	3.1705	2767.1	2782.69	2794.01	0.963035	2777.26	32.0934	0.602737	0.437536	2777.26	32.0934	1.15558
UK031	UK031_79	117.1	0.867	0.5386	1.7267	1.99537	14.8302	3.04143	3.35414	0.567726	0.1997	2.50376	2.69607	2777.59	2804.4	2823.75	1.63474	2800.41	31.5383	2.03923	0.153287	2800.41	31.5383	1.1262
UK031	UK031_98	517	7.75	0.5794	1.36348	1.69088	17.759	2.32995	2.72556	0.585196	0.2223	1.88934	2.13766	2946.3	2976.77	2997.42	1.70557	2974.53	26.148	3.52025	0.0606233	2974.53	26.148	0.879063
UK031	UK031_77	114.2	1.556	0.635	1.73228	2.0002	21.8622	3.19382	3.49292	0.542386	0.2497	2.68322	2.86351	3169.33	3177.63	3182.87	0.425153	3176.57	33.5122	0.151606	0.697005	3176.57	33.5122	1.05498
UK031	UK031_12	449	0.867	0.07	2	2.23607	0.60419	7.92427	8.04948	0.252389	0.0626	7.66773	7.73267	436.156	479.889	694.67	37.214	436.731	9.42076	8.24566	0.00408496
UK031	UK031_27	81.4	0.594	0.576	1.90972	2.1557	20.0533	3.11067	3.41705	0.613927	0.2525	2.45545	2.65127	2932.41	3093.93	3200.51	8.37679	3083.88	33.2845	66.2424	3.98745e-16
UK031	UK031_34	342	1.926	0.3133	1.50016	1.80291	4.93751	3.3315	3.61924	0.450296	0.1143	2.97463	3.13822	1756.93	1808.69	1868.88	5.99029	1776.9	24.9433	11.2143	0.000811696
UK031	UK031_37	179	2.268	0.3173	1.44973	1.76117	5.1493	3.77307	4.0294	0.384232	0.1177	3.48343	3.62413	1776.53	1844.28	1921.59	7.54912	1796.29	25.2608	14.8119	0.000118782
UK031	UK031_39	386	4	0.063	2.85714	3.02709	0.594152	10.2035	10.301	0.280016	0.0684	9.79532	9.84623	393.844	473.516	880.699	55.2805	393.702	11.5652	16.7688	4.22223e-05
UK031	UK031_42	247.3	2.73	0.0745	2.01342	2.24808	0.68001	8.54865	8.66483	0.235525	0.0662	8.30816	8.36812	463.21	526.781	812.706	43.004	463.755	10.0425	12.6684	0.000371881
UK031	UK031_49	276	1.886	0.1537	2.14704	2.3685	1.71868	5.04223	5.2368	0.425812	0.0811	4.56227	4.67058	921.671	1015.53	1223.87	24.692	930.092	20.1088	34.0758	5.30063e-09
UK031	UK031_50	809	1.868	0.2063	1.16335	1.53408	2.63682	2.74032	3.08372	0.424532	0.0927	2.48112	2.67506	1209.08	1310.97	1481.77	18.4031	1230.33	16.1959	82.4362	1.09135e-19
UK031	UK031_56	526	3.892	0.1899	1.1585	1.5304	2.10776	2.85437	3.1855	0.405871	0.0805	2.6087	2.7938	1120.83	1151.35	1209.26	7.31283	1127.73	14.9695	8.15554	0.00429299
UK031	UK031_58	155.8	3.082	0.3165	1.70616	1.97762	5.56398	4.13328	4.36852	0.412786	0.1275	3.76471	3.89525	1772.61	1910.54	2063.79	14.1087	1808.79	28.7494	50.8578	9.93064e-13
UK031	UK031_65	426	1.152	0.2251	2.53221	2.72251	3.63751	3.66174	3.92535	0.69153	0.1172	2.64505	2.82777	1308.77	1557.78	1913.96	31.6199	1376.26	31.1368	369.247	2.73036e-82
UK031	UK031_70	388	18.59	0.4912	1.32329	1.65864	12.7529	2.36899	2.75901	0.558588	0.1883	1.96495	2.20477	2575.87	2661.57	2727.37	5.55497	2643.92	25.6975	33.0779	8.85391e-09
UK031	UK031_71	199.7	1.101	0.3108	1.73745	2.00468	5.03095	4.05389	4.29349	0.428588	0.1174	3.66269	3.79675	1744.64	1824.55	1917.02	8.9918	1769.64	28.2839	18.9045	1.37428e-05
UK031	UK031_72	161	1.249	0.278	1.54676	1.84187	3.98255	4.32817	4.55336	0.357371	0.1039	4.04235	4.1642	1581.28	1630.65	1694.93	6.70493	1592.19	24.4367	7.01606	0.00807819
UK031	UK031_78	389	1.812	0.2821	1.31159	1.64932	4.11908	3.29409	3.58484	0.398165	0.1059	3.02172	3.18289	1601.93	1658.1	1729.99	7.40255	1618.38	21.657	14.3066	0.000155315
UK031	UK031_81	1100	7.35	0.1505	1.52824	1.82634	1.53142	3.11123	3.41757	0.491201	0.0738	2.71003	2.88864	903.766	943.068	1036	12.7642	911.446	14.9181	16.7414	4.28353e-05
UK031	UK031_82	791	2.53	0.3568	1.23318	1.58768	6.59713	2.75255	3.0946	0.448015	0.1341	2.46085	2.65627	1966.99	2058.96	2152.34	8.61174	2007.77	23.5199	40.7877	1.69697e-10
UK031	UK031_84	1109	1.865	0.3112	2.05656	2.28679	5.02456	3.84188	4.0939	0.535299	0.1171	3.24509	3.39567	1746.61	1823.47	1912.43	8.67048	1782.44	31.0285	20.6049	5.64526e-06
UK031	UK031_87	767	66	0.0682	1.6129	1.89775	0.630969	5.74521	5.9167	0.280739	0.0671	5.51416	5.6041	425.302	496.699	840.879	49.4217	426.124	7.80516	38.1656	6.49864e-10
UK031	UK031_89	81	7.62	0.572	1.92308	2.16754	15.5211	3.86591	4.11646	0.497445	0.1968	3.35366	3.49958	2916.03	2847.78	2799.84	-4.14976	2864.06	37.0573	8.68613	0.00320641
UK031	UK031_91	443	0.709	0.419	1.90931	2.15533	9.22037	3.885	4.1344	0.491456	0.1596	3.38346	3.52814	2255.94	2360.14	2451.43	7.9745	2311.15	34.7125	26.8905	2.15317e-07
UK031	UK031_94	593	1.003	0.3434	1.22306	1.57984	5.8096	2.6612	3.01363	0.459592	0.1227	2.36349	2.56634	1903.01	1947.84	1995.85	4.65207	1924.36	22.4836	10.8387	0.000993988
UK031	UK031_102	162	0.798	0.3351	1.67114	1.94749	5.85861	3.99417	4.23714	0.418396	0.1268	3.62776	3.76306	1863.05	1955.13	2054.07	9.29956	1892.92	28.885	23.7759	1.08232e-06
UK031	UK031_109	69.6	1.343	0.1627	2.82729	2.99893	1.83951	10.0404	10.1395	0.28159	0.082	9.63415	9.68591	971.764	1059.69	1245.52	21.979	975.124	26.9163	6.86612	0.0087845
UK031	UK031_111	503	3.836	0.3168	2.1149	2.3394	5.38579	3.53984	3.81189	0.597456	0.1233	2.83861	3.0096	1774.08	1882.6	2004.52	11.4958	1835.8	31.2752	48.1813	3.88583e-12
UK031	UK031_119	231	1.638	0.0922	2.1692	2.3886	0.874622	7.86326	7.98942	0.275865	0.0688	7.55814	7.62401	568.535	638.074	892.749	36.3164	569.66	12.9819	13.6228	0.000223461
UK031	UK031_122	383	1.612	0.3138	1.72084	1.9903	5.91024	3.02597	3.34014	0.56869	0.1366	2.48902	2.68239	1759.38	1962.74	2184.53	19.4621	1847.26	27.6761	206.061	9.93757e-47
UK031	UK031_124	185	1.558	0.6901	1.05782	1.45567	28.4406	1.83999	2.32068	0.574904	0.2989	1.50552	1.80737	3383	3434.41	3464.53	2.35337	3433.28	22.7784	10.8319	0.000997662
UK031	UK031_130	99.5	1.237	0.1794	2.78707	2.96104	2.18169	7.35151	7.4863	0.379115	0.0882	6.80272	6.87583	1063.7	1175.22	1386.84	23.301	1072.03	28.743	18.8529	1.41199e-05
UK031	UK031_133	455	8.26	0.3107	2.54265	2.73222	4.92224	4.38155	4.60412	0.580308	0.1149	3.56832	3.70579	1744.15	1806.08	1878.32	7.1429	1778.25	36.1679	11.1031	0.000861845
UK031	UK031_137	510	23.62	0.1334	1.57421	1.86498	1.50088	4.11226	4.34864	0.38281	0.0816	3.79902	3.92843	807.233	930.745	1235.93	34.6864	813.904	14.0651	89.3945	3.23431e-21
UK031	UK031_139	48.8	0.726	0.2985	2.94807	3.11306	4.79481	8.75182	8.86535	0.336853	0.1165	8.24034	8.3008	1683.87	1783.99	1903.2	11.5245	1698.38	44.7014	6.98498	0.00821964
UK031	UK031_140	287	3.813	0.2801	1.17815	1.54533	4.11691	3.40013	3.68251	0.346501	0.1066	3.18949	3.34258	1591.87	1657.66	1742.08	8.62242	1607.69	20.4318	18.057	2.14384e-05
UK031	UK031_141	246.1	2.337	0.273	1.4652	1.77393	3.98244	3.7047	3.96545	0.395498	0.1058	3.40265	3.54655	1556.01	1630.62	1728.26	9.96654	1574.73	23.0631	21.1548	4.23644e-06
UK031	UK031_150	692	1.752	0.3294	1.70006	1.97236	5.84525	2.46656	2.84323	0.689242	0.1287	1.7871	2.04786	1835.47	1953.15	2080.29	11.7684	1931.92	24.8245	105.629	8.891e-25
Sample: Monteith B member		Lat 53.965273		Long -119.154558		Datum NAD83		Beam Diameter: 22 µm
Sample Details		U (ppm)1	U/Th	Final 206Pb/238U (2σ)			Final 207Pb/235U (2σ)			Error Correlation	Final 207Pb/206Pb (2σ)			Apparent Age (Ma)				Concordia Age (Internal + External Errors)				Accepted Ages2
Sample	Spot			206/238	Int. (%)3	I+E (%)4	207/235	Int. (%)3	I+E (%)4		207/206	Int. (%)3	I+E (%)4	206Pb/ 238U	207Pb/ 235U	207Pb/ 206Pb	Disc (%)5	Age (Ma)	± Ma	MSWD	Prob. Fit	Age (Ma)	2σ (Ma)	2σ (%)
UK032	UK032_150	1631	3.51	0.02019	2.62506	2.80908	0.146428	10.0449	10.144	0.261333	0.0526	9.69582	9.74725	128.857	138.753	311.581	58.6443	128.881	3.5836	2.40566	0.120897	128.881	3.58412	2.78095
UK032	UK032_110	584	0.651	0.02211	2.53279	2.72305	0.148158	12.4013	12.4817	0.204236	0.0486	12.1399	12.181	140.977	140.285	128.579	-9.64301	140.973	3.79566	0.00748992	0.931034	140.973	3.79624	2.69289
UK032	UK032_114	567	1.281	0.02622	2.5553	2.74401	0.20426	11.0947	11.1845	0.230317	0.0565	10.7965	10.8427	166.847	188.724	472.071	64.6563	166.843	4.51955	5.33273	0.0209286	166.843	4.52023	2.70927
UK032	UK032_88	341	1.908	0.03276	2.6862	2.8663	0.249787	10.4768	10.5718	0.256395	0.0553	10.1266	10.1758	207.799	226.403	424.372	51.0338	207.863	5.86067	3.16068	0.0754319	207.863	5.86148	2.81988
UK032	UK032_68	634	125	0.04	3.25	3.40037	0.28679	14.7847	14.8522	0.219822	0.052	14.4231	14.4577	252.833	256.03	285.41	11.4141	252.858	8.42676	0.0378706	0.845703	252.858	8.42758	3.33292
UK032	UK032_90	2029	1.363	0.0448	4.24107	4.35737	0.347149	9.3769	9.48295	0.452289	0.0562	8.36299	8.42256	282.517	302.574	460.278	38.6204	282.805	12.0397	3.21941	0.0727701	282.805	12.0404	4.25749
UK032	UK032_15	216	3.103	0.047	2.76596	2.94118	0.347995	11.6913	11.7765	0.236582	0.0537	11.3594	11.4033	296.077	303.212	358.489	17.4099	296.154	8.50486	0.224465	0.635659	296.154	8.50596	2.87214
UK032	UK032_101	439	0.769	0.0477	2.51572	2.70719	0.385405	11.2075	11.2964	0.224468	0.0586	10.9215	10.9672	300.385	331.007	552.267	45.6087	300.521	7.94404	3.7632	0.0523923	300.521	7.94526	2.64383
UK032	UK032_22	583	1.209	0.0519	2.50482	2.69706	0.387138	10.1118	10.2102	0.247712	0.0541	9.79667	9.84758	326.176	332.277	375.215	13.0695	326.266	8.56809	0.187873	0.664692	326.266	8.56942	2.62651
UK032	UK032_58	780	1.712	0.0559	2.32558	2.53147	0.420829	6.99152	7.13312	0.332629	0.0546	6.59341	6.66881	350.643	356.644	395.88	11.4269	350.826	8.61685	0.348057	0.555215	350.826	8.61836	2.45659
UK032	UK032_14	464	1.62	0.05856	1.62227	1.90572	0.437625	7.19631	7.33395	0.225431	0.0542	7.01107	7.08203	366.862	368.576	379.369	3.29673	366.902	6.77664	0.0239105	0.877113	366.902	6.77872	1.84756
UK032	UK032_81	96.4	0.709	0.0598	3.01003	3.1718	0.53594	17.1887	17.2468	0.175117	0.065	16.9231	16.9526	374.409	435.744	774.336	51.6478	374.44	11.5371	3.91504	0.0478559	374.44	11.5384	3.08152
UK032	UK032_106	567	29	0.0613	2.12072	2.34466	0.507123	8.59895	8.71446	0.246625	0.06	8.33333	8.39312	383.527	416.512	603.575	36.4575	383.904	8.72316	5.05342	0.0245774	383.904	8.72495	2.27269
UK032	UK032_18	182.3	4.82	0.0618	2.75081	2.92694	0.469506	11.5836	11.6696	0.237474	0.0551	11.2523	11.2966	386.563	390.848	416.283	7.1394	386.63	10.9664	0.0539227	0.816373	386.63	10.9679	2.83678
UK032	UK032_79	617	12.6	0.0629	2.7027	2.88177	0.485669	11.9176	12.0013	0.226782	0.056	11.6071	11.6501	393.238	401.954	452.368	13.0713	393.356	10.9806	0.199713	0.654953	393.356	10.9821	2.79189
UK032	UK032_120	180.9	1.365	0.0631	2.53566	2.72572	0.488953	12.711	12.7894	0.199485	0.0562	12.4555	12.4956	394.451	404.197	460.278	14.3017	394.556	10.4192	0.215088	0.642808	394.556	10.4208	2.64114
UK032	UK032_116	708	12.7	0.0635	1.88976	2.13804	0.476293	6.0037	6.16802	0.314766	0.0544	5.69853	5.78561	396.876	395.526	387.646	-2.3811	396.82	8.19025	0.019644	0.888536	396.82	8.19226	2.06448
UK032	UK032_53	266	2.154	0.0638	2.19436	2.41147	0.444236	9.75496	9.85694	0.224948	0.0505	9.50495	9.55741	398.694	373.235	218.073	-82.8261	397.997	9.28852	2.93218	0.0868299	397.997	9.2903	2.33427
UK032	UK032_7	273	3.28	0.0639	2.34742	2.55154	0.492509	9.07453	9.18406	0.258682	0.0559	8.76565	8.82251	399.3	406.619	448.399	10.9498	399.45	9.85989	0.239821	0.624336	399.45	9.86159	2.46879
UK032	UK032_119	215	1.642	0.0648	2.62346	2.80758	0.442264	11.0238	11.1141	0.237981	0.0495	10.7071	10.7537	404.751	371.848	171.582	-135.893	403.738	10.9685	3.92575	0.0475519	403.738	10.9701	2.71713
UK032	UK032_72	388	2.99	0.0648	2.77778	2.9523	0.494978	9.09865	9.2079	0.305296	0.0554	8.66426	8.72178	404.751	408.297	428.402	5.52074	404.849	11.5528	0.0574038	0.810647	404.849	11.5543	2.85398
UK032	UK032_94	214	0.9	0.0677	2.65879	2.84063	0.48726	10.1254	10.2237	0.262585	0.0522	9.77011	9.82116	422.284	403.041	294.181	-43.5457	421.682	11.5672	1.39078	0.238273	421.682	11.5688	2.74348
UK032	UK032_54	297	2.737	0.0684	2.77778	2.9523	0.489468	9.6567	9.7597	0.287653	0.0519	9.24855	9.30246	426.509	404.548	281.007	-51.779	425.662	12.1271	2.00697	0.156578	425.662	12.1287	2.84937
UK032	UK032_52	98.2	1.355	0.0689	3.19303	3.34596	0.512046	14.4572	14.5262	0.220861	0.0539	14.1002	14.1356	429.525	419.824	366.874	-17.0771	429.354	13.8774	0.159533	0.689587	429.354	13.8788	3.23249
UK032	UK032_146	633	1.562	0.069	2.17391	2.39288	0.55465	6.87098	7.01501	0.316391	0.0583	6.51801	6.59427	430.128	448.038	541.054	20.5018	430.657	9.92976	2.158	0.14183	430.657	9.93171	2.30618
UK032	UK032_97	255	1.116	0.0691	2.31548	2.5222	0.559265	9.48625	9.59109	0.244089	0.0587	9.19932	9.25351	430.731	451.048	555.987	22.5286	431.058	10.4939	1.40663	0.235616	431.058	10.4958	2.43489
UK032	UK032_55	202	4.01	0.0709	1.97461	2.21339	0.52691	12.22	12.3015	0.161589	0.0539	12.0594	12.1008	441.576	429.757	366.874	-20.3617	441.415	9.42931	0.311263	0.576906	441.415	9.43147	2.13664
UK032	UK032_130	232	1.371	0.0709	2.39774	2.59792	0.5709	10.8838	10.9753	0.220303	0.0584	10.6164	10.6634	441.576	458.597	544.801	18.9473	441.813	11.0733	0.728385	0.393407	441.813	11.0752	2.50676
UK032	UK032_74	99.1	1.06	0.0718	3.20334	3.3558	0.485089	18.0418	18.0971	0.177552	0.049	17.7551	17.7832	446.991	401.559	147.831	-202.366	446.13	14.4522	2.46085	0.116715	446.13	14.4536	3.23978
UK032	UK032_151	71.2	1.169	0.0735	3.67347	3.80715	0.608051	20.3346	20.3837	0.180652	0.06	20	20.025	457.208	482.33	603.575	24.25	457.366	16.796	0.415328	0.519278	457.366	16.7973	3.67262
UK032	UK032_147	205	3.86	0.0752	2.65957	2.84136	0.606562	11.0928	11.1826	0.239757	0.0585	10.7692	10.8156	467.408	481.389	548.538	14.7902	467.65	12.7897	0.443809	0.50529	467.65	12.7915	2.73527
UK032	UK032_60	510	40.6	0.0869	1.72612	1.99487	0.720104	6.55418	6.70502	0.263362	0.0601	6.3228	6.40139	537.177	550.729	607.177	11.5287	537.657	10.2337	0.95001	0.329717	537.657	10.2366	1.90392
UK032	UK032_27	197	1.591	0.0891	3.25477	3.40493	0.707622	12.246	12.3274	0.265782	0.0576	11.8056	11.8478	550.212	543.333	514.58	-6.92451	550.001	17.8919	0.0756549	0.783274	550.001	17.8937	3.25339
UK032	UK032_11	290	0.845	0.0911	2.08562	2.31297	0.738579	7.44112	7.57431	0.280283	0.0588	7.14286	7.21252	562.039	561.576	559.699	-0.418176	562.02	12.381	0.000864077	0.976549	562.02	12.3836	2.2034
UK032	UK032_118	203	1.047	0.0918	2.50545	2.69764	0.797415	12.3209	12.4018	0.203349	0.063	12.0635	12.1049	566.174	595.369	708.231	20.058	566.574	14.6011	1.10433	0.293317	566.574	14.6033	2.57748
UK032	UK032_57	109	1.674	0.0926	3.13175	3.28753	0.717544	13.5346	13.6083	0.231389	0.0562	13.1673	13.2052	570.896	549.216	460.278	-24.0327	570.279	17.8927	0.604214	0.436975	570.278	17.8946	3.13787
UK032	UK032_108	460	1.976	0.0935	1.92513	2.16936	0.809604	6.654	6.80263	0.28932	0.0628	6.36943	6.44745	576.203	602.232	701.465	17.8571	577.152	11.9055	2.99338	0.0836053	577.152	11.9083	2.06329
UK032	UK032_91	935	1.503	0.0937	1.49413	1.79789	0.766118	3.99952	4.24219	0.373578	0.0593	3.70995	3.84236	577.382	577.533	578.128	0.128925	577.397	9.78884	0.000295223	0.986291	577.397	9.79231	1.69594
UK032	UK032_117	334.5	1.957	0.094	1.80851	2.06657	0.71932	7.43065	7.56403	0.243385	0.0555	7.20721	7.27625	579.15	550.265	432.421	-33.932	577.81	11.3585	3.4793	0.0621409	577.809	11.3614	1.96629
UK032	UK032_132	442	1.784	0.0939	1.70394	1.97571	0.793647	5.64659	5.821	0.301764	0.0613	5.38336	5.47545	578.561	593.239	649.777	10.9601	579.292	10.8588	1.34814	0.245604	579.292	10.8619	1.87503
UK032	UK032_107	392	37.4	0.0943	2.01485	2.24936	0.769723	7.05077	7.1912	0.285763	0.0592	6.75676	6.83036	580.918	579.604	574.459	-1.12435	580.858	12.4167	0.0073681	0.931595	580.858	12.4194	2.13812
UK032	UK032_140	354	1.603	0.0971	1.64779	1.92748	0.767141	6.49521	6.64739	0.253692	0.0573	6.28272	6.36181	597.391	578.121	503.098	-18.7425	596.406	10.9031	1.85174	0.173582	596.405	10.9063	1.82868
UK032	UK032_46	605	0.649	0.097	2.37113	2.57338	0.813161	6.37818	6.53308	0.371757	0.0608	5.92105	6.0049	596.804	604.226	632.166	5.59382	597.295	14.5505	0.282238	0.595238	597.295	14.553	2.43649
UK032	UK032_143	394	2.963	0.0971	1.75077	2.01624	0.862197	5.70982	5.88235	0.306625	0.0644	5.43478	5.52602	597.391	631.321	754.795	20.8538	598.85	11.4427	6.36391	0.0116465	598.85	11.4459	1.9113
UK032	UK032_138	924	416	0.0973	1.54162	1.83755	0.818359	4.68702	4.89572	0.328914	0.061	4.42623	4.53779	598.566	607.133	639.234	6.36193	599.168	10.3942	0.638647	0.424201	599.169	10.3977	1.73535
UK032	UK032_77	808	0.916	0.0983	1.42421	1.74022	0.798307	4.47705	4.6951	0.318114	0.0589	4.24448	4.36069	604.439	595.873	563.402	-7.28375	603.732	9.90149	0.714746	0.397873	603.732	9.90515	1.64065
UK032	UK032_84	536	0.966	0.0988	1.61943	1.9033	0.788745	6.25807	6.41587	0.258775	0.0579	6.04491	6.12706	607.373	590.46	525.98	-15.4745	606.467	10.9331	1.48354	0.223221	606.466	10.9364	1.8033
UK032	UK032_125	124.8	1.451	0.0993	2.41692	2.61563	0.881732	12.1984	12.2801	0.198135	0.0644	11.9565	11.9983	610.305	641.917	754.795	19.1429	610.765	15.2062	1.1779	0.277783	610.766	15.2087	2.49011
UK032	UK032_28	559	0.997	0.0996	1.60643	1.89225	0.834957	5.34576	5.52966	0.300504	0.0608	5.09868	5.19582	612.064	616.359	632.166	3.17981	612.325	10.9469	0.12146	0.727456	612.325	10.9503	1.78832
UK032	UK032_96	184.8	1.605	0.0998	2.30461	2.51221	0.811865	9.27396	9.38117	0.248503	0.059	8.98305	9.03854	613.237	603.5	567.096	-8.13631	612.885	14.6204	0.221692	0.637754	612.885	14.6229	2.38592
UK032	UK032_63	300	1.127	0.1008	2.28175	2.49126	0.799152	7.65244	7.78202	0.298172	0.0575	7.30435	7.37248	619.095	596.35	510.762	-21.2102	617.747	14.5747	1.85123	0.173641	617.747	14.5773	2.35975
UK032	UK032_17	552	1.673	0.1005	1.49254	1.79657	0.871602	4.69506	4.90343	0.317895	0.0629	4.45151	4.56245	617.338	636.437	704.851	12.4158	618.565	10.4761	2.90802	0.0881401	618.566	10.4797	1.6942
UK032	UK032_139	902	0.795	0.1006	1.49105	1.79534	0.861372	4.44438	4.66396	0.335492	0.0621	4.1868	4.30456	617.924	630.872	677.554	8.80078	618.892	10.4598	1.51919	0.217742	618.893	10.4635	1.69068
UK032	UK032_41	107	1.97	0.1016	3.24803	3.39849	0.801292	13.5082	13.582	0.240449	0.0572	13.1119	13.15	623.779	597.557	499.252	-24.9425	622.884	20.1078	0.787986	0.37471	622.884	20.1097	3.22848
UK032	UK032_95	634	4.08	0.102	2.35294	2.55663	0.887423	5.02263	5.21794	0.468468	0.0631	4.4374	4.54868	626.119	644.984	711.603	12.0128	628.034	15.0788	2.82096	0.0930407	628.033	15.0815	2.40139
UK032	UK032_137	51.3	1.217	0.1029	3.88727	4.01383	0.86404	15.4399	15.5045	0.251768	0.0609	14.9425	14.976	631.382	632.326	635.704	0.67993	631.408	24.0615	0.000709905	0.978744	631.408	24.0631	3.81103
UK032	UK032_24	288	0.953	0.1033	1.7425	2.00905	0.83464	6.71468	6.86199	0.259506	0.0586	6.48464	6.56129	633.719	616.183	552.267	-14.7487	632.797	12.0203	1.31188	0.252055	632.796	12.0236	1.90007
UK032	UK032_16	145.5	1.35	0.1034	2.41779	2.61644	0.892475	9.11255	9.22163	0.265326	0.0626	8.78594	8.84267	634.303	647.698	694.67	8.68999	634.751	15.7392	0.387526	0.533602	634.751	15.7417	2.47999
UK032	UK032_67	293	1.332	0.1035	2.1256	2.34908	0.951848	8.37034	8.48897	0.253945	0.0667	8.09595	8.15748	634.888	679.064	828.42	23.3616	635.973	14.1639	4.4989	0.0339167	635.973	14.1667	2.22757
UK032	UK032_98	114.5	0.615	0.1043	2.58869	2.77512	0.920377	11.3918	11.4792	0.227242	0.064	11.0938	11.1387	639.559	662.559	741.63	13.7631	640.054	16.8535	0.695543	0.404285	640.055	16.8559	2.63352
UK032	UK032_123	206	2.97	0.1051	2.18839	2.40605	0.933233	9.41923	9.52481	0.232332	0.0644	9.16149	9.21591	644.228	669.334	754.795	14.6486	644.854	14.7047	1.1857	0.276198	644.854	14.7076	2.28076
UK032	UK032_70	199	1.028	0.1057	2.45979	2.65529	0.897753	9.41781	9.5234	0.261185	0.0616	9.09091	9.14574	647.727	650.526	660.251	1.89687	647.828	16.2833	0.0158763	0.899731	647.828	16.2859	2.51392
UK032	UK032_149	472	0.661	0.1156	1.6436	1.92391	1.04081	5.31416	5.49912	0.309287	0.0653	5.0536	5.15159	705.189	724.321	784.017	10.0544	706.432	12.7232	1.92136	0.165707	706.432	12.727	1.80159
UK032	UK032_23	185.4	1.561	0.1425	1.96491	2.20474	1.34785	6.43003	6.58371	0.305584	0.0686	6.12245	6.20358	858.784	866.628	886.736	3.15222	859.378	17.5008	0.178297	0.672841	859.378	17.5048	2.03692
UK032	UK032_13	285	2.985	0.1606	1.55666	1.85019	1.50576	5.23672	5.42432	0.297259	0.068	5	5.09902	960.11	932.723	868.554	-10.5412	957.02	16.1135	2.93861	0.0864852	957.019	16.1186	1.68426
UK032	UK032_76	218	2.165	0.1657	1.87085	2.12134	1.63582	5.89153	6.05889	0.317549	0.0716	5.58659	5.67539	988.376	984.105	974.592	-1.41424	987.925	19.0473	0.0536445	0.816839	987.925	19.052	1.92848
UK032	UK032_66	164.7	1.907	0.1673	2.27137	2.48176	1.7462	6.61115	6.76072	0.343566	0.0757	6.20872	6.28873	997.218	1025.76	1087.15	8.27211	999.951	22.56	1.82689	0.176495	999.951	22.5641	2.25652
UK032	UK032_33	22	3.33	0.1677	4.83005	4.93249	1.94229	20.8065	20.8545	0.232142	0.084	20.2381	20.2628	999.426	1095.79	1292.55	22.6781	1001.49	45.5475	1.82045	0.177259	1001.5	45.5496	4.54816
UK032	UK032_100	53.1	10.81	0.1702	3.46651	3.60787	1.8938	12.153	12.235	0.28524	0.0807	11.6481	11.6909	1013.21	1078.92	1214.15	16.5495	1016.22	33.6077	2.63474	0.104549	1016.22	33.6105	3.3074
UK032	UK032_122	58.9	1.93	0.1721	3.54445	3.68282	1.70613	12.2087	12.2904	0.290321	0.0719	11.6829	11.7256	1023.67	1010.83	983.111	-4.12568	1022.71	34.3984	0.11467	0.734889	1022.71	34.4011	3.36372
UK032	UK032_142	295	1.268	0.172	1.80233	2.06116	1.75968	4.55008	4.76479	0.396109	0.0742	4.1779	4.29591	1023.12	1030.73	1046.91	2.27249	1024.36	18.9025	0.269334	0.603779	1024.36	18.9076	1.8458
UK032	UK032_73	121.1	2.899	0.173	2.48555	2.67917	1.78184	8.28012	8.40003	0.300183	0.0747	7.89826	7.96131	1028.62	1038.85	1060.44	3.00079	1029.44	25.1107	0.148368	0.7001	1029.44	25.1145	2.43963
UK032	UK032_83	85.3	1.118	0.175	2.62857	2.81236	1.80244	10.7675	10.86	0.24412	0.0747	10.4418	10.4895	1039.6	1046.34	1060.44	1.96518	1039.96	26.7453	0.0374435	0.846565	1039.96	26.749	2.57212
UK032	UK032_61	284	2.66	0.178	1.68539	1.95973	1.87015	4.89263	5.09292	0.344476	0.0762	4.59318	4.70077	1056.04	1070.58	1100.33	4.02522	1057.93	18.6026	0.792238	0.373424	1057.93	18.6081	1.7589
UK032	UK032_99	321.6	4.45	0.1782	3.42312	3.5662	1.90665	8.69212	8.80641	0.393819	0.0776	7.98969	8.05203	1057.13	1083.41	1136.65	6.99578	1060.38	34.0671	0.890283	0.345401	1060.38	34.0702	3.21303
UK032	UK032_12	47.8	1.388	0.1793	3.29057	3.43917	1.95056	10.4192	10.5147	0.315819	0.0789	9.88593	9.93638	1063.15	1098.64	1169.63	9.10358	1065.79	33.2999	1.05982	0.303256	1065.79	33.303	3.12471
UK032	UK032_39	148.5	1.557	0.1825	2.08219	2.30988	1.76645	7.69449	7.82338	0.270608	0.0702	7.40741	7.4746	1080.62	1033.22	934.209	-15.672	1076.02	22.5058	3.78143	0.0518244	1076.02	22.5104	2.092
UK032	UK032_71	528	4.097	0.1818	1.59516	1.88269	1.92511	4.46157	4.68035	0.357533	0.0768	4.16667	4.28499	1076.8	1089.84	1116	3.51259	1078.74	18.1106	0.741635	0.389138	1078.74	18.1164	1.6794
UK032	UK032_47	368	3.39	0.1836	1.90632	2.15268	1.96443	4.89663	5.09676	0.389313	0.0776	4.51031	4.61984	1086.61	1103.4	1136.65	4.40236	1089.27	20.8792	1.04676	0.306255	1089.27	20.8844	1.91728
UK032	UK032_152	54.5	1.636	0.1887	2.91468	3.08145	2.3156	12.6986	12.7771	0.229528	0.089	12.3596	12.3999	1114.33	1217.08	1404.16	20.6409	1117.38	31.3969	4.87391	0.0272657	1117.39	31.4006	2.81018
UK032	UK032_131	180	1.693	0.1935	1.80879	2.06681	2.14505	6.0005	6.1649	0.301439	0.0804	5.72139	5.80813	1140.31	1163.46	1206.82	5.51119	1142.68	21.1593	1.21446	0.270451	1142.68	21.1648	1.8522
UK032	UK032_37	319	4.24	0.1956	1.99387	2.23058	2.17103	5.12431	5.31588	0.389099	0.0805	4.7205	4.82526	1151.64	1171.81	1209.26	4.76528	1154.97	22.7727	1.29192	0.255695	1154.97	22.778	1.97218
UK032	UK032_85	636	1.444	0.1966	3.10275	3.25991	2.13334	5.42266	5.60404	0.572182	0.0787	4.44727	4.55831	1157.03	1159.67	1164.6	0.650043	1157.99	32.1946	0.0239275	0.87707	1157.99	32.1994	2.78063
UK032	UK032_45	389	1.561	0.1993	1.75615	2.0209	2.12142	3.79824	4.05298	0.462358	0.0772	3.36788	3.5132	1171.56	1155.8	1126.36	-4.01274	1167.12	20.3711	1.44944	0.228617	1167.12	20.3776	1.74597
UK032	UK032_133	809	3.52	0.1989	2.81549	2.9878	2.20217	4.98153	5.17839	0.565184	0.0803	4.10959	4.22951	1169.41	1181.73	1204.37	2.90256	1173.74	29.8799	0.591383	0.441885	1173.74	29.8852	2.54615
UK032	UK032_21	97.8	2.841	0.2013	2.18579	2.40368	2.1316	7.61223	7.74249	0.287142	0.0768	7.29167	7.35992	1182.3	1159.11	1116	-5.94076	1179.83	25.3819	0.800004	0.371092	1179.83	25.3866	2.15171
UK032	UK032_148	271	5.29	0.204	2.35294	2.55663	2.25301	4.85322	5.05507	0.48482	0.0801	4.24469	4.3609	1196.77	1197.73	1199.45	0.223311	1197.04	26.4118	0.0033735	0.953683	1197.04	26.4171	2.20688
UK032	UK032_56	289.5	3.432	0.206	1.60194	1.88844	2.16433	5.23786	5.42542	0.305839	0.0762	4.98688	5.08615	1207.47	1169.66	1100.33	-9.73727	1201.72	20.0547	4.27953	0.038574	1201.72	20.0608	1.66935
UK032	UK032_59	168.4	2.578	0.2051	1.85275	2.1054	2.46877	7.22886	7.3659	0.2563	0.0873	6.9874	7.05859	1202.66	1262.93	1367.13	12.03	1206.74	22.7969	5.04749	0.0246617	1206.74	22.8025	1.88959
UK032	UK032_3	283.8	5.5	0.2109	1.84922	2.10229	2.39028	4.75396	4.95986	0.388984	0.0822	4.37956	4.49228	1233.61	1239.7	1250.29	1.3337	1234.8	22.6303	0.126532	0.722055	1234.8	22.6362	1.83319
UK032	UK032_19	483.2	2.685	0.2131	1.5955	1.88298	2.50337	3.33999	3.62706	0.477694	0.0852	2.93427	3.09999	1245.31	1273.01	1320.09	5.66491	1253.34	20.0393	4.95633	0.0259953	1253.34	20.047	1.59949
UK032	UK032_113	185	2.617	0.2245	1.78174	2.04318	2.58466	5.78995	5.96016	0.30773	0.0835	5.50898	5.59901	1305.61	1296.3	1280.93	-1.92673	1304.27	23.3593	0.189638	0.663218	1304.27	23.3654	1.79145
UK032	UK032_121	123	2.191	0.2296	2.09059	2.31745	2.6972	6.45141	6.6046	0.324052	0.0852	6.10329	6.18467	1332.4	1327.69	1320.09	-0.932348	1331.7	26.9836	0.0389733	0.843502	1331.7	26.9891	2.02666
UK032	UK032_1	296.8	2.773	0.2324	1.89329	2.14115	2.78456	4.1406	4.37545	0.45725	0.0869	3.68239	3.81576	1347.07	1351.4	1358.28	0.825537	1348.35	24.3397	0.077651	0.780506	1348.35	24.3466	1.80566
UK032	UK032_34	132.9	3.1	0.238	2.22689	2.44111	2.92057	5.42221	5.60361	0.410698	0.089	4.94382	5.04394	1376.29	1387.26	1404.16	1.98471	1378.8	28.7551	0.2881	0.591441	1378.8	28.7608	2.08592
UK032	UK032_82	268.5	2.85	0.245	3.59184	3.72844	3.07403	9.29358	9.40057	0.386486	0.091	8.57143	8.62956	1412.64	1426.24	1446.6	2.34786	1415.17	45.4689	0.153142	0.695551	1415.17	45.4725	3.21321
UK032	UK032_135	207	1.974	0.2459	1.66734	1.94423	3.03447	4.66564	4.87527	0.357367	0.0895	4.35754	4.47081	1417.3	1416.33	1414.88	-0.170645	1417.09	23.4965	0.00277816	0.957964	1417.09	23.5035	1.65857
UK032	UK032_62	221	1.928	0.2524	2.13946	2.36163	3.31653	4.61785	4.82955	0.463302	0.0953	4.09234	4.21275	1450.84	1484.95	1534.01	5.4217	1460.94	28.6999	3.55141	0.0594949	1460.94	28.7065	1.96494
UK032	UK032_136	120.9	2.861	0.2556	1.83881	2.09314	3.32686	5.60672	5.78233	0.327966	0.0944	5.29661	5.39018	1467.29	1487.38	1516.13	3.22128	1470.68	26.3946	0.804369	0.36979	1470.68	26.4012	1.79517
UK032	UK032_129	198	1.922	0.26	1.61538	1.89986	3.39488	4.81944	5.02265	0.335181	0.0947	4.54065	4.64947	1489.84	1503.21	1522.11	2.1202	1492.45	24.0762	0.465655	0.494993	1492.45	24.0836	1.61369
UK032	UK032_8	79.2	2.971	0.2692	2.48886	2.68224	3.31457	6.64288	6.79175	0.374665	0.0893	6.15901	6.23967	1536.74	1484.49	1410.6	-8.94211	1523.62	34.4266	4.17134	0.0411132	1523.62	34.432	2.25987
UK032	UK032_69	336	1.087	0.2721	1.5803	1.87012	3.74421	4.12253	4.35836	0.383333	0.0998	3.80762	3.93674	1551.45	1580.88	1620.36	4.2525	1558.94	24.1848	2.85486	0.0910984	1558.94	24.1929	1.55188
UK032	UK032_44	58	2.094	0.2747	2.62104	2.80533	3.57167	7.97234	8.0968	0.328767	0.0943	7.52916	7.59528	1564.61	1543.26	1514.13	-3.33424	1560.74	37.2898	0.462714	0.496358	1560.74	37.2949	2.38957
UK032	UK032_31	206.7	0.987	0.2746	1.38383	1.70733	3.84298	3.89915	4.14769	0.354906	0.1015	3.64532	3.77999	1564.11	1601.8	1651.73	5.30471	1573	22.3	4.98319	0.0255948	1573	22.3087	1.41823
UK032	UK032_104	375	1.234	0.2815	1.49201	1.79613	3.86968	3.09193	3.4	0.482549	0.0997	2.70812	2.88686	1598.91	1607.38	1618.49	1.20978	1602.49	22.719	0.39397	0.53022	1602.49	22.7295	1.41838
UK032	UK032_49	160.3	0.839	0.2819	1.8801	2.1295	3.99567	5.30539	5.49064	0.354375	0.1028	4.96109	5.06087	1600.92	1633.32	1675.28	4.4385	1607.73	28.6691	2.11582	0.145784	1607.73	28.6762	1.78364
UK032	UK032_35	284	1.019	0.2894	1.6586	1.93674	3.89049	3.22794	3.52415	0.513827	0.0975	2.76923	2.94426	1638.53	1611.71	1576.84	-3.91195	1625.18	24.4349	3.73034	0.0534327	1625.19	24.4454	1.50415
UK032	UK032_50	130.3	1.248	0.2897	1.864	2.1153	4.11422	5.65579	5.82992	0.329573	0.103	5.33981	5.43264	1640.03	1657.13	1678.87	2.31361	1643.41	29.1348	0.515561	0.472741	1643.41	29.1419	1.77326
UK032	UK032_109	124	1.046	0.29	1.82759	2.08328	4.26242	5.03391	5.22879	0.363055	0.1066	4.69043	4.79585	1641.53	1686.14	1742.08	5.77161	1651.49	28.562	4.26777	0.0388419	1651.49	28.5694	1.72992
UK032	UK032_86	302	3.334	0.301	1.59468	1.88229	4.41165	3.82863	4.08147	0.416516	0.1063	3.48071	3.62152	1696.27	1714.53	1736.91	2.33999	1702.41	25.6321	1.16223	0.281005	1702.4	25.6412	1.50617
UK032	UK032_4	43.7	1.556	0.3078	2.859	3.02884	4.50283	7.80015	7.92732	0.366531	0.1061	7.2573	7.32588	1729.87	1731.49	1733.46	0.206733	1730.25	43.3037	0.00248638	0.960231	1730.25	43.309	2.50304
UK032	UK032_43	62.8	2.16	0.3161	2.15122	2.37229	4.69398	7.11127	7.25053	0.302508	0.1077	6.77809	6.85146	1770.65	1766.17	1760.86	-0.555973	1769.83	34.9876	0.0219289	0.882276	1769.83	34.9942	1.97727
UK032	UK032_126	60	0.804	0.3294	2.67152	2.85255	4.73706	7.67102	7.80029	0.348262	0.1043	7.1908	7.26	1835.47	1773.82	1702.01	-7.84178	1818.97	42.3027	3.67399	0.0552678	1818.97	42.3084	2.32595
UK032	UK032_51	103.2	1.306	0.3299	1.87936	2.12885	5.0945	5.34153	5.52558	0.351839	0.112	5	5.09902	1837.9	1835.19	1832.12	-0.315257	1837.17	31.5987	0.0131323	0.908765	1837.17	31.6065	1.72039
UK032	UK032_65	229	3.66	0.3428	1.60443	1.89056	5.26535	3.76962	4.02617	0.425622	0.1114	3.41113	3.55469	1900.13	1863.26	1822.38	-4.2661	1884.23	27.2847	4.43776	0.0351524	1884.23	27.2946	1.44858
UK032	UK032_42	108.8	1.301	0.3419	2.04738	2.27855	5.3081	5.37829	5.56112	0.380675	0.1126	4.97336	5.0729	1895.8	1870.17	1841.8	-2.93224	1887.46	34.0974	1.15376	0.282764	1887.46	34.1049	1.80692
UK032	UK032_26	109.6	1.541	0.347	1.84438	2.09803	5.61214	4.56637	4.78035	0.403905	0.1173	4.17732	4.29535	1920.26	1917.97	1915.49	-0.248991	1919.42	31.3602	0.0120081	0.912741	1919.43	31.3689	1.63428
UK032	UK032_144	178.4	0.894	0.3501	1.62811	1.91069	5.79261	3.78475	4.04034	0.430175	0.12	3.41667	3.56	1935.08	1945.31	1956.22	1.08075	1939.33	28.2238	0.325403	0.568379	1939.33	28.234	1.45586
UK032	UK032_127	242	1.179	0.3533	1.78319	2.04445	5.90402	3.32406	3.61239	0.536449	0.1212	2.80528	2.97819	1950.34	1961.82	1973.97	1.197	1957.16	28.7282	0.522121	0.469938	1957.15	28.7406	1.46849
UK032	UK032_5	312.5	1.584	0.3532	1.69875	1.97123	5.94617	3.26187	3.55525	0.520792	0.1221	2.7846	2.95872	1949.86	1968.01	1987.14	1.8759	1960.11	27.9488	1.33055	0.248708	1960.11	27.9612	1.42652
UK032	UK032_30	195.4	1.359	0.3693	1.54346	1.8391	6.49218	3.42617	3.70657	0.450491	0.1275	3.05882	3.21814	2026.11	2044.84	2063.79	1.82583	2034.97	27.6032	1.21917	0.269524	2034.97	27.6148	1.35701
UK032	UK032_89	191	2.496	0.3671	2.20648	2.42251	6.52943	3.74281	4.00108	0.589525	0.129	3.02326	3.18435	2015.74	2049.88	2084.39	3.29342	2039.34	33.8552	3.70378	0.0542894	2039.33	33.8677	1.66073
UK032	UK032_78	171	4.19	0.3767	1.99097	2.228	6.71576	4.00953	4.25163	0.496561	0.1293	3.48028	3.6211	2060.85	2074.7	2088.47	1.32267	2068.3	33.3037	0.513667	0.473556	2068.3	33.3142	1.61071
UK032	UK032_25	143.4	1.562	0.3742	2.11117	2.33603	6.7847	4.02088	4.26233	0.525052	0.1315	3.42205	3.56517	2049.13	2083.73	2118.09	3.25574	2068.9	34.4629	3.22108	0.0726957	2068.89	34.4737	1.66629
UK032	UK032_75	242	105	0.3784	1.47992	1.7861	6.83998	3.2545	3.54849	0.454729	0.1311	2.89855	3.0662	2068.81	2090.91	2112.75	2.08006	2079.75	27.0079	1.79613	0.180182	2079.74	27.0203	1.29921
UK032	UK032_32	69.8	0.831	0.3883	1.95725	2.19791	6.70306	5.10275	5.2951	0.383567	0.1252	4.71246	4.81739	2114.94	2073.02	2031.63	-4.10078	2098.76	35.1357	3.05282	0.0805972	2098.76	35.1441	1.67452
UK032	UK032_103	222	0.56	0.439	1.54897	1.84373	9.38204	3.46256	3.74023	0.447349	0.155	3.09677	3.25423	2346.16	2376.08	2401.83	2.31784	2362.23	30.1562	2.58272	0.108036	2362.22	30.169	1.27714
UK032	UK032_92	31.92	0.661	0.461	3.47072	3.61191	10.3035	6.60006	6.74988	0.525861	0.1621	5.61382	5.70219	2443.97	2462.42	2477.68	1.36061	2456.15	58.5729	0.304042	0.58136	2456.15	58.5807	2.38506
UK032	UK032_87	145.7	1.482	0.5134	1.73354	2.00129	13.2585	3.183	3.48303	0.544625	0.1873	2.66951	2.85067	2671.13	2698.23	2718.6	1.74608	2692.39	32.0521	2.05904	0.151305	2692.38	32.0688	1.19109
UK032	UK032_128	232.2	5.07	0.5186	1.42692	1.74244	13.3642	2.52791	2.8966	0.564466	0.1869	2.08668	2.31392	2693.24	2705.73	2715.07	0.804137	2703.81	26.9659	0.603551	0.437226	2703.81	26.9866	0.998097
UK032	UK032_111	148.7	1.101	0.5194	1.67501	1.95081	13.5352	3.22109	3.51787	0.520013	0.189	2.75132	2.92742	2696.64	2717.75	2733.48	1.34789	2712.4	31.992	1.2158	0.270187	2712.39	32.0081	1.18007
UK032	UK032_102	168.6	2.68	0.5313	1.78807	2.0487	14.1237	3.32293	3.61135	0.5381	0.1928	2.80083	2.974	2746.93	2758.05	2766.19	0.696549	2755.71	33.2868	0.312502	0.576149	2755.71	33.3029	1.20851
UK032	UK032_10	17.6	1.263	0.573	3.66492	3.7989	16.0381	7.37849	7.5128	0.496703	0.203	6.40394	6.48155	2920.13	2879.07	2850.47	-2.4437	2890.57	67.2084	0.998958	0.317563	2890.57	67.2159	2.32535
UK032	UK032_6	197.9	3.18	0.5791	1.67501	1.95081	16.7917	2.94734	3.26907	0.568313	0.2103	2.42511	2.62319	2945.08	2923.01	2907.86	-1.27993	2925.34	30.9935	1.32467	0.249756	2925.35	31.0125	1.06013
UK032	UK032_2	577	0.863	0.0549	2.36794	2.57044	0.548797	7.55319	7.68444	0.313502	0.0725	7.17241	7.24179	344.535	444.208	1000.01	65.5469	343.518	8.62032	52.25	4.88651e-13
UK032	UK032_9	242	3.61	0.2218	3.74211	3.87342	3.66064	5.1298	5.32117	0.729484	0.1197	3.50877	3.64849	1291.38	1562.83	1951.75	33.8347	1364.04	43.9244	262.504	4.88425e-59
UK032	UK032_20	60.8	2.271	0.551	2.72232	2.90018	16.8885	4.73048	4.93735	0.575485	0.2223	3.86865	3.9958	2829.33	2928.53	2997.42	5.60796	2912.15	47.2261	13.0898	0.000296908
UK032	UK032_29	540	1.791	0.3469	1.38368	1.70721	5.90229	2.32132	2.71819	0.596075	0.1234	1.86386	2.11517	1919.78	1961.57	2005.96	4.29618	1949.11	22.807	12.4086	0.000427363
UK032	UK032_36	1700	1.575	0.0572	1.74825	2.01405	0.494498	4.06356	4.30262	0.430227	0.0627	3.66826	3.80212	358.575	407.971	698.071	48.6335	359.523	7.01896	54.534	1.52782e-13
UK032	UK032_38	402	1.547	0.2588	1.39104	1.71318	3.67182	3.31827	3.60707	0.419205	0.1029	3.01263	3.17427	1483.7	1565.26	1677.08	11.5307	1505.15	21.33	32.1034	1.46183e-08
UK032	UK032_40	320.9	2.374	0.2848	1.75562	2.02044	4.47265	3.38769	3.67102	0.518235	0.1139	2.89728	3.065	1615.49	1725.91	1862.55	13.2645	1657.22	26.4186	55.4131	9.7684e-14
UK032	UK032_48	205	2.148	0.1194	2.84757	3.01806	1.30386	7.04091	7.18154	0.404432	0.0792	6.43939	6.51658	727.109	847.424	1177.14	38.2307	730.057	20.7195	36.068	1.90555e-09
UK032	UK032_64	133.9	1.697	0.3453	2.1141	2.33868	6.1274	4.2197	4.45037	0.501009	0.1287	3.6519	3.78634	1912.12	1994.16	2080.29	8.08418	1949.22	34.1919	17.5991	2.72716e-05
UK032	UK032_80	149	1.776	0.4539	1.69641	1.96921	11.7407	3.62034	3.88676	0.468577	0.1876	3.19829	3.35098	2412.57	2583.95	2721.23	11.3429	2498.5	33.7026	74.0728	7.52872e-18
UK032	UK032_93	506	1.221	0.2663	1.46451	1.77336	3.77455	3.17851	3.47892	0.460755	0.1028	2.82101	2.99301	1521.99	1587.35	1675.28	9.14998	1543.44	22.1956	22.5137	2.08654e-06
UK032	UK032_105	159.8	1.277	0.3515	1.84922	2.10229	6.56214	4.26249	4.49097	0.433835	0.1354	3.84047	3.96853	1941.76	2054.28	2169.17	10.4839	1980.18	32.1634	30.3999	3.5154e-08
UK032	UK032_112	344	3.73	0.26	2.5	2.69258	3.69243	3.83841	4.09064	0.651312	0.103	2.91262	3.07951	1489.84	1569.73	1678.87	11.2594	1536.02	31.4377	30.6589	3.07614e-08
UK032	UK032_115	71.2	1.339	0.3204	2.2784	2.4882	5.26587	6.14286	6.30355	0.370903	0.1192	5.7047	5.79168	1791.68	1863.35	1944.27	7.84789	1807.98	36.7952	6.91461	0.00854945
UK032	UK032_124	583	3.65	0.2898	2.13941	2.36158	4.26747	3.31184	3.60115	0.645987	0.1068	2.52809	2.71868	1640.53	1687.11	1745.51	6.01425	1671.93	28.7135	11.7402	0.000611641
UK032	UK032_134	128.6	2.054	0.2211	2.17096	2.39021	2.8016	6.57136	6.72181	0.330367	0.0919	6.20239	6.28249	1287.68	1355.96	1465.32	12.1227	1295.24	27.31	7.4379	0.00638645
UK032	UK032_141	209	2.616	0.306	1.79739	2.05684	4.72964	3.83687	4.0892	0.468451	0.1121	3.38983	3.53425	1720.99	1772.51	1833.74	6.14838	1740.61	28.1277	9.13261	0.00251093
UK032	UK032_145	114.1	1.147	0.2084	2.4952	2.68813	2.97112	7.76208	7.88986	0.32146	0.1034	7.3501	7.41781	1220.29	1400.26	1686.03	27.6235	1229.29	29.6807	33.419	7.42956e-09
Sample: Cadomin Formation		Lat 53.905767		Long -119.054557		Datum NAD83		Beam Diameter: 22 µm
Sample Details		U (ppm)1	U/Th	Final 206Pb/238U (2σ)			Final 207Pb/235U (2σ)			Error Correlation	Final 207Pb/206Pb (2σ)			Apparent Age (Ma)				Concordia Age (Internal + External Errors)				Accepted Ages2
Sample	Spot			206/238	Int. (%)3	I+E (%)4	207/235	Int. (%)3	I+E (%)4		207/206	Int. (%)3	I+E (%)4	206Pb/ 238U	207Pb/ 235U	207Pb/ 206Pb	Disc (%)5	Age (Ma)	± Ma	MSWD	Prob. Fit	Age (Ma)	2σ (Ma)	2σ (%)
UK033	UK033_122	2990	3.29	0.018	2.61111	3.22728	0.120866	12.3932	12.5773	0.210689	0.0487	12.115	12.1562	115.004	115.856	133.413	13.7988	115.017	3.6725	0.0159927	0.899366	115.017	3.6725	3.19301
UK033	UK033_65	1585	0.674	0.01827	1.86097	2.65719	0.118144	8.31332	8.58537	0.223855	0.0469	8.10235	8.16382	116.713	113.388	44.1381	-164.427	116.585	3.05374	0.543431	0.461014	116.585	3.05374	2.61933
UK033	UK033_152	710	2.006	0.01831	2.78536	3.36982	0.13355	17.7996	17.9283	0.156484	0.0529	17.5803	17.6088	116.966	127.283	324.51	63.956	117.012	3.90484	0.938655	0.332624	117.012	3.90484	3.33713
UK033	UK033_114	933	2.242	0.01858	2.31432	2.99224	0.127322	11.1089	11.314	0.208329	0.0497	10.8652	10.9111	118.675	121.688	180.987	34.4288	118.728	3.51146	0.223951	0.636046	118.728	3.51146	2.95757
UK033	UK033_21	1217	2.815	0.01976	2.17611	2.88667	0.130776	8.41137	8.68035	0.258711	0.048	8.125	8.18631	126.139	124.795	99.2691	-27.0677	126.091	3.58836	0.0738815	0.785767	126.091	3.58836	2.84586
UK033	UK033_142	592	2.48	0.02908	2.09766	2.828	0.196067	10.0376	10.264	0.208981	0.0489	9.81595	9.86676	184.788	181.793	143.039	-29.1869	184.7	5.12833	0.127749	0.720777	184.7	5.12833	2.77657
UK033	UK033_69	377	1.996	0.02905	2.82272	3.40076	0.233516	14.0094	14.1726	0.201487	0.0583	13.7221	13.7585	184.6	213.097	541.054	65.8815	184.729	6.18742	4.43429	0.0352238	184.729	6.18742	3.34946
UK033	UK033_13	60	1.486	0.0301	4.98339	5.33213	0.236561	31.9697	32.0416	0.155878	0.057	31.5789	31.5948	191.174	215.6	491.533	61.1066	191.181	10.044	0.616429	0.432377	191.181	10.044	5.25364
UK033	UK033_100	1011	2.009	0.03059	1.83066	2.63605	0.214683	7.49613	7.79675	0.244215	0.0509	7.26916	7.33762	194.24	197.475	236.304	17.8008	194.38	5.00857	0.223565	0.636337	194.38	5.00857	2.57669
UK033	UK033_33	320	2.997	0.03163	2.21309	2.91465	0.23681	13.0799	13.2545	0.169197	0.0543	12.8913	12.9301	200.742	215.805	383.513	47.657	200.917	5.75287	1.3827	0.239641	200.917	5.75287	2.86331
UK033	UK033_117	614	0.4601	0.04028	1.91162	2.6929	0.280467	8.7268	8.98634	0.219052	0.0505	8.51485	8.57337	254.568	251.028	218.073	-16.7355	254.422	6.67287	0.130371	0.718048	254.422	6.67287	2.62276
UK033	UK033_8	406	1.137	0.041	1.95122	2.72115	0.31205	10.5088	10.7253	0.185674	0.0552	10.3261	10.3744	259.028	275.769	420.333	38.3754	259.378	6.88745	1.692	0.193338	259.378	6.88745	2.65537
UK033	UK033_22	1104	1.188	0.04154	1.3481	2.32697	0.297259	5.93547	6.31088	0.227126	0.0519	5.78035	5.86621	262.372	264.257	281.007	6.63153	262.512	5.88337	0.0671376	0.795551	262.512	5.88337	2.24118
UK033	UK033_7	227	2.116	0.0531	2.63653	3.24788	0.418786	12.5186	12.7008	0.21061	0.0572	12.2378	12.2786	333.526	355.182	499.252	33.195	333.903	10.536	1.3211	0.250394	333.903	10.536	3.1554
UK033	UK033_56	217.9	1.08	0.0646	2.47678	3.11959	0.475636	11.5057	11.7038	0.215265	0.0534	11.236	11.2804	403.54	395.075	345.831	-16.6871	403.243	12.1323	0.204168	0.651377	403.243	12.1323	3.00869
UK033	UK033_130	142.4	5.55	0.0662	2.71903	3.3152	0.464598	16.1442	16.2859	0.168422	0.0509	15.9136	15.9449	413.221	387.45	236.304	-74.8685	412.609	13.2145	1.01057	0.314766	412.609	13.2145	3.20266
UK033	UK033_123	230.1	0.626	0.0675	2.51852	3.15283	0.567721	10.3123	10.5328	0.244225	0.061	10	10.0499	421.076	456.539	639.234	34.128	422.011	12.8099	3.42322	0.0642856	422.011	12.8099	3.03545
UK033	UK033_127	271	1.46	0.0682	2.19941	2.90428	0.55104	9.63992	9.8755	0.228157	0.0586	9.38567	9.43879	425.302	445.678	552.267	22.9898	426.015	11.8883	1.33867	0.247269	426.015	11.8883	2.79059
UK033	UK033_150	1240	1.364	0.0685	3.35766	3.85633	0.547797	9.2515	9.49672	0.362932	0.058	8.62069	8.6785	427.112	443.553	529.762	19.3766	427.953	15.8496	1.0407	0.307658	427.953	15.8496	3.70358
UK033	UK033_93	823	1.849	0.0863	1.3905	2.35179	0.699664	5.28813	5.70629	0.262947	0.0588	5.10204	5.19912	533.618	538.59	559.699	4.65988	534.225	11.6874	0.175056	0.675657	534.225	11.6874	2.18773
UK033	UK033_90	133.1	4.92	0.0865	2.31214	2.99055	0.73945	11.2088	11.412	0.206279	0.062	10.9677	11.0132	534.804	562.085	674.109	20.665	535.648	15.2709	1.23528	0.266382	535.648	15.2709	2.85092
UK033	UK033_153	135	2.75	0.0888	3.37838	3.87438	0.794619	15.1729	15.3236	0.222659	0.0649	14.792	14.8258	548.436	593.789	771.096	28.8758	549.265	20.3283	1.73784	0.187413	549.265	20.3283	3.701
UK033	UK033_86	226.1	1.59	0.0909	3.52035	3.99879	0.790851	14.5373	14.6946	0.24216	0.0631	14.1046	14.14	560.858	591.654	711.603	21.1839	561.634	21.4143	0.895363	0.344028	561.634	21.4143	3.81286
UK033	UK033_68	230	1.094	0.0936	1.81624	2.62605	0.844024	8.00688	8.289	0.226835	0.0654	7.79817	7.86202	576.793	621.364	787.231	26.7314	579.063	14.3491	5.30384	0.0212784	579.063	14.3491	2.47799
UK033	UK033_80	625	13.55	0.0954	1.67715	2.53184	0.811586	5.91535	6.29196	0.283525	0.0617	5.67261	5.76008	587.395	603.344	663.727	11.5005	589.078	13.8936	1.27112	0.259556	589.078	13.8936	2.35854
UK033	UK033_45	153.5	1.635	0.096	2.8125	3.39228	0.843164	10.4333	10.6514	0.269569	0.0637	10.0471	10.0967	590.925	620.89	731.685	19.2378	592.224	19.0341	1.51785	0.217945	592.224	19.0341	3.214
UK033	UK033_83	234	0.986	0.0965	2.07254	2.80942	0.814292	8.74585	9.00485	0.236974	0.0612	8.49673	8.55538	593.865	604.859	646.271	8.10896	594.513	15.7567	0.294123	0.58759	594.513	15.7567	2.65035
UK033	UK033_155	225	1.734	0.0971	2.05973	2.79998	0.826049	8.36139	8.63194	0.246338	0.0617	8.10373	8.16519	597.391	611.417	663.727	9.99438	598.274	15.7818	0.513124	0.47379	598.274	15.7818	2.63788
UK033	UK033_129	192	2.346	0.0972	2.26337	2.95301	0.821539	9.72861	9.9621	0.232651	0.0613	9.46166	9.51436	597.979	608.907	649.777	7.97172	598.534	16.7067	0.235615	0.627391	598.534	16.7067	2.79127
UK033	UK033_64	371	1.551	0.1025	1.7561	2.58482	0.82535	6.40964	6.75877	0.273978	0.0584	6.16438	6.24497	629.043	611.029	544.801	-15.463	626.882	15.06	1.40091	0.236571	626.882	15.06	2.40237
UK033	UK033_88	176.3	0.864	0.1032	2.51938	3.15352	0.840947	9.47803	9.71753	0.265813	0.0591	9.13706	9.19162	633.135	619.668	570.782	-10.9242	632.169	18.7587	0.378733	0.538282	632.169	18.7587	2.96735
UK033	UK033_115	266	1.429	0.1029	2.138	2.85805	0.892416	7.31466	7.62245	0.292289	0.0629	6.99523	7.06635	631.382	647.666	704.851	10.4235	632.765	16.9154	0.830163	0.362226	632.765	16.9154	2.67326
UK033	UK033_75	65	0.981	0.1072	3.07836	3.61576	0.799638	14.9235	15.0768	0.206275	0.0541	14.6026	14.6368	656.466	596.624	375.215	-74.9575	653.44	22.3352	3.35677	0.0669291	653.44	22.3352	3.41809
UK033	UK033_77	87.2	1.084	0.1608	2.05224	2.79448	1.72048	9.75441	9.98729	0.210391	0.0776	9.53608	9.58837	961.221	1016.2	1136.65	15.4339	964.601	24.6169	2.8398	0.0919554	964.601	24.6169	2.55203
UK033	UK033_76	208	3.517	0.1717	1.92196	2.70025	1.76845	6.06874	6.43638	0.316698	0.0747	5.75636	5.84257	1021.47	1033.95	1060.44	3.67488	1023.69	24.3995	0.359469	0.548801	1023.69	24.3995	2.38348
UK033	UK033_131	120.8	0.676	0.1747	2.28964	2.97319	1.703	8.79001	9.04774	0.260482	0.0707	8.48656	8.54528	1037.96	1009.66	948.752	-9.40214	1034.47	27.6472	0.990851	0.319535	1034.47	27.6472	2.67259
UK033	UK033_106	238	2.453	0.173	1.90751	2.68999	1.87486	6.64116	6.97871	0.287226	0.0786	6.36132	6.43944	1028.62	1072.25	1162.08	11.4846	1034.55	24.7512	3.49605	0.0615154	1034.55	24.7512	2.39246
UK033	UK033_30	103	2.911	0.1758	2.3322	3.00608	1.65797	8.79441	9.05202	0.265191	0.0684	8.47953	8.53829	1043.99	992.6	880.699	-18.541	1036.97	27.9807	3.38177	0.0659212	1036.97	27.9807	2.69832
UK033	UK033_147	114.7	1.96	0.1775	2.53521	3.16618	1.78658	7.43207	7.73519	0.341118	0.073	6.9863	7.05751	1053.3	1040.58	1013.95	-3.88083	1051.05	29.5279	0.269227	0.603851	1051.05	29.5279	2.80938
UK033	UK033_85	179	2.775	0.1776	1.97072	2.73517	1.90758	6.71422	7.04827	0.293515	0.0779	6.41849	6.49592	1053.85	1083.74	1144.32	7.90634	1058.25	25.6529	1.60586	0.205075	1058.25	25.6529	2.4241
UK033	UK033_38	66.9	1.016	0.1863	2.7912	3.37464	1.91625	10.047	10.2732	0.277815	0.0746	9.65147	9.70314	1101.3	1086.76	1057.74	-4.1178	1099.6	33.2561	0.187263	0.665205	1099.6	33.2561	3.02438
UK033	UK033_81	346	1.66	0.1874	2.29456	2.97698	2.02059	6.6729	7.00892	0.343862	0.0782	6.26598	6.34528	1107.28	1122.46	1151.96	3.87894	1110.11	28.9748	0.416482	0.518698	1110.11	28.9748	2.61009
UK033	UK033_134	40.99	1.538	0.1874	3.46852	3.95323	2.17045	14.7008	14.8563	0.235941	0.084	14.2857	14.3207	1107.28	1171.62	1292.55	14.3343	1110.57	39.8412	1.51701	0.218073	1110.57	39.8412	3.58744
UK033	UK033_145	60.7	1.387	0.1872	3.04487	3.58729	2.12684	10.6392	10.8531	0.286194	0.0824	10.1942	10.2431	1106.19	1157.56	1255.04	11.8603	1110.76	35.8252	1.88144	0.17017	1110.76	35.8252	3.2253
UK033	UK033_146	268	3.177	0.1931	1.65717	2.51866	2.06075	5.05945	5.49504	0.32754	0.0774	4.78036	4.88384	1138.15	1135.87	1131.51	-0.586102	1137.57	24.4427	0.0142988	0.904818	1137.57	24.4427	2.14867
UK033	UK033_43	350	1.883	0.195	1.48718	2.41021	2.01918	3.89066	4.44237	0.382244	0.0751	3.59521	3.73169	1148.4	1121.98	1071.18	-7.20934	1138.53	22.6002	2.91238	0.0879022	1138.53	22.6002	1.98503
UK033	UK033_79	364	0.931	0.1949	1.33402	2.31884	2.10952	3.92775	4.47489	0.339639	0.0785	3.69427	3.82722	1147.86	1151.92	1159.56	1.00826	1149.19	21.9983	0.0634578	0.801112	1149.19	21.9983	1.91425
UK033	UK033_138	255.5	2.264	0.1951	2.35777	3.02597	2.16548	5.61243	6.00806	0.420097	0.0805	5.09317	5.19041	1148.94	1170.03	1209.26	4.98827	1154.59	29.8927	1.07359	0.300136	1154.59	29.8927	2.58903
UK033	UK033_89	175.3	2.904	0.2003	1.49775	2.41675	2.24529	5.73412	6.12189	0.2612	0.0813	5.53506	5.62466	1176.93	1195.31	1228.71	4.21372	1180.46	24.5538	0.688202	0.406777	1180.46	24.5538	2.08002
UK033	UK033_14	28.3	1.628	0.2062	3.63725	4.10207	2.18918	16.0032	16.1462	0.227282	0.077	15.5844	15.6165	1208.54	1177.6	1121.19	-7.79095	1206.15	44.4191	0.317031	0.573398	1206.15	44.4191	3.68271
UK033	UK033_16	164.3	1.776	0.2114	1.79754	2.61315	2.41053	5.50147	5.90453	0.326738	0.0827	5.19952	5.29481	1236.27	1245.74	1262.14	2.04988	1238.58	27.4434	0.193227	0.660244	1238.58	27.4434	2.21571
UK033	UK033_19	249	1.621	0.2131	1.64242	2.50898	2.38878	4.83834	5.29216	0.339459	0.0813	4.55105	4.65962	1245.31	1239.24	1228.71	-1.35154	1243.52	26.0119	0.0977709	0.754521	1243.52	26.0119	2.09179
UK033	UK033_82	119.1	3.78	0.2137	2.66729	3.2729	2.54577	7.00885	7.32949	0.38056	0.0864	6.48148	6.55817	1248.5	1285.23	1347.15	7.32266	1256.34	35.3557	1.93811	0.163874	1256.34	35.3557	2.81419
UK033	UK033_36	140.4	2.585	0.2165	1.61663	2.49217	2.43883	4.80866	5.26504	0.336191	0.0817	4.52876	4.63786	1263.35	1254.13	1238.33	-2.02046	1260.58	26.0924	0.223963	0.636037	1260.58	26.0924	2.06987
UK033	UK033_71	32.1	0.857	0.2159	4.30755	4.70663	2.67915	11.9169	12.1082	0.361467	0.09	11.1111	11.156	1260.17	1322.72	1425.53	11.5996	1268.5	52.5109	2.0136	0.155895	1268.5	52.5109	4.1396
UK033	UK033_55	170.3	1.545	0.2332	1.88679	2.67533	2.75556	5.79974	6.18339	0.325324	0.0857	5.48425	5.57467	1351.25	1343.59	1331.42	-1.48891	1349.23	30.1949	0.106553	0.744103	1349.23	30.1949	2.23793
UK033	UK033_139	159.2	3.111	0.2312	1.85986	2.65641	2.90726	5.37584	5.78766	0.345967	0.0912	5.04386	5.14203	1340.79	1383.8	1450.78	7.58191	1351.95	29.9116	3.66886	0.0554382	1351.95	29.9116	2.21247
UK033	UK033_52	51.3	1.079	0.2375	2.61053	3.2268	2.99958	9.74482	9.97792	0.267889	0.0916	9.38865	9.44175	1373.69	1407.51	1459.11	5.85425	1377.98	38.6922	0.777391	0.37794	1377.98	38.6922	2.8079
UK033	UK033_72	164	4.17	0.2472	2.54854	3.17687	3.24479	5.93246	6.30805	0.429593	0.0952	5.35714	5.44968	1424.02	1467.93	1532.03	7.0504	1437.97	37.4267	3.23864	0.0719202	1437.97	37.4267	2.60275
UK033	UK033_24	422	2.24	0.2506	1.9154	2.69559	3.14775	4.00091	4.53924	0.478742	0.0911	3.51262	3.65219	1441.57	1444.45	1448.69	0.491786	1442.99	30.0265	0.0261308	0.871581	1442.99	30.0265	2.08085
UK033	UK033_102	224	1.463	0.2554	1.76194	2.58879	3.38764	4.42038	4.91296	0.398595	0.0962	4.05405	4.17557	1466.26	1501.54	1551.68	5.5048	1479.67	30.254	3.08537	0.0789995	1479.67	30.254	2.04464
UK033	UK033_23	119.7	1.998	0.2725	1.65138	2.51485	3.75723	5.17079	5.59772	0.319366	0.1	4.9	5.001	1553.48	1583.66	1624.08	4.34731	1562.71	31.4793	1.61519	0.203763	1562.71	31.4793	2.0144
UK033	UK033_143	206	1.086	0.2862	1.57233	2.46366	4.01716	4.23219	4.74434	0.371517	0.1018	3.92927	4.05453	1622.51	1637.67	1657.2	2.09299	1628.95	30.5756	0.531074	0.466155	1628.95	30.5756	1.87702
UK033	UK033_94	184.2	1.369	0.292	1.40411	2.35986	4.09454	4.08378	4.61245	0.343826	0.1017	3.83481	3.96305	1651.52	1653.22	1655.38	0.23319	1652.25	29.4067	0.00675774	0.934483	1652.25	29.4067	1.7798
UK033	UK033_57	236.5	2.887	0.2918	1.50788	2.42304	4.21244	3.93019	4.47703	0.383667	0.1047	3.62942	3.76466	1650.52	1676.45	1709.05	3.42492	1662.35	30.0886	1.66969	0.1963	1662.35	30.0886	1.81
UK033	UK033_107	287	3.148	0.293	1.33106	2.31714	4.31864	3.44784	4.06017	0.386056	0.1069	3.18054	3.33404	1656.5	1696.93	1747.22	5.19221	1676.43	28.2612	4.65804	0.0309085	1676.43	28.2612	1.6858
UK033	UK033_25	117.5	1.45	0.296	1.82432	2.63165	4.33429	5.04919	5.4856	0.36131	0.1062	4.7081	4.81313	1671.44	1699.91	1735.18	3.6734	1681.92	34.4178	1.40541	0.235819	1681.92	34.4178	2.04634
UK033	UK033_92	25.8	2.55	0.301	3.98671	4.41489	4.60671	11.5225	11.7203	0.345994	0.111	10.8108	10.857	1696.27	1750.48	1815.85	6.58569	1707.21	62.6457	1.20536	0.272253	1707.21	62.6457	3.66949
UK033	UK033_87	115.5	1.486	0.3108	1.99485	2.75261	4.63671	5.8063	6.18955	0.343567	0.1082	5.45287	5.5438	1744.64	1755.9	1769.33	1.3952	1748.5	37.7001	0.171218	0.679032	1748.5	37.7001	2.15614
UK033	UK033_53	142.8	1.566	0.3116	1.60462	2.4844	4.63575	4.12473	4.64874	0.389025	0.1079	3.79981	3.9292	1748.58	1755.73	1764.26	0.888782	1752.01	32.0736	0.113195	0.736535	1752.01	32.0736	1.83067
UK033	UK033_48	52.1	1.043	0.3097	2.87375	3.44323	4.85942	7.59458	7.89145	0.378395	0.1138	7.02988	7.10065	1739.23	1795.25	1860.96	6.54139	1755.56	48.4461	2.6993	0.100393	1755.56	48.4461	2.75959
UK033	UK033_111	404	2.48	0.312	1.3141	2.30744	4.65461	2.73881	3.47829	0.479808	0.1082	2.40296	2.60273	1750.54	1759.12	1769.33	1.0618	1756.38	27.1283	0.265344	0.606472	1756.38	27.1283	1.54456
UK033	UK033_44	38.9	0.165	0.313	3.51438	3.99353	4.6609	11.6537	11.8493	0.301569	0.108	11.1111	11.156	1755.45	1760.25	1765.95	0.594342	1756.38	58.2544	0.00925815	0.923346	1756.38	58.2544	3.31673
UK033	UK033_66	387	9.91	0.3139	1.24243	2.26739	4.73489	2.92754	3.62876	0.424395	0.1094	2.65082	2.83317	1759.87	1773.44	1789.45	1.65277	1768.19	27.3542	0.591483	0.441846	1768.19	27.3542	1.54701
UK033	UK033_29	552	3.279	0.3191	1.09683	2.19099	4.80013	2.4581	3.26185	0.446213	0.1091	2.19982	2.41644	1785.33	1784.92	1784.44	-0.0499341	1785.05	25.4668	0.000623382	0.980081	1785.05	25.4668	1.42667
UK033	UK033_74	247	2.567	0.3152	1.33249	2.31796	4.94138	3.3543	3.98104	0.397248	0.1137	3.07828	3.23663	1766.24	1809.35	1859.38	5.0087	1789.35	29.2172	5.06966	0.0243482	1789.35	29.2172	1.63284
UK033	UK033_4	298	2.079	0.3204	1.15481	2.22058	4.8241	3.23511	3.88115	0.356961	0.1092	3.02198	3.18314	1791.68	1789.11	1786.11	-0.311915	1790.27	27.6798	0.0181075	0.892957	1790.27	27.6798	1.54612
UK033	UK033_97	85.7	0.897	0.3194	2.34815	3.01848	4.91033	5.87118	6.25045	0.399946	0.1115	5.38117	5.47329	1786.8	1804.03	1824.01	2.04004	1793.68	41.6205	0.392231	0.531129	1793.68	41.6205	2.3204
UK033	UK033_110	400	3.229	0.3212	1.18306	2.23541	4.91143	2.87014	3.58261	0.412197	0.1109	2.61497	2.79965	1795.59	1804.22	1814.22	1.0268	1800.95	27.1383	0.235104	0.627765	1800.95	27.1383	1.50689
UK033	UK033_31	198.7	1.471	0.3206	1.49719	2.4164	4.94204	3.87845	4.43168	0.386029	0.1118	3.57782	3.71494	1792.66	1809.47	1828.88	1.98059	1801.09	31.4269	0.647962	0.420842	1801.09	31.4269	1.74488
UK033	UK033_108	453	2.527	0.3225	1.14729	2.21668	4.94465	2.60444	3.3735	0.440512	0.1112	2.33813	2.543	1801.93	1809.91	1819.12	0.945144	1807.3	26.3066	0.221485	0.63791	1807.3	26.3066	1.45558
UK033	UK033_157	338	1.788	0.3191	1.3162	2.30864	5.02012	3.09805	3.76767	0.424848	0.1141	2.80456	2.97751	1785.33	1822.72	1865.72	4.30847	1807.41	28.6413	4.16289	0.0413189	1807.41	28.6413	1.58466
UK033	UK033_70	166	1.762	0.3198	1.78236	2.60274	5.12373	3.95303	4.49709	0.450886	0.1162	3.5284	3.66737	1788.75	1840.05	1898.57	5.78408	1816.18	33.8745	6.09863	0.0135287	1816.18	33.8745	1.86515
UK033	UK033_40	84.5	0.579	0.3237	2.03892	2.78471	5.07463	5.16851	5.59561	0.39449	0.1137	4.74934	4.85348	1807.77	1831.87	1859.38	2.77524	1818.02	38.2085	0.909763	0.340177	1818.02	38.2085	2.10165
UK033	UK033_46	154.9	1.672	0.3227	1.70437	2.54996	5.13014	4.17944	4.69736	0.407798	0.1153	3.81613	3.94498	1802.9	1841.11	1884.58	4.3339	1821.55	33.8392	3.05521	0.0804786	1821.55	33.8392	1.85772
UK033	UK033_27	175.1	1.67	0.3243	1.51095	2.42495	5.08404	3.90974	4.45909	0.386457	0.1137	3.60598	3.74207	1810.69	1833.45	1859.38	2.61813	1822.08	31.8362	1.15943	0.281583	1822.08	31.8362	1.74724
UK033	UK033_78	167.9	1.714	0.3241	1.54273	2.44488	5.13899	4.61342	5.08734	0.334402	0.115	4.34783	4.46134	1809.72	1842.58	1879.88	3.73232	1822.92	33.4213	1.90544	0.167471	1822.92	33.4213	1.83339
UK033	UK033_113	198	1.349	0.3255	1.47465	2.4025	5.10285	4.30611	4.8104	0.342456	0.1137	4.04573	4.16749	1816.53	1836.58	1859.38	2.30411	1825.32	32.3606	0.779575	0.377271	1825.32	32.3606	1.77287
UK033	UK033_73	52.9	1.049	0.3306	2.69208	3.29313	4.95033	7.58411	7.88138	0.354962	0.1086	7.09024	7.16041	1841.29	1810.88	1776.06	-3.67245	1831.01	47.5134	0.793469	0.373053	1831.01	47.5134	2.59493
UK033	UK033_128	133	0.947	0.3286	1.82593	2.63276	5.08349	5.39839	5.80861	0.338236	0.1122	5.08021	5.1777	1831.59	1833.35	1835.35	0.20493	1832.26	36.8606	0.00444087	0.946868	1832.26	36.8606	2.01176
UK033	UK033_132	93.8	1.099	0.3266	2.4801	3.12223	5.17863	5.54238	5.94268	0.447479	0.115	4.95652	5.05639	1821.88	1849.11	1879.88	3.08548	1834.65	42.824	1.06374	0.302363	1834.65	42.824	2.33418
UK033	UK033_5	40.4	1.241	0.3295	2.88316	3.45109	5.07469	7.97036	8.25373	0.361735	0.1117	7.43062	7.4976	1835.96	1831.88	1827.26	-0.476052	1834.65	50.1163	0.0129107	0.909535	1834.65	50.1163	2.73165
UK033	UK033_35	44.9	1.117	0.3313	2.53547	3.16639	5.01562	7.37144	7.67695	0.343958	0.1098	6.92168	6.99354	1844.68	1821.96	1796.09	-2.70524	1837.23	45.8532	0.459862	0.497688	1837.23	45.8532	2.49578
UK033	UK033_136	122.8	1.737	0.3288	1.97689	2.73961	5.19085	6.09377	6.45998	0.324411	0.1145	5.76419	5.85029	1832.56	1851.12	1872.03	2.10826	1838.64	39.267	0.404809	0.524616	1838.64	39.267	2.13566
UK033	UK033_151	1424	16.85	0.3236	1.57602	2.46602	5.13999	2.47606	3.27541	0.636503	0.1152	1.90972	2.1557	1807.29	1842.74	1883.01	4.02165	1839.1	27.7694	5.55915	0.0183844	1839.1	27.7694	1.50995
UK033	UK033_11	124.2	1.986	0.3304	1.15012	2.21815	5.18422	4.2872	4.79349	0.268268	0.1138	4.13005	4.24939	1840.32	1850.03	1860.96	1.10928	1844.23	30.1725	0.174954	0.675746	1844.23	30.1725	1.63605
UK033	UK033_98	300	1.164	0.3302	1.30224	2.3007	5.24482	3.06788	3.7429	0.424476	0.1152	2.77778	2.9523	1839.35	1859.93	1883.01	2.31882	1852.01	28.7944	1.22851	0.267696	1852.01	28.7944	1.55476
UK033	UK033_32	233	2.331	0.3343	1.46575	2.39705	5.17167	3.28617	3.92382	0.446035	0.1122	2.94118	3.10653	1859.19	1847.97	1835.35	-1.29873	1852.06	30.2065	0.345324	0.556772	1852.06	30.2065	1.63097
UK033	UK033_28	91.5	2.08	0.3337	1.91789	2.69735	5.236	5.28145	5.7001	0.363137	0.1138	4.92091	5.02149	1856.29	1858.5	1860.96	0.251104	1857.2	37.7962	0.0071483	0.932621	1857.2	37.7962	2.03512
UK033	UK033_121	78	0.969	0.3329	2.01262	2.76551	5.35656	5.92231	6.2985	0.339837	0.1167	5.56984	5.65889	1852.42	1877.94	1906.28	2.82539	1861.3	39.7436	0.791834	0.373546	1861.3	39.7436	2.13526
UK033	UK033_60	71.3	1.338	0.3337	2.5472	3.17579	5.42464	6.46057	6.80708	0.394268	0.1179	5.93723	6.02086	1856.29	1888.76	1924.64	3.55112	1868.59	45.6275	1.13512	0.286685	1868.59	45.6275	2.44181
UK033	UK033_149	219.3	2.988	0.3381	1.27181	2.28362	5.25376	3.52079	4.1223	0.36123	0.1127	3.28305	3.43197	1877.52	1861.38	1843.4	-1.85084	1868.65	29.7017	0.623578	0.429721	1868.65	29.7017	1.58947
UK033	UK033_15	821	6.56	0.3367	1.3365	2.32027	5.297	2.79433	3.52217	0.47829	0.1141	2.45399	2.64992	1870.77	1868.38	1865.72	-0.271114	1869.08	28.2524	0.0185002	0.891809	1869.08	28.2524	1.51157
UK033	UK033_20	182	1.483	0.3384	1.32979	2.31641	5.33308	3.58067	4.17356	0.371379	0.1143	3.32458	3.47172	1878.97	1874.18	1868.88	-0.539965	1876.35	30.3269	0.0540314	0.816191	1876.35	30.3269	1.61627
UK033	UK033_59	108.9	0.962	0.3333	1.9502	2.72042	5.58358	5.15666	5.58467	0.37819	0.1215	4.77366	4.87728	1854.36	1913.57	1978.37	6.26842	1878.06	38.4515	5.21465	0.0223973	1878.06	38.4515	2.04741
UK033	UK033_156	307	8.2	0.3374	1.63011	2.50094	5.48014	2.81258	3.53667	0.579578	0.1178	2.29202	2.50067	1874.15	1897.49	1923.12	2.54619	1893.14	29.8383	1.90652	0.167351	1893.14	29.8383	1.57613
UK033	UK033_63	51.2	0.765	0.3423	2.57084	3.19478	5.42758	7.17224	7.48588	0.358444	0.115	6.69565	6.76992	1897.72	1889.22	1879.88	-0.949015	1894.74	47.0391	0.0650816	0.798637	1894.74	47.0391	2.48262
UK033	UK033_17	189.8	1.208	0.3402	1.38154	2.3465	5.52093	3.98543	4.5256	0.346648	0.1177	3.73832	3.86976	1887.63	1903.86	1921.59	1.76736	1895.48	31.8207	0.537649	0.463409	1895.48	31.8207	1.67876
UK033	UK033_95	165.1	1.905	0.3387	1.59433	2.47776	5.66003	4.11665	4.64157	0.387289	0.1212	3.79538	3.92491	1880.41	1925.29	1973.97	4.73934	1902.37	33.8261	4.02367	0.0448659	1902.37	33.8261	1.7781
UK033	UK033_103	168	1.774	0.3409	1.73071	2.56764	5.6451	4.35531	4.8545	0.39738	0.1201	3.99667	4.11987	1891	1923.01	1957.7	3.40741	1906.72	35.3246	1.91747	0.166136	1906.72	35.3246	1.85264
UK033	UK033_126	111.7	0.998	0.3475	1.98561	2.74592	5.53399	4.14316	4.6651	0.47925	0.1155	3.63636	3.77136	1922.65	1905.89	1887.7	-1.85158	1912.12	36.3951	0.580399	0.446156	1912.12	36.3951	1.90339
UK033	UK033_148	104.3	1.407	0.3477	1.92695	2.7038	5.53717	4.65954	5.1292	0.413549	0.1155	4.24242	4.35869	1923.61	1906.39	1887.7	-1.90226	1914.6	37.3059	0.511251	0.474598	1914.6	37.3059	1.9485
UK033	UK033_137	165.5	1.515	0.3464	1.6455	2.51099	5.58333	4.58277	5.05956	0.359062	0.1169	4.27716	4.3925	1917.39	1913.53	1909.36	-0.420455	1915.59	35.0584	0.0255229	0.873071	1915.59	35.0584	1.83017
UK033	UK033_47	141.6	1.794	0.3446	1.56703	2.46029	5.64935	4.17411	4.69261	0.375418	0.1189	3.8688	3.99595	1908.76	1923.66	1939.76	1.59805	1916.17	33.7439	0.430777	0.511608	1916.17	33.7439	1.761
UK033	UK033_10	39.8	0.611	0.3446	2.26349	2.9531	5.85366	7.33833	7.64516	0.308448	0.1232	6.98052	7.05178	1908.76	1954.39	2003.08	4.70861	1921.15	44.8482	1.70299	0.191897	1921.15	44.8482	2.33444
UK033	UK033_101	130.3	35.3	0.3444	2.4971	3.13575	5.72205	4.7719	5.23148	0.523292	0.1205	4.06639	4.18754	1907.8	1934.7	1963.64	2.84352	1924.72	42.0494	1.26972	0.259819	1924.72	42.0494	2.1847
UK033	UK033_3	431	4.24	0.3478	1.29385	2.29596	5.68742	2.84121	3.55948	0.455386	0.1186	2.52951	2.72	1924.08	1929.46	1935.24	0.576366	1927.8	28.6404	0.086608	0.768535	1927.8	28.6404	1.48565
UK033	UK033_42	101.1	2.065	0.3547	1.80434	2.61783	5.72201	4.56018	5.03912	0.395673	0.117	4.18803	4.30577	1957	1934.7	1910.89	-2.41303	1945.39	36.4761	0.859047	0.354006	1945.39	36.4761	1.875
UK033	UK033_99	441	3.172	0.3568	1.31726	2.30924	6.04122	2.63328	3.39582	0.500237	0.1228	2.28013	2.48978	1966.99	1981.81	1997.3	1.51774	1978.24	28.4385	0.703508	0.401607	1978.24	28.4385	1.43757
UK033	UK033_49	102.4	1.492	0.3608	1.82927	2.63508	5.9995	5.14543	5.5743	0.355513	0.1206	4.80929	4.91215	1985.96	1975.77	1965.12	-1.06082	1981.41	38.3204	0.147335	0.701095	1981.41	38.3204	1.934
UK033	UK033_84	453	1.48	0.3634	1.51348	2.42653	6.05777	2.431	3.24148	0.622577	0.1209	1.9024	2.14921	1998.27	1984.19	1969.55	-1.45826	1985.01	28.1625	0.739914	0.389688	1985.01	28.1625	1.41876
UK033	UK033_124	88.5	1.693	0.3634	2.00881	2.76274	6.43356	5.37399	5.78595	0.373801	0.1284	4.98442	5.08375	1998.27	2036.86	2076.18	3.75268	2014.83	40.968	1.94221	0.163429	2014.83	40.968	2.03332
UK033	UK033_112	118.3	1.671	0.3783	1.90325	2.68696	6.46262	4.10043	4.62719	0.464159	0.1239	3.63196	3.76711	2068.34	2040.83	2013.13	-2.7422	2050.4	37.0215	1.43037	0.231703	2050.4	37.0215	1.80557
UK033	UK033_67	128	1.818	0.3731	1.92978	2.70582	6.60528	4.62722	5.09986	0.417049	0.1284	4.20561	4.32286	2043.97	2060.05	2076.18	1.55147	2052.63	38.9464	0.414236	0.519827	2052.63	38.9464	1.89739
UK033	UK033_1	95.7	1.708	0.3724	1.98711	2.747	6.68018	5.02172	5.46032	0.395703	0.1301	4.61184	4.71901	2040.68	2070	2099.31	2.79281	2054.91	40.4613	1.22001	0.269359	2054.91	40.4613	1.96901
UK033	UK033_34	149.6	1.985	0.3789	1.84745	2.64773	6.55124	3.82502	4.385	0.482992	0.1254	3.34928	3.49538	2071.14	2052.81	2034.45	-1.80352	2058.53	35.8837	0.692548	0.405299	2058.53	35.8837	1.74317
UK033	UK033_119	158.5	1.142	0.3823	1.64792	2.51258	6.76816	4.01428	4.55103	0.410515	0.1284	3.66044	3.79457	2087.02	2081.57	2076.18	-0.521948	2083.79	35.4549	0.0553665	0.813975	2083.79	35.4549	1.70146
UK033	UK033_104	142.3	1.65	0.379	1.71504	2.5571	7.09644	4.06173	4.59293	0.422244	0.1358	3.68189	3.81527	2071.61	2123.6	2174.31	4.72331	2101.19	36.5159	4.97394	0.025732	2101.19	36.5159	1.73787
UK033	UK033_96	141	1.493	0.3877	1.80552	2.61865	7.12569	3.63144	4.2172	0.497191	0.1333	3.15079	3.30567	2112.15	2127.26	2141.89	1.38831	2122.92	35.5935	0.487268	0.485148	2122.92	35.5935	1.67663
UK033	UK033_6	104.9	1.929	0.4772	1.82313	2.63082	11.2907	3.8403	4.39833	0.474738	0.1716	3.37995	3.52478	2515.06	2547.43	2573.31	2.26369	2539.35	39.3698	1.64523	0.199609	2539.35	39.3698	1.55039
UK033	UK033_140	213	1.702	0.4748	1.20051	2.24469	11.3844	3.00998	3.69559	0.398842	0.1739	2.76021	2.93577	2504.58	2555.15	2595.54	3.50449	2541.2	32.5996	4.92569	0.0264602	2541.2	32.5996	1.28284
UK033	UK033_109	332	1.951	0.4825	1.07772	2.18149	11.3296	2.21729	3.08444	0.486053	0.1703	1.93776	2.18057	2538.15	2550.64	2560.59	0.876661	2549.19	28.4328	0.380801	0.537175	2549.19	28.4328	1.11537
UK033	UK033_118	378	8.44	0.4912	1.09935	2.19225	11.5677	2.12197	3.01665	0.51808	0.1708	1.81499	2.07224	2575.87	2570.07	2565.5	-0.40413	2570.48	28.0378	0.0838781	0.772109	2570.48	28.0378	1.09076
UK033	UK033_41	105.1	2.153	0.4905	1.79409	2.61078	11.5783	3.57809	4.17134	0.50141	0.1712	3.09579	3.2533	2572.84	2570.92	2569.41	-0.133484	2571.27	37.9527	0.00607388	0.93788	2571.27	37.9527	1.47603
UK033	UK033_26	80.5	1.627	0.502	1.99203	2.75056	11.8013	3.9421	4.48749	0.505322	0.1705	3.40176	3.5457	2622.39	2588.77	2562.56	-2.33471	2594.7	40.7201	1.63378	0.20118	2594.7	40.7201	1.56935
UK033	UK033_133	319	3.72	0.4986	1.76494	2.59084	12.0857	2.97031	3.66335	0.594195	0.1758	2.38908	2.58992	2607.78	2611.08	2613.64	0.224397	2611	34.3413	0.0218319	0.882535	2611	34.3413	1.31525
UK033	UK033_54	173.8	2.147	0.4956	1.59403	2.47757	12.1223	2.67008	3.42443	0.596997	0.1774	2.14205	2.36398	2594.86	2613.92	2628.71	1.28785	2613.7	32.1246	0.808085	0.368687	2613.7	32.1246	1.22908
UK033	UK033_125	53.9	1.537	0.5	2.8	3.38192	12.5333	5.03149	5.46931	0.556495	0.1818	4.18042	4.29836	2613.8	2645.23	2669.36	2.08153	2640.3	50.7757	1.05216	0.305011	2640.3	50.7757	1.9231
UK033	UK033_2	314	5.81	0.5062	1.02726	2.15701	12.7027	2.22886	3.09277	0.46089	0.182	1.97802	2.21643	2640.39	2657.86	2671.18	1.15281	2655.65	28.6841	0.688166	0.406789	2655.65	28.6841	1.08012
UK033	UK033_37	117.1	0.709	0.5039	1.76622	2.59171	12.9645	3.81029	4.37215	0.46354	0.1866	3.37621	3.52119	2630.53	2677.08	2712.42	3.01903	2665.69	39.677	3.22227	0.0726428	2665.69	39.677	1.48844
UK033	UK033_154	81.5	0.864	0.515	1.94175	2.71437	13.7685	4.1903	4.70702	0.463391	0.1939	3.71325	3.84555	2677.94	2733.91	2775.53	3.51598	2719.3	42.7955	4.09127	0.0431052	2719.3	42.7955	1.57377
UK033	UK033_50	69.8	0.4761	0.534	2.05993	2.80013	13.5917	4.41088	4.90441	0.46701	0.1846	3.90033	4.02648	2758.28	2721.69	2694.64	-2.36194	2729.95	44.1144	1.5837	0.208228	2729.95	44.1144	1.61594
UK033	UK033_116	276	1.181	0.5227	1.35833	2.33291	14.0032	2.59668	3.36752	0.523103	0.1943	2.21307	2.42852	2710.62	2749.92	2778.91	2.45724	2746.59	31.7984	3.16794	0.0750973	2746.59	31.7984	1.15774
UK033	UK033_51	105.2	1.746	0.5564	1.76132	2.58837	15.6425	3.81494	4.37621	0.46169	0.2039	3.38401	3.52867	2851.74	2855.21	2857.67	0.207719	2854.52	40.3516	0.0161354	0.89892	2854.52	40.3516	1.4136
UK033	UK033_144	65.3	1.95	0.545	4.0367	4.46008	16.1561	7.27016	7.57975	0.555242	0.215	6.04651	6.12865	2804.34	2886.08	2943.62	4.73132	2871.55	71.9067	3.64611	0.0562003	2871.55	71.9067	2.50411
UK033	UK033_12	93.3	2.059	0.577	1.7331	2.56925	17.6298	3.40696	4.02552	0.508695	0.2216	2.93321	3.09899	2936.5	2969.75	2992.35	1.86658	2965.96	38.3568	1.5949	0.206627	2965.96	38.3568	1.29323
UK033	UK033_9	602	1.17	0.0643	2.02177	2.77218	0.527508	5.43226	5.84011	0.372179	0.0595	5.04202	5.14023	401.723	430.155	585.44	31.381	404.096	10.6694	8.50706	0.00353772
UK033	UK033_18	334	2.582	0.183	1.36612	2.33745	2.02109	3.75309	4.3224	0.363998	0.0801	3.49563	3.63585	1083.34	1122.62	1199.45	9.6801	1095.41	21.3154	6.68552	0.00971991
UK033	UK033_39	76.5	1.241	0.3654	1.72414	2.56321	6.91232	5.24759	5.66874	0.328558	0.1372	4.95627	5.05614	2007.72	2100.24	2192.16	8.41352	2041.74	38.9224	10.9685	0.00092672
UK033	UK033_58	435	1.66	0.3051	1.21272	2.25124	4.68628	2.71017	3.45578	0.44747	0.1114	2.4237	2.62189	1716.55	1764.79	1822.38	5.80734	1746.71	26.5965	8.36474	0.00382571
UK033	UK033_61	699	3.685	0.1555	1.15756	2.22201	1.62518	3.00255	3.68954	0.385524	0.0758	2.77045	2.9454	931.721	979.996	1089.79	14.5048	947.688	17.518	16.1836	5.74905e-05
UK033	UK033_62	380	4.74	0.2762	2.31716	2.99444	4.44422	4.13735	4.65994	0.56006	0.1167	3.42759	3.57049	1572.2	1720.62	1906.28	17.5255	1647.02	36.5739	60.222	8.47414e-15
UK033	UK033_91	780	2.734	0.2787	1.32759	2.31515	3.96184	2.43131	3.24171	0.546039	0.1031	2.03686	2.26909	1584.81	1626.42	1680.66	5.70327	1614.39	25.2658	8.49386	0.00356346
UK033	UK033_105	487	1.494	0.0668	3.14371	3.67156	0.587622	10.2137	10.4363	0.307793	0.0638	9.71787	9.76918	416.848	469.348	735.007	43.2865	417.941	14.7964	7.49788	0.00617718
UK033	UK033_120	434	3.22	0.401	2.74314	3.335	8.68604	4.70227	5.16805	0.583366	0.1571	3.81922	3.94797	2173.64	2305.62	2424.69	10.3536	2273.55	46.904	26.7264	2.34394e-07
UK033	UK033_135	20.9	0.88	0.0875	6.05714	6.34716	1.14613	28.0307	28.1126	0.21609	0.095	27.3684	27.3867	540.735	775.413	1528.07	64.6133	538.603	32.8972	7.91039	0.00491517
UK033	UK033_141	806	2.998	0.2114	1.51372	2.42668	2.75738	2.864	3.5777	0.528532	0.0946	2.43129	2.62891	1236.27	1344.09	1520.12	18.6728	1286.38	24.1483	66.1728	4.13083e-16
Sample: Gething Formation		Lat 53.907269		Long -119.051416		Datum NAD83		Beam Diameter: 22 µm
Sample Details		U (ppm)1	U/Th	Final 206Pb/238U (2σ)			Final 207Pb/235U (2σ)			Error Correlation	Final 207Pb/206Pb (2σ)			Apparent Age (Ma)				Concordia Age (Internal + External Errors)				Accepted Ages2
Sample	Spot			206/238	Int. (%)3	I+E (%)4	207/235	Int. (%)3	I+E (%)4		207/206	Int. (%)3	I+E (%)4	206Pb/ 238U	207Pb/ 235U	207Pb/ 206Pb	Disc (%)5	Age (Ma)	± Ma	MSWD	Prob. Fit	Age (Ma)	2σ (Ma)	2σ (%)
UK035	UK035_101	2580	2.863	0.01813	2.09597	2.82675	0.121489	5.93779	6.31306	0.352989	0.0486	5.55556	5.64484	115.827	116.421	128.579	9.91759	115.862	3.22103	0.0329237	0.856015	115.862	3.22189	2.78079
UK035	UK035_107	263	1.697	0.01906	4.03987	4.46296	0.129823	19.2545	19.3735	0.209815	0.0494	18.8259	18.8525	121.712	123.939	166.86	27.057	121.728	5.37884	0.0404626	0.840579	121.728	5.37942	4.41922
UK035	UK035_15	292	2.153	0.02831	3.32038	3.82392	0.210783	18.8138	18.9356	0.176486	0.054	18.5185	18.5455	179.962	194.209	371.05	51.4991	180.032	6.78445	0.737135	0.39058	180.032	6.78544	3.76902
UK035	UK035_149	281	2.36	0.03108	2.54183	3.17148	0.239977	13.4565	13.6263	0.188892	0.056	13.2143	13.2521	197.304	218.402	452.368	56.3842	197.486	6.15823	2.51871	0.112503	197.486	6.15954	3.11897
UK035	UK035_38	266	3.05	0.0325	3.07692	3.61454	0.22988	16.8525	16.9883	0.18258	0.0513	16.5692	16.5993	206.176	210.1	254.333	18.9346	206.216	7.327	0.0609336	0.805026	206.216	7.3282	3.55364
UK035	UK035_8	274.8	1.708	0.0411	2.6764	3.28032	0.261243	13.9256	14.0897	0.192193	0.0461	13.6659	13.7025	259.648	235.668	2.85152	-9005.58	258.972	8.30917	2.75851	0.0967386	258.972	8.3108	3.20915
UK035	UK035_135	266	1.408	0.0436	3.21101	3.72934	0.265711	14.6106	14.7671	0.219772	0.0442	14.2534	14.2884	275.109	239.259	-99.5397	376.381	273.775	9.98226	5.57658	0.0182023	273.774	9.98376	3.64671
UK035	UK035_143	461	1.94	0.058	2.41379	3.06982	0.419045	8.737	8.99625	0.276273	0.0524	8.39695	8.45628	363.451	355.368	302.904	-19.9887	363.003	10.753	0.385024	0.534927	363.003	10.7553	2.96288
UK035	UK035_110	193	1.198	0.0588	2.72109	3.31689	0.445904	12.8372	13.015	0.21197	0.055	12.5455	12.5852	368.324	374.407	412.223	10.6495	368.466	11.8368	0.0921784	0.761426	368.466	11.8391	3.21307
UK035	UK035_157	851	11.84	0.06102	1.32743	2.31506	0.460215	5.9988	6.37048	0.221283	0.0547	5.85009	5.93494	381.826	384.407	399.981	4.53911	382.043	8.40967	0.0646024	0.799364	382.044	8.4129	2.20208
UK035	UK035_89	124.5	1.182	0.0617	2.91734	3.4797	0.451732	16.086	16.2282	0.181359	0.0531	15.8192	15.8508	385.956	378.492	333.072	-15.8775	385.809	12.9988	0.0877933	0.767001	385.809	13.0011	3.36981
UK035	UK035_74	391	21.9	0.0625	2.24	2.93513	0.471377	7.99832	8.28073	0.280059	0.0547	7.67824	7.74309	390.811	392.14	399.981	2.29257	390.889	11.0252	0.0103444	0.918989	390.889	11.0279	2.82123
UK035	UK035_18	249	4.27	0.0637	2.82575	3.40327	0.508533	11.409	11.6087	0.247677	0.0579	11.0535	11.0987	398.088	417.462	525.98	24.315	398.604	13.096	0.987768	0.320288	398.605	13.0984	3.28606
UK035	UK035_97	500	6.3	0.0697	3.01291	3.5602	0.551628	7.27357	7.58302	0.414228	0.0574	6.62021	6.69531	434.348	446.062	506.935	14.3187	435.299	14.8103	0.857682	0.354388	435.299	14.8127	3.40288
UK035	UK035_68	460	1.255	0.07	2.14286	2.86169	0.57427	7.53789	7.83691	0.284278	0.0595	7.22689	7.29575	436.156	460.773	585.44	25.4995	437.476	11.9696	3.00637	0.0829379	437.477	11.9726	2.73675
UK035	UK035_127	171.5	2.185	0.0713	2.38429	3.04668	0.55446	9.86688	10.0972	0.241646	0.0564	9.57447	9.62655	443.983	447.914	468.149	5.16213	444.151	12.9811	0.0482218	0.826187	444.151	12.984	2.92333
UK035	UK035_153	262	1.658	0.0715	2.0979	2.82818	0.530383	8.62339	8.88596	0.24328	0.0538	8.36431	8.42388	445.186	432.064	362.687	-22.7467	444.383	12.0233	0.740637	0.389457	444.383	12.0264	2.70631
UK035	UK035_118	105	1.505	0.0746	3.48525	3.96792	0.616122	14.45	14.6082	0.241194	0.0599	14.0234	14.059	463.81	487.414	599.964	22.6937	464.319	17.7152	0.719725	0.396234	464.319	17.7175	3.81581
UK035	UK035_154	50.6	2.169	0.0757	3.96301	4.3935	0.741064	17.3598	17.4917	0.228287	0.071	16.9014	16.931	470.405	563.026	957.413	50.8671	470.712	19.9286	5.78535	0.0161603	470.712	19.9309	4.23419
UK035	UK035_152	223.7	4.68	0.0771	2.20493	2.90846	0.561293	11.9476	12.1385	0.184549	0.0528	11.7424	11.7849	478.79	452.368	320.212	-49.5227	477.749	13.3139	1.48684	0.222708	477.748	13.3172	2.7875
UK035	UK035_128	155	2.27	0.0839	4.05244	4.47434	0.650129	14.4585	14.6166	0.28028	0.0562	13.879	13.915	519.36	508.558	460.278	-12.836	518.891	22.1945	0.147924	0.700528	518.89	22.1968	4.27775
UK035	UK035_44	505	1.581	0.0861	2.20674	2.90983	0.693294	7.19603	7.50868	0.30666	0.0584	6.84932	6.92193	532.431	534.777	544.801	2.27057	532.632	14.6416	0.0241401	0.876529	532.632	14.6452	2.74959
UK035	UK035_133	111.4	0.877	0.0912	2.63158	3.24386	0.671487	11.905	12.0965	0.221049	0.0534	11.6105	11.6535	562.63	521.616	345.831	-62.6894	560.389	17.2878	2.95821	0.0854427	560.388	17.2912	3.08557
UK035	UK035_100	758	5.49	0.0977	1.22825	2.25965	0.837888	4.51126	4.99488	0.272263	0.0622	4.34084	4.45453	600.916	617.98	680.992	11.7588	603.564	12.4423	2.13352	0.14411	603.565	12.4474	2.06231
UK035	UK035_111	96.1	0.724	0.0988	3.03644	3.58013	0.869118	10.9317	11.14	0.277763	0.0638	10.5016	10.5491	607.373	635.088	735.007	17.365	608.603	20.6214	1.15704	0.282079	608.603	20.6248	3.38887
UK035	UK035_124	384	1.398	0.1004	1.59363	2.47731	0.78906	5.83584	6.21727	0.273076	0.057	5.61404	5.7024	616.753	590.638	491.533	-25.4753	613.101	14.0657	3.6301	0.0567435	613.099	14.0703	2.29495
UK035	UK035_12	275	0.954	0.1025	2.43902	3.0897	0.822523	9.4275	9.66825	0.258714	0.0582	9.10653	9.16127	629.043	609.455	537.299	-17.0751	627.608	18.2512	0.829482	0.362422	627.607	18.2551	2.90868
UK035	UK035_81	567	0.968	0.1035	1.44928	2.38701	0.857662	5.67889	6.07019	0.255204	0.0601	5.49085	5.58117	634.888	628.846	607.177	-4.56388	634.105	13.9582	0.181437	0.670141	634.104	13.9631	2.20202
UK035	UK035_1	47.4	1.732	0.1035	3.86473	4.30506	1.08456	16.2556	16.3964	0.237748	0.076	15.7895	15.8211	634.888	745.86	1095.07	42.0231	635.954	26.0112	6.23769	0.012506	635.955	26.0142	4.09057
UK035	UK035_77	81.4	1.977	0.1063	3.66886	4.13013	0.935094	13.97	14.1336	0.262624	0.0638	13.4796	13.5167	651.224	670.311	735.007	11.3989	651.962	25.4442	0.316054	0.573989	651.963	25.4474	3.90319
UK035	UK035_155	138.6	1.025	0.1232	2.75974	3.34867	1.11943	9.65909	9.89421	0.285714	0.0659	9.25645	9.31031	748.956	762.703	803.201	6.75364	749.957	23.371	0.281083	0.595992	749.957	23.3753	3.11688
UK035	UK035_10	140.3	2.172	0.1289	3.33592	3.83742	1.1961	9.93771	10.1664	0.335683	0.0673	9.36107	9.41433	781.587	798.787	847.072	7.73068	783.079	27.846	0.403383	0.525348	783.079	27.8499	3.55646
UK035	UK035_136	520	3.4	0.1485	1.3468	2.32622	1.42098	4.25344	4.76331	0.316638	0.0694	4.03458	4.15666	892.55	897.773	910.653	1.98796	893.803	18.1014	0.13058	0.717832	893.803	18.1084	2.02599
UK035	UK035_93	213	2.073	0.1615	1.98142	2.74289	1.51642	7.46314	7.76504	0.265495	0.0681	7.1953	7.26446	965.107	937.035	871.599	-10.7283	961.206	23.7223	1.43548	0.230872	961.205	23.7286	2.46863
UK035	UK035_98	61.9	2.164	0.1633	3.24556	3.75913	1.4928	10.9016	11.1104	0.297715	0.0663	10.4072	10.4552	975.09	927.457	815.861	-19.5166	969.289	33.1208	2.16295	0.141373	969.288	33.1254	3.4175
UK035	UK035_56	84.9	3.75	0.1679	3.15664	3.68263	1.70616	10.3959	10.6147	0.303644	0.0737	9.90502	9.95537	1000.53	1010.84	1033.26	3.16802	1001.59	33.4374	0.096501	0.75607	1001.59	33.4424	3.33894
UK035	UK035_65	92.4	3.46	0.1714	2.68378	3.28635	1.68737	9.22265	9.46862	0.290999	0.0714	8.82353	8.88002	1019.82	1003.77	968.887	-5.25686	1017.85	30.15	0.296665	0.585981	1017.85	30.1556	2.96269
UK035	UK035_86	100.3	1.873	0.1725	2.37681	3.04083	1.68631	9.47093	9.71061	0.250959	0.0709	9.16784	9.22222	1025.87	1003.37	954.532	-7.47373	1023.46	28.1045	0.547343	0.459405	1023.46	28.1106	2.74662
UK035	UK035_31	226	3.349	0.1736	1.95853	2.7264	1.71142	6.72507	7.05861	0.291227	0.0715	6.43357	6.51082	1031.92	1012.82	971.742	-6.19232	1028.67	24.872	0.725484	0.394351	1028.67	24.8787	2.41852
UK035	UK035_41	674	2.72	0.1739	1.49511	2.41511	1.78391	3.67783	4.25721	0.406521	0.0744	3.36022	3.50586	1033.56	1039.61	1052.34	1.78407	1035.66	20.9258	0.186947	0.66547	1035.66	20.934	2.02132
UK035	UK035_26	42.9	1.882	0.1749	3.54488	4.0204	1.70736	13.6055	13.7734	0.260548	0.0708	13.1356	13.1736	1039.05	1011.29	951.645	-9.18494	1036.66	37.883	0.420847	0.516515	1036.66	37.8878	3.6548
UK035	UK035_91	38	0.714	0.1751	4.22616	4.63226	1.76242	16.9729	17.1078	0.248994	0.073	16.4384	16.4687	1040.15	1031.74	1013.95	-2.58367	1039.6	43.9361	0.02414	0.876529	1039.6	43.9403	4.22665
UK035	UK035_87	113.3	2.443	0.1753	2.2818	2.96716	1.7741	9.54117	9.77913	0.239153	0.0734	9.26431	9.31812	1041.25	1036.02	1025.02	-1.58335	1040.74	27.8735	0.0275342	0.868209	1040.74	27.8799	2.67885
UK035	UK035_90	47	1.144	0.1765	3.62606	4.09216	1.74488	13.468	13.6376	0.269235	0.0717	12.9707	13.0092	1047.83	1025.27	977.437	-7.2013	1045.81	38.8414	0.278683	0.597566	1045.81	38.8461	3.71447
UK035	UK035_150	451	2.65	0.1793	1.28277	2.28974	1.87639	4.65963	5.12928	0.275294	0.0759	4.47958	4.58984	1063.15	1072.79	1092.43	2.68069	1065.4	20.8616	0.298573	0.584779	1065.4	20.8696	1.95885
UK035	UK035_121	448	0.814	0.1846	1.30011	2.2995	1.96749	3.48569	4.09236	0.372985	0.0773	3.23415	3.38522	1092.06	1104.45	1128.94	3.26713	1096.48	20.6965	0.747561	0.387249	1096.48	20.7053	1.88835
UK035	UK035_52	71.2	1.593	0.1885	2.33422	3.00765	1.8895	9.90751	10.1369	0.235601	0.0727	9.62861	9.6804	1113.24	1077.41	1005.6	-10.7042	1109.31	29.8997	1.17417	0.278547	1109.31	29.9063	2.69594
UK035	UK035_5	598	2.855	0.1872	1.28205	2.28934	2.00553	3.46352	4.0735	0.370158	0.0777	3.2175	3.36932	1106.19	1117.38	1139.21	2.89883	1110.24	20.7823	0.602674	0.43756	1110.24	20.7913	1.87268
UK035	UK035_21	281	1.907	0.1902	1.57729	2.46683	1.95637	4.94973	5.39418	0.318662	0.0746	4.69169	4.79708	1122.46	1100.64	1057.74	-6.11809	1116.67	23.4847	1.40395	0.236063	1116.67	23.4925	2.10379
UK035	UK035_48	146	5.36	0.1956	2.81186	3.39175	1.93909	8.01955	8.30124	0.350626	0.0719	7.51043	7.57671	1151.64	1094.69	983.111	-17.1424	1139.25	33.8835	4.51336	0.0336312	1139.25	33.8894	2.97472
UK035	UK035_151	181.7	1.871	0.2	1.95	2.72028	2.21711	6.16243	6.5248	0.316434	0.0804	5.84577	5.93069	1175.32	1186.46	1206.82	2.60993	1177.57	27.7024	0.235317	0.627609	1177.57	27.7099	2.35314
UK035	UK035_122	102.8	1.796	0.2005	2.34414	3.01536	2.22818	7.92296	8.20796	0.295867	0.0806	7.56824	7.63402	1178.01	1189.95	1211.71	2.78143	1179.8	31.2935	0.173599	0.676933	1179.8	31.3004	2.65302
UK035	UK035_82	248	3.109	0.2034	1.52409	2.43316	2.17908	5.4924	5.89609	0.277491	0.0777	5.27671	5.37063	1193.56	1174.38	1139.21	-4.77051	1189.12	24.6834	0.834086	0.361094	1189.12	24.6916	2.07646
UK035	UK035_50	317	19.4	0.2048	3.51562	3.99463	2.31833	5.62023	6.01534	0.625531	0.0821	4.3849	4.49748	1201.05	1217.91	1247.9	3.75419	1209.87	39.0848	0.809397	0.368299	1209.86	39.0917	3.23108
UK035	UK035_126	222	1.396	0.2096	1.95611	2.72466	2.31486	4.90161	5.35007	0.399074	0.0801	4.49438	4.60429	1226.69	1216.85	1199.45	-2.27065	1223.47	27.811	0.269112	0.603928	1223.47	27.8189	2.27377
UK035	UK035_71	176.1	1.418	0.209	1.96172	2.72869	2.34282	5.75662	6.14297	0.340777	0.0813	5.41205	5.50367	1223.49	1225.38	1228.71	0.424666	1223.95	28.4578	0.00739631	0.931465	1223.95	28.4655	2.32571
UK035	UK035_88	433	4.04	0.2119	4.24729	4.65154	2.5068	5.72995	6.11799	0.741243	0.0858	3.84615	3.97403	1238.93	1274	1333.68	7.10428	1266.55	44.0845	3.88437	0.0487375	1266.54	44.0928	3.48136
UK035	UK035_30	121.3	2.925	0.2222	2.29523	2.9775	2.6409	6.02293	6.39321	0.381082	0.0862	5.56845	5.65752	1293.49	1312.11	1342.67	3.66301	1298.38	32.6163	0.629411	0.427571	1298.38	32.6237	2.51264
UK035	UK035_73	26.4	0.7	0.223	4.4843	4.86892	3.04398	14.8354	14.9895	0.302271	0.099	14.1414	14.1767	1297.71	1418.72	1605.37	19.1644	1306.56	56.5073	4.26939	0.0388048	1306.56	56.5122	4.32527
UK035	UK035_83	113.7	4.39	0.2269	2.3799	3.04325	2.63732	5.30835	5.72503	0.448332	0.0843	4.74496	4.84919	1318.23	1311.11	1299.49	-1.4426	1315.6	32.8982	0.118097	0.731108	1315.6	32.9059	2.50121
UK035	UK035_116	133.5	0.713	0.228	1.88596	2.67475	2.82615	6.40201	6.75152	0.29459	0.0899	6.11791	6.1991	1324.01	1362.5	1423.41	6.98308	1331.49	30.3417	2.19709	0.138271	1331.5	30.3501	2.2794
UK035	UK035_58	32.1	0.841	0.2331	3.8181	4.26325	2.80581	11.6405	11.8364	0.328	0.0873	10.9966	11.0419	1350.73	1357.09	1367.13	1.19955	1351.72	50.1472	0.0214067	0.883676	1351.72	50.1527	3.7103
UK035	UK035_123	128.8	1.925	0.2375	1.97895	2.7411	2.86204	6.05343	6.42195	0.326913	0.0874	5.72082	5.80757	1373.69	1371.98	1369.33	-0.318283	1373.25	31.5147	0.00482185	0.94464	1373.25	31.523	2.2955
UK035	UK035_62	104.5	2.219	0.2407	2.24346	2.93777	2.94707	7.54831	7.84693	0.297213	0.0888	7.20721	7.27625	1390.34	1394.09	1399.85	0.679654	1391.06	34.8491	0.0157053	0.90027	1391.06	34.8569	2.50577
UK035	UK035_37	144.4	5.23	0.2481	1.97501	2.73826	2.87347	5.37593	5.78775	0.36738	0.084	5	5.09902	1428.67	1374.98	1292.55	-10.5308	1409.54	31.4399	5.86793	0.0154192	1409.54	31.4483	2.2311
UK035	UK035_54	178	2.583	0.2458	1.95281	2.72229	3.04679	4.65621	5.12618	0.419398	0.0899	4.22692	4.3436	1416.78	1419.43	1423.41	0.465565	1417.82	30.845	0.0175737	0.894537	1417.82	30.854	2.17616
UK035	UK035_49	62.5	0.877	0.2471	2.83286	3.40918	3.09357	9.56987	9.80713	0.296019	0.0908	9.14097	9.19551	1423.5	1431.1	1442.41	1.31091	1424.74	41.7918	0.0408567	0.839815	1424.74	41.7988	2.93379
UK035	UK035_9	203	1.574	0.2517	1.74811	2.5794	3.14075	5.58452	5.982	0.313028	0.0905	5.30387	5.39732	1447.24	1442.73	1436.1	-0.775303	1445.97	30.6429	0.0357154	0.850104	1445.97	30.6519	2.11982
UK035	UK035_61	148.8	1.384	0.2486	2.25261	2.94477	3.33515	5.70507	6.09469	0.394844	0.0973	5.24152	5.33606	1431.25	1489.32	1573	9.01138	1448.01	35.0292	5.77246	0.0162792	1448.01	35.0375	2.41969
UK035	UK035_46	56.5	2.97	0.2592	3.27932	3.78832	3.13784	8.72619	8.98576	0.375802	0.0878	8.08656	8.14816	1485.75	1442.02	1378.11	-7.81039	1473.57	46.6853	1.66433	0.19702	1473.57	46.6917	3.16861
UK035	UK035_42	21.2	3.03	0.2583	3.67789	4.13815	3.49021	14.7516	14.9066	0.249322	0.098	14.2857	14.3207	1481.14	1525	1586.41	6.63596	1485.19	53.6172	0.545316	0.460238	1485.19	53.6235	3.61055
UK035	UK035_3	288	2.855	0.2588	1.5456	2.44669	3.32926	3.85993	4.41548	0.40042	0.0933	3.53698	3.67562	1483.7	1487.94	1493.98	0.6884	1485.59	27.9599	0.0533699	0.8173	1485.59	27.9704	1.88277
UK035	UK035_22	148.4	2.271	0.2595	2.23507	2.93137	3.32753	6.22177	6.58087	0.359233	0.093	5.80645	5.89193	1487.28	1487.53	1487.89	0.0406102	1487.36	35.8073	9.12831e-05	0.992377	1487.36	35.8156	2.408
UK035	UK035_7	72.9	1.847	0.2609	2.64469	3.25451	3.29152	8.82109	9.07795	0.299814	0.0915	8.4153	8.47451	1494.44	1479.05	1457.03	-2.56789	1491.42	41.1497	0.189892	0.663007	1491.42	41.1572	2.7596
UK035	UK035_132	244	1.127	0.264	4.54545	4.9253	3.54903	6.26238	6.61927	0.725835	0.0975	4.30769	4.42224	1510.27	1538.22	1576.84	4.22176	1534.95	52.3314	1.49244	0.221838	1534.94	52.3402	3.40991
UK035	UK035_85	24.5	1.617	0.279	4.30108	4.70071	3.65451	13.3438	13.5149	0.322328	0.095	12.6316	12.6711	1586.32	1561.49	1528.07	-3.81201	1581.58	62.9847	0.220092	0.63897	1581.58	62.9902	3.98273
UK035	UK035_20	371	6.58	0.2764	1.84515	2.64613	3.80719	3.19032	3.8439	0.57836	0.0999	2.6026	2.78811	1573.21	1594.27	1622.22	3.02151	1587.87	29.5775	1.77507	0.182756	1587.86	29.5912	1.86358
UK035	UK035_47	264.8	2.977	0.2809	1.92239	2.70056	3.81108	4.13285	4.65595	0.465149	0.0984	3.65854	3.79274	1595.89	1595.09	1594.02	-0.11738	1595.48	32.3522	0.00169918	0.96712	1595.48	32.3628	2.02841
UK035	UK035_29	63.9	1.117	0.2858	2.69419	3.29486	3.8618	7.15896	7.47316	0.376338	0.098	6.63265	6.70761	1620.51	1605.74	1586.41	-2.14916	1615.81	43.1117	0.236173	0.626984	1615.81	43.1195	2.66859
UK035	UK035_96	164	1.892	0.286	4.1958	4.60458	4.0735	6.55322	6.89508	0.640266	0.1033	5.03388	5.13225	1621.51	1649.01	1684.24	3.72472	1640.86	54.4618	1.09388	0.295613	1640.86	54.4697	3.31958
UK035	UK035_102	85.4	1.668	0.2912	2.09478	2.82587	4.01105	5.61091	6.00664	0.373341	0.0999	5.20521	5.30039	1647.52	1636.44	1622.22	-1.55966	1643.42	36.5991	0.191791	0.66143	1643.42	36.6082	2.22756
UK035	UK035_27	306	1.763	0.2922	1.64271	2.50916	4.12152	3.61999	4.20734	0.453789	0.1023	3.22581	3.37725	1652.51	1658.58	1666.27	0.825358	1655.87	30.2178	0.106623	0.744023	1655.87	30.2297	1.82561
UK035	UK035_125	27.7	0.97	0.307	3.25733	3.7693	4.48689	10.8766	11.0859	0.299481	0.106	10.3774	10.4254	1725.93	1728.55	1731.73	0.334826	1726.44	54.1209	0.00319897	0.954896	1726.44	54.1282	3.13525
UK035	UK035_112	745	3.4	0.3065	1.27243	2.28396	4.53452	2.65473	3.41248	0.479307	0.1073	2.32992	2.53545	1723.46	1737.33	1754.06	1.74447	1732.86	26.5123	0.725842	0.394234	1732.86	26.5278	1.53087
UK035	UK035_51	622	13.6	0.3126	1.37556	2.34298	4.56443	2.89698	3.60415	0.474825	0.1059	2.54958	2.73867	1753.49	1742.8	1729.99	-1.35811	1746.31	27.7334	0.391074	0.531735	1746.31	27.748	1.58895
UK035	UK035_120	132.7	1.21	0.3163	2.30794	2.9873	4.57484	5.29581	5.7134	0.435804	0.1049	4.76644	4.87021	1771.63	1744.7	1712.56	-3.44933	1758.52	39.5359	1.17411	0.278559	1758.52	39.5453	2.24878
UK035	UK035_119	293	2.001	0.3207	1.40318	2.35931	4.59426	3.12401	3.78904	0.449161	0.1039	2.79115	2.96488	1793.15	1748.23	1694.93	-5.79502	1763.78	28.5228	6.15837	0.0130792	1763.78	28.5365	1.61792
UK035	UK035_19	245	4.51	0.3151	1.39638	2.35527	4.70086	3.35437	3.98111	0.416287	0.1082	3.04991	3.20966	1765.75	1767.39	1769.33	0.20195	1766.69	29.2177	0.00752612	0.930868	1766.69	29.2307	1.65454
UK035	UK035_32	389	2.946	0.3181	1.22603	2.25844	4.65351	3.16858	3.82587	0.386933	0.1061	2.92177	3.08816	1780.44	1758.92	1733.46	-2.71067	1767.88	27.6922	1.33855	0.24729	1767.88	27.7056	1.56716
UK035	UK035_117	235	1.644	0.3185	1.69545	2.544	4.68132	3.94738	4.49213	0.429512	0.1066	3.56473	3.70234	1782.4	1763.91	1742.08	-2.31474	1772.17	32.4602	0.805618	0.369419	1772.17	32.4719	1.83232
UK035	UK035_137	364	2.03	0.3131	1.27755	2.28682	4.8437	2.88317	3.59306	0.443106	0.1122	2.58467	2.77138	1755.94	1792.52	1835.35	4.32668	1778.63	27.6159	4.41756	0.0355708	1778.62	27.6306	1.55348
UK035	UK035_138	212	2.802	0.3196	1.25156	2.2724	4.72392	4.38037	4.87699	0.285721	0.1072	4.19776	4.31523	1787.78	1771.49	1752.35	-2.0214	1781.13	30.2209	0.507575	0.476191	1781.13	30.2324	1.69737
UK035	UK035_28	200	3.115	0.3188	1.66248	2.52215	4.78243	3.95132	4.49559	0.420742	0.1088	3.58456	3.72143	1783.87	1781.82	1779.42	-0.249832	1782.77	32.4301	0.00974776	0.921352	1782.77	32.4418	1.81974
UK035	UK035_72	159.8	2.241	0.3199	1.56299	2.45771	4.83422	4.30812	4.81221	0.3628	0.1096	4.0146	4.13727	1789.24	1790.87	1792.77	0.19696	1789.99	32.5229	0.00535559	0.941661	1789.99	32.5342	1.81757
UK035	UK035_64	311	1.96	0.3222	2.32775	3.00263	4.82011	3.97797	4.51903	0.58516	0.1085	3.22581	3.37725	1800.46	1788.41	1774.38	-1.46989	1791.39	36.6021	0.369629	0.543206	1791.4	36.6147	2.04392
UK035	UK035_103	54	0.996	0.3205	2.34009	3.01222	4.86096	7.29463	7.60322	0.320797	0.11	6.90909	6.98108	1792.17	1795.52	1799.4	0.401926	1793.12	43.1878	0.0101893	0.919597	1793.12	43.1967	2.40902
UK035	UK035_144	322	3.06	0.3246	1.50955	2.42408	4.78888	3.35004	3.97746	0.450607	0.107	2.99065	3.15341	1812.15	1782.95	1748.94	-3.61476	1793.68	30.0391	2.39171	0.12198	1793.68	30.0524	1.67546
UK035	UK035_140	142	0.544	0.3212	2.24159	2.93635	4.88486	5.63295	6.02723	0.397943	0.1103	5.16772	5.26359	1795.59	1799.65	1804.36	0.486035	1797.28	40.2929	0.0232185	0.87889	1797.28	40.3023	2.24241
UK035	UK035_78	371	3.96	0.322	1.24224	2.26728	4.89259	2.82825	3.54914	0.439224	0.1102	2.54083	2.73054	1799.49	1800.98	1802.71	0.178518	1800.46	27.3279	0.00724957	0.932147	1800.46	27.3428	1.51866
UK035	UK035_53	84.1	0.604	0.3282	2.52895	3.16117	4.74243	6.08479	6.45151	0.415618	0.1048	5.53435	5.62397	1829.65	1774.77	1710.81	-6.94661	1804.25	43.3359	3.82241	0.0505715	1804.25	43.3447	2.40236
UK035	UK035_39	87.9	2.305	0.3222	2.2036	2.90745	4.97115	5.71452	6.10354	0.385614	0.1119	5.27256	5.36656	1800.46	1814.43	1830.5	1.64096	1805.99	40.2754	0.264908	0.606768	1805.99	40.2849	2.23063
UK035	UK035_113	1102	2.562	0.324	1.75926	2.58697	4.94978	2.39461	3.21427	0.734675	0.1108	1.62455	1.90766	1809.23	1810.79	1812.58	0.184402	1810.94	27.0072	0.012471	0.911082	1810.94	27.0286	1.49251
UK035	UK035_40	192.4	2.029	0.3295	1.97269	2.73659	4.94749	4.08864	4.61675	0.48248	0.1089	3.58127	3.71826	1835.96	1810.4	1781.1	-3.08022	1820.13	35.1524	1.46581	0.226008	1820.13	35.1641	1.93195
UK035	UK035_131	184	1.51	0.324	1.85185	2.6508	5.0838	4.05088	4.58334	0.457148	0.1138	3.60281	3.73902	1809.23	1833.41	1860.96	2.77969	1822.69	34.5102	1.3128	0.251887	1822.69	34.5219	1.89401
UK035	UK035_148	39.2	1.063	0.3324	2.43682	3.08796	4.76646	8.71308	8.97302	0.279674	0.104	8.36538	8.42494	1850	1779.01	1696.7	-9.0355	1831.57	45.6848	3.46708	0.0626019	1831.56	45.6936	2.49479
UK035	UK035_36	32.8	0.276	0.327	3.0581	3.59853	5.48706	8.69059	8.95118	0.351887	0.1217	8.13476	8.19599	1823.82	1898.57	1981.3	7.94799	1842.6	53.392	3.53337	0.0601455	1842.61	53.3999	2.89806
UK035	UK035_57	121.2	2.924	0.3348	1.6129	2.48975	5.0086	4.8824	5.33247	0.33035	0.1085	4.60829	4.71555	1861.6	1820.78	1774.38	-4.91563	1844.01	34.3155	2.74692	0.0974418	1844.01	34.3264	1.86151
UK035	UK035_13	138	1.77	0.3377	1.86556	2.6604	5.16839	4.70958	5.1747	0.396121	0.111	4.32432	4.43844	1875.6	1847.43	1815.85	-3.2901	1861.58	36.2626	1.38685	0.238937	1861.58	36.2734	1.94853
UK035	UK035_139	47.6	1.229	0.333	3.003	3.55182	5.41786	7.57025	7.86805	0.396685	0.118	6.94915	7.02074	1852.91	1887.68	1926.16	3.8029	1865.07	51.6739	1.00282	0.316629	1865.07	51.6819	2.77104
UK035	UK035_16	89.4	1.092	0.339	2.27139	2.95916	5.16492	5.96939	6.34279	0.380506	0.1105	5.52036	5.6102	1881.86	1846.85	1807.65	-4.10516	1866.94	41.9091	1.51913	0.217751	1866.94	41.9185	2.2453
UK035	UK035_63	194.7	2.452	0.3391	1.82837	2.63445	5.22722	4.17801	4.69608	0.437617	0.1118	3.75671	3.88753	1882.34	1857.06	1828.88	-2.92294	1867.85	34.9173	1.31808	0.250936	1867.85	34.929	1.87001
UK035	UK035_24	193.6	1.859	0.3437	1.57114	2.4629	5.51138	3.85962	4.41521	0.40707	0.1163	3.52537	3.66445	1904.44	1902.37	1900.11	-0.227967	1903.29	32.849	0.0093648	0.922908	1903.29	32.8614	1.72656
UK035	UK035_33	65.2	1.048	0.3444	2.78746	3.37155	5.60808	6.54991	6.89194	0.425571	0.1181	5.92718	6.01095	1907.8	1917.34	1927.67	1.03084	1912	48.5558	0.0952091	0.757656	1912	48.5644	2.53998
UK035	UK035_35	25.8	1.468	0.345	3.18841	3.7099	6.23149	9.69934	9.93351	0.328724	0.131	9.16031	9.21473	1910.68	2008.88	2111.41	9.50713	1932.13	57.8414	4.67236	0.0306517	1932.13	57.8494	2.99407
UK035	UK035_145	413	6.2	0.3581	1.25663	2.2752	5.91017	2.15801	3.04211	0.582311	0.1197	1.75439	2.01937	1973.16	1962.73	1951.75	-1.09718	1963.78	26.1976	0.433215	0.510416	1963.78	26.2183	1.33509
UK035	UK035_114	199	3.511	0.3597	1.61245	2.48946	6.0804	3.27871	3.91757	0.491795	0.1226	2.85481	3.02489	1980.75	1987.44	1994.4	0.684572	1985.46	32.1855	0.115981	0.733435	1985.46	32.2002	1.6218
UK035	UK035_17	320	2.353	0.361	1.52355	2.43282	6.13224	3.15236	3.81245	0.483304	0.1232	2.75974	2.93533	1986.91	1994.85	2003.08	0.807074	1992.51	31.3401	0.16792	0.681967	1992.51	31.3552	1.57366
UK035	UK035_156	25.1	0.545	0.363	3.58127	4.05252	6.70676	9.64477	9.88023	0.371317	0.134	8.95522	9.01088	1996.38	2073.51	2151.04	7.19007	2018.79	64.1392	2.88911	0.0891803	2018.8	64.1465	3.17746
UK035	UK035_43	81.3	0.781	0.3755	1.91744	2.69704	6.66848	5.03757	5.4749	0.380628	0.1288	4.65839	4.76451	2055.23	2068.46	2081.66	1.26963	2061.58	39.9025	0.245435	0.620308	2061.58	39.9136	1.93607
UK035	UK035_70	129.5	1.492	0.375	1.62667	2.49869	6.77336	4.43149	4.92295	0.36707	0.131	4.12214	4.2417	2052.88	2082.25	2111.41	2.77201	2067.44	36.3874	1.41519	0.234196	2067.44	36.3995	1.76061
UK035	UK035_95	72.9	1.186	0.3835	1.74707	2.57869	6.74181	5.01972	5.45848	0.348041	0.1275	4.70588	4.81096	2092.61	2078.12	2063.79	-1.39673	2085.8	38.5706	0.290275	0.590044	2085.8	38.5819	1.84974
UK035	UK035_45	169	2.676	0.4201	1.8567	2.65419	8.79277	3.72383	4.29701	0.4986	0.1518	3.22793	3.37928	2260.93	2316.74	2366.3	4.45288	2301.46	37.6879	5.88325	0.0152856	2301.45	37.7027	1.63821
UK035	UK035_55	183	1.744	0.4352	1.65441	2.51684	9.19282	3.42823	4.04353	0.482585	0.1532	3.00261	3.16475	2329.12	2357.4	2381.95	2.21824	2350.35	35.5421	1.5748	0.209511	2350.35	35.5578	1.51288
UK035	UK035_141	75.3	1.765	0.4786	2.06853	2.80646	10.9872	4.52456	5.0069	0.457179	0.1665	4.02402	4.14642	2521.16	2522.05	2522.76	0.0633952	2521.79	43.5562	0.0010114	0.97463	2521.79	43.5691	1.72771
UK035	UK035_69	38	1.34	0.492	3.04878	3.59061	11.5255	6.52426	6.86756	0.467299	0.1699	5.7681	5.85414	2579.32	2566.65	2556.66	-0.886518	2570.92	58.9723	0.119771	0.729283	2570.92	58.982	2.2942
UK035	UK035_60	99	1.198	0.5046	1.92231	2.7005	11.5632	4.62974	5.10215	0.41521	0.1662	4.21179	4.32888	2633.53	2569.71	2519.73	-4.51635	2589.74	43.1367	4.84461	0.0277326	2589.74	43.1495	1.66617
UK035	UK035_130	127.4	1.467	0.5097	1.47145	2.40054	12.8467	3.05784	3.73468	0.481207	0.1828	2.68053	2.86098	2655.35	2668.48	2678.44	0.862076	2666.34	34.4175	0.31387	0.575315	2666.33	34.4356	1.2915
UK035	UK035_76	161	1.618	0.5116	1.64191	2.50864	13.0286	3.40047	4.02002	0.482848	0.1847	2.9778	3.14123	2663.46	2681.73	2695.53	1.18996	2678.39	36.9499	0.550487	0.458119	2678.39	36.9667	1.38019
UK035	UK035_142	290	2.83	0.5234	1.28009	2.28824	13.0549	2.36621	3.19317	0.540989	0.1809	1.99005	2.22717	2713.58	2683.63	2661.14	-1.97077	2684.88	30.0263	1.95955	0.161562	2684.88	30.0485	1.11917
UK035	UK035_25	43.4	1.041	0.507	2.5641	3.18936	13.5686	5.66273	6.05507	0.452804	0.1941	5.04894	5.14702	2643.81	2720.08	2777.22	4.80365	2692.82	53.5752	5.17759	0.02288	2692.82	53.5865	1.98997
UK035	UK035_79	50.7	-7900	0.541	2.77264	3.35931	15.023	5.21687	5.64031	0.531477	0.2014	4.41907	4.5308	2787.63	2816.7	2837.58	1.76004	2811.72	52.7698	0.783463	0.376084	2811.72	52.7822	1.87722
UK035	UK035_11	42.4	0.536	0.574	2.78746	3.37155	16.9841	4.25535	4.76502	0.655048	0.2146	3.21528	3.3672	2924.22	2933.94	2940.61	0.557177	2934.7	45.4171	0.104303	0.746726	2934.7	45.4331	1.54814
UK035	UK035_2	408	2.526	0.506	2.37154	3.03671	14.5395	2.87853	3.58934	0.823873	0.2084	1.63148	1.91356	2639.53	2785.59	2893.14	8.766	2842.16	28.1306	48.6551	3.05167e-12
UK035	UK035_4	71.9	1.074	0.4054	2.14603	2.86406	7.04297	5.44109	5.84832	0.394412	0.126	5	5.09902	2193.86	2116.87	2042.89	-7.38968	2151.65	43.2621	7.15729	0.00746599
UK035	UK035_6	54.9	1.831	0.1671	4.8474	5.20525	2.0851	11.9651	12.1557	0.405128	0.0905	10.9392	10.9848	996.113	1143.91	1436.1	30.6378	1005.16	47.7103	12.8724	0.00033347
UK035	UK035_14	630	1.38	0.2382	2.85474	3.42739	3.25803	3.80799	4.37015	0.749672	0.0992	2.52016	2.71131	1377.33	1471.09	1609.13	14.405	1459.29	34.1653	44.6647	2.33831e-11
UK035	UK035_23	270	2.438	0.03069	2.89997	3.46514	0.317365	13.6451	13.8125	0.212529	0.075	13.3333	13.3708	194.865	279.874	1068.5	81.7627	194.335	6.64841	24.3776	7.91854e-07
UK035	UK035_34	143.7	1.575	0.1996	2.60521	3.2225	1.96224	7.61254	7.90874	0.342226	0.0713	7.15288	7.22244	1173.17	1102.65	966.027	-21.4429	1156.84	32.5302	7.50072	0.00616743
UK035	UK035_59	93	1.87	0.1707	2.57762	3.20024	2.04293	8.79628	9.05384	0.293035	0.0868	8.41014	8.46938	1015.97	1129.94	1356.06	25.0794	1024.14	29.7004	13.0549	0.000302493
UK035	UK035_66	601	2.54	0.1505	4.65116	5.02302	1.54595	6.24082	6.59888	0.745281	0.0745	4.16107	4.27955	903.766	948.877	1055.04	14.3386	927.86	39.1006	9.18197	0.0024441
UK035	UK035_67	597	1.946	0.1681	2.02261	2.77279	3.50446	3.48981	4.09588	0.579574	0.1512	2.84392	3.01461	1001.63	1528.22	2359.54	57.5496	938.661	25.6494	951.391	6.61514e-209
UK035	UK035_75	185	0.838	0.3093	1.74588	2.57789	4.84035	3.85422	4.41049	0.452978	0.1135	3.43612	3.57868	1737.26	1791.94	1856.19	6.4074	1766.11	32.8676	7.41353	0.00647354
UK035	UK035_80	712	4.19	0.205	6.34146	6.61903	3.27031	6.85108	7.17877	0.925615	0.1157	2.59291	2.77906	1202.12	1474.02	1890.81	36.4228	1734.07	34.7735	320.027	1.42932e-71
UK035	UK035_84	1150	3.3	0.0434	2.76498	3.35298	0.352457	6.70838	7.04271	0.412168	0.0589	6.11205	6.19332	273.873	306.568	563.402	51.3893	274.905	8.9726	14.3093	0.000155095
UK035	UK035_92	230.2	4.64	0.195	11.7949	11.9464	2.6564	13.1302	13.3042	0.898299	0.0988	5.76923	5.85526	1148.4	1316.42	1601.59	28.2962	1409.61	84.3553	35.1956	2.98192e-09
UK035	UK035_94	139.9	1.399	0.1047	2.76982	3.35698	1.04517	10.4564	10.674	0.264892	0.0724	10.0829	10.1323	641.894	726.487	997.206	35.6308	644.351	20.4381	9.18045	0.00244613
UK035	UK035_99	520	5.25	0.1518	1.71278	2.55559	2.42999	4.1589	4.67909	0.411835	0.1161	3.78984	3.91955	911.046	1251.52	1897.02	51.9749	923.153	21.6333	354.633	4.15114e-79
UK035	UK035_104	704	5.46	0.441	2.49433	3.13354	11.8144	2.93354	3.6336	0.850281	0.1943	1.544	1.83955	2355.12	2589.81	2778.91	15.2502	2698.4	25.9231	161.754	4.68106e-37
UK035	UK035_105	3290	1.77	0.0156	7.69231	7.92269	0.12712	10.3585	10.5781	0.742606	0.0591	6.93739	7.0091	99.7877	121.506	570.782	82.5174	96.45	7.74444	27.3288	1.71635e-07
UK035	UK035_106	704	44.4	0.1627	3.87216	4.31173	1.72062	4.89753	5.34633	0.790635	0.0767	2.9987	3.16104	971.764	1016.25	1113.4	12.7211	1005.34	34.1921	13.6771	0.000217084
UK035	UK035_108	519	2.158	0.264	3.78788	4.23621	3.93487	4.48697	4.97296	0.844195	0.1081	2.40518	2.60478	1510.27	1620.88	1767.64	14.5598	1658.06	37.4173	50.009	1.53044e-12
UK035	UK035_109	209	1.866	0.2805	1.92513	2.70251	4.22335	4.13808	4.66059	0.465223	0.1092	3.663	3.79705	1593.88	1678.57	1786.11	10.7626	1632.5	33.3124	18.0074	2.20044e-05
UK035	UK035_115	145	1.167	0.1288	5.59006	5.90307	1.82917	12.0542	12.2434	0.463745	0.103	10.6796	10.7263	781.016	1055.98	1678.87	53.4797	771.964	43.3987	45.6048	1.44689e-11
UK035	UK035_129	937	14	0.1264	6.09177	6.38021	1.47267	7.11116	7.42738	0.85665	0.0845	3.66864	3.80249	767.295	919.224	1304.09	41.1623	792.623	45.7841	147.6	5.80072e-34
UK035	UK035_134	511	3.25	0.2938	1.59973	2.48124	4.81249	2.57689	3.35228	0.620799	0.1188	2.0202	2.25416	1660.49	1787.08	1938.25	14.3306	1757.6	28.1957	76.5907	2.10332e-18
UK035	UK035_146	88.5	1.137	0.2643	2.19448	2.90054	4.09969	5.52149	5.9232	0.397443	0.1125	5.06667	5.16441	1511.8	1654.24	1840.19	17.8452	1548.87	36.6072	32.0866	1.47452e-08
UK035	UK035_147	324	3.33	0.2672	2.43263	3.08466	3.98994	4.045	4.57815	0.601393	0.1083	3.23176	3.38294	1526.57	1632.15	1771.01	13.8023	1589.03	35.8043	34.9372	3.40514e-09
UK035	UK035_158	167	1.636	0.2938	2.48468	3.12587	4.48841	5.07259	5.50713	0.489826	0.1108	4.42238	4.53403	1660.49	1728.83	1812.58	8.39059	1692.32	40.0666	8.61475	0.00333452
Sample: Bluesky Formation		Lat 54.013114		Long -119.090255		Datum NAD83		Beam Diameter: 22 µm
Sample Details		U (ppm)1	U/Th	Final 206Pb/238U (2σ)			Final 207Pb/235U (2σ)			Error Correlation	Final 207Pb/206Pb (2σ)			Apparent Age (Ma)				Concordia Age (Internal + External Errors)				Accepted Ages2
Sample	Spot			206/238	Int. (%)3	I+E (%)4	207/235	Int. (%)3	I+E (%)4		207/206	Int. (%)3	I+E (%)4	206Pb/ 238U	207Pb/ 235U	207Pb/ 206Pb	Disc (%)5	Age (Ma)	± Ma	MSWD	Prob. Fit	Age (Ma)	2σ (Ma)	2σ (%)
UK034	UK034_52	2060	4.93	0.01414	1.83876	2.09309	0.0959215	8.93117	9.04244	0.205881	0.0492	8.73984	8.79686	90.5139	93.0045	157.373	42.4845	90.5307	1.88054	0.399937	0.527122	90.5307	1.88054	2.07724
UK034	UK034_6	1176	1.975	0.0177	1.86441	2.11566	0.118363	9.66605	9.76895	0.192882	0.0485	9.48454	9.53711	113.103	113.587	123.73	8.58838	113.107	2.37068	0.00879597	0.925278	113.107	2.37068	2.09595
UK034	UK034_123	2079	2.158	0.0178	3.48315	3.62385	0.13793	14.1369	14.2074	0.246387	0.0562	13.7011	13.7375	113.737	131.198	460.278	75.2895	113.665	4.08495	4.17298	0.0410734	113.665	4.08495	3.59385
UK034	UK034_8	1045	2.358	0.01803	1.94121	2.18364	0.125045	11.4971	11.5837	0.168844	0.0503	11.332	11.376	115.193	119.635	208.88	44.8519	115.212	2.4925	0.473014	0.491604	115.212	2.4925	2.16341
UK034	UK034_102	1526	2.102	0.0189	3.59788	3.73427	0.148538	19.6308	19.6816	0.183278	0.057	19.2982	19.3241	120.7	140.62	491.533	75.4441	120.651	4.46492	2.4106	0.120516	120.651	4.46492	3.70069
UK034	UK034_83	488	1.846	0.0192	4.375	4.48783	0.118599	16.441	16.5017	0.266103	0.0448	15.8482	15.8797	122.598	113.801	-66.5181	284.308	122.472	5.44461	1.06263	0.302617	122.472	5.44461	4.4456
UK034	UK034_27	1117	1.423	0.02181	4.2641	4.37979	0.149757	9.45042	9.55565	0.451207	0.0498	8.43373	8.49281	139.085	141.697	185.669	25.0898	139.123	6.02409	0.213846	0.64377	139.123	6.02409	4.33004
UK034	UK034_12	543.9	2.225	0.03069	1.98762	2.225	0.233581	9.27348	9.3807	0.214334	0.0552	9.05797	9.113	194.865	213.15	420.333	53.6402	194.947	4.27008	4.23107	0.0396905	194.947	4.27008	2.19037
UK034	UK034_103	277	1.13	0.0472	2.9661	3.13014	0.344921	15.0129	15.0794	0.19757	0.053	14.717	14.7509	297.308	300.894	328.797	9.57691	297.337	9.08956	0.0345385	0.852566	297.337	9.08956	3.05699
UK034	UK034_89	762	4.35	0.05239	1.73697	2.00426	0.392238	7.38937	7.52348	0.235064	0.0543	7.18232	7.2516	329.178	336.003	383.513	14.1676	329.311	6.41888	0.42118	0.516349	329.311	6.41888	1.94919
UK034	UK034_51	965	1.407	0.0673	2.22883	2.44288	0.540985	8.19898	8.32005	0.271842	0.0583	7.89022	7.95334	419.868	439.074	541.054	22.3981	420.258	9.91214	1.77108	0.183249	420.258	9.91214	2.35859
UK034	UK034_32	187.4	1.499	0.0882	2.26757	2.47828	0.750335	9.04101	9.15095	0.25081	0.0617	8.75203	8.80897	544.883	568.419	663.727	17.9055	545.421	12.9168	1.44929	0.228642	545.421	12.9168	2.36823
UK034	UK034_54	65.3	1.533	0.0957	3.86625	3.99348	0.831292	19.436	19.4874	0.198922	0.063	19.0476	19.0739	589.16	614.329	708.231	16.8124	589.453	22.4598	0.318345	0.572604	589.453	22.4598	3.81028
UK034	UK034_91	203	0.683	0.0974	2.25873	2.47019	0.793684	8.43006	8.54786	0.267937	0.0591	8.12183	8.18316	599.154	593.26	570.782	-4.97074	598.917	14.055	0.100964	0.750676	598.917	14.055	2.34674
UK034	UK034_92	58.8	1.065	0.0989	3.74115	3.8725	0.845453	18.1321	18.1872	0.206328	0.062	17.7419	17.7701	607.959	622.15	674.109	9.81287	608.176	22.4302	0.115544	0.733918	608.176	22.4302	3.68811
UK034	UK034_84	559	10.3	0.0991	2.62361	2.80773	0.931879	10.5939	10.6879	0.247652	0.0682	10.2639	10.3125	609.132	668.622	874.638	30.3561	610.024	16.2985	5.17981	0.0228509	610.024	16.2985	2.67179
UK034	UK034_113	364	0.904	0.1007	1.58888	1.87737	0.877501	6.37216	6.5272	0.249347	0.0632	6.17089	6.25139	618.51	639.632	714.968	13.4912	619.306	11.011	1.92164	0.165675	619.306	11.011	1.77796
UK034	UK034_24	248	1.591	0.1022	2.15264	2.37358	0.831389	10.0634	10.1623	0.213907	0.059	9.83051	9.88124	627.289	614.382	567.096	-10.6142	626.91	14.125	0.319403	0.571966	626.91	14.125	2.25312
UK034	UK034_74	467	3.858	0.1022	1.46771	1.776	0.897618	5.23357	5.42127	0.280442	0.0637	5.02355	5.12211	627.289	650.454	731.685	14.2679	628.471	10.5339	3.30856	0.0689197	628.471	10.5339	1.67612
UK034	UK034_105	216	1.487	0.1024	2.05078	2.2816	0.896551	7.37738	7.51171	0.277982	0.0635	7.08661	7.15682	628.458	649.883	725.019	13.3183	629.263	13.5965	1.48465	0.223048	629.263	13.5965	2.1607
UK034	UK034_100	36.8	2.15	0.1153	5.29055	5.38423	0.890264	20.3429	20.392	0.260069	0.056	19.6429	19.6683	703.455	646.511	452.368	-55.5048	700.543	35.5863	1.52064	0.217522	700.543	35.5863	5.07981
UK034	UK034_25	306	1.143	0.1413	1.76929	2.03233	1.39105	6.54615	6.69717	0.270279	0.0714	6.30252	6.38136	852.009	885.141	968.887	12.0631	853.811	16.076	2.87959	0.0897086	853.811	16.076	1.88286
UK034	UK034_64	45.2	2.84	0.1538	3.57607	3.71326	1.63286	15.9894	16.0519	0.223652	0.077	15.5844	15.6165	922.229	982.962	1121.19	17.7455	923.671	31.8092	1.42396	0.232752	923.671	31.8092	3.44378
UK034	UK034_14	1312	17.86	0.1703	1.11568	1.49824	1.76342	2.52366	2.8929	0.442088	0.0751	2.26365	2.47469	1013.76	1032.11	1071.18	5.36	1018.3	13.3325	4.21702	0.0400204	1018.3	13.3325	1.30929
UK034	UK034_58	112.9	1.633	0.1718	2.09546	2.32184	1.80975	8.12815	8.25027	0.257803	0.0764	7.8534	7.91681	1022.02	1048.99	1105.57	7.5572	1023.6	21.7161	1.02118	0.312239	1023.6	21.7161	2.12155
UK034	UK034_93	147	2.684	0.174	2.06897	2.29796	1.68658	7.68078	7.80989	0.269369	0.0703	7.39687	7.46416	1034.11	1003.47	937.128	-10.3491	1031.48	21.5734	1.6245	0.202465	1031.48	21.5734	2.09149
UK034	UK034_55	309	1.751	0.1807	1.38351	1.70707	1.92094	4.37497	4.59787	0.316233	0.0771	4.15045	4.26922	1070.8	1088.39	1123.78	4.71444	1073.05	16.3858	1.35954	0.243618	1073.05	16.3858	1.52702
UK034	UK034_72	413	2.626	0.1873	1.76188	2.02589	1.96786	4.43337	4.65347	0.397413	0.0762	4.06824	4.18934	1106.73	1104.58	1100.33	-0.581846	1106.32	19.8154	0.0208686	0.885137	1106.32	19.8154	1.7911
UK034	UK034_17	635	3.339	0.1877	1.01225	1.4229	2.04194	3.44728	3.72609	0.293638	0.0789	3.29531	3.4437	1108.9	1129.61	1169.63	5.19172	1112.08	13.9545	2.64543	0.103848	1112.08	13.9545	1.25481
UK034	UK034_117	366	1.696	0.2129	1.50305	1.80532	2.44818	4.00942	4.25152	0.37488	0.0834	3.71703	3.84919	1244.25	1256.89	1278.59	2.68609	1246.78	19.5198	0.714483	0.39796	1246.78	19.5198	1.56561
UK034	UK034_21	218	2.7	0.2394	1.50376	1.8059	2.80902	4.82325	5.02631	0.311773	0.0851	4.58284	4.69068	1383.58	1357.95	1317.82	-4.98997	1378.91	21.4679	1.91677	0.166213	1378.91	21.4679	1.55688
UK034	UK034_44	248.9	1.104	0.2417	1.5722	1.86328	2.94265	4.05449	4.29406	0.387767	0.0883	3.73726	3.86873	1395.53	1392.96	1389.02	-0.468635	1394.89	21.9983	0.0260998	0.871657	1394.89	21.9983	1.57707
UK034	UK034_65	162	2.36	0.2501	1.87925	2.12875	3.33803	5.78874	5.95898	0.324639	0.0968	5.47521	5.56578	1438.99	1489.99	1563.35	7.95447	1446.37	26.5833	4.80013	0.0284576	1446.37	26.5833	1.83793
UK034	UK034_13	138.1	1.095	0.2575	1.6699	1.94643	3.35159	4.85153	5.05345	0.344201	0.0944	4.55508	4.66356	1477.04	1493.16	1516.13	2.57836	1480.23	24.4822	0.675945	0.410986	1480.23	24.4822	1.65395
UK034	UK034_82	164	1.281	0.2705	1.55268	1.84684	3.64014	4.86508	5.06645	0.319148	0.0976	4.61066	4.71785	1543.34	1558.35	1578.76	2.24376	1546.19	24.1465	0.551948	0.457523	1546.19	24.1465	1.56168
UK034	UK034_50	111	1.18	0.2797	2.7172	2.89537	3.65982	5.9281	6.09446	0.458359	0.0949	5.2687	5.36276	1589.85	1562.65	1526.09	-4.1781	1580.16	37.3055	1.35438	0.244514	1580.16	37.3055	2.36086
UK034	UK034_36	293.9	2.603	0.2856	2.17087	2.39012	4.02449	5.08546	5.27843	0.426878	0.1022	4.59883	4.70629	1619.5	1639.16	1664.46	2.70076	1625.39	31.7845	0.869829	0.351003	1625.39	31.7845	1.9555
UK034	UK034_115	297	2.968	0.2856	1.5056	1.80744	4.0678	3.88537	4.13475	0.387505	0.1033	3.5818	3.71878	1619.5	1647.87	1684.24	3.84379	1627.47	24.0422	2.81066	0.0936401	1627.47	24.0422	1.47727
UK034	UK034_53	103.1	1.523	0.2878	2.11953	2.34359	4.18247	6.4314	6.58505	0.329559	0.1054	6.07211	6.1539	1630.53	1670.59	1721.3	5.27376	1637.52	32.3769	2.194	0.138549	1637.52	32.3769	1.97718
UK034	UK034_10	90.9	1.525	0.29	2	2.23607	4.25842	6.78055	6.92646	0.294962	0.1065	6.47887	6.55559	1641.53	1685.36	1740.36	5.67849	1647.85	31.2963	2.32501	0.127309	1647.85	31.2963	1.89922
UK034	UK034_49	126.1	2.402	0.3063	1.56709	1.85897	4.502	4.32748	4.5527	0.362126	0.1066	4.03377	4.15588	1722.47	1731.34	1742.08	1.12518	1724.91	26.0514	0.215889	0.64219	1724.91	26.0514	1.5103
UK034	UK034_4	263	0.997	0.3108	1.31918	1.65536	4.68813	3.80115	4.0557	0.347047	0.1094	3.5649	3.7025	1744.64	1765.12	1789.45	2.50373	1750.33	23.3685	1.38857	0.238646	1750.33	23.3685	1.33509
UK034	UK034_98	930	17.6	0.3094	1.0989	1.48579	4.70541	2.35706	2.74877	0.466217	0.1103	2.08522	2.31261	1737.75	1768.2	1804.36	3.69124	1752.05	19.6657	6.61889	0.0100903	1752.05	19.6657	1.12244
UK034	UK034_57	83.1	1.738	0.3118	2.08467	2.31211	4.70751	6.29149	6.44847	0.331348	0.1095	5.93607	6.01971	1749.56	1768.58	1791.11	2.31985	1753.49	33.5877	0.492568	0.482784	1753.49	33.5877	1.91548
UK034	UK034_81	485	3.927	0.3112	0.996144	1.41149	4.69845	2.24252	2.65121	0.444207	0.1095	2.00913	2.24424	1746.61	1766.96	1791.11	2.48451	1756.09	18.6775	3.09314	0.0786228	1756.09	18.6775	1.06358
UK034	UK034_20	449	2.956	0.3125	0.992	1.40857	4.69654	2.75369	3.09562	0.360243	0.109	2.56881	2.75659	1753	1766.62	1782.77	1.67	1757.84	19.3244	1.00465	0.316189	1757.84	19.3244	1.09933
UK034	UK034_56	614	3.221	0.312	0.897436	1.34365	4.72344	2.36285	2.75374	0.37981	0.1098	2.18579	2.40368	1750.54	1771.41	1796.09	2.53606	1758.89	18.0909	2.90365	0.088379	1758.89	18.0909	1.02854
UK034	UK034_76	110	1.147	0.3144	2.00382	2.23948	4.63406	5.78384	5.95422	0.346451	0.1069	5.42563	5.51702	1762.32	1755.42	1747.22	-0.864202	1760.64	32.3422	0.0771788	0.781158	1760.64	32.3422	1.83696
UK034	UK034_16	290	5.35	0.3113	1.54192	1.8378	4.78581	3.33721	3.6245	0.462038	0.1115	2.95964	3.12402	1747.1	1782.41	1824.01	4.21642	1761.53	25.1267	5.32473	0.0210249	1761.53	25.1267	1.42641
UK034	UK034_106	126.5	5.08	0.3171	1.79754	2.05698	4.64325	4.51626	4.73251	0.398015	0.1062	4.14313	4.2621	1775.55	1757.08	1735.18	-2.32643	1769.34	29.0547	0.87182	0.350452	1769.34	29.0547	1.64212
UK034	UK034_48	441	2.807	0.315	1.20635	1.56693	4.7428	2.75112	3.09333	0.438494	0.1092	2.47253	2.66709	1765.26	1774.83	1786.11	1.16715	1769.42	21.243	0.516142	0.472492	1769.42	21.243	1.20057
UK034	UK034_78	52.9	0.923	0.3157	2.24897	2.46127	4.89263	6.62139	6.77073	0.339652	0.1124	6.22776	6.30753	1768.7	1800.99	1838.58	3.80097	1775.4	36.1199	1.26592	0.260534	1775.4	36.1199	2.03447
UK034	UK034_11	602	2.74	0.3164	1.26422	1.61191	4.78133	2.60793	2.9667	0.48476	0.1096	2.28102	2.49059	1772.12	1781.62	1792.77	1.15173	1776.85	21.5347	0.56199	0.45346	1776.85	21.5347	1.21196
UK034	UK034_121	285	2.43	0.3192	1.31579	1.65267	4.6828	4.07184	4.31044	0.323144	0.1064	3.85338	3.98103	1785.82	1764.17	1738.63	-2.71408	1779.86	23.7355	1.3894	0.238507	1779.86	23.7355	1.33356
UK034	UK034_87	692	9.99	0.3203	1.18639	1.55162	4.84026	2.33169	2.72704	0.508811	0.1096	2.0073	2.2426	1791.19	1791.92	1792.77	0.0880054	1791.6	20.4669	0.00387327	0.950375	1791.6	20.4669	1.14238
UK034	UK034_90	269	1.777	0.3195	1.37715	1.70192	4.99557	3.70464	3.96539	0.371737	0.1134	3.43915	3.58159	1787.29	1818.57	1854.6	3.62963	1796.88	24.3396	3.30354	0.0691308	1796.88	24.3396	1.35455
UK034	UK034_39	622	7.04	0.3212	0.996264	1.41157	4.88486	2.14881	2.57243	0.463636	0.1103	1.9039	2.15054	1795.59	1799.65	1804.36	0.486035	1797.69	18.7476	0.128071	0.72044	1797.69	18.7476	1.04287
UK034	UK034_118	679	13.38	0.3232	1.08292	1.47401	4.83507	2.29871	2.6989	0.471099	0.1085	2.02765	2.26083	1805.34	1791.02	1774.38	-1.74456	1797.79	19.6269	1.47413	0.224695	1797.79	19.6269	1.09172
UK034	UK034_5	223.6	0.867	0.3221	1.6765	1.95209	4.95184	3.87878	4.12855	0.432223	0.1115	3.49776	3.6379	1799.98	1811.14	1824.01	1.31754	1804.24	27.5315	0.403006	0.525541	1804.24	27.5315	1.52593
UK034	UK034_34	173.2	2.178	0.3261	1.65593	1.93446	4.78852	4.45096	4.67023	0.37204	0.1065	4.13146	4.25076	1819.45	1782.89	1740.36	-4.54481	1807.5	27.8727	3.43034	0.0640088	1807.5	27.8727	1.54206
UK034	UK034_107	124.2	1.015	0.3227	1.48745	1.79235	5.06785	4.96886	5.1662	0.299354	0.1139	4.741	4.84532	1802.9	1830.74	1862.55	3.20248	1808.62	26.6201	1.54359	0.214085	1808.62	26.6201	1.47185
UK034	UK034_128	66	2.389	0.323	3.09598	3.25347	5.16609	9.07868	9.18817	0.341016	0.116	8.53448	8.59287	1804.36	1847.05	1895.47	4.80651	1812.6	48.846	1.18244	0.276859	1812.6	48.846	2.6948
UK034	UK034_71	70.4	1.102	0.3228	2.41636	2.61511	5.2074	6.69088	6.8387	0.361142	0.117	6.23932	6.31895	1803.39	1853.83	1910.89	5.62582	1814.75	38.8781	2.94789	0.0859899	1814.75	38.8781	2.14234
UK034	UK034_59	136.5	1.898	0.3227	1.98327	2.22111	5.19244	4.72125	4.92851	0.420072	0.1167	4.28449	4.39964	1802.9	1851.38	1906.28	5.42316	1818.5	32.0938	5.26412	0.0217694	1818.5	32.0938	1.76485
UK034	UK034_23	347	1.435	0.3255	1.2596	1.60829	5.08041	2.77575	3.11525	0.453788	0.1132	2.4735	2.66799	1816.53	1832.84	1851.41	1.88386	1824	22.1769	1.43908	0.230288	1824	22.1769	1.21584
UK034	UK034_85	106	0.5003	0.3263	2.05333	2.28389	5.0929	5.3562	5.53976	0.383355	0.1132	4.947	5.04706	1820.42	1834.92	1851.41	1.67377	1824.64	33.4911	0.376715	0.539367	1824.64	33.4911	1.83549
UK034	UK034_28	134.3	1.799	0.3284	1.64434	1.92454	4.98078	4.66317	4.8729	0.352622	0.11	4.36364	4.47675	1830.62	1816.06	1799.4	-1.73497	1826.41	28.2223	0.488635	0.484537	1826.41	28.2223	1.54524
UK034	UK034_9	78.6	1.408	0.3299	1.93998	2.18255	4.9353	6.03462	6.19811	0.321476	0.1085	5.71429	5.80113	1837.9	1808.31	1774.38	-3.5795	1830.86	32.6456	1.27969	0.257956	1830.86	32.6456	1.78308
UK034	UK034_127	114.9	1.052	0.3264	1.86887	2.1196	5.20247	4.4747	4.69286	0.417653	0.1156	4.06574	4.18692	1820.91	1853.02	1889.26	3.61762	1831.8	30.6615	2.53615	0.111266	1831.8	30.6615	1.67385
UK034	UK034_47	70.8	1.873	0.3289	2.28033	2.48996	5.16069	6.56022	6.71092	0.3476	0.1138	6.15114	6.2319	1833.05	1846.16	1860.96	1.50006	1836.15	37.3136	0.209332	0.647291	1836.15	37.3136	2.03216
UK034	UK034_108	200.5	2.203	0.3325	1.44361	1.75613	5.00628	3.76741	4.0241	0.383183	0.1092	3.47985	3.62069	1850.49	1820.39	1786.11	-3.60427	1839.5	25.2917	3.00419	0.0830493	1839.5	25.2917	1.37492
UK034	UK034_42	161.5	1.626	0.3354	1.63983	1.92069	4.99445	4.22049	4.45112	0.388541	0.108	3.88889	4.0154	1864.5	1818.38	1765.95	-5.58077	1847.55	27.853	5.87137	0.0153891	1847.55	27.853	1.50757
UK034	UK034_109	594	1.479	0.3324	1.59446	1.8821	5.22477	4.50232	4.7192	0.354143	0.114	4.21053	4.32765	1850	1856.66	1864.13	0.757987	1851.92	27.8782	0.105837	0.744935	1851.92	27.8782	1.50537
UK034	UK034_7	78.6	3.26	0.3364	1.69441	1.96749	5.20879	4.84721	5.0493	0.349565	0.1123	4.54141	4.6502	1869.33	1854.06	1836.97	-1.76162	1864.92	29.3689	0.492317	0.482896	1864.92	29.3689	1.57481
UK034	UK034_112	100.3	0.4669	0.3336	1.91847	2.16345	5.51041	5.20766	5.39627	0.368393	0.1198	4.8414	4.9436	1855.81	1902.22	1953.24	4.98823	1868.11	32.4989	3.86865	0.0491961	1868.11	32.4989	1.73967
UK034	UK034_119	175.8	1.091	0.3383	1.71445	1.98478	5.24754	4.18912	4.4214	0.409264	0.1125	3.82222	3.95087	1878.49	1860.37	1840.19	-2.08114	1871.59	28.925	0.898831	0.343095	1871.59	28.925	1.54547
UK034	UK034_31	202	1.258	0.3355	1.40089	1.72119	5.48629	3.19076	3.49012	0.439048	0.1186	2.86678	3.03619	1864.98	1898.45	1935.24	3.63025	1879.02	24.6307	4.71048	0.0299793	1879.02	24.6307	1.31083
UK034	UK034_124	296	0.829	0.3425	1.13869	1.51546	5.33158	3.46942	3.74658	0.328206	0.1129	3.27724	3.42641	1898.69	1873.94	1846.61	-2.81992	1890.53	22.4019	2.20404	0.13765	1890.53	22.4019	1.18496
UK034	UK034_88	216.6	1.485	0.3451	2.28919	2.49808	5.62424	5.18575	5.37513	0.441439	0.1182	4.65313	4.75937	1911.16	1919.82	1929.19	0.93468	1914.57	36.9927	0.138313	0.709964	1914.57	36.9927	1.93217
UK034	UK034_77	63.8	1.775	0.3564	2.16049	2.3807	6.25558	7.09275	7.23237	0.304606	0.1273	6.7557	6.82931	1965.09	2012.26	2061.02	4.65455	1974.11	38.3157	2.1183	0.145548	1974.11	38.3157	1.94091
UK034	UK034_60	226	5.1	0.3642	1.56507	1.85727	6.44772	3.62617	3.89218	0.431606	0.1284	3.27103	3.42047	2002.05	2038.8	2076.18	3.57055	2017.59	28.1352	4.28079	0.0385454	2017.59	28.1352	1.39449
UK034	UK034_1	102.4	2.28	0.3701	1.97244	2.21145	6.37867	4.74899	4.95509	0.415339	0.125	4.32	4.43423	2029.87	2029.34	2028.8	-0.0529441	2029.66	34.2081	0.00057215	0.980917	2029.66	34.2081	1.68541
UK034	UK034_29	71.9	1.321	0.3694	1.81375	2.07116	6.5245	4.4461	4.6656	0.407942	0.1281	4.05933	4.18069	2026.58	2049.21	2072.06	2.19518	2035.17	32.183	1.14372	0.284868	2035.17	32.183	1.58134
UK034	UK034_73	47.5	1.937	0.3717	2.52892	2.71946	6.6625	7.01049	7.15171	0.360734	0.13	6.53846	6.61449	2037.39	2067.66	2097.96	2.887	2045.72	44.025	0.884979	0.346842	2045.72	44.025	2.15205
UK034	UK034_94	62.2	0.866	0.3747	2.05498	2.28537	6.68011	5.86303	6.03118	0.350497	0.1293	5.49111	5.58142	2051.48	2069.99	2088.47	1.77141	2056.75	36.9979	0.460654	0.497318	2056.75	36.9979	1.79885
UK034	UK034_18	153	1.361	0.4214	1.66113	1.9389	8.33773	4.17724	4.41014	0.397662	0.1435	3.83275	3.96106	2266.83	2268.43	2269.87	0.133862	2267.53	32.1113	0.0056908	0.939867	2267.53	32.1113	1.41614
UK034	UK034_79	143.5	1.369	0.4195	1.97855	2.2169	8.41582	3.96531	4.20995	0.498964	0.1455	3.43643	3.57897	2258.21	2276.89	2293.7	1.54727	2269.25	34.7342	0.852605	0.355816	2269.25	34.7342	1.53064
UK034	UK034_97	180.4	1.644	0.4208	1.3308	1.66464	8.52312	3.27757	3.56966	0.406032	0.1469	2.99523	3.15776	2264.11	2288.39	2310.15	1.99291	2275.58	27.0546	1.91407	0.166512	2275.58	27.0546	1.18891
UK034	UK034_116	120.5	1.08	0.4835	1.67528	1.95105	11.0664	3.87485	4.12486	0.432348	0.166	3.49398	3.63426	2542.49	2528.73	2517.71	-0.984259	2534.75	33.4249	0.422836	0.515525	2534.75	33.4249	1.31866
UK034	UK034_66	192.3	1.668	0.5063	1.28382	1.62733	12.6005	2.75508	3.09685	0.465985	0.1805	2.43767	2.63482	2640.81	2650.25	2657.47	0.626744	2647.15	27.0291	0.314089	0.575182	2647.15	27.0291	1.02107
UK034	UK034_86	234	1.291	0.5127	1.54086	1.83691	12.8092	3.20875	3.50657	0.480207	0.1812	2.81457	2.98694	2668.15	2665.72	2663.88	-0.15998	2666.49	30.749	0.0164474	0.897953	2666.49	30.749	1.15316
UK034	UK034_41	332	1.385	0.5141	1.69228	1.96566	12.8442	2.48607	2.86017	0.680704	0.1812	1.82119	2.07768	2674.11	2668.29	2663.88	-0.38384	2667.92	26.8785	0.135425	0.712872	2667.92	26.8785	1.00747
UK034	UK034_45	73.4	0.657	0.53	2.64151	2.82446	13.4314	4.50173	4.71864	0.586777	0.1838	3.64527	3.77994	2741.45	2710.47	2687.46	-2.009	2714.21	43.9896	1.43532	0.230899	2714.21	43.9896	1.62071
UK034	UK034_96	53.3	0.1432	0.53	2.26415	2.47515	13.5995	5.04974	5.24403	0.44837	0.1861	4.5137	4.62315	2741.45	2722.23	2708	-1.23537	2729.83	44.1546	0.484422	0.486426	2729.83	44.1546	1.61748
UK034	UK034_99	231.7	2.187	0.5515	1.37806	1.70266	15.8773	2.59857	2.95847	0.530316	0.2088	2.20307	2.4194	2831.41	2869.44	2896.25	2.23895	2862.04	27.6858	5.03823	0.0247939	2862.04	27.6858	0.967346
UK034	UK034_2	169	1.648	0.3073	1.85486	2.10726	5.33869	4.45239	4.67159	0.4166	0.126	4.04762	4.16932	1727.41	1875.08	2042.89	15.4431	1762.92	30.2043	52.1655	5.10159e-13
UK034	UK034_3	219	2.159	0.4536	1.3448	1.67585	10.2007	2.69012	3.0392	0.499903	0.1631	2.32986	2.5354	2411.24	2453.14	2488.05	3.08739	2438.98	26.4323	7.16109	0.00745018
UK034	UK034_15	401	0.785	0.2561	1.24951	1.6004	3.66176	3.24002	3.53522	0.385649	0.1037	2.98939	3.15222	1469.86	1563.07	1691.37	13.0968	1491.45	19.8904	42.3744	7.53699e-11
UK034	UK034_19	202	4.05	0.4613	1.64752	1.92726	11.3915	3.14596	3.44921	0.523693	0.1791	2.68007	2.86055	2445.3	2555.73	2644.55	7.53468	2518.05	31.0591	38.8288	4.6265e-10
UK034	UK034_22	178	1.033	0.4622	1.31977	1.65584	10.7318	2.82173	3.15629	0.467719	0.1684	2.49406	2.68707	2449.26	2500.18	2541.8	3.64067	2480.37	26.9706	9.62795	0.00191638
UK034	UK034_26	742	4.83	0.3383	1.06414	1.46027	5.14959	2.42039	2.80327	0.439658	0.1104	2.17391	2.39288	1878.49	1844.33	1806	-4.01338	1860.96	20.0655	7.39358	0.00654571
UK034	UK034_30	156.1	1.735	0.4755	1.36698	1.69371	11.6831	2.97069	3.29013	0.460157	0.1782	2.63749	2.8207	2507.64	2579.35	2636.19	4.87651	2550.31	28.2992	17.193	3.3768e-05
UK034	UK034_33	203	3.001	0.3233	1.51562	1.81579	5.21992	3.81524	4.06892	0.397254	0.1171	3.50128	3.64129	1805.83	1855.87	1912.43	5.5741	1821.87	26.1673	7.96121	0.00477903
UK034	UK034_35	107.8	1.512	0.3275	1.9542	2.1952	5.52254	5.3569	5.54043	0.3648	0.1223	4.98774	5.08699	1826.25	1904.11	1990.05	8.23074	1844.59	32.8736	10.2224	0.00138742
UK034	UK034_37	98.4	1.544	0.4787	2.02632	2.25964	10.1315	4.28755	4.51476	0.472606	0.1535	3.7785	3.90859	2521.6	2446.85	2385.29	-5.71481	2473.65	37.2732	10.6785	0.00108386
UK034	UK034_38	693	3.919	0.3036	1.15283	1.52611	4.55859	2.09119	2.52449	0.551281	0.1089	1.74472	2.01098	1709.14	1741.73	1781.1	4.04023	1728.02	19.3786	9.71577	0.00182694
UK034	UK034_40	289	2.45	0.1035	2.1256	2.34908	1.06173	7.9507	8.07549	0.267348	0.0744	7.66129	7.72628	634.888	734.676	1052.34	39.6688	636.189	14.1893	21.7907	3.04074e-06
UK034	UK034_43	190	2.667	0.01429	5.03849	5.13677	0.161565	23.7122	23.7544	0.212485	0.082	23.1707	23.1923	91.4673	152.072	1245.52	92.6563	90.7733	4.64962	12.7933	0.00034787
UK034	UK034_46	416	1.871	0.3485	1.37733	1.70207	6.26107	2.81573	3.15093	0.489156	0.1303	2.45587	2.65166	1927.43	2013.02	2102.01	8.30534	1968.88	24.5795	36.0111	1.96197e-09
UK034	UK034_61	562	3.58	0.3104	1.25644	1.60582	5.42678	2.47239	2.84829	0.508189	0.1268	2.12934	2.35246	1742.67	1889.09	2054.07	15.16	1804.4	21.9611	140.334	2.24959e-32
UK034	UK034_62	283	3.421	0.2245	1.55902	1.85217	2.80134	4.2725	4.50047	0.364897	0.0905	3.9779	4.10167	1305.61	1355.9	1436.1	9.08666	1314.43	21.0651	9.10593	0.00254782
UK034	UK034_63	458	6	0.3056	1.27618	1.62131	4.74874	2.63646	2.99181	0.48405	0.1127	2.30701	2.51442	1719.02	1775.89	1843.4	6.74762	1744.38	21.596	20.1145	7.29406e-06
UK034	UK034_67	335	2.223	0.3346	0.986252	1.40453	5.51309	3.16988	3.47105	0.311132	0.1195	3.01255	3.17419	1860.64	1902.64	1948.76	4.52187	1872.95	20.6711	7.03232	0.00800514
UK034	UK034_68	272	0.973	0.1051	2.18839	2.40605	1.01583	6.6473	6.79607	0.329215	0.0701	6.27675	6.35591	644.228	711.816	931.284	30.8237	646.343	14.7077	15.7804	7.11338e-05
UK034	UK034_69	172.1	1.672	0.383	3.65535	3.78967	9.8223	6.23716	6.39548	0.586061	0.186	5.05376	5.15175	2090.28	2418.24	2707.11	22.7855	2237.71	60.6184	121.755	2.61142e-28
UK034	UK034_70	373.8	2.365	0.4004	1.42358	1.7397	8.73929	3.17923	3.47959	0.447773	0.1583	2.8427	3.01346	2170.88	2311.18	2437.58	10.9413	2233.01	27.9846	67.8459	1.76783e-16
UK034	UK034_75	58.7	2.872	0.504	2.18254	2.40072	13.2868	4.58059	4.79393	0.476476	0.1912	4.0272	4.1495	2630.96	2700.24	2752.51	4.41588	2672.59	41.8576	7.62763	0.00574807
UK034	UK034_80	155.6	3.67	0.1908	1.62474	1.90782	2.50711	6.90938	7.05263	0.23515	0.0953	6.71563	6.78968	1125.71	1274.09	1534.01	26.6167	1131.22	19.5877	30.4815	3.37071e-08
UK034	UK034_95	815	3.41	0.2847	2.00211	2.23795	4.22378	4.14074	4.37558	0.483515	0.1076	3.62454	3.75995	1614.99	1678.65	1759.17	8.19576	1637.44	29.3688	13.1741	0.00028385
UK034	UK034_101	229	2.16	0.4532	1.69903	1.97147	10.3666	2.70879	3.05574	0.627228	0.1659	2.1097	2.33471	2409.46	2468.07	2516.7	4.26097	2461.41	28.2645	14.3372	0.000152812
UK034	UK034_104	308	2.128	0.3203	1.34249	1.674	5.1229	3.22386	3.5204	0.416424	0.116	2.93103	3.09693	1791.19	1839.91	1895.47	5.5013	1808.92	23.5981	10.0539	0.00152029
UK034	UK034_110	40.4	1.152	0.312	3.20513	3.35751	5.45045	7.57781	7.70865	0.422962	0.1267	6.86661	6.93905	1750.54	1892.83	2052.68	14.7193	1781.88	49.0681	18.1135	2.08118e-05
UK034	UK034_111	179	1.876	0.4605	1.5418	1.8377	10.6416	2.89163	3.21893	0.533194	0.1676	2.4463	2.6428	2441.77	2492.34	2533.82	3.63294	2477.78	28.7453	9.32134	0.002265
UK034	UK034_114	208.4	2.807	0.4391	1.59417	1.88185	10.5587	3.18064	3.48088	0.50121	0.1744	2.75229	2.92833	2346.61	2485.09	2600.32	9.75697	2426.22	30.5742	62.3105	2.93361e-15
UK034	UK034_120	156.3	1.607	0.2981	1.9792	2.21748	4.58288	5.23186	5.41963	0.378298	0.1115	4.84305	4.94521	1681.88	1746.16	1824.01	7.7921	1696.69	31.0337	7.99014	0.00470328
UK034	UK034_122	202.5	2.356	0.528	1.38258	1.70632	12.9949	3.02368	3.33806	0.457249	0.1785	2.68908	2.86899	2733.02	2679.29	2638.98	-3.56337	2696.17	28.7756	8.62539	0.00331509
UK034	UK034_125	361	1.8	0.3245	1.51002	1.81112	4.71581	2.9736	3.29276	0.507807	0.1054	2.56167	2.74994	1811.67	1770.05	1721.3	-5.24979	1788.52	24.1709	8.96477	0.00275235
UK034	UK034_126	389.1	2.41	0.4232	2.33932	2.54409	10.2347	4.28642	4.51369	0.545752	0.1754	3.59179	3.7284	2274.99	2456.22	2609.85	12.8306	2380.41	40.7506	68.2098	1.46997e-16
Sample: Falher D Member		Lat 54.034323		Long -119.049094		Datum NAD83		Beam Diameter: 22 µm
Sample Details		U (ppm)1	U/Th	Final 206Pb/238U (2σ)			Final 207Pb/235U (2σ)			Error Correlation	Final 207Pb/206Pb (2σ)			Apparent Age (Ma)				Concordia Age (Internal + External Errors)				Accepted Ages2
Sample	Spot			206/238	Int. (%)3	I+E (%)4	207/235	Int. (%)3	I+E (%)4		207/206	Int. (%)3	I+E (%)4	206Pb/ 238U	207Pb/ 235U	207Pb/ 206Pb	Disc (%)5	Age (Ma)	± Ma	MSWD	Prob. Fit	Age (Ma)	2σ (Ma)	2σ (%)
UK036	UK036_23	737	2.89	0.0169	11.8343	11.8765	0.181753	34.1663	34.1956	0.346374	0.078	32.0513	32.0669	108.034	169.568	1146.87	90.5801	106.087	12.6205	5.58704	0.0180939	106.087	12.6205	11.8963
UK036	UK036_33	199.2	3.8	0.01697	4.89098	4.99217	0.13571	28.0164	28.0521	0.174576	0.058	27.5862	27.6043	108.478	129.215	529.762	79.5233	108.411	5.36903	1.50006	0.220663	108.411	5.36903	4.95248
UK036	UK036_1	1170	2.019	0.01707	3.10486	3.26193	0.121446	11.6612	11.7467	0.266255	0.0516	11.2403	11.2847	109.112	116.382	267.725	59.2448	109.122	3.52914	1.35436	0.244517	109.122	3.52914	3.23411
UK036	UK036_22	631	1.502	0.01773	2.76368	2.93903	0.118075	14.1443	14.2148	0.195392	0.0483	13.8716	13.9076	113.294	113.325	113.989	0.610393	113.294	3.29988	1.78839e-05	0.996626	113.294	3.29988	2.91268
UK036	UK036_30	1245	1.489	0.01868	1.7666	2.02999	0.118735	8.00644	8.13038	0.220647	0.0461	7.80911	7.87288	119.308	113.925	2.85152	-4084.01	119.223	2.39594	1.59082	0.207209	119.223	2.39594	2.00962
UK036	UK036_73	1310	2.368	0.02643	2.34582	2.55007	0.183302	10.2134	10.3108	0.22968	0.0503	9.94036	9.99053	168.166	170.898	208.88	19.4916	168.189	4.2308	0.119354	0.729736	168.189	4.2308	2.5155
UK036	UK036_70	294	1.806	0.03475	2.73381	2.91097	0.247712	15.3327	15.3978	0.178299	0.0517	15.087	15.1201	220.209	224.716	272.164	19.0897	220.231	6.30008	0.0866713	0.768452	220.231	6.30008	2.86067
UK036	UK036_75	711	1.84	0.03768	1.85775	2.10979	0.271196	9.38119	9.48718	0.198029	0.0522	9.1954	9.24962	238.436	243.649	294.181	18.949	238.49	4.93425	0.266012	0.606019	238.49	4.93425	2.06896
UK036	UK036_15	368	1.664	0.067	1.9403	2.18283	0.520097	7.70824	7.83689	0.251718	0.0563	7.46004	7.52676	418.056	425.216	464.219	9.94413	418.23	8.81222	0.291731	0.589113	418.23	8.81222	2.10703
UK036	UK036_54	849	56.6	0.0684	1.60819	1.89374	0.546998	5.58153	5.7579	0.288127	0.058	5.34483	5.43757	426.509	443.028	529.762	19.4904	427.072	7.785	2.71958	0.0991243	427.072	7.785	1.82288
UK036	UK036_59	227	2.74	0.0698	2.5788	2.7659	0.537983	10.5178	10.6125	0.245184	0.0559	10.1968	10.2457	434.951	437.094	448.399	2.99916	434.995	11.609	0.0136716	0.906919	434.995	11.609	2.66877
UK036	UK036_46	335	1.216	0.0713	1.82328	2.07951	0.597715	7.46299	7.5958	0.24431	0.0608	7.23684	7.30561	443.983	475.783	632.166	29.768	444.553	8.90653	4.99178	0.025468	444.553	8.90653	2.00348
UK036	UK036_13	441	1.506	0.0926	2.59179	2.77802	0.758401	7.68904	7.81801	0.337076	0.0594	7.23906	7.3078	570.896	573.087	581.788	1.87224	571.009	15.0833	0.0182189	0.89263	571.009	15.0833	2.64151
UK036	UK036_39	206.6	1.063	0.0995	3.21608	3.36796	0.880764	7.42994	7.56333	0.432854	0.0642	6.69782	6.77206	611.478	641.395	748.226	18.2763	613.406	19.5258	3.26884	0.0706077	613.406	19.5258	3.18318
UK036	UK036_35	1059	2.158	0.1006	1.98807	2.22541	0.864146	4.91446	5.11389	0.404535	0.0623	4.49438	4.60429	617.924	632.384	684.423	9.71603	619.143	12.9737	1.66637	0.196745	619.143	12.9737	2.09543
UK036	UK036_18	423	3.58	0.1047	2.38777	2.58872	0.869049	10.4104	10.506	0.229364	0.0602	10.1329	10.1821	641.894	635.051	610.771	-5.09571	641.684	15.7472	0.0801931	0.777036	641.684	15.7472	2.45405
UK036	UK036_66	33.8	1.629	0.1258	4.61049	4.71769	1.07541	19.8964	19.9466	0.231725	0.062	19.3548	19.3807	763.861	741.39	674.109	-13.3142	763.098	33.8124	0.196088	0.657897	763.098	33.8124	4.43093
UK036	UK036_12	196.3	1.924	0.1551	1.54739	1.84239	1.38362	6.67338	6.82158	0.231875	0.0647	6.4915	6.56807	929.489	881.983	764.596	-21.566	925.894	15.6827	5.97351	0.0145224	925.894	15.6827	1.69379
UK036	UK036_7	111.6	1.427	0.1602	2.5593	2.74773	1.70743	9.53489	9.6392	0.268414	0.0773	9.18499	9.23927	957.888	1011.32	1128.94	15.1515	960.264	24.2961	3.0275	0.0818643	960.264	24.2961	2.53015
UK036	UK036_43	20.4	1.204	0.1627	5.59312	5.68181	1.77221	21.0113	21.0588	0.266196	0.079	20.2532	20.2778	971.764	1035.33	1172.13	17.0945	973.9	51.031	0.867809	0.351563	973.9	51.031	5.23986
UK036	UK036_63	426	1.72	0.165	1.57576	1.86628	1.70626	5.30605	5.49128	0.296974	0.075	5.06667	5.16441	984.503	1010.88	1068.5	7.8613	986.862	16.7503	2.32837	0.127035	986.862	16.7503	1.69733
UK036	UK036_56	449	2.668	0.1694	1.53483	1.83186	1.73542	5.98741	6.15216	0.256343	0.0743	5.78735	5.87311	1008.8	1021.76	1049.63	3.88928	1009.79	16.8448	0.438382	0.507905	1009.79	16.8448	1.66815
UK036	UK036_68	447.7	0.3035	0.1703	1.1744	1.54247	1.81977	4.41705	4.63792	0.265878	0.0775	4.25806	4.37391	1013.76	1052.6	1134.09	10.6095	1017.4	14.1778	6.50596	0.0107513	1017.4	14.1778	1.39354
UK036	UK036_60	169.8	2.696	0.1729	1.73511	2.00265	1.77366	6.68086	6.8289	0.259713	0.0744	6.45161	6.52865	1028.07	1035.86	1052.34	2.30612	1028.65	18.7527	0.127585	0.72095	1028.65	18.7527	1.82304
UK036	UK036_20	541	2.439	0.1752	2.05479	2.28521	1.85523	5.84204	6.01077	0.351726	0.0768	5.46875	5.55943	1040.7	1065.29	1116	6.74755	1043.5	21.5132	1.64594	0.199512	1043.5	21.5132	2.06163
UK036	UK036_5	393	3.32	0.1799	1.38966	1.71206	1.87027	4.33991	4.56452	0.320205	0.0754	4.11141	4.23127	1066.43	1070.63	1079.18	1.18198	1067	16.3313	0.0807629	0.776266	1067	16.3313	1.53058
UK036	UK036_79	413	3.826	0.1805	1.16343	1.53414	1.82922	4.37521	4.59809	0.265915	0.0735	4.21769	4.33461	1069.71	1056	1027.77	-4.08012	1068.02	14.6734	0.846399	0.357573	1068.02	14.6734	1.37389
UK036	UK036_77	662	2.254	0.1861	1.28963	1.63191	2.04249	3.5117	3.78577	0.367237	0.0796	3.26633	3.41598	1100.21	1129.79	1187.09	7.31883	1105.35	15.8985	5.4875	0.0191529	1105.35	15.8985	1.43832
UK036	UK036_38	125	1.927	0.194	2.93814	3.10366	2.0864	7.75743	7.88529	0.378752	0.078	7.17949	7.2488	1143.01	1144.34	1146.87	0.33708	1143.2	31.6167	0.00268354	0.958686	1143.2	31.6167	2.76562
UK036	UK036_62	250	2.647	0.2105	1.47268	1.78011	2.36834	4.65107	4.86132	0.316633	0.0816	4.41176	4.52368	1231.48	1233.1	1235.93	0.360217	1231.73	19.2571	0.00900291	0.924407	1231.73	19.2571	1.56342
UK036	UK036_27	121.8	0.811	0.2115	2.12766	2.35094	2.43208	6.58804	6.73812	0.322958	0.0834	6.23501	6.3147	1236.8	1252.14	1278.59	3.26838	1238.7	25.79	0.418317	0.517778	1238.7	25.79	2.08202
UK036	UK036_31	83.4	2.86	0.2267	2.11734	2.3416	2.81942	8.1512	8.27297	0.259758	0.0902	7.8714	7.93466	1317.18	1360.71	1429.77	7.87451	1320.62	27.447	1.96344	0.161146	1320.62	27.447	2.07835
UK036	UK036_81	420	4.19	0.2325	1.46237	1.77158	2.80179	3.83655	4.0889	0.381167	0.0874	3.54691	3.68518	1347.59	1356.02	1369.33	1.58768	1349.56	20.3641	0.314921	0.574676	1349.56	20.3641	1.50895
UK036	UK036_26	416	1.608	0.2364	1.14213	1.51805	2.9042	3.23839	3.53372	0.352685	0.0891	3.0303	3.19104	1367.95	1383.01	1406.31	2.72741	1371.55	17.5755	1.26518	0.260672	1371.55	17.5755	1.28144
UK036	UK036_29	884	4.159	0.2491	1.04376	1.44549	3.09113	2.86366	3.19383	0.364484	0.09	2.66667	2.848	1433.83	1430.49	1425.53	-0.582447	1432.85	17.1047	0.0727755	0.787338	1432.85	17.1047	1.19375
UK036	UK036_80	216	1.879	0.2536	1.45899	1.7688	3.30782	4.37318	4.59616	0.333623	0.0946	4.12262	4.24217	1457.01	1482.9	1520.12	4.15144	1462.01	21.9872	2.08471	0.14878	1462.01	21.9872	1.50391
UK036	UK036_42	51.8	3.53	0.2538	3.15209	3.30691	3.36292	8.6102	8.72557	0.366088	0.0961	8.01249	8.07465	1458.04	1495.8	1549.73	5.91619	1464.26	41.6803	1.27301	0.259204	1464.26	41.6803	2.84651
UK036	UK036_53	215.7	2.68	0.2535	2.28797	2.49696	3.36593	5.86452	6.03262	0.390138	0.0963	5.39979	5.49161	1456.5	1496.5	1553.63	6.25189	1464.6	31.133	2.98906	0.0838289	1464.6	31.133	2.1257
UK036	UK036_74	376	1.479	0.2837	1.12795	1.50741	3.79039	3.10192	3.4091	0.36363	0.0969	2.88958	3.05772	1609.97	1590.71	1565.28	-2.85485	1603.73	19.5067	1.90918	0.167055	1603.73	19.5067	1.21633
UK036	UK036_8	265	1.388	0.2867	1.43007	1.74502	4.0558	4.79893	5.00297	0.297997	0.1026	4.5809	4.68878	1625.02	1645.46	1671.68	2.79148	1628.82	23.8494	0.982381	0.321612	1628.82	23.8494	1.46422
UK036	UK036_78	138.2	0.525	0.2868	1.42957	1.74461	4.06908	4.32474	4.5501	0.330556	0.1029	4.08163	4.20235	1625.52	1648.13	1677.08	3.07438	1630.55	23.6178	1.45275	0.228088	1630.55	23.6178	1.44846
UK036	UK036_52	185.3	1.788	0.29	2.37931	2.58091	3.91855	5.90841	6.07531	0.402699	0.098	5.40816	5.49984	1641.53	1617.52	1586.41	-3.47433	1634.49	34.6878	0.999679	0.317388	1634.49	34.6878	2.12225
UK036	UK036_9	138.5	3.395	0.2904	1.72176	1.9911	4.24828	4.6649	4.87456	0.369089	0.1061	4.33553	4.44936	1643.53	1683.4	1733.46	5.18776	1653.09	27.1837	3.92575	0.047552	1653.09	27.1837	1.64442
UK036	UK036_41	463	1.862	0.2965	1.21417	1.57296	4.30073	2.58435	2.94599	0.469815	0.1052	2.28137	2.49091	1673.93	1693.5	1717.81	2.55461	1682.68	20.4002	2.54897	0.110366	1682.68	20.4002	1.21236
UK036	UK036_49	119.4	1.373	0.3199	1.87559	2.12552	4.53869	5.11796	5.30976	0.366471	0.1029	4.7619	4.86577	1789.24	1738.09	1677.08	-6.68799	1773.52	30.4177	5.41686	0.0199432	1773.52	30.4177	1.7151
UK036	UK036_28	361	2.27	0.3165	2.74882	2.92506	4.85702	6.86377	7.00795	0.400482	0.1113	6.28931	6.36831	1772.61	1794.83	1820.75	2.64384	1778.82	42.2299	0.575463	0.448096	1778.82	42.2299	2.37404
UK036	UK036_6	186.8	2.778	0.3178	1.41598	1.7335	4.85506	3.29781	3.58825	0.429372	0.1108	2.97834	3.14174	1778.98	1794.49	1812.58	1.85374	1785.08	24.0599	1.01951	0.312636	1785.08	24.0599	1.34783
UK036	UK036_55	260.3	1.403	0.3215	2.05288	2.28349	4.86726	5.32929	5.51374	0.385206	0.1098	4.91803	5.01867	1797.05	1796.61	1796.09	-0.0534199	1796.92	33.0374	0.000365552	0.984746	1796.92	33.0374	1.83856
UK036	UK036_84	104.5	4.48	0.3296	2.03277	2.26542	4.93081	4.78504	4.98965	0.424817	0.1085	4.3318	4.44572	1836.44	1807.55	1774.38	-3.49754	1825.34	32.4544	1.88638	0.169611	1825.34	32.4544	1.77799
UK036	UK036_34	217	2.189	0.3286	1.30858	1.64693	5.00646	3.5109	3.78503	0.37272	0.1105	3.25792	3.40794	1831.59	1820.42	1807.65	-1.32449	1827.68	23.6074	0.46105	0.497134	1827.68	23.6074	1.29166
UK036	UK036_16	369	1.747	0.3292	1.54921	1.84392	5.07007	4.39993	4.62162	0.352099	0.1117	4.11817	4.23785	1834.5	1831.11	1827.26	-0.396436	1833.52	27.0659	0.0289634	0.864864	1833.52	27.0659	1.47618
UK036	UK036_58	184	1.909	0.3306	1.54265	1.83841	5.04605	4.26357	4.492	0.361821	0.1107	3.97471	4.09857	1841.29	1827.09	1810.94	-1.67608	1836.85	26.8683	0.539632	0.462585	1836.85	26.8683	1.46274
UK036	UK036_17	216	2.16	0.3328	1.5625	1.8551	4.97868	3.83504	4.08749	0.407427	0.1085	3.5023	3.64227	1851.94	1815.71	1774.38	-4.37087	1837.63	26.5223	4.26998	0.0387914	1837.63	26.5223	1.44329
UK036	UK036_11	338	1.699	0.3326	0.992183	1.4087	5.12244	2.53031	2.8987	0.39212	0.1117	2.32766	2.53338	1850.97	1839.83	1827.26	-1.2977	1846.11	19.6104	0.729407	0.393076	1846.11	19.6104	1.06226
UK036	UK036_3	182.4	1.899	0.3328	1.59255	1.88048	5.21729	3.23376	3.52947	0.492476	0.1137	2.81442	2.9868	1851.94	1855.44	1859.38	0.399964	1853.71	26.082	0.0531582	0.817656	1853.71	26.082	1.40702
UK036	UK036_10	83	0.971	0.3312	2.14372	2.36549	5.35204	5.47156	5.65137	0.391793	0.1172	5.03413	5.13249	1844.2	1877.22	1913.96	3.64492	1853.86	35.0948	1.83551	0.175478	1853.86	35.0948	1.89306
UK036	UK036_21	76	0.793	0.3327	2.37451	2.57649	5.33958	6.30606	6.46269	0.376544	0.1164	5.84192	5.92689	1851.46	1875.22	1901.66	2.63995	1857.88	38.6065	0.732422	0.392099	1857.88	38.6065	2.07798
UK036	UK036_14	598	1.313	0.3339	1.43756	1.75116	5.27597	4.67669	4.88584	0.307388	0.1146	4.45026	4.56123	1857.26	1864.98	1873.6	0.872502	1859.09	26.3661	0.131089	0.717305	1859.09	26.3661	1.41822
UK036	UK036_32	43.8	0.698	0.3385	2.48154	2.67545	5.08729	9.15026	9.2589	0.271198	0.109	8.80734	8.86393	1879.45	1833.99	1782.77	-5.42301	1871.71	41.6212	1.37193	0.24148	1871.71	41.6212	2.2237
UK036	UK036_47	193	1.516	0.3501	1.57098	1.86225	5.55126	3.65878	3.92259	0.429372	0.115	3.30435	3.45235	1935.08	1908.57	1879.88	-2.9359	1923.37	27.1785	2.34775	0.125464	1923.37	27.1785	1.41307
UK036	UK036_64	446	2.357	0.3465	1.09668	1.48415	5.7235	2.88749	3.21521	0.379805	0.1198	2.67112	2.85217	1917.86	1934.92	1953.24	1.8111	1924.62	21.6731	1.34776	0.245669	1924.62	21.6731	1.1261
UK036	UK036_24	458.9	2.285	0.3513	2.13493	2.35752	5.92387	4.0437	4.28386	0.527964	0.1223	3.43418	3.57681	1940.8	1964.74	1990.05	2.47459	1954	33.6196	1.63933	0.200418	1954	33.6196	1.72055
UK036	UK036_76	171.4	2.645	0.3518	1.59181	1.87986	5.98566	3.83097	4.08367	0.415512	0.1234	3.4846	3.62525	1943.19	1973.76	2005.96	3.12919	1954.95	28.1632	2.79116	0.0947855	1954.95	28.1632	1.44061
UK036	UK036_2	163.5	0.762	0.38	2.89474	3.0626	6.49691	6.63276	6.78185	0.436431	0.124	5.96774	6.05095	2076.28	2045.48	2014.56	-3.06366	2062.97	47.7906	1.03951	0.307936	2062.97	47.7906	2.31659
UK036	UK036_45	235.2	1.936	0.442	2.94118	3.10653	9.68993	5.347	5.53086	0.550061	0.159	4.46541	4.57601	2359.59	2405.75	2445.05	3.49548	2391.15	48.6871	2.91481	0.0877697	2391.15	48.6871	2.03613
UK036	UK036_61	116.5	1.484	0.5066	1.87525	2.12522	13.0899	3.7566	4.01398	0.499188	0.1874	3.25507	3.40521	2642.1	2686.15	2719.48	2.84536	2671.82	35.7732	4.2735	0.0387112	2671.82	35.7732	1.33891
UK036	UK036_51	86.8	2.256	0.5498	1.65515	1.93378	15.8814	3.39083	3.67392	0.488125	0.2095	2.95943	3.12381	2824.34	2869.69	2901.68	2.66536	2856.2	33.3898	4.91837	0.0265726	2856.2	33.3898	1.16903
UK036	UK036_4	463	1.906	0.2687	1.6003	1.88705	3.77523	4.23909	4.46876	0.37751	0.1019	3.92542	4.05079	1534.2	1587.49	1659.01	7.52345	1546.35	24.3782	8.80105	0.00301058
UK036	UK036_19	194.7	5.13	0.3531	1.81252	2.07008	5.40895	3.87091	4.12116	0.46824	0.1111	3.42034	3.56353	1949.38	1886.27	1817.49	-7.25714	1916.85	29.6669	12.3377	0.000443896
UK036	UK036_25	949	2.483	0.06247	1.42468	1.74061	0.549533	4.31709	4.54283	0.33001	0.0638	4.07524	4.19613	390.629	444.69	735.007	46.8536	391.883	6.58586	46.3492	9.89481e-12
UK036	UK036_36	162	2.594	0.2249	2.40107	2.60099	2.83734	5.18022	5.3698	0.463506	0.0915	4.59016	4.69783	1307.71	1365.47	1457.03	10.2479	1321.04	29.4255	9.08565	0.00257623
UK036	UK036_37	811	7.15	0.02392	2.7592	2.93482	0.193268	9.61924	9.72264	0.286842	0.0586	9.21502	9.26912	152.383	179.414	552.267	72.4078	152.241	4.41906	12.126	0.000497239
UK036	UK036_40	231	1.052	0.3125	1.216	1.57437	4.83873	3.09812	3.40564	0.392496	0.1123	2.84951	3.01989	1753	1791.66	1836.97	4.57111	1766.32	21.8612	6.83396	0.00894407
UK036	UK036_44	103.4	1.155	0.283	2.19081	2.40825	4.21026	5.54818	5.72558	0.394871	0.1079	5.09731	5.19448	1606.45	1676.02	1764.26	8.94442	1621.97	32.5298	8.82735	0.0029675
UK036	UK036_48	66.8	1.545	0.3369	2.1965	2.41342	6.10376	5.34299	5.52699	0.411099	0.1314	4.87062	4.97222	1871.74	1990.79	2116.76	11.5753	1903.96	36.6604	23.2304	1.43706e-06
UK036	UK036_50	744	2.83	0.3275	1.58779	1.87645	5.5406	2.64786	3.00186	0.599648	0.1227	2.11899	2.3431	1826.25	1906.92	1995.85	8.49767	1877.67	24.9042	40.9474	1.56384e-10
UK036	UK036_57	904	1.0669	0.4525	1.03867	1.44182	10.6002	1.56989	2.11295	0.661622	0.1699	1.17716	1.54458	2406.36	2488.72	2556.66	5.87878	2486.17	19.643	58.2437	2.31576e-14
UK036	UK036_65	561	0.69	0.0976	2.35656	2.55995	0.928539	8.45115	8.56866	0.278845	0.069	8.11594	8.17732	600.329	666.866	898.74	33.2033	601.538	14.652	10.225	0.00138553
UK036	UK036_67	580	5.79	0.4321	1.85142	2.10423	9.45502	3.65432	3.91842	0.50664	0.1587	3.1506	3.30549	2315.18	2383.19	2441.86	5.18784	2356	33.4943	12.4468	0.000418716
UK036	UK036_69	626	1.87	0.187	1.28342	1.62701	2.0962	3.21895	3.51591	0.398708	0.0813	2.95203	3.11681	1105.1	1147.56	1228.71	10.0596	1113.27	15.8704	13.0372	0.000305371
UK036	UK036_72	704	2.25	0.0157	3.05732	3.21671	0.133563	12.6914	12.77	0.240897	0.0617	12.3177	12.3582	100.422	127.294	663.727	84.8699	100.206	3.2031	12.7765	0.000350999
UK036	UK036_82	304	1.509	0.2716	2.46686	2.66184	4.2279	5.53971	5.71738	0.445305	0.1129	4.96014	5.05994	1548.92	1679.45	1846.61	16.1211	1577.29	35.0679	31.5226	1.97136e-08
UK036	UK036_83	86.6	0.947	0.2528	2.76899	2.94403	4.09559	6.49243	6.64467	0.426495	0.1175	5.87234	5.95688	1452.9	1653.42	1918.54	24.2707	1478.01	37.5253	53.4003	2.72055e-13
Sample: Falher A Member		Lat 54.035281		Long -119.048536		Datum NAD83		Beam Diameter: 22 µm
Sample Details		U (ppm)1	U/Th	Final 206Pb/238U (2σ)			Final 207Pb/235U (2σ)			Error Correlation	Final 207Pb/206Pb (2σ)			Apparent Age (Ma)				Concordia Age (Internal + External Errors)				Accepted Ages2
Sample	Spot			206/238	Int. (%)3	I+E (%)4	207/235	Int. (%)3	I+E (%)4		207/206	Int. (%)3	I+E (%)4	206Pb/ 238U	207Pb/ 235U	207Pb/ 206Pb	Disc (%)5	Age (Ma)	± Ma	MSWD	Prob. Fit	Age (Ma)	2σ (Ma)	2σ (%)
UK037	UK037_124	183	1.587	0.01572	5.08906	5.50911	0.140886	23.6314	23.7465	0.215352	0.065	23.0769	23.0986	100.549	133.833	774.336	87.0148	100.317	5.49271	5.0654	0.0244081	100.317	5.49271	5.47536
UK037	UK037_132	256	2.378	0.01657	4.28485	4.77616	0.0996117	22.2063	22.3287	0.192957	0.0436	21.789	21.8119	105.942	96.4178	-133.23	179.518	105.812	5.01121	0.899125	0.343017	105.812	5.01121	4.73596
UK037	UK037_3	406	2.033	0.01766	3.00113	3.66859	0.120774	15.6137	15.7873	0.192211	0.0496	15.3226	15.3552	112.85	115.774	176.291	35.9866	112.882	4.09971	0.118373	0.730806	112.882	4.09971	3.63185
UK037	UK037_11	573	3.3	0.01804	5.37694	5.77609	0.146754	19.4039	19.5439	0.277106	0.059	18.6441	18.6709	115.257	139.042	567.096	79.676	115.102	6.59639	3.71051	0.0540709	115.102	6.59639	5.73088
UK037	UK037_4	1171	2.74	0.01825	2.52055	3.28708	0.127074	8.88008	9.18192	0.283843	0.0505	8.51485	8.57337	116.586	121.465	218.073	46.5378	116.73	3.78596	0.926761	0.335706	116.73	3.78596	3.24333
UK037	UK037_60	450	0.906	0.02401	2.70721	3.4323	0.145993	13.8722	14.0673	0.195154	0.0441	13.6054	13.6421	152.95	138.368	-105.108	245.517	152.544	5.16457	2.6843	0.101342	152.544	5.16457	3.38563
UK037	UK037_24	418	1.419	0.025	4.4	4.87973	0.164077	19.6175	19.7559	0.22429	0.0476	19.1176	19.1438	159.179	154.266	79.4346	-100.39	159.111	7.66303	0.127473	0.721067	159.111	7.66303	4.81615
UK037	UK037_129	1389	2.18	0.02509	3.14866	3.79023	0.165014	17.0645	17.2235	0.184516	0.0477	16.7715	16.8013	159.745	155.082	84.4158	-89.2358	159.677	5.96996	0.146865	0.701549	159.677	5.96996	3.73877
UK037	UK037_15	261	1.552	0.02552	2.8605	3.55446	0.19388	15.1545	15.3333	0.188757	0.0551	14.882	14.9156	162.448	179.935	416.283	60.9765	162.582	5.6987	1.94798	0.162805	162.582	5.6987	3.50513
UK037	UK037_57	404	2.309	0.02598	2.77136	3.48313	0.183763	13.542	13.7418	0.20465	0.0513	13.2554	13.293	165.339	171.293	254.333	34.991	165.431	5.67628	0.312576	0.576104	165.431	5.67628	3.43122
UK037	UK037_146	216	1.402	0.0263	4.18251	4.68456	0.197268	15.466	15.6412	0.270433	0.0544	14.8897	14.9232	167.35	182.812	387.646	56.8292	167.452	7.73677	1.48333	0.223255	167.452	7.73677	4.6203
UK037	UK037_26	100.2	1.276	0.0264	5.68182	6.06092	0.229322	24.4781	24.5892	0.232119	0.063	23.8095	23.8305	167.978	209.639	708.231	76.2821	167.745	10.0465	3.24506	0.0716393	167.745	10.0465	5.98918
UK037	UK037_14	502	1.228	0.02645	2.26843	3.09799	0.169582	10.779	11.029	0.210449	0.0465	10.5376	10.585	168.292	159.056	23.6239	-612.378	167.96	5.11459	1.34951	0.245363	167.96	5.11459	3.04513
UK037	UK037_126	726	3.03	0.02698	2.22387	3.06551	0.180048	9.55978	9.84079	0.232628	0.0484	9.29752	9.35114	171.619	168.102	118.867	-44.3795	171.483	5.15937	0.223075	0.636707	171.483	5.15937	3.00868
UK037	UK037_143	490	1.112	0.02769	2.5641	3.3206	0.208839	9.84613	10.1192	0.260417	0.0547	9.5064	9.55885	176.075	192.578	399.981	55.9793	176.412	5.75643	3.63565	0.0565544	176.412	5.75643	3.26306
UK037	UK037_111	110.1	1.99	0.0378	4.2328	4.72952	0.312712	17.1958	17.3536	0.246154	0.06	16.6667	16.6966	239.182	276.281	603.575	60.3724	239.273	11.1042	3.20689	0.0733287	239.273	11.1042	4.64082
UK037	UK037_54	207	1.741	0.0387	2.37726	3.17854	0.291877	14.8172	15	0.16044	0.0547	14.6252	14.6594	244.77	260.036	399.981	38.8047	244.97	7.62081	0.793219	0.373129	244.97	7.62081	3.11092
UK037	UK037_152	213	2.83	0.0405	3.7037	4.26253	0.282557	14.5122	14.6988	0.255213	0.0506	14.0316	14.0672	255.931	252.684	222.65	-14.948	255.851	10.6668	0.0416373	0.838313	255.851	10.6668	4.16913
UK037	UK037_70	587	1.759	0.04504	1.62078	2.66058	0.316095	7.63953	7.98837	0.212157	0.0509	7.46562	7.53229	283.998	278.894	236.304	-20.1833	283.664	7.28411	0.280513	0.596365	283.664	7.28411	2.56786
UK037	UK037_47	481	1.417	0.04625	1.72973	2.72831	0.308007	9.67961	9.95724	0.178698	0.0483	9.52381	9.57617	291.457	272.635	113.989	-155.688	290.496	7.68276	2.56835	0.109022	290.496	7.68276	2.64471
UK037	UK037_113	1380	31.97	0.04642	1.22792	2.44121	0.351381	4.71638	5.2627	0.260352	0.0549	4.55373	4.66224	292.505	305.76	408.153	28.3345	294.087	6.77942	3.63716	0.0565032	294.087	6.77942	2.30525
UK037	UK037_72	181	0.749	0.0479	3.75783	4.30964	0.338808	16.61	16.7733	0.226239	0.0513	16.1793	16.2102	301.616	296.268	254.333	-18.591	301.5	12.6668	0.0649018	0.79891	301.5	12.6668	4.20126
UK037	UK037_84	164	0.693	0.0547	2.55941	3.31698	0.435175	14.4401	14.6276	0.177244	0.0577	14.2114	14.2466	343.313	366.845	518.389	33.7732	343.686	11.0661	1.09718	0.294885	343.686	11.0661	3.21982
UK037	UK037_83	230	1.667	0.0592	2.53378	3.29724	0.403227	13.3996	13.6015	0.189093	0.0494	13.1579	13.1958	370.758	343.986	166.86	-122.198	369.779	11.7968	1.91073	0.166882	369.779	11.7968	3.19024
UK037	UK037_77	580	1.87	0.0601	1.66389	2.68706	0.440018	7.3472	7.70928	0.226466	0.0531	7.15631	7.22584	376.234	370.265	333.072	-12.9586	375.768	9.646	0.254748	0.613752	375.768	9.646	2.56701
UK037	UK037_93	361	4.39	0.061	2.29508	3.11755	0.444925	9.91025	10.1816	0.231587	0.0529	9.64083	9.69256	381.704	373.719	324.51	-17.6248	381.3	11.4468	0.263027	0.608048	381.3	11.4468	3.00206
UK037	UK037_10	13.89	1.26	0.0625	8.8	9.04941	0.775575	42.0424	42.1072	0.209313	0.09	41.1111	41.1233	390.811	582.956	1425.53	72.5848	388.884	34.2665	3.66313	0.0556292	388.884	34.2665	8.8115
UK037	UK037_100	60.8	0.917	0.0624	5.12821	5.54529	0.550638	20.9498	21.0796	0.244785	0.064	20.3125	20.3371	390.205	445.414	741.63	47.3856	390.471	20.9921	2.12613	0.144806	390.471	20.9921	5.37608
UK037	UK037_90	215	1.799	0.0648	2.46914	3.24782	0.522676	12.3854	12.6035	0.199359	0.0585	12.1368	12.1779	404.751	426.937	548.538	26.2128	405.307	12.6932	1.03194	0.309703	405.307	12.6932	3.13174
UK037	UK037_110	184.7	1.352	0.0657	2.28311	3.10875	0.469241	11.6165	11.8489	0.196539	0.0518	11.39	11.4338	410.197	390.665	276.591	-48.3045	409.348	12.2475	1.0768	0.299416	409.348	12.2475	2.99196
UK037	UK037_108	308	2.137	0.0656	2.59146	3.34177	0.512847	9.53018	9.81204	0.271922	0.0567	9.17108	9.22543	409.592	420.362	479.884	14.6476	410.115	13.1642	0.428273	0.512837	410.115	13.1642	3.20988
UK037	UK037_103	160	1.75	0.066	3.18182	3.81781	0.486854	15.4709	15.6461	0.205665	0.0535	15.1402	15.1732	412.012	402.765	350.061	-17.697	411.759	15.1744	0.132077	0.716289	411.759	15.1744	3.68528
UK037	UK037_37	831	1.11	0.0664	1.28012	2.46788	0.52551	4.53963	5.1049	0.281988	0.0574	4.3554	4.46873	414.43	428.826	506.935	18.2478	416.558	9.54276	2.5867	0.107765	416.558	9.54276	2.29086
UK037	UK037_61	360	2.016	0.0683	2.34261	3.1527	0.548081	7.42396	7.78248	0.315547	0.0582	7.04467	7.1153	425.906	443.739	537.299	20.7321	427.166	12.8494	1.73529	0.187737	427.166	12.8494	3.00806
UK037	UK037_52	456	0.942	0.0724	1.65746	2.68308	0.577987	5.93559	6.37832	0.279241	0.0579	5.69948	5.78654	450.599	463.167	525.98	14.3316	451.921	11.4113	1.14933	0.283689	451.921	11.4113	2.52507
UK037	UK037_78	520	1.55	0.0728	1.64835	2.67746	0.582185	6.58883	6.99031	0.250174	0.058	6.37931	6.45721	453.003	465.864	529.762	14.4894	454.138	11.4845	0.982801	0.321508	454.138	11.4845	2.52885
UK037	UK037_45	234	1.018	0.0731	2.05198	2.94319	0.6249	9.26241	9.55218	0.221539	0.062	9.03226	9.08745	454.805	492.914	674.109	32.5324	456.32	12.8362	4.17396	0.0410498	456.32	12.8362	2.81297
UK037	UK037_5	304.3	1.056	0.0746	1.60858	2.65316	0.563664	8.0099	8.34327	0.200824	0.0548	7.84672	7.91018	463.81	453.909	404.072	-14.7839	463.066	11.654	0.426123	0.513898	463.066	11.654	2.51671
UK037	UK037_150	454	7.07	0.0755	1.8543	2.80895	0.581916	7.5653	7.91741	0.245107	0.0559	7.33453	7.40238	469.207	465.692	448.399	-4.64046	468.918	12.4841	0.0581788	0.809398	468.918	12.4841	2.66233
UK037	UK037_92	338	1.228	0.0759	1.44928	2.55971	0.592324	7.38737	7.74758	0.196183	0.0566	7.24382	7.31251	471.604	472.351	475.982	0.919866	471.663	11.4027	0.00260029	0.959331	471.663	11.4027	2.41756
UK037	UK037_106	125.6	1.574	0.0767	2.9987	3.66659	0.58905	12.5711	12.7861	0.238538	0.0557	12.2083	12.2491	476.395	470.261	440.43	-8.16595	476.14	16.7247	0.0684011	0.793679	476.14	16.7247	3.51257
UK037	UK037_22	484	1.622	0.0822	1.94647	2.87063	0.650556	6.0697	6.5033	0.320687	0.0574	5.74913	5.83545	509.241	508.821	506.935	-0.454957	509.188	13.6929	0.00110158	0.973523	509.188	13.6929	2.68917
UK037	UK037_94	265	2.406	0.0851	2.23267	3.0719	0.686415	8.83381	9.13717	0.252741	0.0585	8.54701	8.60531	526.492	530.644	548.538	4.01901	526.771	15.3294	0.0501186	0.822857	526.771	15.3294	2.91008
UK037	UK037_13	320	3.36	0.0889	1.91226	2.84754	0.668035	9.19194	9.48385	0.208037	0.0545	8.99083	9.04627	549.028	519.517	391.768	-40.1412	546.787	14.7131	2.42727	0.11924	546.787	14.7131	2.69082
UK037	UK037_9	264	1.236	0.0889	1.79978	2.77325	0.688873	7.5141	7.86851	0.23952	0.0562	7.29537	7.36359	549.028	532.123	460.278	-19.2818	547.366	14.2533	1.10653	0.292838	547.366	14.2533	2.60397
UK037	UK037_50	132.5	1.048	0.0889	2.92463	3.60628	0.693776	12.8806	13.0905	0.227057	0.0566	12.5442	12.584	549.028	535.067	475.982	-15.3464	548.387	18.8243	0.276533	0.598982	548.387	18.8243	3.43266
UK037	UK037_38	145	1.301	0.0905	2.43094	3.21888	0.688793	11.3149	11.5533	0.214843	0.0552	11.0507	11.0959	558.494	532.075	420.333	-32.8693	556.975	17.0141	1.28029	0.257846	556.975	17.0141	3.05473
UK037	UK037_96	192.7	1.594	0.0911	2.08562	2.96674	0.712201	7.86533	8.20458	0.265166	0.0567	7.58377	7.64942	562.039	546.052	479.884	-17.1198	560.491	15.6314	0.890958	0.345218	560.491	15.6314	2.78887
UK037	UK037_44	224	1.851	0.0927	1.83387	2.7955	0.80012	8.03943	8.37163	0.22811	0.0626	7.82748	7.8911	571.486	596.897	694.67	17.7328	573.224	15.0639	1.80847	0.178691	573.224	15.0639	2.62792
UK037	UK037_6	45.8	1.083	0.0934	3.64026	4.20752	0.862825	18.2766	18.4252	0.199175	0.067	17.9104	17.9383	575.614	631.664	837.774	31.2924	576.431	23.1312	1.6445	0.19971	576.431	23.1312	4.01283
UK037	UK037_95	268	1.937	0.0948	1.79325	2.76902	0.78949	7.98541	8.31977	0.224566	0.0604	7.78146	7.84545	583.863	590.882	617.935	5.51385	584.415	15.177	0.143116	0.705202	584.415	15.177	2.59696
UK037	UK037_42	246	1.153	0.0955	3.4555	4.04873	0.898026	12.088	12.3114	0.285862	0.0682	11.5836	11.6267	587.983	650.672	874.638	32.7741	589.915	22.6737	4.57312	0.0324774	589.915	22.6737	3.84355
UK037	UK037_147	204	1.88	0.0961	2.91363	3.59736	0.845367	9.24838	9.53857	0.315042	0.0638	8.77743	8.83421	591.513	622.103	735.007	19.5228	593.474	20.1366	2.01072	0.156191	593.474	20.1366	3.39301
UK037	UK037_136	451	0.93	0.0964	1.97095	2.88728	0.805473	6.41585	6.82751	0.307201	0.0606	6.10561	6.18696	593.277	599.911	625.066	5.08576	594.08	15.9467	0.191784	0.661436	594.08	15.9467	2.68428
UK037	UK037_118	1463	9.66	0.0963	2.18069	3.03432	0.841815	6.23008	6.65324	0.350026	0.0634	5.83596	5.92102	592.689	620.147	721.676	17.8732	595.87	16.8202	3.367	0.0665149	595.87	16.8202	2.82281
UK037	UK037_134	315	3.27	0.0968	1.65289	2.68026	0.826166	7.14063	7.51267	0.231477	0.0619	6.94669	7.0183	595.628	611.483	670.656	11.1871	597.064	14.9209	0.841278	0.359032	597.064	14.9209	2.49905
UK037	UK037_2	277	1.449	0.101	1.58416	2.63843	0.814664	7.35218	7.71403	0.215468	0.0585	7.17949	7.2488	620.267	605.067	548.538	-13.0763	618.688	15.1755	0.752158	0.385794	618.688	15.1755	2.45286
UK037	UK037_20	142.7	2.1	0.101	2.07921	2.96224	0.846694	11.0526	11.2965	0.188119	0.0608	10.8553	10.9012	620.267	622.833	632.166	1.88232	620.392	17.3314	0.00963989	0.921787	620.392	17.3314	2.79363
UK037	UK037_62	291.7	1.242	0.1039	1.73244	2.73003	0.838055	6.06467	6.49862	0.28566	0.0585	5.81197	5.89737	637.224	618.072	548.538	-16.1676	634.288	15.9332	1.66203	0.197329	634.288	15.9332	2.51199
UK037	UK037_144	68.7	1.096	0.1033	3.77541	4.32498	0.92722	15.52	15.6946	0.243261	0.0651	15.0538	15.0869	633.719	666.171	777.57	18.5	634.714	25.9963	0.731924	0.39226	634.714	25.9963	4.09575
UK037	UK037_34	137.2	1.703	0.1508	2.18833	3.03982	1.51576	5.90725	6.35196	0.370448	0.0729	5.48697	5.57735	905.446	936.767	1011.17	10.456	911.391	24.6104	2.69007	0.100975	911.391	24.6104	2.70032
UK037	UK037_133	682	4.81	0.1638	1.5873	2.64031	1.68482	3.58743	4.28035	0.442462	0.0746	3.21716	3.36899	977.86	1002.81	1057.74	7.55236	987.154	21.652	3.33615	0.0677731	987.154	21.652	2.19338
UK037	UK037_33	89.2	1.276	0.1663	2.10463	2.98013	1.60048	9.26792	9.55751	0.227088	0.0698	9.02579	9.08102	991.693	970.396	922.475	-7.50344	989.335	26.6045	0.516066	0.472525	989.335	26.6045	2.68913
UK037	UK037_27	150.3	2.632	0.1659	2.1097	2.98372	1.75903	6.83566	7.22343	0.308632	0.0769	6.50195	6.5784	989.482	1030.49	1118.6	11.5427	995.696	26.4005	3.04745	0.0808639	995.696	26.4005	2.65146
UK037	UK037_151	684	4.94	0.1685	1.54303	2.61394	1.71458	3.72241	4.39409	0.414524	0.0738	3.38753	3.53205	1003.84	1014	1036	3.10446	1007.6	21.8462	0.503359	0.478028	1007.6	21.8462	2.16813
UK037	UK037_104	59	4.82	0.1709	2.57461	3.32871	1.71779	12.3428	12.5617	0.208591	0.0729	12.0713	12.1127	1017.07	1015.2	1011.17	-0.582876	1016.94	30.7997	0.00217422	0.962809	1016.94	30.7997	3.02868
UK037	UK037_130	147	1.673	0.1712	2.21963	3.06243	1.77746	7.12734	7.50005	0.311424	0.0753	6.77291	6.84633	1018.72	1037.25	1076.52	5.36923	1021.74	27.7345	0.581716	0.445641	1021.74	27.7345	2.71444
UK037	UK037_51	259	2.257	0.1724	1.62413	2.66262	1.71623	4.85062	5.38333	0.334829	0.0722	4.57064	4.67875	1025.32	1014.62	991.584	-3.40238	1022.31	23.2275	0.369778	0.543125	1022.31	23.2275	2.27206
UK037	UK037_123	341	2.899	0.1721	1.62696	2.66435	1.76782	4.97173	5.49271	0.327243	0.0745	4.69799	4.80324	1023.67	1033.72	1055.04	2.97356	1026.24	23.4291	0.305147	0.580674	1026.24	23.4291	2.283
UK037	UK037_79	289	3.557	0.1741	1.49339	2.58495	1.82197	4.59715	5.15612	0.324852	0.0759	4.34783	4.46134	1034.66	1053.4	1092.43	5.28841	1039.77	22.7755	1.14878	0.283805	1039.77	22.7755	2.19043
UK037	UK037_120	93.3	1.554	0.1753	2.16771	3.02501	1.7741	8.06254	8.39383	0.268862	0.0734	7.76567	7.82979	1041.25	1036.02	1025.02	-1.58335	1040.5	28.0306	0.0369502	0.847566	1040.5	28.0306	2.69395
UK037	UK037_87	102	1.522	0.1786	2.29563	3.11796	1.78534	8.58835	8.90009	0.267296	0.0725	8.27586	8.33606	1059.32	1040.13	1000.01	-5.93113	1056.6	29.3619	0.447442	0.503552	1056.6	29.3619	2.77891
UK037	UK037_153	262	2.036	0.1778	1.5748	2.63282	1.84844	4.77636	5.31652	0.329708	0.0754	4.50928	4.61884	1054.94	1062.87	1079.18	2.24609	1057.13	23.6072	0.193845	0.659735	1057.13	23.6072	2.23314
UK037	UK037_35	198	1.387	0.1815	1.87328	2.82151	1.90442	5.58008	6.04888	0.335708	0.0761	5.25624	5.35052	1075.16	1082.64	1097.7	2.05324	1076.97	26.1474	0.135005	0.713298	1076.97	26.1474	2.42786
UK037	UK037_86	306	2.218	0.1824	1.31579	2.48657	1.92392	5.13864	5.64423	0.256058	0.0765	4.96732	5.06698	1080.07	1089.43	1108.19	2.53683	1082.28	22.8836	0.223955	0.636043	1082.28	22.8836	2.11438
UK037	UK037_81	495	3.675	0.1838	1.5778	2.63461	1.90068	3.80884	4.46755	0.414248	0.075	3.46667	3.60802	1087.7	1081.33	1068.5	-1.79685	1085.14	23.37	0.175266	0.675473	1085.14	23.37	2.15364
UK037	UK037_68	153.4	1.061	0.1836	2.28758	3.11204	1.95683	6.4963	6.90316	0.352136	0.0773	6.08021	6.16189	1086.61	1100.8	1128.94	3.74937	1089.63	29.5172	0.379304	0.537976	1089.63	29.5172	2.70891
UK037	UK037_73	345	3.58	0.1843	1.24797	2.45136	1.93634	4.50693	5.07584	0.276899	0.0762	4.33071	4.44466	1090.42	1093.73	1100.33	0.900349	1091.37	22.3127	0.0337512	0.854237	1091.37	22.3127	2.04447
UK037	UK037_145	232	2.313	0.1888	1.64195	2.67352	2.03829	5.36594	5.85193	0.305994	0.0783	5.10856	5.20551	1114.87	1128.39	1154.5	3.43217	1118.16	25.4683	0.434277	0.509898	1118.16	25.4683	2.27769
UK037	UK037_89	163.8	2.15	0.1902	1.47213	2.57273	2.00357	5.43863	5.91865	0.270681	0.0764	5.2356	5.33025	1122.46	1116.72	1105.57	-1.52745	1121.07	24.539	0.0761683	0.782559	1121.07	24.539	2.18888
UK037	UK037_58	81.1	2.614	0.1943	2.72774	3.44852	2.21286	8.10022	8.43002	0.336749	0.0826	7.62712	7.69239	1144.63	1185.12	1259.78	9.14075	1151.17	34.8651	1.90604	0.167404	1151.17	34.8651	3.02866
UK037	UK037_149	488	2.233	0.1936	1.54959	2.61781	2.19688	3.62823	4.31461	0.427091	0.0823	3.28068	3.4297	1140.85	1180.05	1252.67	8.92638	1156.48	24.3472	6.38012	0.0115406	1156.48	24.3472	2.10529
UK037	UK037_119	69.3	2.502	0.2021	2.42454	3.21405	2.30727	8.67887	8.98747	0.279361	0.0828	8.33333	8.39312	1186.59	1214.52	1264.51	6.16159	1190.48	33.6492	0.759403	0.383516	1190.48	33.6492	2.82652
UK037	UK037_74	166.5	1.326	0.2041	1.95982	2.8797	2.30477	6.29572	6.71475	0.311295	0.0819	5.98291	6.0659	1197.31	1213.76	1243.13	3.68574	1200.93	29.5928	0.462065	0.49666	1200.93	29.5928	2.46417
UK037	UK037_59	164	2.469	0.206	1.84466	2.80259	2.38019	5.67793	6.13927	0.324882	0.0838	5.36993	5.46225	1207.47	1236.67	1287.91	6.24592	1214.62	28.7861	1.67896	0.195063	1214.62	28.7861	2.36997
UK037	UK037_32	174	2.354	0.207	2.07729	2.96089	2.38319	4.89389	5.42235	0.424467	0.0835	4.43114	4.54257	1212.82	1237.57	1280.93	5.31754	1221.32	29.8412	1.62	0.203092	1221.32	29.8412	2.44337
UK037	UK037_139	331	2.48	0.2069	3.38328	3.98727	2.49329	7.65341	8.00165	0.442062	0.0874	6.86499	6.93744	1212.28	1270.09	1369.33	11.469	1225.98	41.92	4.25396	0.0391589	1225.98	41.92	3.4193
UK037	UK037_128	149.8	1.526	0.2279	1.79903	2.77277	2.86262	6.08959	6.52188	0.295428	0.0911	5.81778	5.9031	1323.48	1372.13	1448.69	8.64297	1334.46	31.0468	3.61543	0.0572458	1334.46	31.0468	2.32655
UK037	UK037_48	134.1	2.631	0.2307	1.64716	2.67673	2.74829	5.46259	5.94067	0.301535	0.0864	5.20833	5.30346	1338.17	1341.63	1347.15	0.666604	1339.16	29.5054	0.0223268	0.881221	1339.16	29.5054	2.20328
UK037	UK037_18	324	2.548	0.2399	1.33389	2.4962	2.8612	4.1508	4.76245	0.321357	0.0865	3.93064	4.05585	1386.18	1371.76	1349.38	-2.72699	1380.36	26.8766	0.543808	0.460859	1380.36	26.8766	1.94706
UK037	UK037_46	111.1	1.683	0.2483	2.01369	2.91662	3.14283	5.90924	6.35381	0.34077	0.0918	5.55556	5.64484	1429.7	1443.24	1463.25	2.2928	1433.75	34.1818	0.286206	0.592662	1433.75	34.1818	2.38409
UK037	UK037_125	312	2.13	0.2544	1.69025	2.70346	3.19899	3.89467	4.54094	0.433991	0.0912	3.50877	3.64849	1461.13	1456.92	1450.78	-0.713075	1458.99	29.8095	0.0504939	0.822206	1458.99	29.8095	2.04315
UK037	UK037_69	106.6	1.038	0.2559	1.91481	2.84925	3.14023	6.14846	6.57688	0.311429	0.089	5.8427	5.92766	1468.83	1442.61	1404.16	-4.60572	1460.94	33.9778	0.99994	0.317325	1460.94	33.9778	2.32576
UK037	UK037_19	169	0.861	0.26	2.61538	3.36035	3.14394	6.06599	6.49984	0.431156	0.0877	5.4732	5.56381	1489.84	1443.52	1375.92	-8.27963	1470.25	39.4342	3.38218	0.0659047	1470.25	39.4342	2.68214
UK037	UK037_41	110.4	1.682	0.2558	2.2283	3.06872	3.4529	5.38557	5.86993	0.413754	0.0979	4.90296	5.0039	1468.32	1516.53	1584.5	7.33262	1485.75	36.3404	4.11773	0.042436	1485.75	36.3404	2.44593
UK037	UK037_76	232	2.121	0.2608	1.61043	2.65428	3.29385	4.3485	4.9357	0.370342	0.0916	4.0393	4.16124	1493.93	1479.6	1459.11	-2.38685	1487.62	30.3627	0.478885	0.488928	1487.62	30.3627	2.04103
UK037	UK037_64	289	1.598	0.2675	1.15888	2.40723	3.60346	3.18648	3.95036	0.363687	0.0977	2.96827	3.13219	1528.1	1550.3	1580.68	3.32638	1539.75	26.5832	1.49788	0.220998	1539.75	26.5832	1.72646
UK037	UK037_116	227	1.679	0.2815	1.7762	2.75801	3.97059	4.02942	4.65703	0.440808	0.1023	3.61681	3.75251	1598.91	1628.21	1666.27	4.04222	1614.07	32.785	2.06743	0.150475	1614.07	32.785	2.0312
UK037	UK037_30	91.7	1.304	0.2824	1.77054	2.75437	4.07284	5.82075	6.27159	0.304177	0.1046	5.54493	5.63438	1603.44	1648.88	1707.29	6.08303	1616.93	35.4883	2.7641	0.096401	1616.93	35.4883	2.19479
UK037	UK037_12	405	18.13	0.2963	1.18124	2.41807	4.05679	3.05716	3.84681	0.386383	0.0993	2.81974	2.99181	1672.94	1645.66	1611.01	-3.84415	1656.24	27.4876	2.14794	0.142761	1656.24	27.4876	1.65964
UK037	UK037_80	215.1	4.07	0.2973	1.47999	2.57723	4.09097	3.80651	4.46556	0.388804	0.0998	3.50701	3.6468	1677.91	1652.5	1620.36	-3.55155	1664.06	30.8527	1.52586	0.216735	1664.06	30.8527	1.85407
UK037	UK037_67	168.5	2.227	0.297	1.71717	2.72037	4.30388	4.43709	5.01393	0.387004	0.1051	4.09134	4.21178	1676.42	1694.1	1716.06	2.3105	1684.72	34.0331	0.61243	0.433874	1684.72	34.0331	2.0201
UK037	UK037_82	380	2.75	0.3019	1.35807	2.5092	4.24169	3.15335	3.92369	0.430673	0.1019	2.84593	3.01651	1700.72	1682.13	1659.01	-2.51405	1688.88	29.0165	0.985976	0.320728	1688.88	29.0165	1.71809
UK037	UK037_101	270	0.6906	0.2978	1.14171	2.39901	4.31548	2.98615	3.79062	0.382334	0.1051	2.75928	2.9349	1680.39	1696.32	1716.06	2.07887	1689.9	27.5929	0.730358	0.392767	1689.9	27.5929	1.63282
UK037	UK037_135	113	0.721	0.3039	2.86278	3.5563	4.17341	6.48893	6.89623	0.441179	0.0996	5.82329	5.90853	1710.62	1668.82	1616.62	-5.81426	1690.99	46.1804	2.08855	0.148407	1690.99	46.1804	2.73096
UK037	UK037_138	106.9	1.042	0.3039	2.46792	3.2469	4.44158	4.82918	5.36402	0.511043	0.106	4.15094	4.2697	1710.62	1720.13	1731.73	1.2188	1716.23	40.3785	0.168944	0.681052	1716.23	40.3785	2.35274
UK037	UK037_8	566	1.982	0.307	1.23779	2.44619	4.61811	2.60441	3.49781	0.475264	0.1091	2.29148	2.50017	1725.93	1752.55	1784.44	3.27914	1744.81	27.6331	2.36895	0.12377	1744.81	27.6331	1.58373
UK037	UK037_107	287	4.99	0.3138	1.62524	2.66329	4.59493	3.50671	4.21292	0.463466	0.1062	3.10734	3.26429	1759.38	1748.35	1735.18	-1.39444	1752.26	32.0445	0.308192	0.578792	1752.26	32.0445	1.82875
UK037	UK037_17	150.8	1.973	0.3169	1.67245	2.69237	4.80636	4.58839	5.1483	0.364497	0.11	4.27273	4.38819	1774.57	1786.01	1799.4	1.37994	1779.92	35.1805	0.227028	0.633736	1779.92	35.1805	1.97652
UK037	UK037_39	180	1.991	0.3241	1.32675	2.49239	4.73234	3.82572	4.48195	0.346798	0.1059	3.58829	3.72503	1809.72	1772.99	1729.99	-4.60856	1789.61	31.2837	2.80876	0.0937509	1789.61	31.2837	1.74807
UK037	UK037_71	60.5	2.36	0.3234	2.31911	3.13528	4.75779	6.87	7.25593	0.337571	0.1067	6.46673	6.54359	1806.31	1777.48	1743.79	-3.58524	1796	43.881	0.816968	0.366068	1796	43.881	2.44327
UK037	UK037_1	527.8	6	0.3214	1.46235	2.56714	5.09618	2.99061	3.79414	0.488981	0.115	2.6087	2.7938	1796.56	1835.47	1879.88	4.43228	1823.7	30.5435	4.35578	0.0368835	1823.7	30.5435	1.67481
UK037	UK037_137	480	3.538	0.3266	1.25536	2.45513	5.03453	2.64277	3.52647	0.475015	0.1118	2.32558	2.53147	1821.88	1825.15	1828.88	0.382773	1824.3	28.3713	0.0327555	0.856379	1824.3	28.3713	1.55519
UK037	UK037_65	27.6	0.865	0.327	3.97554	4.50073	5.05873	9.5966	9.87656	0.414265	0.1122	8.7344	8.79146	1823.82	1829.21	1835.35	0.628169	1825.79	64.4468	0.0161861	0.898762	1825.79	64.4468	3.5298
UK037	UK037_98	169.4	3.93	0.3376	1.74763	2.7397	5.0598	3.99086	4.62371	0.437909	0.1087	3.58786	3.72461	1875.11	1829.39	1777.74	-5.47718	1846.37	34.8811	4.21064	0.0401711	1846.37	34.8811	1.88917
UK037	UK037_97	908	22.5	0.3318	2.29054	3.11421	5.33428	4.7861	5.32527	0.478581	0.1166	4.2024	4.31974	1847.1	1874.37	1904.74	3.02625	1862.87	41.0897	1.23829	0.265802	1862.87	41.0897	2.20572
UK037	UK037_148	314	1.549	0.3344	1.4055	2.53519	5.36686	2.93565	3.75097	0.478771	0.1164	2.57732	2.76452	1859.67	1879.58	1901.66	2.20781	1873.96	30.4277	1.09433	0.295514	1873.96	30.4277	1.62371
UK037	UK037_43	950	2.232	0.332	0.933735	2.30729	5.40616	2.00841	3.07984	0.464914	0.1181	1.77815	2.04006	1848.07	1885.83	1927.67	4.1296	1877.67	25.5568	4.9222	0.0265138	1877.67	25.5568	1.36109
UK037	UK037_85	254	3.56	0.3362	2.23081	3.07055	5.49773	5.07025	5.58204	0.439981	0.1186	4.55312	4.66164	1868.36	1900.24	1935.24	3.4557	1884.95	41.7205	1.50914	0.21927	1884.95	41.7205	2.21335
UK037	UK037_23	158	1.74	0.3482	1.92418	2.85556	5.28108	4.43875	5.0154	0.433497	0.11	4	4.12311	1926	1865.81	1799.4	-7.03538	1889.11	37.5759	6.25967	0.0123517	1889.11	37.5759	1.98908
UK037	UK037_121	318	0.89	0.3488	1.31881	2.48817	5.76149	3.05402	3.84432	0.431827	0.1198	2.75459	2.93049	1928.87	1940.64	1953.24	1.24783	1936.93	30.8374	0.339209	0.560286	1936.93	30.8374	1.59208
UK037	UK037_21	367	1.569	0.3696	1.13636	2.39647	6.27323	2.83704	3.67431	0.400546	0.1231	2.59951	2.78522	2027.52	2014.72	2001.64	-1.29303	2018.43	29.758	0.385458	0.534697	2018.43	29.758	1.47431
UK037	UK037_115	53.2	0.707	0.3771	2.30708	3.1264	7.02966	6.00796	6.44572	0.384004	0.1352	5.54734	5.63675	2062.72	2115.19	2166.59	4.79423	2086.21	47.2718	2.78523	0.0951368	2086.21	47.2718	2.26592
UK037	UK037_16	184.3	1.472	0.3829	1.51476	2.59735	6.83158	3.37315	4.10242	0.449063	0.1294	3.01391	3.17548	2089.82	2089.82	2089.83	0.000798034	2089.82	34.0271	1.44301e-07	0.999697	2089.82	34.0271	1.62823
UK037	UK037_117	134.7	1.558	0.3789	1.66271	2.68632	7.07367	3.9826	4.61658	0.417493	0.1354	3.61891	3.75453	2071.14	2120.74	2169.17	4.51912	2101.28	37.2447	4.22379	0.0398611	2101.28	37.2447	1.77248
UK037	UK037_63	47.8	0.925	0.39	2.82051	3.52236	7.12495	6.32417	6.74143	0.445989	0.1325	5.66038	5.74803	2122.83	2127.17	2131.36	0.400309	2125.22	52.5453	0.0176934	0.89418	2125.22	52.5453	2.47246
UK037	UK037_40	86.4	1.095	0.3866	1.70719	2.71408	7.47328	4.08302	4.70349	0.418119	0.1402	3.70899	3.84143	2107.04	2169.79	2229.68	5.50031	2144.86	38.3059	6.4304	0.0112183	2144.86	38.3059	1.78594
UK037	UK037_109	66.2	1.328	0.495	3.23232	3.86001	12.9198	5.92501	6.36847	0.545539	0.1893	4.96566	5.06535	2592.27	2673.82	2736.09	5.25632	2657.39	59.2943	5.35433	0.0206709	2657.39	59.2943	2.23129
UK037	UK037_49	206.9	0.904	0.5099	1.66699	2.68898	13.0908	3.16064	3.92955	0.527423	0.1862	2.68528	2.86544	2656.2	2686.22	2708.88	1.94478	2683.35	36.8639	1.43977	0.230176	2683.35	36.8639	1.3738
UK037	UK037_75	106.3	2.86	0.521	1.91939	2.85233	13.0453	3.77351	4.43747	0.508647	0.1816	3.2489	3.39932	2703.42	2682.94	2667.54	-1.34518	2685.64	41.1007	0.551545	0.457687	2685.64	41.1007	1.53039
UK037	UK037_28	151.4	2.043	0.5196	1.5204	2.60064	13.347	2.85413	3.68752	0.532702	0.1863	2.41546	2.61428	2697.48	2704.51	2709.77	0.453415	2704.06	34.709	0.0834121	0.772726	2704.06	34.709	1.28359
UK037	UK037_88	180	9.37	0.523	1.587	2.64013	13.3983	2.89559	3.7197	0.548074	0.1858	2.42196	2.62028	2711.89	2708.14	2705.34	-0.242295	2708.31	35.0702	0.0234892	0.878192	2708.31	35.0702	1.29491
UK037	UK037_127	115.5	0.882	0.5237	1.75673	2.74551	13.474	3.33967	4.07494	0.526019	0.1866	2.8403	3.0112	2714.85	2713.46	2712.42	-0.0895561	2713.59	38.2117	0.0028521	0.957409	2713.59	38.2117	1.40816
UK037	UK037_31	252	1.025	0.5191	1.46407	2.56812	13.5918	2.35381	3.31544	0.622	0.1899	1.84308	2.09688	2695.36	2721.69	2741.3	1.67562	2723.26	31.1979	1.4093	0.235173	2723.26	31.1979	1.14561
UK037	UK037_66	314	4.61	0.5181	1.65991	2.68459	13.5656	2.32812	3.29726	0.712982	0.1899	1.63244	1.91438	2691.12	2719.87	2741.3	1.83047	2725.21	29.991	1.81222	0.178242	2725.21	29.991	1.1005
UK037	UK037_29	281	4.22	0.531	2.25989	3.09173	14.5989	3.15852	3.92785	0.715489	0.1994	2.20662	2.42264	2745.66	2789.46	2821.29	2.68061	2797.46	35.918	3.11987	0.077343	2797.46	35.918	1.28395
UK037	UK037_105	150	3.17	0.5475	1.60731	2.65239	15.1809	2.44307	3.3794	0.657904	0.2011	1.83988	2.09408	2814.77	2826.66	2835.14	0.718754	2828.02	31.7138	0.26556	0.606326	2828.02	31.7138	1.12141
UK037	UK037_91	55.3	1.626	0.648	2.16049	3.01985	23.239	4.24359	4.84353	0.509119	0.2601	3.65244	3.78686	3220.39	3237	3247.31	0.829159	3235.51	46.8449	0.251055	0.616333	3235.51	46.8449	1.44783
UK037	UK037_7	615	1.479	0.1649	1.2735	2.46445	1.77571	3.0914	3.87408	0.411949	0.0781	2.8169	2.98914	983.95	1036.61	1149.42	14.3958	1003.98	20.0949	16.1973	5.7076e-05
UK037	UK037_25	197.9	0.929	0.061	2.62295	3.36625	0.529873	9.72546	10.0018	0.269699	0.063	9.36508	9.41832	381.704	431.725	708.231	46.1045	382.973	12.4424	8.26492	0.00404185
UK037	UK037_36	208	1.767	0.2036	2.30845	3.12741	2.7539	5.41018	5.89252	0.426686	0.0981	4.89297	4.99411	1194.63	1343.14	1588.32	24.7864	1226.41	32.5908	44.9284	2.04375e-11
UK037	UK037_53	1053	18.4	0.2947	1.05192	2.3576	4.35182	1.82712	2.96481	0.575725	0.1071	1.49393	1.79773	1664.97	1703.24	1750.65	4.89372	1697.72	24.2626	7.16173	0.00744755
UK037	UK037_55	160.6	2.937	0.3504	1.5411	2.6128	6.27588	3.86199	4.51295	0.399042	0.1299	3.54119	3.67967	1936.51	2015.09	2096.61	7.63626	1980.07	35.196	11.6752	0.000633403
UK037	UK037_56	878	0.897	0.0766	2.48042	3.25641	0.681224	5.54674	6.01815	0.447184	0.0645	4.96124	5.06102	475.796	527.514	758.068	37.2357	480.577	14.7735	20.3231	6.54067e-06
UK037	UK037_99	743	11.57	0.05867	1.39765	2.53084	0.525812	6.61097	7.01118	0.211413	0.065	6.46154	6.53846	367.532	429.027	774.336	52.5359	370.61	8.95046	24.2999	8.24434e-07
UK037	UK037_102	264	2.047	0.179	2.01117	2.91488	2.00653	4.86337	5.39482	0.413535	0.0813	4.42804	4.53956	1061.51	1117.72	1228.71	13.6075	1076.67	26.719	9.54547	0.00200444
UK037	UK037_112	354	3.71	0.2478	1.37207	2.51681	3.39958	3.31259	4.05278	0.4142	0.0995	3.01508	3.17658	1427.12	1504.3	1614.75	11.62	1464.03	27.3639	19.5222	9.94359e-06
UK037	UK037_114	496	3.324	0.2725	1.2844	2.47011	4.00521	2.59201	3.48859	0.495524	0.1066	2.25141	2.4635	1553.48	1635.25	1742.08	10.8259	1606.51	26.8637	26.4326	2.72893e-07
UK037	UK037_122	136.1	1.365	0.1364	2.78592	3.49473	1.82802	7.33942	7.70188	0.379583	0.0972	6.79012	6.86336	824.273	1055.57	1571.08	47.5345	830.534	26.9771	78.0413	1.00907e-18
UK037	UK037_131	1860	4.84	0.0474	2.32068	3.13644	0.404548	5.22824	5.72593	0.443873	0.0619	4.68498	4.79051	298.539	344.942	670.656	55.4855	300.964	9.11107	36.2671	1.72043e-09
UK037	UK037_140	877	0.636	0.1541	2.33615	3.14791	1.67854	4.24496	4.84473	0.550334	0.079	3.5443	3.68267	923.905	1000.43	1172.13	21.1776	947.378	25.5884	29.642	5.19665e-08
UK037	UK037_141	423	2.235	0.4643	1.44303	2.55618	14.1351	2.24594	3.23975	0.642508	0.2208	1.72101	1.99045	2458.52	2758.81	2986.53	17.68	2768.4	30.4081	235.464	3.83464e-53
UK037	UK037_142	298	2.741	0.4131	1.45243	2.5615	8.5893	2.62647	3.51427	0.552998	0.1508	2.18833	2.40599	2229.08	2295.42	2355.02	5.34767	2287.91	31.8699	10.7806	0.00102569
Sample: Notikewin Member		Lat 54.018585		Long -119.068777		Datum NAD83		Beam Diameter: 22 µm
Sample Details		U (ppm)1	U/Th	Final 206Pb/238U (2σ)			Final 207Pb/235U (2σ)			Error Correlation	Final 207Pb/206Pb (2σ)			Apparent Age (Ma)				Concordia Age (Internal + External Errors)				Accepted Ages2
Sample	Spot			206/238	Int. (%)3	I+E (%)4	207/235	Int. (%)3	I+E (%)4		207/206	Int. (%)3	I+E (%)4	206Pb/ 238U	207Pb/ 235U	207Pb/ 206Pb	Disc (%)5	Age (Ma)	± Ma	MSWD	Prob. Fit	Age (Ma)	2σ (Ma)	2σ (%)
UK038	UK038_1	514	1.759	0.01663	2.76609	3.88393	0.125195	10.6229	11.0127	0.26039	0.0546	10.2564	10.305	106.322	119.771	395.88	73.1428	106.625	4.0863	4.92555	0.0264624	106.625	4.0863	3.83239
UK038	UK038_119	327	1.898	0.01684	3.20665	4.20907	0.0900897	19.8484	20.0597	0.161557	0.0388	19.5876	19.6131	107.654	87.5869	-430.248	125.021	107.047	4.46607	5.87947	0.0153184	107.047	4.46607	4.17206
UK038	UK038_23	370	2.435	0.01687	3.08239	4.1152	0.125606	15.4949	15.7647	0.19893	0.054	15.1852	15.2181	107.844	120.142	371.05	70.9355	107.983	4.39644	1.94635	0.162981	107.983	4.39644	4.07141
UK038	UK038_50	643	1.879	0.01715	2.62391	3.78399	0.116577	12.6484	12.9775	0.20745	0.0493	12.3732	12.4136	109.619	111.964	162.123	32.3855	109.685	4.09523	0.120144	0.728879	109.685	4.09523	3.73365
UK038	UK038_26	245	1.979	0.01717	3.72743	4.61816	0.120737	21.8883	22.0802	0.170293	0.051	21.5686	21.5918	109.745	115.74	240.83	54.4303	109.792	5.02184	0.251942	0.615711	109.792	5.02184	4.57395
UK038	UK038_6	234.4	1.937	0.01721	3.48635	4.42587	0.121256	18.9151	19.1367	0.184316	0.0511	18.591	18.6179	109.999	116.21	245.343	55.1653	110.064	4.82222	0.35883	0.549157	110.064	4.82222	4.38131
UK038	UK038_87	437	1.732	0.01747	2.63309	3.79036	0.114657	12.2609	12.6001	0.214755	0.0476	11.9748	12.0165	111.646	110.217	79.4346	-40.5513	111.597	4.1716	0.0490065	0.824801	111.597	4.1716	3.73809
UK038	UK038_30	829	3.012	0.01758	2.10466	3.44431	0.125075	9.91586	10.3324	0.212252	0.0516	9.68992	9.74139	112.343	119.662	267.725	58.0377	112.627	3.80977	1.61557	0.203711	112.627	3.80977	3.38265
UK038	UK038_121	160	3.92	0.0179	5.58659	6.21641	0.130807	30.7012	30.8383	0.181966	0.053	30.1887	30.2052	114.37	124.822	328.797	65.2155	114.392	7.04659	0.340921	0.559298	114.392	7.04659	6.16001
UK038	UK038_93	181	3.4	0.01802	4.71698	5.44827	0.146591	24.1931	24.3668	0.194972	0.059	23.7288	23.7499	115.13	138.898	567.096	79.6983	115.116	6.2169	2.29327	0.129936	115.116	6.2169	5.40056
UK038	UK038_69	193.6	2.562	0.01923	3.84815	4.71614	0.108709	27.1038	27.259	0.141978	0.041	26.8293	26.8479	122.788	104.784	-287.602	142.694	122.503	5.72071	1.81897	0.177436	122.503	5.72071	4.66986
UK038	UK038_138	221	2.41	0.0238	5.04202	5.73198	0.187048	31.9789	32.1105	0.157667	0.057	31.5789	31.5948	151.627	174.107	491.533	69.1522	151.65	8.58965	0.768149	0.38079	151.65	8.58965	5.66414
UK038	UK038_120	1000	1.279	0.02444	1.88216	3.31304	0.150966	9.56207	9.99334	0.196836	0.0448	9.375	9.42818	155.656	142.765	-66.5181	334.005	154.707	5.0023	3.80949	0.050963	154.707	5.0023	3.2334
UK038	UK038_57	78.5	2.044	0.0245	4.89796	5.60568	0.256733	29.3588	29.5021	0.166831	0.076	28.9474	28.9646	156.033	232.03	1095.07	85.7513	155.653	8.63654	5.88294	0.0152883	155.653	8.63654	5.5486
UK038	UK038_2	1009	1.856	0.02438	1.68171	3.20341	0.175135	6.73911	7.33821	0.249544	0.0521	6.52591	6.60208	155.278	163.866	289.801	46.419	156.015	4.82265	2.43608	0.118572	156.015	4.82265	3.09114
UK038	UK038_54	498	0.913	0.02463	2.51726	3.71083	0.159951	10.7036	11.0906	0.235178	0.0471	10.4034	10.4513	156.851	150.66	54.3003	-188.859	156.524	5.69402	0.663937	0.415173	156.524	5.69402	3.6378
UK038	UK038_88	736	1.883	0.0247	2.67206	3.81754	0.186629	9.68257	10.1087	0.275966	0.0548	9.30657	9.36014	157.292	173.749	404.072	61.0734	157.844	5.90804	4.39252	0.0360969	157.844	5.90804	3.74296
UK038	UK038_31	761	1.446	0.02481	1.81378	3.27468	0.166935	10.2035	10.6087	0.177761	0.0488	10.041	10.0907	157.984	156.756	138.233	-14.288	157.92	5.04896	0.0256368	0.87279	157.92	5.04896	3.19716
UK038	UK038_61	380	1.657	0.0248	3.02419	4.07179	0.172339	14.0205	14.3181	0.215698	0.0504	13.6905	13.7269	157.921	161.447	213.483	26.0265	158.009	6.33051	0.113021	0.73673	158.009	6.33051	4.00643
UK038	UK038_128	958	1.657	0.02485	2.05231	3.41258	0.167547	9.82812	10.2482	0.208821	0.0489	9.61145	9.66333	158.235	157.288	143.039	-10.6239	158.184	5.27359	0.0164741	0.897871	158.184	5.27359	3.33383
UK038	UK038_62	525	1.016	0.02485	2.53521	3.72303	0.16789	12.9045	13.2273	0.196459	0.049	12.6531	12.6925	158.235	157.586	147.831	-7.03803	158.214	5.78629	0.00465912	0.94558	158.214	5.78629	3.65725
UK038	UK038_129	783	1.99	0.025	2.12	3.45371	0.173384	10.7479	11.1334	0.197247	0.0503	10.5368	10.5841	159.179	162.352	208.88	23.7942	159.312	5.38524	0.147217	0.701209	159.312	5.38524	3.3803
UK038	UK038_99	420	1.629	0.02513	2.22841	3.52129	0.18468	12.0281	12.3737	0.185267	0.0533	11.8199	11.8621	159.996	172.08	341.589	53.1612	160.331	5.53819	1.54342	0.214109	160.331	5.53819	3.45422
UK038	UK038_27	631	2.305	0.02532	1.77725	3.25458	0.159893	10.8453	11.2274	0.163873	0.0458	10.6987	10.7453	161.191	150.61	-12.9009	1349.45	160.599	5.10704	1.82916	0.176227	160.599	5.10704	3.17999
UK038	UK038_114	687	1.941	0.02517	2.18514	3.49407	0.183586	10.4392	10.8356	0.209321	0.0529	10.2079	10.2568	160.248	171.142	324.51	50.6185	160.652	5.49428	1.66492	0.196941	160.652	5.49428	3.42
UK038	UK038_45	170.2	1.367	0.0253	3.95257	4.80172	0.162209	18.9123	19.1339	0.208995	0.0465	18.4946	18.5216	161.065	152.635	23.6239	-581.789	160.879	7.61594	0.40529	0.52437	160.879	7.61594	4.73395
UK038	UK038_25	259	1.924	0.02525	2.89109	3.97393	0.208192	13.6868	13.9915	0.211233	0.0598	13.3779	13.4152	160.751	192.034	596.346	73.044	161.072	6.30387	6.61976	0.0100854	161.072	6.30387	3.91369
UK038	UK038_42	372	1.978	0.02537	2.75916	3.879	0.189243	11.4286	11.7918	0.241425	0.0541	11.0906	11.1356	161.505	175.983	375.215	56.9565	161.893	6.1663	2.40197	0.121182	161.893	6.1663	3.80886
UK038	UK038_147	489	2.54	0.02546	2.74941	3.87207	0.174468	13.5613	13.8688	0.202739	0.0497	13.2797	13.3173	162.071	163.289	180.987	10.4514	162.106	6.16939	0.0139984	0.905818	162.106	6.16939	3.80578
UK038	UK038_19	449.9	1.167	0.0255	2.19608	3.50092	0.169468	12.8447	13.1689	0.170971	0.0482	12.6556	12.695	162.323	158.957	109.097	-48.7871	162.204	5.57106	0.122885	0.725926	162.204	5.57106	3.4346
UK038	UK038_5	582	2.464	0.02538	2.20646	3.50744	0.194216	9.27527	9.71928	0.237886	0.0555	9.00901	9.06434	161.568	180.221	432.421	62.6364	162.275	5.56367	5.55803	0.0183961	162.275	5.56367	3.42854
UK038	UK038_59	928	2.235	0.02543	2.04483	3.40808	0.180924	6.89914	7.48544	0.296389	0.0516	6.58915	6.6646	161.883	168.856	267.725	39.5339	162.465	5.36502	1.5147	0.218423	162.465	5.36502	3.30226
UK038	UK038_53	266	2.112	0.0257	3.22957	4.22656	0.158395	16.2087	16.4668	0.19925	0.0447	15.8837	15.9151	163.58	149.297	-71.9764	327.269	163.122	6.78956	1.63042	0.201646	163.122	6.78956	4.16226
UK038	UK038_49	573	1.227	0.02579	2.32648	3.58416	0.164639	9.36486	9.80481	0.248427	0.0463	9.07127	9.12623	164.145	154.756	13.2704	-1136.93	163.469	5.72419	1.85915	0.172722	163.469	5.72419	3.5017
UK038	UK038_154	140.3	1.651	0.02582	3.83424	4.70479	0.170883	25.2923	25.4585	0.151597	0.048	25	25.02	164.334	160.185	99.2691	-65.5438	164.29	7.62353	0.0495829	0.823791	164.29	7.62353	4.6403
UK038	UK038_84	563	2.124	0.02578	1.74554	3.23737	0.180216	9.23936	9.68502	0.188924	0.0507	9.07298	9.12792	164.083	168.246	227.214	27.785	164.316	5.17732	0.30947	0.578005	164.316	5.17732	3.15084
UK038	UK038_118	551	1.428	0.02576	2.13509	3.46299	0.187534	9.15399	9.60361	0.233242	0.0528	8.90152	8.95751	163.957	174.523	320.212	48.7974	164.463	5.55842	1.93794	0.163892	164.463	5.55842	3.37974
UK038	UK038_35	250	2.146	0.02597	3.00347	4.05641	0.156478	17.6487	17.8861	0.17018	0.0437	17.3913	17.42	165.276	147.616	-127.567	229.56	164.769	6.58319	2.14126	0.143384	164.769	6.58319	3.9954
UK038	UK038_41	453	1.264	0.02598	2.50192	3.70045	0.1723	14.9714	15.2505	0.167113	0.0481	14.7609	14.7947	165.339	161.413	104.191	-58.6893	165.234	6.01019	0.121694	0.727205	165.234	6.01019	3.63739
UK038	UK038_15	271	2.061	0.02595	2.31214	3.57487	0.182477	13.7256	14.0294	0.168455	0.051	13.5294	13.5663	165.151	170.19	240.83	31.4243	165.28	5.8017	0.213264	0.644221	165.28	5.8017	3.51022
UK038	UK038_97	263	2.604	0.02604	2.84178	3.9382	0.172698	16.0539	16.3145	0.177015	0.0481	15.8004	15.832	165.716	161.758	104.191	-59.0512	165.622	6.4175	0.108286	0.742104	165.622	6.4175	3.87479
UK038	UK038_52	485	3.963	0.02607	2.18642	3.49487	0.172897	12.0503	12.3953	0.181441	0.0481	11.8503	11.8924	165.905	161.93	104.191	-59.2321	165.744	5.67625	0.187396	0.665092	165.744	5.67625	3.4247
UK038	UK038_74	262.7	1.65	0.02617	2.86588	3.95562	0.160209	14.255	14.5478	0.201043	0.0444	13.964	13.9997	166.533	150.886	-88.4595	288.259	165.901	6.45338	2.45246	0.117341	165.901	6.45338	3.88991
UK038	UK038_36	250	1.723	0.0262	2.70992	3.84414	0.152084	17.3155	17.5573	0.156503	0.0421	17.1021	17.1313	166.721	143.751	-220.551	175.593	165.975	6.28264	3.93957	0.0471629	165.975	6.28264	3.7853
UK038	UK038_112	533	2.197	0.02622	2.13577	3.46341	0.1663	10.6511	11.0399	0.200521	0.046	10.4348	10.4826	166.847	156.203	-2.38264	7102.62	166.227	5.63046	1.81923	0.177404	166.227	5.63046	3.38721
UK038	UK038_148	651	2.007	0.02615	1.8738	3.3083	0.187489	10.931	11.3102	0.171421	0.052	10.7692	10.8156	166.407	174.485	285.41	41.6953	166.715	5.39062	0.798279	0.371608	166.715	5.39062	3.23343
UK038	UK038_104	400	1.374	0.02617	2.40734	3.63716	0.187272	11.8087	12.1605	0.203862	0.0519	11.5607	11.6039	166.533	174.299	281.007	40.737	166.78	5.94779	0.651548	0.41956	166.78	5.94779	3.56624
UK038	UK038_63	1064	1.94	0.02641	1.62817	3.17563	0.167141	7.58424	8.12123	0.214678	0.0459	7.40741	7.4746	168.04	156.935	-7.63342	2301.38	166.877	5.12115	3.54274	0.0598068	166.877	5.12115	3.06882
UK038	UK038_117	352	1.888	0.02615	2.5239	3.71534	0.202993	11.6445	12.0012	0.216746	0.0563	11.3677	11.4116	166.407	187.656	464.219	64.1533	166.89	6.08554	4.36423	0.0367011	166.89	6.08554	3.64645
UK038	UK038_140	195	1.714	0.02623	3.43119	4.38255	0.209762	20.9722	21.1724	0.163606	0.058	20.6897	20.7138	166.91	193.353	529.762	68.4934	167.04	7.21853	2.01398	0.155855	167.04	7.21853	4.32142
UK038	UK038_40	309	3.083	0.02639	3.25881	4.24894	0.160101	16.2394	16.4971	0.200673	0.044	15.9091	15.9405	167.915	150.791	-110.694	251.693	167.325	6.99994	2.29727	0.129601	167.325	6.99994	4.18345
UK038	UK038_111	141.6	1.921	0.02629	3.72765	4.61834	0.188493	23.3761	23.5558	0.159465	0.052	23.0769	23.0986	167.287	175.343	285.41	41.3872	167.353	7.62016	0.18334	0.668519	167.353	7.62016	4.55335
UK038	UK038_22	419	1.725	0.02629	2.32027	3.58013	0.186318	11.5201	11.8805	0.20141	0.0514	11.284	11.3283	167.287	173.483	258.809	35.3629	167.503	5.87572	0.437776	0.508198	167.503	5.87572	3.50784
UK038	UK038_76	444	2.038	0.02645	2.45747	3.67054	0.174688	13.9961	14.2942	0.175582	0.0479	13.7787	13.8149	168.292	163.479	94.3329	-78.4019	168.141	6.06091	0.203703	0.651748	168.141	6.06091	3.60465
UK038	UK038_130	1280	1.246	0.02642	1.81681	3.27635	0.181775	8.80667	9.27314	0.206299	0.0499	8.61723	8.67506	168.103	169.587	190.338	11.6816	168.198	5.35748	0.0425195	0.836633	168.198	5.35748	3.18521
UK038	UK038_21	131.4	2.194	0.0265	4.15094	4.96629	0.230191	21.0483	21.2477	0.197211	0.063	20.6349	20.6591	168.606	210.356	708.231	76.1934	168.599	8.2649	4.27266	0.0387302	168.599	8.2649	4.90209
UK038	UK038_107	257.2	1.432	0.02654	3.24039	4.23484	0.19614	16.0031	16.2645	0.202485	0.0536	15.6716	15.7035	168.857	181.855	354.281	52.3381	169.049	7.04671	0.945769	0.330799	169.049	7.04671	4.16844
UK038	UK038_46	384	1.578	0.02661	2.21721	3.51422	0.176478	10.8323	11.2148	0.204686	0.0481	10.6029	10.65	169.296	165.026	104.191	-62.4874	169.085	5.81265	0.256798	0.612328	169.085	5.81265	3.43771
UK038	UK038_72	247.5	1.769	0.02664	3.19069	4.19693	0.18182	15.6816	15.9482	0.203468	0.0495	15.3535	15.3861	169.485	169.625	171.582	1.22239	169.488	6.99812	0.00013143	0.990853	169.488	6.99812	4.12898
UK038	UK038_91	185.2	1.748	0.02664	3.52853	4.45917	0.210837	15.7318	15.9976	0.224292	0.0574	15.331	15.3636	169.485	194.255	506.935	66.5667	169.71	7.45457	3.14897	0.0759749	169.71	7.45457	4.39254
UK038	UK038_90	294	1.621	0.02689	2.38007	3.61917	0.173515	15.1454	15.4214	0.157147	0.0468	14.9573	14.9907	171.054	162.465	39.0335	-338.225	170.803	6.07276	0.562407	0.453292	170.803	6.07276	3.55541
UK038	UK038_123	363.2	2.78	0.02692	3.04606	4.08805	0.179277	14.4044	14.6943	0.211467	0.0483	14.0787	14.1141	171.243	167.438	113.989	-50.227	171.129	6.87658	0.117181	0.732112	171.129	6.87658	4.01835
UK038	UK038_67	47.9	2.73	0.0271	7.01107	7.52255	0.175618	45.2276	45.3207	0.155018	0.047	44.6809	44.692	172.373	164.283	49.2271	-250.158	172.322	12.7881	0.057154	0.811052	172.322	12.7881	7.42106
UK038	UK038_110	115.5	1.723	0.0273	4.0293	4.86508	0.184442	22.8077	22.9919	0.176664	0.049	22.449	22.4712	173.628	171.876	147.831	-17.4502	173.606	8.32236	0.009578	0.922038	173.606	8.32236	4.79383
UK038	UK038_70	59.9	2.098	0.0274	5.47445	6.11583	0.204007	37.4394	37.5519	0.146222	0.054	37.037	37.0505	174.255	188.511	371.05	53.0372	174.289	10.5132	0.196205	0.657801	174.289	10.5132	6.03209
UK038	UK038_141	731	2.67	0.02743	2.04156	3.40612	0.186077	10.1664	10.5731	0.200814	0.0492	9.95935	10.0094	174.443	173.276	157.373	-10.8472	174.382	5.79669	0.0195975	0.888667	174.382	5.79669	3.32413
UK038	UK038_83	539	2.37	0.02742	2.99052	4.04684	0.205668	12.3171	12.6548	0.242794	0.0544	11.9485	11.9903	174.381	189.911	387.646	55.0154	174.744	6.9438	2.09063	0.148205	174.744	6.9438	3.97371
UK038	UK038_39	201	1.881	0.02774	3.28046	4.26557	0.211128	18.0542	18.2862	0.181701	0.0552	17.7536	17.7818	176.388	194.499	420.333	58.0361	176.573	7.41447	1.26975	0.259813	176.573	7.41447	4.19909
UK038	UK038_38	272	2.17	0.02799	3.39407	4.35355	0.176368	16.1164	16.3759	0.210598	0.0457	15.7549	15.7866	177.956	164.931	-18.1852	1078.57	177.541	7.60245	1.1455	0.284494	177.541	7.60245	4.28208
UK038	UK038_136	557	1.58	0.02799	2.07217	3.42455	0.190262	10.1529	10.56	0.204097	0.0493	9.93915	9.98933	177.956	176.852	162.123	-9.76604	177.898	5.9443	0.0169439	0.896433	177.898	5.9443	3.34141
UK038	UK038_78	64.1	2.15	0.0281	6.40569	6.9618	0.20147	31.4289	31.5628	0.203815	0.052	30.7692	30.7855	178.646	186.37	285.41	37.4073	178.687	12.2628	0.0855047	0.769972	178.687	12.2628	6.86273
UK038	UK038_66	244.9	2.94	0.0287	2.96167	4.02557	0.191526	16.9956	17.2419	0.174261	0.0484	16.7355	16.7654	182.407	177.931	118.867	-53.4548	182.307	7.21383	0.104071	0.746998	182.307	7.21383	3.95696
UK038	UK038_56	354	1.79	0.02891	2.52508	3.71614	0.196914	12.4055	12.7408	0.203546	0.0494	12.1457	12.1868	183.723	182.512	166.86	-10.1062	183.678	6.68662	0.0133524	0.908007	183.678	6.68662	3.6404
UK038	UK038_4	277.6	3.485	0.02925	2.63248	3.78994	0.189551	13.8691	14.1699	0.189808	0.047	13.617	13.6537	185.853	176.246	49.2271	-277.542	185.506	6.89569	0.725422	0.394371	185.506	6.89569	3.71723
UK038	UK038_13	255	2.884	0.0292	3.21918	4.21862	0.20211	13.5358	13.8438	0.237827	0.0502	13.1474	13.1854	185.539	186.91	204.264	9.16696	185.581	7.68397	0.0141247	0.905396	185.581	7.68397	4.1405
UK038	UK038_127	566	1.988	0.02922	2.49829	3.69799	0.214335	16.3573	16.6131	0.152732	0.0532	16.1654	16.1963	185.665	197.184	337.336	44.9615	185.856	6.74982	0.602928	0.437463	185.856	6.74982	3.63175
UK038	UK038_9	250	2.411	0.03064	2.70888	3.8434	0.236158	13.8629	14.1639	0.195404	0.0559	13.5957	13.6324	194.553	215.269	448.399	56.6117	194.936	7.34798	2.30588	0.128885	194.936	7.34798	3.76944
UK038	UK038_44	240	2.39	0.031	2.87097	3.95931	0.184221	15.8081	16.0727	0.181613	0.0431	15.5452	15.5774	196.804	171.687	-161.833	221.609	195.803	7.61134	4.08109	0.0433656	195.803	7.61134	3.88723
UK038	UK038_122	422	2.104	0.03152	1.93528	3.3435	0.235552	11.6017	11.9596	0.16681	0.0542	11.4391	11.4827	200.054	214.772	379.369	47.2665	200.534	6.54226	1.61734	0.203463	200.534	6.54226	3.26242
UK038	UK038_24	369	2.89	0.03292	2.18712	3.49531	0.221504	11.8833	12.233	0.184049	0.0488	11.6803	11.7231	208.798	203.16	138.233	-51.0476	208.548	7.11323	0.255839	0.612993	208.548	7.11323	3.41084
UK038	UK038_43	186	2.187	0.033	4.54545	5.30046	0.227502	22.4647	22.6516	0.202338	0.05	22	22.0227	209.297	208.134	194.993	-7.33555	209.28	10.899	0.003096	0.955627	209.28	10.899	5.20785
UK038	UK038_3	250	3.154	0.03306	2.63158	3.78931	0.237488	12.0004	12.3467	0.219292	0.0521	11.7083	11.7509	209.671	216.361	289.801	27.6499	209.904	7.77334	0.319184	0.572099	209.904	7.77334	3.70328
UK038	UK038_143	273	3.88	0.0334	3.29341	4.27554	0.209536	18.3204	18.5492	0.179767	0.0455	18.022	18.0497	211.793	193.163	-28.8048	835.27	211.277	8.86481	1.35893	0.243723	211.277	8.86481	4.19582
UK038	UK038_28	304	2.08	0.03331	2.852	3.94558	0.24158	12.8676	13.1912	0.221642	0.0526	12.5475	12.5873	211.231	219.714	311.581	32.2067	211.482	8.16389	0.43817	0.508007	211.482	8.16389	3.86033
UK038	UK038_102	133.1	2.734	0.0337	3.26409	4.253	0.260207	18.153	18.3838	0.17981	0.056	17.8571	17.8851	213.664	234.834	452.368	52.7677	213.901	8.92751	1.21856	0.269644	213.901	8.92751	4.17366
UK038	UK038_144	126.4	1.684	0.0341	3.51906	4.45168	0.211577	22.4991	22.6858	0.156409	0.045	22.2222	22.2447	216.158	194.875	-55.6551	488.388	215.727	9.42992	1.16379	0.28068	215.727	9.42992	4.37124
UK038	UK038_16	258.7	2.783	0.0341	2.93255	4.00419	0.243548	13.2626	13.5769	0.221114	0.0518	12.9344	12.973	216.158	221.322	276.591	21.8494	216.315	8.47356	0.151713	0.696904	216.315	8.47356	3.91724
UK038	UK038_105	383	3.06	0.03421	2.66004	3.80913	0.280654	12.8827	13.2059	0.206482	0.0595	12.605	12.6446	216.844	251.176	585.44	62.9606	217.434	8.10607	5.49295	0.0190934	217.434	8.10607	3.72805
UK038	UK038_109	161.2	2.504	0.0343	3.79009	4.66888	0.291324	16.0387	16.2995	0.236309	0.0616	15.5844	15.6165	217.404	259.601	660.251	67.0724	217.641	9.97859	5.18927	0.0227267	217.641	9.97859	4.58489
UK038	UK038_98	757	2.774	0.03433	1.51471	3.11898	0.239984	6.29922	6.93642	0.24046	0.0507	6.1144	6.19563	217.591	218.408	227.214	4.23495	217.69	6.46437	0.0142732	0.904903	217.69	6.46437	2.96952
UK038	UK038_73	178.6	2.26	0.0347	2.88184	3.96721	0.244963	15.8885	16.1518	0.181379	0.0512	15.625	15.657	219.897	222.476	249.844	11.9864	219.956	8.54565	0.0261692	0.871488	219.956	8.54565	3.88516
UK038	UK038_101	183.7	2.895	0.03515	2.61735	3.77945	0.228754	17.7785	18.0141	0.14722	0.0472	17.5847	17.6132	222.7	209.17	59.358	-275.181	222.369	8.23246	0.647711	0.420932	222.369	8.23246	3.70217
UK038	UK038_96	229	1.69	0.03567	2.69134	3.83106	0.269024	11.8276	12.1789	0.227546	0.0547	11.5174	11.5607	225.938	241.913	399.981	43.513	226.432	8.46752	1.52855	0.21633	226.432	8.46752	3.73954
UK038	UK038_146	108	3.53	0.0358	4.7486	5.47567	0.241869	22.9457	23.1288	0.206949	0.049	22.449	22.4712	226.747	219.95	147.831	-53.3824	226.63	12.1762	0.0925343	0.76098	226.63	12.1762	5.37273
UK038	UK038_150	98.7	1.616	0.0361	4.43213	5.2036	0.308603	21.4311	21.6269	0.206809	0.062	20.9677	20.9916	228.613	273.098	674.109	66.0866	228.708	11.687	2.95138	0.0858045	228.708	11.687	5.11
UK038	UK038_77	84.8	2.44	0.0363	6.33609	6.8978	0.325328	23.931	24.1065	0.264765	0.065	23.0769	23.0986	229.858	285.993	774.336	70.3155	229.56	15.5733	3.55213	0.0594689	229.56	15.5733	6.78397
UK038	UK038_10	372	2.73	0.0363	2.75482	3.87592	0.25826	13.084	13.4024	0.210549	0.0516	12.7907	12.8297	229.858	233.264	267.725	14.1439	229.97	8.70493	0.0613725	0.80434	229.97	8.70493	3.78525
UK038	UK038_64	152	1.847	0.0369	3.25203	4.24375	0.219792	17.8906	18.1248	0.181773	0.0432	17.5926	17.621	233.589	201.736	-156.073	249.666	232.419	9.66451	3.87983	0.0488694	232.419	9.66451	4.15823
UK038	UK038_95	632	2.817	0.03771	1.77672	3.25429	0.245934	9.0555	9.50977	0.196203	0.0473	8.87949	8.93562	238.623	223.268	64.4002	-270.531	237.334	7.45685	2.62123	0.105443	237.334	7.45685	3.14193
UK038	UK038_85	466.9	1.663	0.0675	1.92593	3.3381	0.490474	5.83014	6.51339	0.33034	0.0527	5.50285	5.59297	421.076	405.233	315.902	-33.2932	417.998	12.9614	2.18986	0.138922	417.998	12.9614	3.10082
UK038	UK038_55	271	1.91	0.0685	2.0438	3.40746	0.507185	10.079	10.4891	0.202777	0.0537	9.86965	9.92018	427.112	416.554	358.489	-19.1422	426.301	13.8153	0.351973	0.552999	426.301	13.8153	3.24075
UK038	UK038_34	1271	1.436	0.07531	1.24817	2.9986	0.574221	4.86449	5.66542	0.256589	0.0553	4.70163	4.8068	468.068	460.741	424.372	-10.2964	466.357	12.5473	0.451308	0.501714	466.357	12.5473	2.69049
UK038	UK038_106	214.3	1.76	0.0958	4.5929	5.3412	0.924623	24.7162	24.8862	0.185826	0.07	24.2857	24.3063	589.748	664.802	928.353	36.4737	590.576	30.0669	1.46844	0.225592	590.576	30.0669	5.09111
UK038	UK038_8	347	1.286	0.098	1.63265	3.17793	0.748578	6.70016	7.30245	0.243674	0.0554	6.49819	6.57469	602.677	567.399	428.402	-40.6804	595.88	17.2208	4.80876	0.0283155	595.88	17.2208	2.88997
UK038	UK038_145	362.7	0.363	0.0983	1.83113	3.28431	0.819993	6.54247	7.15804	0.279884	0.0605	6.28099	6.3601	604.439	608.045	621.505	2.74591	605.051	18.101	0.0478635	0.826824	605.051	18.101	2.99165
UK038	UK038_81	181	1.207	0.1023	2.05279	3.41286	0.805403	7.80542	8.32816	0.262995	0.0571	7.53065	7.59675	627.874	599.872	495.398	-26.7414	623.466	19.5595	2.22936	0.13541	623.466	19.5595	3.13723
UK038	UK038_133	95.8	1.691	0.1017	2.94985	4.01688	0.919869	14.6297	14.9152	0.201634	0.0656	14.3293	14.3641	624.364	662.291	793.638	21.3289	625.827	23.7321	1.08229	0.298186	625.827	23.7321	3.79212
UK038	UK038_116	673	0.6873	0.1229	1.2205	2.98719	1.10315	4.32332	5.20815	0.282307	0.0651	4.14747	4.26632	747.234	754.872	777.57	3.90142	749.626	18.8938	0.263241	0.607902	749.626	18.8938	2.52043
UK038	UK038_17	571	2.84	0.1651	2.30164	3.56808	1.69819	4.40286	5.27436	0.522759	0.0746	3.75335	3.88428	985.057	1007.85	1057.74	6.87197	995.362	29.0428	1.96816	0.160643	995.362	29.0428	2.91781
UK038	UK038_65	188.7	1.305	0.1781	1.96519	3.3609	1.71158	5.66054	6.36203	0.347173	0.0697	5.30846	5.40183	1056.59	1012.88	919.528	-14.9053	1041.07	29.2176	4.30144	0.0380802	1041.07	29.2176	2.80649
UK038	UK038_68	81.2	1.853	0.179	2.40223	3.63379	1.80168	9.22247	9.6689	0.260476	0.073	8.90411	8.96009	1061.51	1046.07	1013.95	-4.69021	1058.86	33.8735	0.236197	0.626966	1058.86	33.8735	3.19904
UK038	UK038_100	239	2.928	0.1785	1.62465	3.17383	1.86802	4.76509	5.5803	0.340948	0.0759	4.47958	4.58984	1058.77	1069.83	1092.43	3.08113	1062.81	27.4338	0.315604	0.574262	1062.81	27.4338	2.58124
UK038	UK038_151	526	3.568	0.2002	1.24875	2.99884	2.14756	3.93112	4.88747	0.317658	0.0778	3.72751	3.85931	1176.39	1164.27	1141.77	-3.03247	1170.71	26.7306	0.395411	0.529469	1170.71	26.7306	2.28328
UK038	UK038_20	211	1.792	0.2152	1.67286	3.19877	2.35	5.20064	5.95654	0.321665	0.0792	4.92424	5.02476	1256.46	1227.56	1177.14	-6.73874	1244.84	31.5552	1.57891	0.208918	1244.84	31.5552	2.53487
UK038	UK038_82	86.1	2.244	0.2128	1.73872	3.2337	2.54092	6.36229	6.99374	0.273286	0.0866	6.12009	6.20125	1243.72	1283.84	1351.61	7.98244	1254.54	33.4273	2.16383	0.141292	1254.54	33.4273	2.66451
UK038	UK038_11	287	2.846	0.245	1.38776	3.05934	3.14835	3.30933	4.40288	0.419347	0.0932	3.00429	3.16635	1412.64	1444.6	1491.95	5.31626	1431.92	30.5294	2.62274	0.105342	1431.92	30.5294	2.13206
UK038	UK038_142	456	1.613	0.2531	1.26432	3.00536	3.18962	3.61967	4.64066	0.349292	0.0914	3.39168	3.53603	1454.44	1454.65	1454.95	0.0348553	1454.56	30.6864	9.2444e-05	0.992329	1454.56	30.6864	2.10967
UK038	UK038_139	228	1.535	0.2642	1.62755	3.17531	3.34044	4.86073	5.66219	0.334837	0.0917	4.58015	4.68805	1511.29	1490.56	1461.18	-3.42965	1501.29	35.3766	0.685812	0.407592	1501.29	35.3766	2.35641
UK038	UK038_108	210	0.741	0.2866	1.43057	3.07899	3.88841	4.30942	5.19661	0.331963	0.0984	4.06504	4.18623	1624.52	1611.28	1594.02	-1.91302	1617.32	35.0243	0.282726	0.59492	1617.32	35.0243	2.16557
UK038	UK038_51	1610	4.609	0.2886	1.1088	2.94332	3.99115	1.86172	3.44959	0.595579	0.1003	1.49551	1.79904	1634.53	1632.4	1629.65	-0.299215	1632.53	27.9187	0.0154907	0.90095	1632.53	27.9187	1.71014
UK038	UK038_89	327	1.45	0.2911	1.20234	2.97982	4.04178	3.39761	4.46961	0.353877	0.1007	3.17776	3.33139	1647.02	1642.65	1637.05	-0.609396	1644.25	32.2544	0.0367965	0.84788	1644.25	32.2544	1.96165
UK038	UK038_33	240	1.022	0.2968	1.51617	3.11969	4.2928	4.0151	4.95527	0.377618	0.1049	3.71783	3.84997	1675.42	1691.98	1712.56	2.16876	1685.2	35.8816	0.462916	0.496265	1685.2	35.8816	2.12922
UK038	UK038_113	241	1.703	0.2989	1.57243	3.14742	4.45093	3.27285	4.37553	0.480447	0.108	2.87037	3.03958	1685.85	1721.87	1765.95	4.53562	1711.82	34.5758	2.77853	0.095536	1711.82	34.5758	2.01982
UK038	UK038_135	98.2	1.079	0.3122	1.85778	3.29925	4.39501	6.63183	7.23981	0.280131	0.1021	6.36631	6.44437	1751.52	1711.4	1662.65	-5.34562	1735.51	43.272	1.46712	0.2258	1735.51	43.272	2.49333
UK038	UK038_47	126.2	29.6	0.3202	1.96752	3.36226	4.54737	4.79152	5.60289	0.410625	0.103	4.36893	4.48192	1790.71	1739.68	1678.87	-6.66122	1759.2	40.9275	3.57746	0.0585688	1759.2	40.9275	2.32649
UK038	UK038_12	87.6	1.393	0.3274	1.86316	3.30228	5.10555	5.12519	5.89078	0.363531	0.1131	4.77454	4.87813	1825.77	1837.03	1849.81	1.29992	1831.78	42.3735	0.151193	0.697398	1831.78	42.3735	2.31324
UK038	UK038_155	98.4	1.035	0.3248	2.18596	3.49458	5.28892	6.79636	7.39082	0.321637	0.1181	6.43522	6.51246	1813.13	1867.08	1927.67	5.94215	1833.7	48.2029	2.38548	0.122467	1833.7	48.2029	2.62872
UK038	UK038_75	216.2	3.022	0.335	1.76119	3.24584	5.02545	4.92151	5.71445	0.357857	0.1088	4.59559	4.70313	1862.57	1823.62	1779.42	-4.67288	1840.14	41.106	1.85957	0.172674	1840.14	41.106	2.23386
UK038	UK038_153	203	2.614	0.3344	1.85407	3.29716	5.16399	3.8664	4.83557	0.479533	0.112	3.39286	3.53716	1859.67	1846.7	1832.12	-1.50382	1850.08	38.9397	0.277125	0.598592	1850.08	38.9397	2.10475
UK038	UK038_115	130	0.848	0.3374	1.74867	3.23906	5.2894	4.56947	5.41422	0.382685	0.1137	4.22164	4.33846	1874.15	1867.15	1859.38	-0.794562	1869.9	40.6969	0.0642577	0.799889	1869.9	40.6969	2.17642
UK038	UK038_48	91.1	1.005	0.3554	2.36353	3.60832	6.04691	4.90236	5.69796	0.482122	0.1234	4.29498	4.40985	1960.33	1982.63	2005.96	2.2745	1975.61	46.614	0.608607	0.435313	1975.61	46.614	2.35948
UK038	UK038_7	59.8	1.477	0.366	3.00546	4.05789	5.87907	6.48904	7.10924	0.46316	0.1165	5.75107	5.83737	2010.55	1958.15	1903.2	-5.64051	1977.23	55.2725	2.33985	0.126102	1977.23	55.2725	2.79546
UK038	UK038_79	366	1.487	0.3793	1.16003	2.963	6.7412	2.12826	3.60044	0.54506	0.1289	1.78433	2.04544	2073.01	2078.04	2083.02	0.480576	2077.77	31.7583	0.0518583	0.819861	2077.77	31.7583	1.52848
UK038	UK038_134	81	0.99	0.3785	1.63804	3.1807	6.92007	4.67071	5.49993	0.350705	0.1326	4.37406	4.48691	2069.27	2101.23	2132.68	2.97315	2088.42	43.0122	1.12409	0.289039	2088.42	43.0122	2.05956
UK038	UK038_37	186.6	1.786	0.389	1.25964	3.0034	6.80632	3.10396	4.25068	0.405817	0.1269	2.83688	3.00797	2118.19	2086.55	2055.46	-3.05157	2093.25	35.7334	1.48106	0.223609	2093.25	35.7334	1.70708
UK038	UK038_149	232	0.945	0.5263	1.17804	2.97009	13.2071	2.73882	3.99185	0.430124	0.182	2.47253	2.66709	2725.84	2694.56	2671.18	-2.04643	2697.47	37.1497	1.07183	0.300533	2697.47	37.1497	1.3772
UK038	UK038_126	99.6	1.723	0.521	1.91939	3.33433	13.5338	3.23241	4.34536	0.593794	0.1884	2.60085	2.78647	2703.42	2717.65	2728.24	0.909912	2718.08	41.0308	0.230867	0.630881	2718.08	41.0308	1.50955
UK038	UK038_152	132.8	0.891	0.575	1.91304	3.33068	16.7996	3.4172	4.48452	0.559828	0.2119	2.83152	3.00292	2928.32	2923.47	2920.13	-0.280293	2923.42	42.9744	0.0222692	0.881373	2923.42	42.9744	1.47
UK038	UK038_14	229.1	2	0.0303	3.23432	4.23019	0.296621	14.1767	14.4711	0.228144	0.071	13.8028	13.839	192.426	263.758	957.413	79.9015	192.326	8.01967	17.7198	2.5595e-05
UK038	UK038_18	990	3.33	0.1974	1.31712	3.02795	2.32982	2.581	3.88526	0.510315	0.0856	2.21963	2.43449	1161.34	1221.42	1329.17	12.6265	1199.18	25.8993	16.1488	5.8556e-05
UK038	UK038_29	813	1.712	0.02626	2.28484	3.55727	0.20964	8.76588	9.23441	0.260652	0.0579	8.46287	8.52174	167.098	193.251	525.98	68.231	168.006	5.84076	10.7371	0.00105007
UK038	UK038_32	907	1.236	0.03575	2.01399	3.38966	0.275543	5.9	6.57599	0.341354	0.0559	5.54562	5.63506	226.435	247.116	448.399	49.5013	228.45	7.41686	8.82595	0.00296976
UK038	UK038_58	583	1.627	0.02548	2.47253	3.68064	0.145797	12.5354	12.8674	0.197243	0.0415	12.2892	12.3298	162.197	138.194	-256.793	163.163	160.755	5.81453	8.63682	0.00329435
UK038	UK038_60	25.8	8.47	0.2146	4.24045	5.04134	3.49151	11.8049	12.1568	0.359212	0.118	11.0169	11.0622	1253.28	1525.3	1926.16	34.9337	1270.27	56.9091	28.0693	1.17049e-07
UK038	UK038_71	1265	0.741	0.02539	1.61481	3.1688	0.246805	8.66248	9.13632	0.186414	0.0705	8.51064	8.56919	161.631	223.977	942.951	82.859	162.882	5.04325	44.6911	2.30704e-11
UK038	UK038_80	275	2.611	0.3111	1.6072	3.16493	4.95431	3.58403	4.61291	0.448434	0.1155	3.20346	3.35592	1746.12	1811.56	1887.7	7.50014	1789.96	36.644	7.87799	0.005004
UK038	UK038_86	650	1.473	0.02593	1.85114	3.29551	0.205576	8.72048	9.19132	0.212275	0.0575	8.52174	8.58021	165.025	189.833	510.762	67.6904	166.026	5.33034	9.793	0.00175177
UK038	UK038_92	72.6	2.48	0.495	2.22222	3.51738	13.1314	3.87172	4.83982	0.573963	0.1924	3.17048	3.32444	2592.27	2689.14	2762.79	6.17182	2685.11	45.776	10.0516	0.00152216
UK038	UK038_94	1043	3.023	0.236	0.932203	2.88144	3.69976	1.91349	3.47781	0.487173	0.1137	1.67106	1.94742	1365.87	1571.32	1859.38	26.5415	1500.83	27.4281	157.163	4.71588e-36
UK038	UK038_103	152.2	1.684	0.02805	3.27986	4.26511	0.2978	15.9258	16.1884	0.205946	0.077	15.5844	15.6165	178.332	264.681	1121.19	84.0944	177.931	7.50016	20.108	7.31906e-06
UK038	UK038_124	1313	19.8	0.3126	0.959693	2.89045	5.07733	2.09972	3.58365	0.457057	0.1178	1.86757	2.11845	1753.49	1832.33	1923.12	8.82043	1816.51	29.7637	15.051	0.000104646
UK038	UK038_125	431	3.188	0.02527	2.8888	3.97226	0.234489	12.0887	12.4327	0.238967	0.0673	11.7385	11.781	160.877	213.897	847.072	81.0079	161.034	6.31081	19.6878	9.11839e-06
UK038	UK038_131	474	2.801	0.01824	2.79605	3.90533	0.148632	12.9947	13.3153	0.215168	0.0591	12.6904	12.7297	116.523	140.704	570.782	79.5853	116.759	4.5064	7.81314	0.00518678
UK038	UK038_132	590	1.069	0.01852	2.80778	3.91373	0.157298	13.7635	14.0665	0.204002	0.0616	13.474	13.5111	118.296	148.335	660.251	82.0832	118.481	4.58587	9.69645	0.00184624
UK038	UK038_137	1570	1.023	0.02411	1.90792	3.32774	0.18483	6.57775	7.1903	0.290057	0.0556	6.29496	6.3739	153.579	172.209	436.431	64.8102	154.852	4.99174	11.2139	0.000811848
Sample: Cadotte Member		Lat 54.017326		Long -119.073163		Datum NAD83		Beam Diameter: 22 µm
Sample Details		U (ppm)1	U/Th	Final 206Pb/238U (2σ)			Final 207Pb/235U (2σ)			Error Correlation	Final 207Pb/206Pb (2σ)			Apparent Age (Ma)				Concordia Age (Internal + External Errors)				Accepted Ages2
Sample	Spot			206/238	Int. (%)3	I+E (%)4	207/235	Int. (%)3	I+E (%)4		207/206	Int. (%)3	I+E (%)4	206Pb/ 238U	207Pb/ 235U	207Pb/ 206Pb	Disc (%)5	Age (Ma)	± Ma	MSWD	Prob. Fit	Age (Ma)	2σ (Ma)	2σ (%)
UK041	UK041_24	1510	0.775	0.01723	3.13407	3.77811	0.123297	15.5409	15.7153	0.201666	0.0519	15.2216	15.2544	110.126	118.057	281.007	60.8103	110.188	4.12309	0.847437	0.357279	110.188	4.12389	3.7426
UK041	UK041_91	133	2.452	0.0271	4.05904	4.57466	0.242876	21.9176	22.0416	0.185195	0.065	21.5385	21.5617	172.373	220.772	774.336	77.7393	172.237	7.78016	4.83635	0.0278659	172.237	7.78121	4.51773
UK041	UK041_97	342	0.947	0.04556	1.88762	2.83105	0.364345	9.16207	9.45491	0.206025	0.058	8.96552	9.02111	287.205	315.454	529.762	45.7861	288.062	7.9135	4.88604	0.0270747	288.062	7.91622	2.74809
UK041	UK041_48	1159	1.384	0.05127	1.48235	2.57858	0.394456	6.09693	6.52872	0.24313	0.0558	5.91398	5.99793	322.314	337.619	444.419	27.4753	323.548	7.9645	2.69399	0.100728	323.549	7.96772	2.4626
UK041	UK041_38	518	6.13	0.05182	1.81397	2.78249	0.400117	7.19665	7.56594	0.252058	0.056	6.96429	7.03571	325.686	341.733	452.368	28.0043	326.653	8.73887	2.19748	0.138236	326.654	8.74193	2.67621
UK041	UK041_43	402	7.58	0.0599	2.17028	3.02686	0.458375	8.56772	8.88018	0.253309	0.0555	8.28829	8.3484	375.017	383.127	432.421	13.275	375.455	10.9241	0.340816	0.559358	375.456	10.9273	2.91042
UK041	UK041_27	239	2.205	0.0605	3.47107	4.06203	0.504675	13.9911	14.1846	0.248091	0.0605	13.5537	13.5906	378.666	414.862	621.505	39.0728	379.255	14.9169	2.30326	0.129102	379.256	14.9194	3.93386
UK041	UK041_8	381	1.634	0.061	1.63934	2.67193	0.469316	7.70334	8.04942	0.21281	0.0558	7.52688	7.59302	381.704	390.716	444.419	14.1117	382.271	9.76638	0.481442	0.48777	382.271	9.77006	2.55579
UK041	UK041_70	890	7.63	0.06221	1.38241	2.52246	0.470048	5.6463	6.11003	0.244835	0.0548	5.47445	5.56504	389.052	391.222	404.072	3.71729	389.297	9.25658	0.0480163	0.826552	389.297	9.26043	2.37876
UK041	UK041_117	874	2.223	0.0647	1.5456	2.61545	0.515624	5.08488	5.59533	0.303959	0.0578	4.84429	4.94643	404.145	422.224	522.189	22.6055	406.311	9.98488	3.6005	0.0577622	406.312	9.98881	2.45841
UK041	UK041_113	169.9	2.736	0.0691	2.4602	3.24104	0.536399	10.0741	10.3412	0.24421	0.0563	9.76909	9.82014	430.731	436.047	464.219	7.21375	430.981	13.3973	0.0875922	0.767261	430.981	13.4008	3.10937
UK041	UK041_150	154.1	1.18	0.0695	2.73381	3.45333	0.542379	12.3212	12.5405	0.221878	0.0566	12.0141	12.0557	433.143	439.992	475.982	9.00022	433.37	14.3918	0.096769	0.755742	433.37	14.3951	3.32165
UK041	UK041_54	387	1.541	0.0703	2.13371	3.00074	0.521481	6.84655	7.23374	0.311648	0.0538	6.50558	6.58198	437.963	426.141	362.687	-20.755	436.699	12.4398	0.947066	0.330467	436.698	12.4435	2.84945
UK041	UK041_16	1115	1.83	0.07028	1.20945	2.43197	0.538775	4.83013	5.36488	0.250397	0.0556	4.67626	4.78199	437.842	437.617	436.431	-0.323485	437.808	9.86331	0.00054776	0.981328	437.808	9.86771	2.25389
UK041	UK041_131	164	2.001	0.0713	2.52454	3.29015	0.583952	13.2065	13.4113	0.191159	0.0594	12.963	13.0015	443.983	466.998	581.788	23.6865	444.536	14.0636	0.846841	0.357448	444.536	14.0672	3.16446
UK041	UK041_83	582	10.42	0.0727	2.06327	2.95107	0.58339	5.71212	6.1709	0.36121	0.0582	5.32646	5.41952	452.402	466.637	537.299	15.8007	454.06	12.6295	1.65617	0.198122	454.061	12.6334	2.78232
UK041	UK041_26	427	2.67	0.0734	2.0436	2.93735	0.581923	7.08379	7.45867	0.288489	0.0575	6.78261	6.85593	456.607	465.696	510.762	10.6027	457.373	12.7417	0.445832	0.504321	457.374	12.7456	2.7867
UK041	UK041_85	500	1.449	0.0735	1.90476	2.84251	0.588796	6.64709	7.04525	0.286556	0.0581	6.36833	6.44637	457.208	470.098	533.535	14.306	458.363	12.3253	0.982321	0.321627	458.363	12.3294	2.68988
UK041	UK041_94	505	2.6	0.0752	1.99468	2.90353	0.581677	5.87484	6.32182	0.339529	0.0561	5.52585	5.6156	467.408	465.539	456.328	-2.42805	467.168	12.7596	0.0269846	0.869519	467.167	12.7636	2.73214
UK041	UK041_60	628	2.72	0.0772	1.42487	2.54598	0.610985	5.92307	6.36667	0.240563	0.0574	5.74913	5.83545	479.388	484.181	506.935	5.43394	479.933	11.4253	0.152401	0.696252	479.933	11.4299	2.38157
UK041	UK041_42	136.9	2.425	0.0783	2.68199	3.41245	0.590541	10.9372	11.1837	0.245217	0.0547	10.6033	10.6503	485.968	471.213	399.981	-21.4976	485.152	15.8142	0.518156	0.471629	485.151	15.8179	3.2604
UK041	UK041_90	410	1.598	0.0911	2.19539	3.04491	0.788823	6.28746	6.707	0.34917	0.0628	5.89172	5.97598	562.039	590.504	701.465	19.8763	565.112	16.0778	3.83472	0.0502014	565.113	16.0825	2.84589
UK041	UK041_44	497	1.274	0.0953	1.25918	2.45709	0.762118	5.65911	6.12186	0.222505	0.058	5.51724	5.60713	586.806	575.231	529.762	-10.7679	585.108	13.1934	0.722602	0.395292	585.107	13.1991	2.25584
UK041	UK041_66	555	7.1	0.0951	1.36698	2.51404	0.816902	5.16028	5.66394	0.264905	0.0623	4.97592	5.07541	585.629	606.318	684.423	14.4346	588.628	13.5474	2.50374	0.113576	588.629	13.553	2.30247
UK041	UK041_75	43.1	0.779	0.0957	4.07524	4.58904	0.823375	16.3804	16.546	0.248787	0.0624	15.8654	15.8969	589.16	609.93	687.846	14.3471	589.79	25.7365	0.310733	0.577231	589.79	25.7398	4.36423
UK041	UK041_49	338	1.076	0.0965	1.65803	2.68343	0.80897	7.10409	7.47796	0.233391	0.0608	6.90789	6.9799	593.865	601.876	632.166	6.05871	594.63	14.8737	0.223053	0.636723	594.63	14.8791	2.50225
UK041	UK041_20	493	3.476	0.0971	1.23584	2.44521	0.797934	4.85782	5.38982	0.254402	0.0596	4.69799	4.80324	597.391	595.662	589.083	-1.41031	597.084	13.2421	0.0195579	0.888779	597.084	13.2479	2.21876
UK041	UK041_121	474	1.974	0.0976	1.43443	2.55134	0.823574	5.42195	5.90332	0.264559	0.0612	5.22876	5.32352	600.329	610.04	646.271	7.1088	601.74	14.0758	0.50819	0.475923	601.74	14.0815	2.34012
UK041	UK041_107	333.6	1.215	0.1003	1.69492	2.70638	0.785508	7.0723	7.44776	0.239656	0.0568	6.8662	6.93864	616.167	588.62	483.777	-27.366	612.844	15.4085	2.8024	0.0941236	612.842	15.414	2.51517
UK041	UK041_100	132	4.91	0.0995	3.41709	4.01599	0.886251	10.3336	10.5941	0.330676	0.0646	9.75232	9.80346	611.478	644.353	761.336	19.6835	613.447	23.2376	1.81122	0.178362	613.448	23.2415	3.78866
UK041	UK041_6	232.2	1.783	0.1004	4.28287	4.77438	0.93995	13.7895	13.9858	0.31059	0.0679	13.1075	13.1456	616.753	672.856	865.503	28.7406	618.619	27.9835	2.76814	0.0961581	618.62	27.9869	4.52408
UK041	UK041_124	124	2.068	0.101	2.57426	3.32844	0.853656	11.0702	11.3137	0.23254	0.0613	10.7667	10.8131	620.267	626.654	649.777	4.54167	620.604	19.4889	0.0600581	0.806404	620.604	19.4936	3.14107
UK041	UK041_50	201	0.758	0.1032	2.03488	2.93129	0.903555	7.07079	7.44633	0.287787	0.0635	6.77165	6.84509	633.135	653.626	725.019	12.6733	635.181	17.3133	1.33769	0.247442	635.183	17.3186	2.72656
UK041	UK041_93	118.3	1.929	0.1092	2.83883	3.53704	1.04944	13.6415	13.8399	0.208102	0.0697	13.3429	13.3803	668.1	728.604	919.528	27.3432	669.738	22.3553	2.7643	0.0963889	669.74	22.3602	3.33865
UK041	UK041_69	19.15	2.65	0.1156	5.88235	6.2493	1.21136	23.129	23.2465	0.254329	0.076	22.3684	22.3908	705.189	805.815	1095.07	35.6034	706.455	41.7035	2.34403	0.125764	706.456	41.7065	5.90362
UK041	UK041_39	173.8	2.8	0.1244	2.49196	3.26521	1.20752	7.12606	7.49883	0.349697	0.0704	6.67614	6.75061	755.839	804.051	940.042	19.5952	761.203	22.8235	5.60649	0.017894	761.205	22.8293	2.99909
UK041	UK041_36	158.3	2.575	0.1321	2.11961	2.99073	1.28408	7.53818	7.8915	0.281183	0.0705	7.23404	7.30283	799.834	838.671	942.951	15.1775	803.813	22.0048	2.97777	0.0844153	803.816	22.0113	2.73835
UK041	UK041_109	191	1.651	0.1503	2.06254	2.95056	1.45064	7.02394	7.40185	0.293645	0.07	6.71429	6.78835	902.645	910.136	928.353	2.76924	903.754	23.9684	0.114645	0.734916	903.755	23.9755	2.65287
UK041	UK041_123	429	3.436	0.1518	1.58103	2.63655	1.46302	4.57379	5.1353	0.345671	0.0699	4.29185	4.40681	911.046	915.254	925.417	1.55297	912.162	20.7952	0.0720385	0.788391	912.162	20.8031	2.28064
UK041	UK041_14	183	3.059	0.156	1.66667	2.68878	1.53361	6.52771	6.93273	0.255322	0.0713	6.31136	6.39009	934.509	943.947	966.027	3.26257	935.974	22.4044	0.190913	0.662158	935.974	22.4123	2.39454
UK041	UK041_115	619	35.8	0.1652	1.15012	2.40302	1.65594	3.36626	4.09676	0.341662	0.0727	3.16369	3.31797	985.61	991.826	1005.6	1.98807	987.93	19.3687	0.2014	0.653593	987.93	19.3782	1.96149
UK041	UK041_143	531	0.2937	0.164	1.46341	2.56775	1.72532	3.95075	4.58914	0.370414	0.0763	3.66972	3.80354	978.968	1018.01	1102.95	11.2412	990.772	21.3989	6.62289	0.0100676	990.773	21.4078	2.16072
UK041	UK041_86	188	1.127	0.1702	2.35018	3.15833	1.81871	6.26404	6.68505	0.375185	0.0775	5.80645	5.89193	1013.21	1052.22	1134.09	10.6581	1020.93	28.3166	3.26137	0.07093	1020.93	28.324	2.77433
UK041	UK041_46	108	2.606	0.172	2.5	3.27135	1.82845	8.17381	8.50075	0.305855	0.0771	7.7821	7.84609	1023.12	1055.72	1123.78	8.95694	1027.44	30.0402	1.37716	0.240585	1027.44	30.0475	2.9245
UK041	UK041_62	158	2.3	0.1732	1.96305	2.88189	1.803	6.27521	6.69552	0.312826	0.0755	5.96026	6.04357	1029.72	1046.55	1081.84	4.81815	1032.93	26.0948	0.585449	0.444184	1032.93	26.1028	2.52706
UK041	UK041_148	54.1	0.388	0.1754	2.67959	3.41056	1.95166	11.3494	11.5871	0.2361	0.0807	11.0285	11.0737	1041.8	1099.02	1214.15	14.1954	1045.75	32.3321	2.1076	0.146569	1045.76	32.3395	3.09245
UK041	UK041_30	107	1.854	0.1766	2.37826	3.17928	1.77996	8.15216	8.47994	0.291733	0.0731	7.79754	7.8614	1048.37	1038.16	1016.73	-3.11265	1046.8	29.6027	0.140174	0.708108	1046.8	29.6102	2.82863
UK041	UK041_151	247	1.204	0.1759	1.81922	2.78591	1.93055	5.34429	5.83208	0.340404	0.0796	5.02513	5.12366	1044.54	1091.73	1187.09	12.009	1054.91	25.3694	5.66578	0.017299	1054.91	25.3779	2.4057
UK041	UK041_55	761	3.75	0.1789	1.9005	2.83966	1.88947	4.94868	5.47185	0.384043	0.0766	4.56919	4.67734	1060.96	1077.4	1110.8	4.48621	1065.64	25.7555	0.814052	0.366925	1065.64	25.7639	2.4177
UK041	UK041_71	205	2.102	0.1883	1.80563	2.77705	2.10039	5.14782	5.65259	0.350756	0.0809	4.82077	4.92339	1112.16	1148.93	1219.02	8.76583	1121.55	26.4556	3.43939	0.063659	1121.56	26.4645	2.35962
UK041	UK041_29	47.1	3.19	0.1906	3.14795	3.78964	1.97888	11.3356	11.5736	0.277704	0.0753	10.8898	10.9356	1124.62	1108.34	1076.52	-4.46849	1122.68	38.0404	0.181219	0.670328	1122.68	38.0472	3.38896
UK041	UK041_63	811	15.77	0.1883	1.80563	2.77705	2.0952	4.58375	5.14418	0.393919	0.0807	4.21314	4.33019	1112.16	1147.23	1214.15	8.40004	1122.95	26.0898	3.83039	0.0503311	1122.95	26.0988	2.32413
UK041	UK041_140	409.5	1.091	0.19	1.31579	2.48657	2.09578	3.85641	4.50818	0.341195	0.08	3.625	3.7604	1121.38	1147.42	1196.99	6.31692	1130.42	22.8608	2.50074	0.113793	1130.42	22.8708	2.02322
UK041	UK041_102	188.2	1.843	0.1933	1.75892	2.74692	2.20147	5.15216	5.65654	0.341396	0.0826	4.84262	4.94479	1139.23	1181.51	1259.78	9.56939	1149.95	26.7282	4.34681	0.0370784	1149.95	26.7373	2.32508
UK041	UK041_15	95.5	2.113	0.2007	2.1425	3.007	2.02563	7.81316	8.15458	0.274217	0.0732	7.51366	7.57991	1179.08	1124.15	1019.49	-15.6533	1168.37	30.6259	3.9858	0.0458854	1168.36	30.6344	2.622
UK041	UK041_135	208.4	3.99	0.2004	2.09581	2.97391	2.27128	5.29831	5.78998	0.395561	0.0822	4.86618	4.96787	1177.47	1203.41	1250.29	5.82404	1185.1	29.6111	1.60533	0.20515	1185.11	29.6199	2.49935
UK041	UK041_74	212	1.745	0.2015	1.48883	2.58232	2.28653	5.43277	5.91327	0.274047	0.0823	5.22479	5.31962	1183.37	1208.13	1252.67	5.53155	1189.2	25.9286	1.28297	0.257348	1189.2	25.9384	2.18116
UK041	UK041_141	603	0.949	0.2025	1.33333	2.4959	2.2532	3.14653	3.91821	0.423748	0.0807	2.85006	3.02041	1188.74	1197.79	1214.15	2.09299	1193.09	23.0947	0.379811	0.537704	1193.09	23.106	1.93665
UK041	UK041_95	358	27	0.2032	2.3622	3.16729	2.26099	4.83017	5.36491	0.489052	0.0807	4.21314	4.33019	1192.49	1200.21	1214.15	1.78401	1195.63	31.0618	0.177523	0.67351	1195.63	31.0706	2.59867
UK041	UK041_72	474	1.024	0.2052	1.46199	2.56693	2.30588	4.76948	5.31033	0.30653	0.0815	4.53988	4.64871	1203.19	1214.1	1233.53	2.45908	1206.43	25.5961	0.303405	0.581756	1206.43	25.606	2.12246
UK041	UK041_1	274	2.174	0.2097	1.66905	2.69025	2.28705	5.20531	5.705	0.320644	0.0791	4.93047	5.03086	1227.22	1208.3	1174.64	-4.47635	1221.51	27.3364	0.825169	0.363673	1221.51	27.3459	2.2387
UK041	UK041_77	177.9	2.365	0.2128	1.50376	2.59095	2.27392	6.12301	6.55309	0.245591	0.0775	5.93548	6.01913	1243.72	1204.23	1134.09	-9.66708	1234.29	27.0453	2.73859	0.097951	1234.29	27.0552	2.19196
UK041	UK041_23	133.1	2.03	0.2136	2.15356	3.01489	2.45917	6.13866	6.56771	0.350819	0.0835	5.7485	5.83483	1247.97	1260.12	1280.93	2.57316	1251.11	31.8677	0.257412	0.611904	1251.11	31.8765	2.54785
UK041	UK041_120	120.4	1.853	0.2256	1.81738	2.78471	2.66265	7.12809	7.50076	0.25496	0.0856	6.89252	6.96469	1311.4	1318.16	1329.17	1.33678	1312.69	31.1813	0.0564398	0.812214	1312.69	31.1913	2.37613
UK041	UK041_28	140	1.269	0.2267	1.94089	2.86684	2.63187	6.1346	6.56392	0.316384	0.0842	5.81948	5.90477	1317.18	1309.59	1297.18	-1.54201	1315.17	31.5407	0.0942685	0.758819	1315.16	31.5503	2.39896
UK041	UK041_56	124	1.714	0.2282	1.84049	2.79985	2.61153	6.76134	7.15315	0.272208	0.083	6.50602	6.58243	1325.06	1303.89	1269.22	-4.39977	1320.24	31.2458	0.620878	0.430721	1320.23	31.2556	2.36743
UK041	UK041_73	208	1.513	0.233	1.37339	2.51753	2.75641	4.30424	4.89676	0.319078	0.0858	4.07925	4.20004	1350.2	1343.82	1333.68	-1.23884	1347.8	26.8356	0.104743	0.74621	1347.8	26.8465	1.99188
UK041	UK041_68	65.6	2.019	0.2369	2.40608	3.20015	2.86135	8.67373	8.9825	0.277398	0.0876	8.33333	8.39312	1370.56	1371.8	1373.73	0.23045	1370.78	37.6396	0.00131772	0.971043	1370.78	37.6488	2.74653
UK041	UK041_111	323.3	2.592	0.2395	1.37787	2.51997	2.90926	3.77889	4.44204	0.364623	0.0881	3.51873	3.65807	1384.1	1384.32	1384.67	0.04106	1384.2	26.7658	0.00014894	0.990263	1384.2	26.7773	1.9345
UK041	UK041_145	567	1.77	0.2414	1.40845	2.53682	2.94898	2.85471	3.68797	0.493378	0.0886	2.48307	2.67687	1393.97	1394.59	1395.53	0.111458	1394.36	25.5636	0.00165139	0.967585	1394.36	25.5775	1.83436
UK041	UK041_17	276	2.158	0.2503	1.51818	2.59935	3.18195	4.3922	4.97425	0.345653	0.0922	4.12148	4.24106	1440.02	1452.79	1471.51	2.1397	1445.03	29.3195	0.379259	0.538	1445.03	29.3307	2.02977
UK041	UK041_37	190	0.639	0.2496	1.48237	2.5786	3.27629	4.75384	5.29629	0.311826	0.0952	4.51681	4.62618	1436.41	1475.44	1532.03	6.24148	1449.36	29.6759	3.07945	0.0792871	1449.36	29.6872	2.04829
UK041	UK041_59	200	1.858	0.2596	2.42681	3.21577	3.2429	4.84574	5.37894	0.500813	0.0906	4.19426	4.31182	1487.8	1467.48	1438.21	-3.4478	1476.97	36.4221	0.929892	0.334891	1476.97	36.4322	2.46669
UK041	UK041_51	343.6	1.509	0.2599	1.3082	2.48256	3.24665	3.15387	3.92411	0.414791	0.0906	2.86976	3.039	1489.33	1468.38	1438.21	-3.55454	1477.26	26.4867	1.48785	0.22255	1477.26	26.5	1.79386
UK041	UK041_108	530	2.095	0.2567	0.895988	2.29228	3.30224	2.52248	3.43724	0.355202	0.0933	2.35798	2.56127	1472.94	1481.58	1493.98	1.40884	1478.03	23.3197	0.283328	0.594528	1478.03	23.3344	1.57875
UK041	UK041_21	251	0.986	0.2621	1.41167	2.53861	3.33557	4.14793	4.75995	0.340332	0.0923	3.90033	4.02648	1500.58	1489.42	1473.57	-1.83306	1495.71	28.9468	0.297894	0.585206	1495.71	28.9585	1.93611
UK041	UK041_147	218.3	1.163	0.2667	1.5748	2.63282	3.27644	4.0246	4.65287	0.391294	0.0891	3.7037	3.83633	1524.03	1475.47	1406.31	-8.3708	1499.34	29.7005	6.04884	0.0139154	1499.34	29.7122	1.98169
UK041	UK041_101	162.9	2.578	0.2686	1.74981	2.74109	3.37015	4.22549	4.82768	0.414109	0.091	3.84615	3.97403	1533.69	1497.48	1446.6	-6.02026	1515.37	31.3886	3.1881	0.0741764	1515.37	31.4	2.07211
UK041	UK041_7	245	1.438	0.2634	1.25285	2.45385	3.5446	3.99264	4.62525	0.313789	0.0976	3.79098	3.92066	1507.21	1537.23	1578.76	4.532	1519.6	28.2297	2.13642	0.143837	1519.6	28.2419	1.85851
UK041	UK041_92	232	1.574	0.269	1.33829	2.49855	3.39371	4.36331	4.94876	0.306714	0.0915	4.15301	4.2717	1535.72	1502.94	1457.03	-5.40099	1521.94	29.0611	2.33553	0.126452	1521.94	29.0728	1.91025
UK041	UK041_67	279.4	0.828	0.2766	1.87997	2.82596	3.56587	4.09358	4.71266	0.459248	0.0935	3.63636	3.77136	1574.22	1541.97	1498.03	-5.08542	1556.04	32.5493	2.6123	0.106038	1556.04	32.5611	2.09256
UK041	UK041_47	97.4	0.783	0.2711	2.43453	3.22159	3.7454	6.00469	6.44267	0.405438	0.1002	5.48902	5.57937	1546.38	1581.13	1627.8	5.00159	1558.78	39.9674	1.71876	0.189853	1558.78	39.9771	2.56464
UK041	UK041_31	299	0.811	0.2756	1.70537	2.71294	3.76577	3.56281	4.25974	0.478658	0.0991	3.12815	3.2841	1569.16	1585.48	1607.25	2.36948	1578.77	30.8525	0.781773	0.376599	1578.77	30.8656	1.95504
UK041	UK041_35	149	0.845	0.2867	1.91838	2.85165	3.89372	5.2371	5.73402	0.366306	0.0985	4.8731	4.97464	1625.02	1612.38	1595.92	-1.8233	1619.85	35.7004	0.263505	0.607722	1619.85	35.7113	2.20461
UK041	UK041_5	63.5	1.342	0.289	2.31834	3.13471	3.89707	7.81596	8.15726	0.296616	0.0978	7.46421	7.5309	1636.53	1613.07	1582.59	-3.40818	1630.41	41.7779	0.481732	0.487639	1630.41	41.7881	2.56304
UK041	UK041_3	217.3	1.142	0.2886	1.55925	2.62355	3.9832	3.64685	4.33027	0.427561	0.1001	3.2967	3.44503	1634.53	1630.78	1625.94	-0.528136	1632.4	30.7268	0.0367765	0.847921	1632.4	30.7398	1.8831
UK041	UK041_139	418	8.59	0.2867	1.11615	2.38695	4.02813	2.43043	3.37027	0.45924	0.1019	2.15898	2.37933	1625.02	1639.89	1659.01	2.04927	1635.35	25.6676	0.831777	0.361759	1635.35	25.6844	1.57058
UK041	UK041_52	119.1	1.288	0.2936	1.90736	2.84425	3.99958	5.12522	5.63202	0.372151	0.0988	4.75709	4.86106	1659.49	1634.11	1601.59	-3.61515	1648.44	35.8285	1.0784	0.299056	1648.44	35.8395	2.17415
UK041	UK041_134	171	1.902	0.2938	1.59973	2.6478	4.09953	4.44784	5.02345	0.359664	0.1012	4.1502	4.26897	1660.49	1654.21	1646.24	-0.865658	1657.61	32.7881	0.0774859	0.780734	1657.61	32.8001	1.97876
UK041	UK041_32	267	1.884	0.2896	1.38122	2.5218	4.20463	3.25188	4.0033	0.424744	0.1053	2.94397	3.10917	1639.53	1674.92	1719.56	4.65405	1660	29.294	3.58316	0.0583681	1660	29.3081	1.76555
UK041	UK041_136	153.1	1.457	0.2988	1.63989	2.67226	4.08278	4.54435	5.10909	0.360864	0.0991	4.23814	4.35452	1685.36	1650.87	1607.25	-4.8597	1669	33.2542	2.26832	0.132043	1669	33.2661	1.99317
UK041	UK041_79	140.9	1.457	0.2959	1.55458	2.62077	4.23898	4.78325	5.32271	0.325005	0.1039	4.52358	4.63279	1670.95	1681.6	1694.93	1.41481	1675.25	33.3085	0.196554	0.657517	1675.25	33.3205	1.98899
UK041	UK041_13	278	1.996	0.3004	1.53129	2.60703	4.17919	3.3444	4.07882	0.457867	0.1009	2.97324	3.1369	1693.29	1669.95	1640.73	-3.20348	1678.26	30.3047	1.52014	0.217598	1678.26	30.3188	1.80656
UK041	UK041_144	173.2	0.841	0.3006	1.59681	2.64604	4.17369	4.65205	5.20512	0.343248	0.1007	4.36941	4.48239	1694.28	1668.87	1637.05	-3.49627	1682.84	33.3488	1.17282	0.278823	1682.84	33.3607	1.98241
UK041	UK041_138	124.7	1.648	0.2955	2.03046	2.92822	4.38808	4.89755	5.42566	0.414586	0.1077	4.45682	4.56763	1668.96	1710.1	1760.86	5.21956	1687.33	37.2576	2.95726	0.085493	1687.33	37.269	2.20876
UK041	UK041_96	76.7	1.416	0.2951	1.93155	2.86053	4.47979	5.5257	5.99876	0.349557	0.1101	5.17711	5.27281	1666.96	1727.23	1801.06	7.44514	1687.83	37.6027	5.10249	0.0238915	1687.83	37.6141	2.22854
UK041	UK041_142	129	1.694	0.3017	1.85615	2.81016	4.44271	4.94926	5.47238	0.375036	0.1068	4.58801	4.69573	1699.73	1720.34	1745.51	2.62249	1708.59	36.2514	0.706021	0.400768	1708.59	36.263	2.12239
UK041	UK041_118	934	5.431	0.3043	1.84029	2.79971	4.44743	2.70399	3.57257	0.680583	0.106	1.98113	2.21921	1712.6	1721.22	1731.73	1.10462	1720.95	29.6083	0.312665	0.576049	1720.95	29.6272	1.72156
UK041	UK041_40	246	1.414	0.304	1.08553	2.37278	4.5646	2.79093	3.63882	0.388949	0.1089	2.57117	2.75879	1711.11	1742.83	1781.1	3.92919	1730.81	27.2742	2.97431	0.084596	1730.8	27.29	1.57672
UK041	UK041_41	227	1.027	0.3047	1.34559	2.50247	4.58771	3.64569	4.32929	0.36909	0.1092	3.38828	3.53277	1714.57	1747.04	1786.11	4.00525	1731.52	30.6951	2.43958	0.118308	1731.52	30.7087	1.77351
UK041	UK041_10	341	3.514	0.3041	1.28247	2.4691	4.55352	2.63516	3.52077	0.486678	0.1086	2.30203	2.50985	1711.61	1740.81	1776.06	3.62916	1732.38	27.8322	2.89517	0.0888453	1732.37	27.8492	1.60757
UK041	UK041_149	449	1.261	0.3125	1.6	2.64797	4.61467	3.38929	4.11571	0.472075	0.1071	2.98786	3.15076	1753	1751.92	1750.65	-0.134359	1752.29	31.6255	0.00304096	0.956023	1752.29	31.6399	1.80563
UK041	UK041_34	248	2.111	0.3136	2.04082	2.93542	4.72604	3.56882	4.26477	0.571846	0.1093	2.92772	3.09379	1758.4	1771.87	1787.78	1.64345	1768.57	34.6003	0.493409	0.482411	1768.57	34.6149	1.95723
UK041	UK041_84	262	2.099	0.3139	1.40172	2.53309	4.83876	3.34864	4.08229	0.418594	0.1118	3.04114	3.20134	1759.87	1791.66	1828.88	3.77343	1778.85	30.8155	2.55082	0.110237	1778.85	30.83	1.73314
UK041	UK041_116	88.3	1.948	0.319	2.63323	3.37426	4.75464	5.56525	6.03521	0.473156	0.1081	4.90287	5.00381	1784.84	1776.93	1767.64	-0.973305	1780.57	44.191	0.0893178	0.765046	1780.57	44.2014	2.48243
UK041	UK041_11	493	1.678	0.3225	1.33333	2.4959	5.06916	2.64185	3.52578	0.504697	0.114	2.2807	2.4903	1801.93	1830.96	1864.13	3.33704	1823.71	28.7855	2.70094	0.100289	1823.71	28.8031	1.57937
UK041	UK041_99	364	2.838	0.3296	1.21359	2.43404	5.12168	2.52855	3.4417	0.479956	0.1127	2.21828	2.43326	1836.44	1839.71	1843.4	0.37765	1838.91	27.9428	0.0334286	0.854928	1838.91	27.9607	1.5205
UK041	UK041_78	165.3	2.327	0.3285	2.40487	3.19924	5.36729	4.00832	4.63879	0.599969	0.1185	3.20675	3.35906	1831.11	1879.65	1933.73	5.30693	1868.84	39.0259	5.40722	0.0200537	1868.84	39.04	2.089
UK041	UK041_103	180.4	0.6776	0.3413	1.75798	2.74631	5.57643	4.10822	4.72538	0.427919	0.1185	3.71308	3.84538	1892.92	1912.47	1933.73	2.11034	1904.28	36.154	0.720447	0.395997	1904.28	36.1674	1.89927
UK041	UK041_12	317	1.987	0.3435	1.31004	2.48354	5.70709	3.26216	4.01166	0.401588	0.1205	2.98755	3.15047	1903.49	1932.44	1963.64	3.06336	1921.65	31.35	1.92653	0.165138	1921.65	31.3654	1.63221
UK041	UK041_112	142.3	0.967	0.3472	1.69931	2.70913	5.74942	3.66505	4.34561	0.463653	0.1201	3.24729	3.39778	1921.21	1938.83	1957.7	1.86395	1932.81	34.7788	0.663294	0.415399	1932.81	34.7933	1.80015
UK041	UK041_81	82.1	0.854	0.3526	2.21214	3.05701	5.9701	5.28936	5.78179	0.418224	0.1228	4.80456	4.90752	1947	1971.5	1997.3	2.51838	1959.45	43.0115	0.794516	0.372738	1959.45	43.0232	2.19567
UK041	UK041_98	278	1.975	0.3583	1.39548	2.52964	5.95299	2.85405	3.68746	0.488947	0.1205	2.48963	2.68295	1974.11	1969	1963.64	-0.5333	1970.18	30.7338	0.0682351	0.793924	1970.18	30.7512	1.56083
UK041	UK041_137	284	0.729	0.3632	1.29405	2.47514	6.05443	2.94622	3.75925	0.439225	0.1209	2.64682	2.82942	1997.32	1983.71	1969.55	-1.41024	1987.45	30.6665	0.447413	0.503566	1987.45	30.6833	1.54385
UK041	UK041_127	488	1.631	0.3633	1.01844	2.34285	6.3817	2.35132	3.31367	0.433137	0.1274	2.11931	2.34339	1997.8	2029.75	2062.4	3.13258	2022.07	27.8294	2.81693	0.0932748	2022.06	27.8487	1.37724
UK041	UK041_106	34	0.512	0.371	2.96496	3.63905	6.24072	7.57186	7.92368	0.391576	0.122	6.96721	7.03861	2034.1	2010.18	1985.68	-2.43868	2023.62	54.9011	0.427776	0.513082	2023.62	54.9108	2.71349
UK041	UK041_64	101.9	1.978	0.3772	1.82927	2.79248	6.27221	4.99078	5.50995	0.36653	0.1206	4.64345	4.74991	2063.19	2014.58	1965.12	-4.99066	2037.21	39.9159	3.16187	0.0753766	2037.21	39.9284	1.95996
UK041	UK041_126	163	1.854	0.3799	1.81627	2.78398	6.51091	3.97859	4.61312	0.45651	0.1243	3.53982	3.67836	2075.82	2047.37	2018.85	-2.82181	2056.36	37.3724	1.43407	0.231101	2056.36	37.3866	1.8181
UK041	UK041_22	125.4	2.686	0.3816	1.54612	2.61577	6.55583	4.2256	4.82778	0.365894	0.1246	3.93258	4.05774	2083.75	2053.43	2023.12	-2.99701	2066.13	36.4407	1.46024	0.226892	2066.13	36.4544	1.76438
UK041	UK041_25	150.5	1.428	0.3819	1.67583	2.69447	6.75581	3.60839	4.29793	0.464426	0.1283	3.19564	3.34845	2085.15	2079.95	2074.81	-0.498503	2081.46	35.6225	0.0526335	0.818543	2081.46	35.6378	1.71215
UK041	UK041_19	22	1.013	0.382	3.66492	4.22888	7.0578	10.3707	10.6303	0.353393	0.134	9.70149	9.75289	2085.62	2118.74	2151.04	3.04131	2096.08	68.4994	0.451402	0.50167	2096.08	68.5083	3.2684
UK041	UK041_33	96.7	2.149	0.4866	1.54131	2.61292	11.8485	3.07548	3.86139	0.50116	0.1766	2.66138	2.84305	2555.95	2592.51	2621.2	2.48923	2587.49	35.7215	2.28377	0.130734	2587.49	35.7406	1.38128
UK041	UK041_122	124.3	1.494	0.541	2.21811	3.06133	14.8739	4.32349	4.91368	0.513038	0.1994	3.71113	3.8435	2787.63	2807.2	2821.29	1.19303	2804.34	46.035	0.419069	0.517402	2804.34	46.0504	1.64212
UK041	UK041_130	338	1.256	0.5592	1.28755	2.47175	15.0041	2.0885	3.13266	0.616496	0.1946	1.6444	1.92459	2863.32	2815.5	2781.43	-2.94411	2811.67	29.7098	4.41671	0.0355886	2811.68	29.7354	1.05757
UK041	UK041_132	24.1	1.96	0.587	4.08859	4.6009	17.8868	6.79706	7.18691	0.601523	0.221	5.42986	5.52118	2977.25	2983.66	2987.99	0.359572	2983.48	69.0774	0.0214359	0.883598	2983.48	69.0883	2.3157
UK041	UK041_104	232.7	3.156	0.734	2.0436	2.93735	31.859	2.73035	3.59257	0.748474	0.3148	1.81067	2.06846	3548.31	3545.95	3544.61	-0.104128	3545.35	32.1119	0.00648259	0.935828	3545.35	32.1348	0.906394
UK041	UK041_2	177	1.507	0.331	1.41994	2.54322	5.87821	3.6995	4.3747	0.383819	0.1288	3.41615	3.5595	1843.23	1958.02	2081.66	11.4539	1902.23	33.4819	26.9954	2.03945e-07
UK041	UK041_4	1505	3.221	0.06267	1.26057	2.4578	0.540059	5.58414	6.05263	0.225741	0.0625	5.44	5.53115	391.843	438.463	691.262	43.3149	395.646	9.16622	18.1577	2.03348e-05
UK041	UK041_9	262	0.961	0.494	2.02429	2.92395	13.282	4.48305	5.05465	0.451543	0.195	4	4.12311	2587.96	2699.9	2784.8	7.06836	2666.28	45.9346	14.4187	0.000146343
UK041	UK041_18	1071	1.841	0.1022	2.54403	3.30512	1.18931	7.10607	7.47984	0.358008	0.0844	6.63507	6.71001	627.289	795.64	1301.79	51.8133	631.458	19.7159	64.6941	8.74785e-16
UK041	UK041_45	105.2	1.105	0.1683	2.0202	2.92112	1.87962	7.67795	8.02513	0.263117	0.081	7.40741	7.4746	1002.74	1073.93	1221.44	17.9056	1010.47	26.4431	6.84427	0.00889261
UK041	UK041_53	196.4	1.098	0.3192	1.69173	2.70438	5.14052	3.51594	4.22061	0.48116	0.1168	3.08219	3.24036	1785.82	1842.83	1907.82	6.3947	1821.85	33.4355	8.04459	0.00456396
UK041	UK041_57	1397	1.527	0.0604	1.82119	2.7872	0.512169	7.54031	7.89354	0.241527	0.0615	7.31707	7.38509	378.058	419.907	656.767	42.4366	380.011	10.1527	9.54148	0.00200879
UK041	UK041_58	117.6	1.177	0.2804	2.71041	3.43483	4.77084	6.50708	6.91331	0.416533	0.1234	5.91572	5.99965	1593.38	1779.78	2005.96	20.5678	1640.85	45.607	37.7658	7.9768e-10
UK041	UK041_61	527	3.51	0.0606	1.9802	2.8936	0.513865	6.17952	6.60592	0.320445	0.0615	5.85366	5.93846	379.273	421.045	656.767	42.2515	381.993	10.5549	14.1384	0.000169845
UK041	UK041_65	147	2.405	0.2127	1.97461	2.88978	2.62477	5.61037	6.07684	0.351958	0.0895	5.2514	5.34576	1243.19	1307.6	1414.88	12.135	1258.96	30.5994	7.87679	0.00500732
UK041	UK041_76	701	92.3	0.3099	1.45208	2.5613	5.36676	2.46382	3.39443	0.589361	0.1256	1.99045	2.22753	1740.21	1879.57	2037.27	14.5811	1850.26	29.1147	75.9479	2.91249e-18
UK041	UK041_80	246.5	1.045	0.2314	1.51253	2.59605	3.14907	4.89988	5.42776	0.308688	0.0987	4.66059	4.76666	1341.83	1444.77	1599.7	16.12	1368.81	29.0181	20.9088	4.81667e-06
UK041	UK041_82	609	8.36	0.0742	1.88679	2.8305	0.641465	6.49997	6.90661	0.290277	0.0627	6.2201	6.29997	461.41	503.213	698.071	33.9022	464.462	12.4414	9.51564	0.00203728
UK041	UK041_87	73.4	1.528	0.483	2.07039	2.95606	15.5568	4.60166	5.16013	0.449923	0.2336	4.10959	4.22951	2540.32	2849.98	3076.88	17.4384	2722.88	49.2631	106.849	4.80385e-25
UK041	UK041_88	764	1.66	0.4921	1.56472	2.6268	12.7152	2.95609	3.76699	0.529322	0.1874	2.508	2.70002	2579.76	2658.79	2719.48	5.13782	2650.64	35.4063	11.0607	0.000881758
UK041	UK041_89	517	1.435	0.0882	1.81406	2.78254	0.784386	5.28249	5.7755	0.34341	0.0645	4.96124	5.06102	544.883	587.982	758.068	28.1222	550.031	14.21	11.6323	0.000648155
UK041	UK041_105	547	2.15	0.3031	1.25371	2.45429	4.65974	2.80677	3.65099	0.446674	0.1115	2.51121	2.70299	1706.66	1760.04	1824.01	6.43342	1741.22	28.3522	8.86421	0.00290816
UK041	UK041_110	32.4	0.454	0.556	3.05755	3.71489	13.8374	5.5683	6.03802	0.5491	0.1805	4.65374	4.75997	2850.08	2738.64	2657.47	-7.24782	2749.19	56.1698	9.39856	0.00217156
UK041	UK041_114	604	4.38	0.2919	1.81569	2.78361	4.63647	3.10384	3.88402	0.584981	0.1152	2.51736	2.70871	1651.02	1755.86	1883.01	12.3205	1726.11	31.9388	38.0491	6.89878e-10
UK041	UK041_119	1028	3.109	0.4399	1.72767	2.72701	10.6871	2.38614	3.33847	0.724041	0.1762	1.64586	1.92584	2350.19	2496.31	2617.42	10.2097	2521.04	29.5993	61.1563	5.27195e-15
UK041	UK041_125	154	2.278	0.0901	3.44062	4.03604	0.843521	9.62011	9.89941	0.357649	0.0679	8.9838	9.03928	556.129	621.087	865.503	35.7451	558.871	21.4132	8.52057	0.00351155
UK041	UK041_128	463	1.764	0.4573	1.13711	2.39682	10.9964	1.92089	3.0235	0.591969	0.1744	1.54817	1.84305	2427.63	2522.82	2600.32	6.64139	2523.09	28.1336	24.0933	9.17799e-07
UK041	UK041_129	234	1.487	0.0727	2.33838	3.14956	0.633509	8.09812	8.42801	0.288755	0.0632	7.75316	7.81739	452.402	498.279	714.968	36.7241	454.57	13.6685	7.87171	0.00502141
UK041	UK041_133	434	4.2	0.4545	1.89219	2.8341	10.4841	3.19163	3.95452	0.592861	0.1673	2.57023	2.75792	2415.23	2478.51	2530.81	4.56705	2474.9	36.6942	7.6167	0.00578301
UK041	UK041_146	1330	6.436	0.2315	1.2527	2.45377	3.61645	2.46096	3.39235	0.509029	0.1133	2.11827	2.34245	1342.36	1553.16	1853.01	27.558	1445.67	25.7272	216.126	6.33069e-49
Sample: Dunvegan Formation		Lat 53.885687		Long -119.099785		Datum NAD83		Beam Diameter: 22 µm
Sample Details		U (ppm)1	U/Th	Final 206Pb/238U (2σ)			Final 207Pb/235U (2σ)			Error Correlation	Final 207Pb/206Pb (2σ)			Apparent Age (Ma)				Concordia Age (Internal + External Errors)				Accepted Ages2
Sample	Spot			206/238	Int. (%)3	I+E (%)4	207/235	Int. (%)3	I+E (%)4		207/206	Int. (%)3	I+E (%)4	206Pb/ 238U	207Pb/ 235U	207Pb/ 206Pb	Disc (%)5	Age (Ma)	± Ma	MSWD	Prob. Fit	Age (Ma)	2σ (Ma)	2σ (%)
UK040	UK040_55	138.3	2.074	0.01499	5.93729	6.53339	0.117809	37.3175	37.4303	0.159102	0.057	36.8421	36.8557	95.9147	113.084	491.533	80.4866	95.8972	6.21997	0.741315	0.38924	95.8973	6.22059	6.48673
UK040	UK040_108	648	1.346	0.01767	2.54669	3.73086	0.118162	13.8445	14.1458	0.18395	0.0485	13.6082	13.6449	112.913	113.405	123.73	8.74196	112.926	4.15816	0.00429867	0.947725	112.926	4.15941	3.6833
UK040	UK040_111	240	2.96	0.03108	2.8314	3.93072	0.247262	16.5354	16.7885	0.171233	0.0577	16.2912	16.3218	197.304	224.35	518.389	61.939	197.607	7.62823	2.56387	0.109331	197.608	7.63032	3.86135
UK040	UK040_49	245	1.709	0.03187	2.9181	3.99362	0.19818	17.5394	17.7781	0.166375	0.0451	17.2949	17.3238	202.241	183.585	-50.2502	502.469	201.707	7.90754	1.61773	0.203409	201.707	7.90961	3.92134
UK040	UK040_29	330	1.566	0.0422	2.60664	3.77203	0.27638	10.64	11.0292	0.244984	0.0475	10.3158	10.3641	266.455	247.782	74.4384	-257.954	265.126	9.70312	2.49495	0.114212	265.126	9.70588	3.66086
UK040	UK040_109	273	1.294	0.0578	2.07612	3.42695	0.423975	11.0982	11.4718	0.187069	0.0532	10.9023	10.948	362.232	358.89	337.336	-7.38017	362.042	11.9105	0.0376035	0.846241	362.042	11.9147	3.29097
UK040	UK040_37	262	1.418	0.0584	2.22603	3.51979	0.450923	9.72255	10.147	0.228955	0.056	9.46429	9.51697	365.888	377.925	452.368	19.1173	366.646	12.3573	0.57451	0.448472	366.647	12.3613	3.37145
UK040	UK040_133	479	2.69	0.0614	2.11726	3.45203	0.467314	8.42263	8.90923	0.251378	0.0552	8.15217	8.21328	384.134	389.332	420.333	8.61194	384.594	12.6228	0.132966	0.715376	384.594	12.6271	3.28322
UK040	UK040_5	21.4	0.704	0.0658	6.99088	7.50374	0.417335	37.6119	37.7239	0.185869	0.046	36.9565	36.97	410.802	354.144	-2.38264	17341.5	409.317	29.7357	1.09581	0.295187	409.317	29.7379	7.26525
UK040	UK040_15	330	1.076	0.0672	1.6369	3.18012	0.530915	8.02218	8.53165	0.204047	0.0573	7.8534	7.91681	419.264	432.417	503.098	16.6635	420.494	12.5908	0.751602	0.385969	420.495	12.5958	2.99546
UK040	UK040_46	450	2.094	0.0672	1.93452	3.34306	0.553152	7.78197	8.30619	0.24859	0.0597	7.53769	7.60373	419.264	447.06	592.719	29.2642	421.702	13.3065	3.41883	0.0644567	421.704	13.3113	3.15655
UK040	UK040_2	227	1.796	0.0683	2.19619	3.50099	0.515121	7.63529	8.16892	0.287637	0.0547	7.31261	7.38067	425.906	421.887	399.981	-6.48138	425.425	14.0449	0.0842179	0.771661	425.425	14.0494	3.30245
UK040	UK040_115	97.3	0.828	0.0689	3.62845	4.53865	0.491146	15.3292	15.6019	0.236701	0.0517	14.8936	14.9272	429.525	405.692	272.164	-57.8185	428.32	18.6887	0.888422	0.345905	428.319	18.6924	4.36414
UK040	UK040_77	196.6	3.598	0.0688	2.32558	3.58358	0.542607	9.72278	10.1472	0.239189	0.0572	9.44056	9.49337	428.922	440.142	499.252	14.0872	429.709	14.6539	0.390679	0.531942	429.71	14.6585	3.41126
UK040	UK040_122	85.9	3.48	0.0739	3.38295	4.34489	0.585887	17.2054	17.4488	0.196621	0.0575	16.8696	16.8992	459.609	468.237	510.762	10.015	459.858	19.1829	0.0710181	0.78986	459.858	19.1871	4.1724
UK040	UK040_92	419	1.632	0.0751	1.73103	3.22957	0.580904	6.64649	7.25324	0.260442	0.0561	6.41711	6.49456	466.809	465.042	456.328	-2.29665	466.547	13.9767	0.0169172	0.896514	466.547	13.9819	2.9969
UK040	UK040_23	95.3	1.412	0.0991	2.5227	3.71453	0.823934	13.8307	14.1323	0.182399	0.0603	13.5987	13.6354	609.132	610.241	614.357	0.850391	609.188	21.3421	0.00118055	0.972591	609.188	21.3484	3.50441
UK040	UK040_81	1192	3.37	0.101	3.06931	4.1054	0.887079	7.99128	8.5026	0.384082	0.0637	7.37834	7.44579	620.267	644.799	731.685	15.2276	623.537	23.7078	1.59817	0.206163	623.538	23.7134	3.80304
UK040	UK040_73	63.5	2.1	0.1348	3.04154	4.08469	1.23598	13.4316	13.742	0.226447	0.0665	13.0827	13.1209	815.19	817.06	822.153	0.846897	815.328	30.7662	0.00239178	0.960994	815.328	30.7737	3.77439
UK040	UK040_95	123.9	1.955	0.1559	2.30917	3.57295	1.58852	8.57131	9.04992	0.269407	0.0739	8.2544	8.31475	933.952	965.716	1038.74	10.0878	938.55	29.918	1.23268	0.266886	938.553	29.9271	3.18864
UK040	UK040_125	64.7	1.913	0.1651	2.9679	4.03015	1.64128	9.35958	9.79977	0.317097	0.0721	8.87656	8.93271	985.057	986.206	988.765	0.375006	985.251	35.3301	0.00141357	0.970009	985.251	35.3384	3.58674
UK040	UK040_47	64.5	0.644	0.17	3.41176	4.36736	1.59858	12.0756	12.4199	0.282534	0.0682	11.5836	11.6267	1012.11	969.656	874.638	-15.7177	1006	39.473	1.26079	0.261501	1006	39.4809	3.92454
UK040	UK040_118	162	2.677	0.17	2.17647	3.48865	1.72515	7.00434	7.58251	0.310732	0.0736	6.65761	6.73229	1012.11	1017.95	1030.52	1.78638	1013.46	30.588	0.0553386	0.814021	1013.46	30.5974	3.0191
UK040	UK040_4	347	1.602	0.171	1.40351	3.06652	1.75652	5.29024	6.03493	0.265301	0.0745	5.10067	5.19777	1017.62	1029.57	1055.04	3.54725	1021.19	25.9603	0.322716	0.56998	1021.2	25.9706	2.54316
UK040	UK040_138	179	1.816	0.172	2.03488	3.40212	1.73359	6.22437	6.86852	0.326922	0.0731	5.88235	5.96675	1023.12	1021.09	1016.73	-0.628978	1022.56	29.6215	0.0080445	0.928533	1022.56	29.6311	2.89775
UK040	UK040_75	43.4	1.788	0.1726	3.41831	4.37247	1.67063	13.6818	13.9866	0.249844	0.0702	13.2479	13.2856	1026.42	997.424	934.209	-9.87059	1023.24	40.3914	0.442712	0.505816	1023.24	40.3997	3.94823
UK040	UK040_87	385	2.46	0.175	1.77143	3.25141	1.73729	4.52759	5.37892	0.391252	0.072	4.16667	4.28499	1039.6	1022.46	985.941	-5.44259	1032.37	27.2194	0.888993	0.34575	1032.37	27.2296	2.6376
UK040	UK040_124	124.1	1.936	0.1734	1.96078	3.35833	1.78835	7.99808	8.509	0.245157	0.0748	7.75401	7.81823	1030.82	1041.22	1063.13	3.03962	1032.69	30.3038	0.133412	0.71492	1032.69	30.3139	2.93544
UK040	UK040_6	27.06	1.191	0.1778	4.55568	5.30923	1.83863	16.6359	16.8875	0.273846	0.075	16	16.0312	1054.94	1059.37	1068.5	1.26877	1055.35	50.6891	0.00658283	0.935335	1055.35	50.6962	4.80373
UK040	UK040_26	16.1	7.2	0.182	6.04396	6.63047	1.50565	27.343	27.4968	0.221042	0.06	26.6667	26.6854	1077.89	932.678	603.575	-78.5846	1064.05	64.2469	3.45103	0.0632123	1064.05	64.2526	6.03849
UK040	UK040_62	11.37	2.66	0.188	6.38298	6.9409	1.55529	32.3036	32.4338	0.197594	0.06	31.6667	31.6825	1110.53	952.596	603.575	-83.9924	1097.87	69.3607	2.88883	0.0891955	1097.87	69.3665	6.31829
UK040	UK040_64	312	3.246	0.1863	1.44928	3.08773	1.94965	5.33881	6.07755	0.27146	0.0759	5.13834	5.23474	1101.3	1098.33	1092.43	-0.811602	1100.33	27.7842	0.0181957	0.892698	1100.33	27.795	2.52605
UK040	UK040_35	121.4	1.417	0.1881	2.0202	3.39336	2.03073	6.81951	7.41211	0.296239	0.0783	6.51341	6.58973	1111.07	1125.86	1154.5	3.76105	1114.72	32.1303	0.320352	0.571396	1114.72	32.1407	2.8833
UK040	UK040_21	115.5	2.774	0.1931	2.48576	3.68954	2.02613	8.51795	8.9994	0.291826	0.0761	8.14717	8.20832	1138.15	1124.32	1097.7	-3.68442	1135.23	36.2339	0.200294	0.654483	1135.23	36.2438	3.19265
UK040	UK040_9	106.9	2.525	0.195	2.20513	3.50661	2.02187	7.25798	7.81742	0.303821	0.0752	6.91489	6.98683	1148.4	1122.89	1073.85	-6.94249	1141.63	33.9903	0.882532	0.347509	1141.63	34.0004	2.97824
UK040	UK040_82	53.2	0.663	0.2001	2.69865	3.8362	2.18787	9.59296	10.0229	0.281316	0.0793	9.20555	9.2597	1175.86	1177.19	1179.63	0.320072	1176.1	39.2548	0.00142573	0.96988	1176.1	39.2648	3.33858
UK040	UK040_113	183	2.113	0.2034	1.72075	3.22408	2.14543	5.38061	6.1143	0.319805	0.0765	5.09804	5.19519	1193.56	1163.58	1108.19	-7.70393	1182.26	30.7583	1.75139	0.185702	1182.25	30.7692	2.60259
UK040	UK040_20	169.1	2.682	0.199	2.01005	3.38733	2.3734	6.55839	7.1726	0.306485	0.0865	6.24277	6.32236	1169.95	1234.62	1349.38	13.2975	1185.54	33.748	5.77019	0.0163003	1185.55	33.759	2.84754
UK040	UK040_3	366	2.078	0.2231	1.5688	3.14561	2.55624	3.50004	4.54796	0.448224	0.0831	3.12876	3.28468	1298.23	1288.22	1271.57	-2.09732	1292.22	29.6009	0.293221	0.588164	1292.22	29.6143	2.29174
UK040	UK040_67	451.5	0.859	0.2273	1.6718	3.19822	2.66391	3.48587	4.53707	0.479593	0.085	3.05882	3.21814	1320.33	1318.51	1315.54	-0.364429	1319.19	30.4981	0.00986277	0.920891	1319.19	30.5118	2.31292
UK040	UK040_43	629	2.183	0.2231	1.43433	3.08075	2.74388	3.14839	4.28323	0.455576	0.0892	2.80269	2.97575	1298.23	1340.43	1408.46	7.82582	1323.56	29.0198	5.55874	0.0183887	1323.56	29.0342	2.19365
UK040	UK040_60	201.7	2.584	0.2418	1.94376	3.34841	2.74383	5.00971	5.79059	0.387997	0.0823	4.61725	4.7243	1396.05	1340.42	1252.67	-11.4462	1368.15	35.0476	5.64929	0.0174625	1368.14	35.0594	2.56255
UK040	UK040_131	501	4.33	0.2417	1.86181	3.30152	3.08262	3.19347	4.31647	0.583006	0.0925	2.59459	2.78063	1395.53	1428.38	1477.67	5.55893	1419.99	32.1523	3.56188	0.0591208	1419.99	32.1681	2.26538
UK040	UK040_99	132.7	1.402	0.2637	1.97194	3.36485	3.37411	5.03577	5.81315	0.391586	0.0928	4.63362	4.7403	1508.74	1498.4	1483.81	-1.68045	1503.58	37.7865	0.170899	0.679314	1503.58	37.7991	2.51394
UK040	UK040_16	199	2.696	0.2707	1.47765	3.10115	3.65403	4.34479	5.22598	0.340097	0.0979	4.0858	4.2064	1544.35	1561.39	1584.5	2.53388	1553.05	34.5964	0.493865	0.482208	1553.05	34.6102	2.22853
UK040	UK040_85	112.6	0.741	0.2798	1.57255	3.14748	3.77301	5.05647	5.83109	0.310998	0.0978	4.80573	4.90867	1590.35	1587.02	1582.59	-0.490493	1588.81	36.8269	0.0155282	0.900831	1588.81	36.8403	2.31873
UK040	UK040_94	187	1.564	0.2861	1.32821	3.03279	3.7554	4.30657	5.19425	0.308414	0.0952	4.09664	4.21692	1622.01	1583.27	1532.03	-5.873	1600.95	34.1316	2.40853	0.120675	1600.95	34.1456	2.13283
UK040	UK040_71	270	1.166	0.2954	1.3541	3.04422	4.05668	3.39425	4.46706	0.398938	0.0996	3.11245	3.26915	1668.46	1645.64	1616.62	-3.20629	1653.09	33.0251	1.02787	0.310659	1653.09	33.0408	1.99873
UK040	UK040_137	259.3	2.15	0.2947	1.18765	2.97392	4.07145	3.50101	4.54871	0.33923	0.1002	3.29341	3.44188	1664.97	1648.6	1627.8	-2.28374	1654.73	32.4871	0.492055	0.483012	1654.73	32.5024	1.96422
UK040	UK040_28	158	1.311	0.2937	1.53218	3.1275	4.16292	4.45467	5.31768	0.343949	0.1028	4.18288	4.30075	1659.99	1666.75	1675.28	0.912625	1663.62	36.6092	0.0697339	0.791725	1663.62	36.6233	2.20143
UK040	UK040_63	168	1.185	0.2967	1.71891	3.22309	4.16044	3.9351	4.89067	0.436815	0.1017	3.53982	3.67836	1674.92	1666.27	1655.38	-1.18087	1669.28	36.4425	0.136318	0.711969	1669.28	36.4573	2.18402
UK040	UK040_69	131.5	1.404	0.2917	1.64553	3.18456	4.3035	4.2562	5.15256	0.386619	0.107	3.92523	4.05061	1650.02	1694.03	1748.94	5.6558	1674.48	37.1624	3.16957	0.0750224	1674.48	37.1768	2.2202
UK040	UK040_106	359	1.689	0.2953	1.42228	3.07515	4.23446	3.38974	4.46363	0.419584	0.104	3.07692	3.23534	1667.96	1680.73	1696.7	1.69378	1676.53	33.7431	0.326435	0.567766	1676.53	33.7591	2.01363
UK040	UK040_78	207	4.38	0.2958	1.58891	3.15568	4.23755	3.72455	4.72292	0.426605	0.1039	3.36862	3.51392	1670.45	1681.33	1694.93	1.44416	1677.52	35.427	0.222657	0.637023	1677.52	35.4423	2.11279
UK040	UK040_40	479	1.338	0.3015	1.29353	3.01777	4.29011	2.49354	3.82772	0.518754	0.1032	2.13178	2.35468	1698.74	1691.46	1682.45	-0.968105	1692.66	30.8127	0.13656	0.711725	1692.66	30.832	1.82151
UK040	UK040_139	101.3	1.329	0.301	2.3588	3.60522	4.32035	6.85475	7.44455	0.344112	0.1041	6.43612	6.51334	1696.27	1697.25	1698.47	0.129764	1696.66	46.7944	0.000886139	0.976252	1696.66	46.8069	2.75877
UK040	UK040_102	143.1	0.741	0.309	1.58576	3.1541	4.36274	4.85606	5.65818	0.326553	0.1024	4.58984	4.69752	1735.78	1705.31	1668.07	-4.05919	1719.63	38.3242	1.23539	0.266361	1719.63	38.3382	2.22944
UK040	UK040_130	71.2	2.407	0.3013	2.02456	3.39596	4.61961	5.09571	5.86515	0.397307	0.1112	4.67626	4.78199	1697.75	1752.82	1819.12	6.6718	1725.67	42.1065	4.00917	0.0452533	1725.67	42.1201	2.4408
UK040	UK040_100	237.9	1.51	0.3073	1.59453	3.15852	4.47433	3.84955	4.82211	0.414212	0.1056	3.50379	3.6437	1727.41	1726.22	1724.79	-0.151969	1726.64	36.2994	0.00243599	0.960636	1726.64	36.3146	2.1032
UK040	UK040_97	678	7.64	0.306	0.980392	2.89739	4.52291	2.27439	3.6887	0.431057	0.1072	2.05224	2.28291	1720.99	1735.19	1752.35	1.78962	1732.12	29.4458	0.475084	0.490657	1732.12	29.4655	1.70112
UK040	UK040_56	210	2.888	0.308	1.49351	3.10874	4.53123	4.21008	5.11454	0.354745	0.1067	3.93627	4.06131	1730.86	1736.72	1743.79	0.741808	1734.25	36.7677	0.0526264	0.818555	1734.25	36.7824	2.12094
UK040	UK040_132	126	3.36	0.3018	1.98807	3.37433	4.66473	4.55971	5.40598	0.436008	0.1121	4.10348	4.22357	1700.23	1760.94	1833.74	7.28074	1735.02	40.7536	5.63296	0.0176258	1735.02	40.7678	2.3497
UK040	UK040_140	364	2.91	0.3112	1.18895	2.97444	4.50537	2.74684	3.99735	0.432842	0.105	2.47619	2.67049	1746.61	1731.96	1714.31	-1.88381	1735.44	31.4783	0.459686	0.497771	1735.44	31.4964	1.81489
UK040	UK040_83	882	4.19	0.3103	1.38576	3.05843	4.61213	2.54411	3.86085	0.544692	0.1078	2.13358	2.3563	1742.18	1751.47	1762.56	1.15618	1750.16	31.7736	0.218444	0.640228	1750.16	31.7934	1.81659
UK040	UK040_112	436	2.332	0.3114	1.31663	3.02774	4.61131	2.92068	4.11875	0.450797	0.1074	2.60708	2.79228	1747.59	1751.32	1755.76	0.465403	1750.4	32.697	0.0293054	0.864076	1750.4	32.7148	1.86899
UK040	UK040_107	578	2.394	0.3175	1.19685	2.97761	4.64035	2.47801	3.81762	0.482989	0.106	2.16981	2.38916	1777.51	1756.56	1731.73	-2.64379	1760.16	30.9636	1.01218	0.314381	1760.16	30.983	1.76024
UK040	UK040_121	100.8	0.631	0.3082	1.91434	3.33142	4.84014	5.1129	5.88009	0.374414	0.1139	4.741	4.84532	1731.84	1791.9	1862.55	7.0176	1761.54	42.0037	4.54908	0.0329364	1761.55	42.0175	2.38526
UK040	UK040_79	328	3.67	0.3205	1.21685	2.9857	4.60907	3.12313	4.26469	0.389625	0.1043	2.87632	3.04519	1792.17	1750.91	1702.01	-5.29759	1762.37	32.7684	3.16227	0.0753585	1762.37	32.7853	1.8603
UK040	UK040_117	110.4	3.94	0.3136	2.04082	3.40567	4.70442	5.62243	6.32815	0.362977	0.1088	5.23897	5.33356	1758.4	1768.03	1779.42	1.18144	1763.09	43.591	0.104587	0.746393	1763.1	43.6044	2.47317
UK040	UK040_13	337	2.96	0.3116	1.31579	3.02737	4.72597	3.11022	4.25525	0.423054	0.11	2.81818	2.99034	1748.58	1771.86	1799.4	2.82468	1765.13	33.447	1.07197	0.300501	1765.13	33.4642	1.89585
UK040	UK040_128	162	2.157	0.3123	1.37688	3.05442	4.7452	4.05234	4.98549	0.339774	0.1102	3.81125	3.94026	1752.01	1775.26	1802.71	2.81201	1765.46	36.2215	0.82505	0.363708	1765.46	36.2367	2.05253
UK040	UK040_36	453.6	1.361	0.3097	1.29157	3.01693	4.77402	3.05886	4.21786	0.42224	0.1118	2.77281	2.94762	1739.23	1780.34	1828.88	4.90196	1768.22	33.2988	3.39032	0.0655803	1768.22	33.3162	1.88417
UK040	UK040_129	247.4	4.06	0.3107	1.57708	3.14974	4.76373	3.44032	4.50217	0.458411	0.1112	3.05755	3.21693	1744.15	1778.53	1819.12	4.1212	1768.36	35.6777	2.27592	0.131397	1768.36	35.6943	2.01849
UK040	UK040_76	85.9	1.71	0.321	2.08723	3.43369	4.61626	5.6713	6.37161	0.368033	0.1043	5.27325	5.36723	1794.61	1752.21	1702.01	-5.44098	1772.37	43.8496	2.00469	0.156813	1772.37	43.8628	2.47481
UK040	UK040_110	442	4.86	0.3159	1.01298	2.90858	4.75199	2.42184	3.7814	0.418268	0.1091	2.19982	2.41644	1769.68	1776.46	1784.44	0.827502	1774.94	30.2815	0.10021	0.751578	1774.94	30.3008	1.70715
UK040	UK040_88	290	2.62	0.3135	1.40351	3.06652	4.79369	3.454	4.51263	0.406342	0.1109	3.156	3.31064	1757.91	1783.79	1814.22	3.10372	1775.28	34.9353	1.21208	0.270921	1775.28	34.9516	1.96879
UK040	UK040_39	86.2	1.098	0.3137	2.19955	3.5031	4.94381	6.26086	6.9016	0.351318	0.1143	5.86177	5.94645	1758.89	1809.77	1868.88	5.88524	1780.24	46.4641	2.49036	0.114545	1780.25	46.4774	2.61073
UK040	UK040_11	387	1.343	0.3128	2.14194	3.46722	4.84337	3.85544	4.82681	0.555564	0.1123	3.2057	3.35805	1754.47	1792.46	1836.97	4.49091	1783.87	39.638	2.77732	0.095608	1783.87	39.654	2.22292
UK040	UK040_116	266	1.476	0.3154	1.36335	3.04834	4.84449	3.42488	4.49038	0.398071	0.1114	3.14183	3.29714	1767.23	1792.66	1822.38	3.02658	1784.28	34.7501	1.15888	0.281699	1784.28	34.7665	1.94849
UK040	UK040_18	84	1.649	0.318	3.01887	4.06783	4.91073	9.25614	9.70102	0.326148	0.112	8.75	8.80696	1779.95	1804.1	1832.12	2.84733	1787.35	57.446	0.315054	0.574596	1787.35	57.4581	3.2147
UK040	UK040_72	438	2.22	0.3195	1.25196	3.00018	4.86782	2.90776	4.10959	0.430557	0.1105	2.62443	2.8085	1787.29	1796.7	1807.65	1.1265	1794.32	32.8031	0.177775	0.673292	1794.32	32.8211	1.82916
UK040	UK040_41	233.5	0.829	0.3221	1.42813	3.07786	4.86746	3.66556	4.67654	0.389607	0.1096	3.37591	3.52091	1799.98	1796.64	1792.77	-0.401883	1797.76	35.7406	0.0185089	0.891784	1797.76	35.7565	1.98895
UK040	UK040_32	233	2.582	0.3254	1.62876	3.17594	4.90387	3.35029	4.43375	0.486157	0.1093	2.92772	3.09379	1816.05	1802.92	1787.78	-1.58118	1805.91	35.7976	0.32836	0.566626	1805.91	35.8146	1.98319
UK040	UK040_105	177	2.55	0.3221	1.42813	3.07786	4.96073	3.68957	4.69538	0.387071	0.1117	3.40197	3.5459	1799.98	1812.65	1827.26	1.49307	1808.26	35.9893	0.264794	0.606846	1808.26	36.0052	1.99115
UK040	UK040_104	550	9.76	0.3234	1.05133	2.92215	5.04317	2.60851	3.90359	0.403038	0.1131	2.38727	2.58825	1806.31	1826.6	1849.81	2.35165	1821.61	31.3695	0.829769	0.362339	1821.6	31.3884	1.72312
UK040	UK040_25	602	19.9	0.3238	1.2971	3.0193	5.05388	2.56122	3.87215	0.506437	0.1132	2.20848	2.42433	1808.26	1828.4	1851.41	2.33071	1825.05	32.1823	0.922672	0.336774	1825.05	32.2021	1.76445
UK040	UK040_45	262	2.23	0.3363	1.66518	3.19476	4.9754	3.49735	4.54589	0.476126	0.1073	3.07549	3.23398	1868.85	1815.15	1754.06	-6.544	1827.01	36.5168	5.07659	0.024251	1827.01	36.5334	1.99962
UK040	UK040_84	119.5	1.716	0.3303	1.66515	3.19475	4.99138	4.94225	5.73232	0.336922	0.1096	4.65328	4.75952	1839.84	1817.86	1792.77	-2.62519	1827.81	40.4868	0.588158	0.443132	1827.81	40.5011	2.21583
UK040	UK040_24	127.5	0.811	0.3251	1.96863	3.36291	5.13244	5.43459	6.16186	0.36224	0.1145	5.0655	5.16327	1814.59	1841.49	1872.03	3.06844	1828.1	43.7964	0.810464	0.367983	1828.1	43.8101	2.39649
UK040	UK040_114	271	1.82	0.329	1.30699	3.02356	5.0806	3.06092	4.21935	0.426992	0.112	2.76786	2.94296	1833.53	1832.87	1832.12	-0.0770613	1833.04	33.8022	0.000818935	0.97717	1833.04	33.8199	1.84501
UK040	UK040_134	867	6.96	0.3241	1.66615	3.19527	5.13899	3.09538	4.24441	0.538271	0.115	2.6087	2.7938	1809.72	1842.58	1879.88	3.73232	1836.72	35.4467	2.29586	0.129719	1836.71	35.465	1.9309
UK040	UK040_48	381	1.692	0.3354	1.63983	3.18163	5.29505	3.16531	4.29568	0.518064	0.1145	2.70742	2.8862	1864.5	1868.06	1872.03	0.402127	1867.42	35.7942	0.0248713	0.874688	1867.42	35.8123	1.91774
UK040	UK040_65	183	1.632	0.3372	1.24555	2.99751	5.38855	4.90621	5.70128	0.253873	0.1159	4.74547	4.84969	1873.19	1883.04	1893.92	1.09471	1878.07	38.701	0.109095	0.741177	1878.07	38.716	2.06148
UK040	UK040_74	107.1	1.4	0.3362	2.05235	3.4126	5.47919	5.08564	5.8564	0.403558	0.1182	4.65313	4.75937	1868.36	1897.34	1929.19	3.15298	1884.87	44.2904	1.00014	0.317276	1884.87	44.3045	2.35054
UK040	UK040_70	155	2.251	0.3455	1.64978	3.18677	5.33064	4.09993	5.02425	0.402393	0.1119	3.75335	3.88428	1913.07	1873.79	1830.5	-4.51092	1886.44	38.8988	2.2044	0.137618	1886.44	38.9142	2.06284
UK040	UK040_96	648	86	0.3423	1.28542	3.0143	5.40398	2.45882	3.80519	0.522779	0.1145	2.09607	2.32239	1897.72	1885.48	1872.03	-1.37257	1886.92	32.1677	0.32719	0.567318	1886.92	32.1884	1.70587
UK040	UK040_42	461	2.248	0.3408	1.52582	3.12439	5.44138	3.00661	4.18012	0.507489	0.1158	2.59067	2.77697	1890.52	1891.4	1892.37	0.0976854	1891.25	34.9927	0.00152013	0.968899	1891.25	35.0113	1.85123
UK040	UK040_31	315	1.239	0.3449	1.62366	3.17332	5.54489	2.9702	4.15401	0.546649	0.1166	2.48714	2.68064	1910.2	1907.58	1904.74	-0.286489	1907.92	35.2737	0.0138099	0.906451	1907.92	35.2928	1.84981
UK040	UK040_34	230	2.014	0.3458	1.67727	3.20108	5.67379	3.90768	4.86864	0.429224	0.119	3.52941	3.66834	1914.51	1927.39	1941.26	1.37804	1923.43	39.0791	0.248813	0.617912	1923.43	39.0952	2.03258
UK040	UK040_90	235	9.84	0.3449	1.47869	3.10165	5.78267	3.60654	4.63043	0.410002	0.1216	3.28947	3.43812	1910.2	1943.82	1979.83	3.51721	1933.45	37.3435	1.77163	0.183181	1933.45	37.3602	1.93231
UK040	UK040_136	29.4	1.414	0.354	2.79661	3.90573	5.69119	8.69528	9.16742	0.321624	0.1166	8.23328	8.29378	1953.67	1930.03	1904.74	-2.56877	1944.79	57.6973	0.311036	0.577045	1944.78	57.7099	2.96742
UK040	UK040_101	164	1.561	0.3489	1.37575	3.05391	5.89303	3.99919	4.94239	0.344008	0.1225	3.7551	3.88597	1929.34	1960.21	1992.95	3.19176	1948.46	38.125	1.297	0.254762	1948.46	38.141	1.95749
UK040	UK040_58	104.8	2.97	0.3551	1.99944	3.38104	5.797	4.67239	5.50136	0.427926	0.1184	4.22297	4.33976	1958.91	1945.96	1932.22	-1.38124	1950.38	43.3501	0.209317	0.647303	1950.38	43.3647	2.2234
UK040	UK040_33	229.1	1.505	0.382	1.46597	3.0956	6.85239	3.19956	4.32098	0.458178	0.1301	2.84397	3.01465	2085.62	2092.52	2099.31	0.652306	2091.17	37.0389	0.0740376	0.785546	2091.17	37.0576	1.77209
UK040	UK040_53	858	14.9	0.3839	1.12008	2.94759	6.88647	1.84049	3.43818	0.608579	0.1301	1.46042	1.76998	2094.48	2096.92	2099.31	0.230427	2096.98	30.4602	0.0136088	0.907132	2096.98	30.4853	1.45377
UK040	UK040_8	253.2	3.527	0.3889	1.46567	3.09546	6.90109	3.22696	4.34131	0.454196	0.1287	2.8749	3.04386	2117.72	2098.8	2080.29	-1.79947	2102.34	37.1411	0.540028	0.462421	2102.34	37.1597	1.76754
UK040	UK040_50	217.8	1.484	0.3991	1.47833	3.10147	7.74243	3.20432	4.32451	0.461354	0.1407	2.84293	3.01368	2164.89	2201.54	2235.84	3.17318	2194.7	37.9155	1.98122	0.159262	2194.7	37.9346	1.72847
UK040	UK040_30	709	0.898	0.4158	1.5873	3.15487	8.34159	2.44193	3.7943	0.650018	0.1455	1.85567	2.10796	2241.38	2268.85	2293.7	2.2808	2270.82	34.1805	1.45776	0.227287	2270.82	34.2041	1.50625
UK040	UK040_52	613	1.405	0.4622	1.10342	2.9413	10.4068	1.88713	3.46337	0.584707	0.1633	1.53092	1.82859	2449.26	2471.66	2490.12	1.64065	2472.53	32.0003	0.848318	0.357029	2472.52	32.0265	1.2953
UK040	UK040_27	99.5	1.379	0.472	2.11864	3.45287	11.6167	4.40807	5.27871	0.480628	0.1785	3.86555	3.9928	2492.33	2574.01	2638.98	5.55734	2558.02	48.5077	6.47736	0.0109257	2558.02	48.5246	1.89696
UK040	UK040_38	332	0.831	0.4945	1.31446	3.0268	11.4954	2.35771	3.74065	0.557515	0.1686	1.9573	2.19795	2590.12	2564.21	2543.79	-1.82103	2563.84	34.9466	0.93025	0.334798	2563.84	34.9707	1.364
UK040	UK040_89	315	1.54	0.4853	1.4218	3.07493	11.7098	2.50067	3.83237	0.568568	0.175	2.05714	2.28732	2550.31	2581.48	2606.05	2.13874	2581.8	35.8362	1.37568	0.240838	2581.8	35.8599	1.38895
UK040	UK040_93	52.2	1.383	0.49	2.44898	3.66486	11.9448	5.19492	5.95154	0.471418	0.1768	4.58145	4.68931	2570.68	2600.09	2623.08	1.99778	2593.7	53.9322	0.684681	0.40798	2593.7	53.9474	2.07994
UK040	UK040_127	187.5	1.673	0.4893	1.5328	3.12781	12.0155	2.58175	3.88576	0.593707	0.1781	2.07748	2.30563	2567.65	2605.61	2635.26	2.56559	2606.94	36.3286	2.03582	0.153631	2606.94	36.3522	1.39444
UK040	UK040_59	77.6	1.48	0.49	2.44898	3.66486	12.2556	4.66385	5.4941	0.525098	0.1814	3.96913	4.09316	2570.68	2624.18	2665.71	3.56511	2617.06	51.1696	2.56489	0.10926	2617.06	51.186	1.95586
UK040	UK040_44	413	13.8	0.495	4.0404	4.87427	12.4284	6.51208	7.13028	0.620448	0.1821	5.10708	5.20407	2592.27	2637.33	2672.09	2.98707	2635.96	67.0529	1.2268	0.26803	2635.96	67.0656	2.54426
UK040	UK040_57	106.2	0.984	0.5063	1.61959	3.17124	12.4469	3.68412	4.6911	0.439614	0.1783	3.30903	3.45683	2640.81	2638.72	2637.12	-0.140046	2639.04	43.0059	0.00436697	0.947312	2639.04	43.0247	1.63031
UK040	UK040_91	39.2	1.61	0.504	2.57937	3.75324	12.4876	5.48564	6.20693	0.470203	0.1797	4.8414	4.9436	2630.96	2641.8	2650.1	0.722238	2639.46	56.2367	0.0849277	0.770727	2639.46	56.2514	2.13117
UK040	UK040_10	95	0.654	0.4983	1.72587	3.22681	12.5937	3.84597	4.81925	0.448747	0.1833	3.43699	3.57951	2606.49	2649.75	2682.96	2.85025	2642.48	44.3936	1.86635	0.171894	2642.48	44.412	1.68069
UK040	UK040_54	97.5	1.981	0.5123	1.75678	3.24345	12.5026	3.66836	4.67873	0.478901	0.177	3.22034	3.37203	2666.44	2642.92	2624.96	-1.58027	2645.47	43.3415	0.556338	0.455739	2645.47	43.3604	1.63904
UK040	UK040_68	210	1.775	0.5178	1.42912	3.07832	12.8153	2.69437	3.96148	0.530412	0.1795	2.28412	2.49343	2689.84	2666.17	2648.26	-1.57035	2666.5	37.2913	0.677943	0.410296	2666.51	37.3141	1.39936
UK040	UK040_1	37.3	1.71	0.505	2.57426	3.74973	12.9302	5.1113	5.8787	0.50364	0.1857	4.41572	4.52754	2635.25	2674.58	2704.45	2.55872	2668.09	54.4946	1.21194	0.270948	2668.09	54.51	2.04303
UK040	UK040_80	182	1.074	0.5071	1.479	3.10179	12.9	2.71469	3.97533	0.544813	0.1845	2.27642	2.48638	2644.24	2672.38	2693.74	1.8378	2672.05	37.4672	0.999296	0.317481	2672.05	37.4901	1.40305
UK040	UK040_123	156.4	1.475	0.512	1.71875	3.22301	12.9965	3.12282	4.26447	0.550384	0.1841	2.60728	2.79247	2665.16	2679.4	2690.16	0.9291	2679.13	40.2028	0.23526	0.627651	2679.13	40.2241	1.50138
UK040	UK040_135	351	25.2	0.5136	1.28505	3.01414	13.5753	1.94544	3.49549	0.660542	0.1917	1.46062	1.77014	2671.98	2720.54	2756.8	3.0768	2727.09	32.1402	3.71689	0.0538647	2727.08	32.1671	1.17954
UK040	UK040_12	167.2	1.323	0.57	1.75439	3.24215	16.8265	2.59713	3.89599	0.67551	0.2141	1.91499	2.16037	2907.82	2925	2936.84	0.988071	2927.68	36.1427	0.356178	0.550637	2927.68	36.167	1.23535
UK040	UK040_119	157	1.253	0.5861	1.62088	3.1719	17.9886	2.55624	3.86886	0.634089	0.2226	1.97664	2.2152	2973.59	2989.13	2999.59	0.86688	2990.87	36.5476	0.274413	0.600387	2990.87	36.5721	1.22279
UK040	UK040_66	263	2.942	0.625	1.76	3.24519	22.0953	2.83544	4.05875	0.620715	0.2564	2.22309	2.43765	3129.78	3187.92	3224.72	2.94403	3193.74	38.6849	3.34015	0.0676083	3193.74	38.7084	1.21201
UK040	UK040_7	168.7	1.382	0.2723	3.23173	4.22821	4.54667	6.69462	7.29737	0.482735	0.1211	5.86292	5.94759	1552.47	1739.55	1972.49	21.2943	1618.8	53.3747	35.9249	2.05068e-09
UK040	UK040_14	342	1.694	0.2946	1.32383	3.03088	4.50876	3.00951	4.1822	0.439883	0.111	2.7027	2.88177	1664.48	1732.59	1815.85	8.33638	1711.56	32.8846	10.1582	0.00143662
UK040	UK040_17	88.6	0.826	0.433	4.15704	4.97139	10.9255	10.1773	10.5836	0.408461	0.183	9.28962	9.34329	2319.23	2516.81	2680.25	13.4697	2396.95	85.6219	13.0975	0.000295687
UK040	UK040_19	579	1.709	0.0667	1.64918	3.18645	0.591341	6.58618	7.19802	0.250399	0.0643	6.37636	6.4543	416.243	471.724	751.514	44.6127	421.451	12.5703	16.1862	5.74102e-05
UK040	UK040_22	457	10.2	0.01689	4.08526	4.91152	0.144618	15.2126	15.4873	0.268545	0.0621	14.6538	14.6879	107.971	137.149	677.554	84.0646	107.877	5.25855	9.03309	0.00265137
UK040	UK040_51	247	1.524	0.3182	1.85418	3.29722	5.30868	3.79028	4.77492	0.489194	0.121	3.30579	3.45372	1780.93	1870.26	1971.02	9.64422	1842.27	39.1351	14.177	0.000166391
UK040	UK040_61	164.7	1.554	0.4864	1.74753	3.23845	12.7155	3.16359	4.29442	0.552388	0.1896	2.63713	2.82037	2555.08	2658.81	2738.7	6.7044	2654.25	40.5309	13.4379	0.000246596
UK040	UK040_86	57.3	1.377	0.3233	2.53634	3.72381	5.54533	5.95319	6.62376	0.426048	0.1244	5.38585	5.4779	1805.83	1907.65	2020.27	10.6148	1854.77	49.8914	10.5811	0.00114247
UK040	UK040_98	159	3.86	0.2109	2.56046	3.74027	2.62582	6.20113	6.84746	0.412901	0.0903	5.64784	5.73569	1233.61	1307.9	1431.88	13.8469	1256.83	38.6566	8.37874	0.00379635
UK040	UK040_103	486	2.265	0.4332	1.20037	2.97902	9.55077	2.38749	3.7595	0.502774	0.1599	2.06379	2.2933	2320.13	2392.44	2454.6	5.47853	2386.59	34.5148	8.29025	0.00398586
UK040	UK040_120	117.1	1.651	0.2459	2.31802	3.57867	3.59051	5.9472	6.61838	0.389766	0.1059	5.47686	5.56741	1417.3	1547.43	1729.99	18.075	1459.32	41.5024	21.6707	3.23702e-06
UK040	UK040_126	32.6	1.03	0.448	2.90179	3.98171	10.6245	6.3423	6.97556	0.457529	0.172	5.63953	5.72751	2386.35	2490.85	2577.2	7.40514	2454.07	61.3017	7.50642	0.00614795
Sample: Cardium Formation		Lat 53.930445		Long -118.896731		Datum NAD83		Beam Diameter: 22 µm
Sample Details		U (ppm)1	U/Th	Final 206Pb/238U (2σ)			Final 207Pb/235U (2σ)			Error Correlation	Final 207Pb/206Pb (2σ)			Apparent Age (Ma)				Concordia Age (Internal + External Errors)				Accepted Ages2
Sample	Spot			206/238	Int. (%)3	I+E (%)4	207/235	Int. (%)3	I+E (%)4		207/206	Int. (%)3	I+E (%)4	206Pb/ 238U	207Pb/ 235U	207Pb/ 206Pb	Disc (%)5	Age (Ma)	± Ma	MSWD	Prob. Fit	Age (Ma)	2σ (Ma)	2σ (%)
UK039	UK039_88	182	1.368	0.01438	4.72879	4.83337	0.107067	24.5341	24.5748	0.192743	0.054	24.0741	24.0948	92.0392	103.278	371.05	75.1949	92.0143	4.41669	0.89106	0.34519	92.0144	4.41714	4.80049
UK039	UK039_90	182	2.421	0.01452	4.61433	4.72144	0.126127	27.3758	27.4123	0.168555	0.063	26.9841	27.0027	92.9289	120.612	708.231	86.8787	92.801	4.35382	3.15584	0.0756555	92.8011	4.35428	4.69206
UK039	UK039_91	366	4.69	0.01483	3.30411	3.45212	0.118187	16.5952	16.6554	0.1991	0.0578	16.263	16.2937	94.8984	113.427	522.189	81.8268	94.8272	3.25134	4.39277	0.0360916	94.8273	3.25199	3.42938
UK039	UK039_52	406	2.074	0.01497	3.60721	3.74326	0.0937085	18.2024	18.2573	0.198172	0.0454	17.8414	17.8694	95.7876	90.9521	-34.1402	380.572	95.7572	3.55774	0.387433	0.533652	95.7571	3.55834	3.71601
UK039	UK039_15	335	2.79	0.01511	3.44143	3.58377	0.0929182	20.6918	20.7401	0.166319	0.0446	20.4036	20.4281	96.6768	90.2181	-77.4526	224.82	96.6423	3.43756	0.538338	0.463122	96.6422	3.43819	3.55765
UK039	UK039_78	268	2.65	0.01551	4.12637	4.24581	0.0973026	20.8519	20.8998	0.197889	0.0455	20.4396	20.464	99.2164	94.2834	-28.8048	444.445	99.1875	4.17892	0.287289	0.591963	99.1875	4.17946	4.2137
UK039	UK039_85	1168	2.38	0.01575	2.22222	2.43686	0.102717	9.97582	10.0756	0.222761	0.0473	9.72516	9.77644	100.74	99.2814	64.4002	-56.4278	100.727	2.4344	0.098598	0.753519	100.727	2.43536	2.41779
UK039	UK039_40	322	1.84	0.016	3.75	3.88104	0.102583	19.0818	19.1341	0.196522	0.0465	18.7097	18.7364	102.326	99.1576	23.6239	-333.146	102.31	3.93898	0.128183	0.720324	102.31	3.9396	3.85064
UK039	UK039_84	376	0.914	0.01657	3.2589	3.40888	0.109436	15.9932	16.0556	0.203768	0.0479	15.6576	15.6895	105.942	105.449	94.3329	-12.3063	105.94	3.58123	0.00391695	0.950097	105.94	3.58196	3.38114
UK039	UK039_58	585	1.146	0.01843	2.44167	2.63851	0.120449	13.5136	13.5874	0.180683	0.0474	13.2911	13.3287	117.726	115.479	69.4269	-69.568	117.713	3.07684	0.0950015	0.757913	117.713	3.07789	2.61475
UK039	UK039_66	655	9.21	0.01872	2.45726	2.65295	0.130862	12.0867	12.1692	0.203303	0.0507	11.8343	11.8765	119.561	124.872	227.214	47.3794	119.58	3.14227	0.572531	0.449255	119.58	3.14333	2.62864
UK039	UK039_74	1239	3.764	0.01874	1.76094	2.02507	0.120925	8.93591	9.04713	0.197063	0.0468	8.76068	8.81757	119.688	115.91	39.0335	-206.629	119.644	2.39876	0.605526	0.436477	119.644	2.40014	2.00607
UK039	UK039_63	1820	2.544	0.01891	1.4807	1.78675	0.124369	6.87006	7.01411	0.215529	0.0477	6.7086	6.78272	120.763	119.025	84.4158	-43.0579	120.736	2.13412	0.203959	0.651544	120.736	2.13569	1.7689
UK039	UK039_76	556	1.338	0.01927	2.54281	2.73238	0.146664	11.8698	11.9537	0.214226	0.0552	11.5942	11.6372	123.041	138.962	420.333	70.7278	123.03	3.33005	4.34072	0.0372113	123.03	3.33111	2.70756
UK039	UK039_24	325	1.597	0.01956	3.62986	3.76508	0.150759	15.807	15.8702	0.229636	0.0559	15.3846	15.4171	124.875	142.581	448.399	72.151	124.822	4.65602	2.91888	0.0875488	124.822	4.6568	3.73075
UK039	UK039_100	195	1.633	0.0269	3.01115	3.17286	0.218829	17.2146	17.2725	0.174919	0.059	16.9492	16.9786	171.117	200.935	567.096	69.8257	171.067	5.35766	3.5929	0.058027	171.067	5.35893	3.13264
UK039	UK039_54	355	1.34	0.04855	2.03913	2.27114	0.40633	11.2247	11.3134	0.181666	0.0607	11.0379	11.0831	305.613	346.229	628.62	51.3835	305.736	6.77807	5.95093	0.0147095	305.737	6.78118	2.21798
UK039	UK039_12	268	1.522	0.0576	2.43056	2.62823	0.459835	11.6552	11.7407	0.208538	0.0579	11.399	11.4427	361.013	384.143	525.98	31.3637	361.199	9.22237	1.54935	0.213231	361.2	9.22552	2.55413
UK039	UK039_71	254	2.935	0.0681	2.64317	2.82601	0.549293	10.0957	10.1943	0.261811	0.0585	9.74359	9.79477	424.699	444.534	548.538	22.5763	425.022	11.5999	1.22708	0.267975	425.023	11.6033	2.73005
UK039	UK039_20	193	3.91	0.0684	2.92398	3.09025	0.526249	12.3581	12.4387	0.236605	0.0558	12.0072	12.0487	426.509	429.317	444.419	4.03006	426.557	12.7328	0.0175178	0.894704	426.557	12.7359	2.98575
UK039	UK039_68	256	2.466	0.0689	2.46734	2.66229	0.512046	9.41979	9.52536	0.261932	0.0539	9.09091	9.14574	429.525	419.824	366.874	-17.0771	429.248	11.0262	0.377822	0.538771	429.248	11.0298	2.56957
UK039	UK039_6	163	3.12	0.069	3.33333	3.4801	0.591753	12.6652	12.7439	0.263189	0.0622	12.2186	12.2595	430.128	471.987	680.992	36.838	430.469	14.4745	3.12077	0.0773004	430.47	14.4773	3.36315
UK039	UK039_49	253	1.516	0.0693	2.886	3.05434	0.527441	10.7218	10.8147	0.269171	0.0552	10.3261	10.3744	431.937	430.11	420.333	-2.76071	431.892	12.729	0.00998307	0.920412	431.892	12.7322	2.94801
UK039	UK039_35	452	1.6	0.0938	1.49254	1.79657	0.764349	6.10735	6.26895	0.244384	0.0591	5.92217	6.006	577.972	576.516	570.782	-1.25968	577.908	9.86125	0.0117062	0.913841	577.908	9.86835	1.7076
UK039	UK039_93	224.8	3.46	0.1059	2.83286	3.00418	0.922814	9.6045	9.70806	0.294952	0.0632	9.17722	9.23154	648.893	663.847	714.968	9.24165	649.471	18.4588	0.42747	0.513233	649.471	18.4636	2.84286
UK039	UK039_59	360.4	3.726	0.1683	1.36661	1.6934	1.70094	4.7049	4.91284	0.290465	0.0733	4.50205	4.61177	1002.74	1008.89	1022.26	1.90958	1003.4	15.3673	0.158814	0.690251	1003.4	15.3797	1.53276
UK039	UK039_50	100.3	2.86	0.1684	2.07838	2.30644	1.75536	8.71701	8.83098	0.238429	0.0756	8.46561	8.52447	1003.29	1029.14	1084.5	7.48809	1004.56	21.2425	0.832233	0.361628	1004.56	21.2517	2.11552
UK039	UK039_3	796	2.468	0.177	1.01695	1.42625	1.83524	2.72358	3.06886	0.373387	0.0752	2.5266	2.71729	1050.56	1058.16	1073.85	2.16859	1052.24	13.119	0.588972	0.442817	1052.23	13.1356	1.24836
UK039	UK039_92	245	1.67	0.1784	2.01794	2.25213	1.77104	5.39185	5.57423	0.374257	0.072	5	5.09902	1058.23	1034.9	985.941	-7.33181	1054.4	21.26	1.84853	0.173955	1054.4	21.27	2.01726
UK039	UK039_28	51.7	1.325	0.1776	3.6036	3.73978	1.89533	11.3128	11.4009	0.318542	0.0774	10.7235	10.77	1053.85	1079.45	1131.51	6.86378	1055.83	35.9005	0.483492	0.486845	1055.83	35.9065	3.40079
UK039	UK039_102	111.8	20.3	0.1807	1.88157	2.1308	1.82626	6.94461	7.08714	0.27094	0.0733	6.68486	6.75924	1070.8	1054.94	1022.26	-4.74821	1069.39	20.638	0.491361	0.483321	1069.39	20.6484	1.93087
UK039	UK039_64	55.5	2.129	0.183	3.00546	3.16746	2.14472	10.2168	10.3142	0.29417	0.085	9.76471	9.81578	1083.34	1163.35	1315.54	17.6502	1087.6	31.3353	5.00793	0.0252315	1087.6	31.3426	2.88181
UK039	UK039_1	170	0.92	0.1866	1.82208	2.07845	1.88332	6.15041	6.31091	0.296253	0.0732	5.87432	5.95883	1102.93	1075.23	1019.49	-8.184	1099.7	20.5442	1.87372	0.17105	1099.7	20.5551	1.86917
UK039	UK039_55	132.7	1.762	0.1869	1.87266	2.12293	2.00231	7.32203	7.45735	0.255757	0.0777	7.07851	7.14879	1104.56	1116.29	1139.21	3.04184	1105.42	21.2351	0.221873	0.637616	1105.42	21.2459	1.92197
UK039	UK039_82	235	0.3388	0.213	1.59624	1.88361	2.49925	4.52146	4.73747	0.353038	0.0851	4.23032	4.34691	1244.78	1271.82	1317.82	5.5423	1249.25	20.5657	2.56877	0.108993	1249.25	20.5795	1.64735
UK039	UK039_75	94	1.785	0.2148	2.04842	2.27948	2.3486	7.23186	7.36884	0.283249	0.0793	6.93569	7.00741	1254.34	1227.13	1179.63	-6.33304	1251.19	25.3141	1.13829	0.286014	1251.19	25.3252	2.02409
UK039	UK039_36	641	2.741	0.2202	0.999092	1.41357	2.56856	2.89644	3.22326	0.344937	0.0846	2.71868	2.89676	1282.93	1291.73	1306.39	1.79535	1285.06	15.4121	0.552176	0.45743	1285.06	15.4315	1.20084
UK039	UK039_61	119	1.632	0.2489	2.20972	2.42546	3.03717	5.03103	5.22601	0.439219	0.0885	4.51977	4.62908	1432.8	1417.01	1393.36	-2.83055	1428.12	29.0506	0.682551	0.40871	1428.12	29.0637	2.0351
UK039	UK039_33	170.4	1.138	0.2514	1.59109	1.87925	3.10234	4.84945	5.05145	0.328097	0.0895	4.58101	4.68888	1445.69	1433.27	1414.88	-2.17752	1443.26	23.1631	0.420931	0.516473	1443.26	23.1784	1.60598
UK039	UK039_45	502	3.57	0.2595	1.34875	1.67902	3.34899	2.8972	3.22393	0.465536	0.0936	2.5641	2.7522	1487.28	1492.56	1500.06	0.851495	1489.31	20.1757	0.182232	0.669462	1489.3	20.1977	1.35618
UK039	UK039_16	491	1.946	0.2652	1.31976	1.65583	3.59442	2.86528	3.19528	0.460604	0.0983	2.54323	2.73277	1516.39	1548.3	1592.12	4.75666	1528.12	20.3446	6.47484	0.0109412	1528.11	20.3672	1.33284
UK039	UK039_69	55.5	2.415	0.2704	2.40385	2.60355	3.80657	8.00884	8.13274	0.300149	0.1021	7.63957	7.70474	1542.83	1594.13	1662.65	7.20617	1549.15	34.76	2.44199	0.118126	1549.16	34.7717	2.24455
UK039	UK039_65	101.7	1.819	0.2874	2.01809	2.25227	3.92701	6.28632	6.44343	0.321029	0.0991	5.95358	6.03698	1628.52	1619.26	1607.25	-1.32371	1626.74	30.8576	0.128512	0.719979	1626.74	30.8715	1.89775
UK039	UK039_23	396	3.033	0.2946	2.27427	2.48441	4.34222	6.66741	6.81574	0.341102	0.1069	6.26754	6.34681	1664.48	1701.42	1747.22	4.73594	1671.46	34.816	1.72383	0.1892	1671.47	34.8291	2.08375
UK039	UK039_2	440	3.226	0.2971	1.24537	1.59717	4.3381	2.92262	3.2468	0.426115	0.1059	2.644	2.82679	1676.91	1700.64	1729.99	3.06829	1685.89	21.176	3.03535	0.0814691	1685.88	21.2001	1.25751
UK039	UK039_31	464	2.347	0.3053	0.949885	1.37923	4.54203	2.67654	3.02719	0.354893	0.1079	2.50232	2.69473	1717.54	1738.7	1764.26	2.64809	1724.85	18.6499	2.55564	0.109901	1724.85	18.676	1.08277
UK039	UK039_26	295	1.011	0.3103	1.3213	1.65706	4.51801	3.04754	3.35969	0.433563	0.1056	2.74621	2.92262	1742.18	1734.29	1724.79	-1.00867	1738.89	22.3723	0.309278	0.578124	1738.9	22.3963	1.28796
UK039	UK039_51	273	1.527	0.3084	1.39429	1.71582	4.5924	2.86253	3.19281	0.487085	0.108	2.5	2.69258	1732.83	1747.89	1765.95	1.87548	1739.94	22.784	1.26911	0.259934	1739.93	22.8101	1.31098
UK039	UK039_10	233	2.008	0.3099	1.19393	1.55739	4.72156	3.81172	4.06561	0.313227	0.1105	3.61991	3.7555	1740.21	1771.07	1807.65	3.73056	1747.72	22.1266	3.07548	0.0794813	1747.72	22.148	1.26725
UK039	UK039_80	85.9	2.4	0.3162	2.18216	2.40038	4.53416	5.01849	5.21395	0.434824	0.104	4.51923	4.62855	1771.14	1737.26	1696.7	-4.38769	1758.19	33.4407	2.49858	0.113949	1758.19	33.4564	1.90288
UK039	UK039_9	458	2.387	0.3131	1.05398	1.45288	4.69692	2.61181	2.97011	0.403542	0.1088	2.38971	2.5905	1755.94	1766.69	1779.42	1.31936	1760.31	19.688	0.688476	0.406683	1760.3	19.7152	1.11999
UK039	UK039_72	303	2.795	0.3131	1.37336	1.69886	4.74873	3.46556	3.74301	0.396289	0.11	3.18182	3.33526	1755.94	1775.88	1799.4	2.4152	1762.75	23.683	1.55003	0.21313	1762.75	23.7047	1.34476
UK039	UK039_30	702	12.1	0.3187	1.5375	1.83409	4.83366	3.1308	3.43539	0.491087	0.11	2.72727	2.90483	1783.38	1790.77	1799.4	0.890601	1786.97	24.8505	0.25993	0.610168	1786.96	24.8754	1.39205
UK039	UK039_95	101.1	2.608	0.3177	2.04596	2.27726	4.94114	4.72162	4.92886	0.433317	0.1128	4.25532	4.37124	1778.49	1809.31	1845.01	3.60551	1789.1	32.3124	2.19785	0.138203	1789.09	32.3292	1.80702
UK039	UK039_27	173.2	2.386	0.3221	1.49022	1.79465	4.80085	3.81809	4.07159	0.390305	0.1081	3.51526	3.65473	1799.98	1785.05	1767.64	-1.82942	1794.73	25.4294	0.739836	0.389714	1794.73	25.4498	1.41803
UK039	UK039_67	293.5	5.16	0.323	1.45511	1.7656	4.8009	3.30592	3.59571	0.440153	0.1078	2.96846	3.13237	1804.36	1785.06	1762.56	-2.37167	1795.97	24.4168	1.58496	0.208047	1795.98	24.4399	1.36081
UK039	UK039_46	412	3.45	0.3244	1.51048	1.81151	4.84407	2.6061	2.96509	0.579593	0.1083	2.12373	2.34739	1811.18	1792.59	1771.01	-2.268	1798.77	23.4051	2.25653	0.133052	1798.79	23.4379	1.30298
UK039	UK039_56	205	2.514	0.3192	1.28446	1.62783	5.04369	3.39382	3.67668	0.378471	0.1146	3.14136	3.29669	1785.82	1826.69	1873.6	4.68525	1798.95	23.141	6.45909	0.0110386	1798.95	23.1636	1.28762
UK039	UK039_17	185	1.962	0.3236	1.66873	1.94542	4.9169	4.16056	4.39435	0.401082	0.1102	3.81125	3.94026	1807.29	1805.16	1802.71	-0.254015	1806.55	27.7924	0.0128918	0.909601	1806.55	27.8115	1.53948
UK039	UK039_70	93.6	1.241	0.3236	2.19407	2.41121	5.07306	6.04135	6.20466	0.363175	0.1137	5.62885	5.71699	1807.29	1831.61	1859.38	2.80143	1813.36	35.5988	0.846124	0.357651	1813.36	35.6133	1.96394
UK039	UK039_29	151.5	2.338	0.3287	1.82537	2.08134	5.00799	4.0541	4.29368	0.450253	0.1105	3.61991	3.7555	1832.08	1820.67	1807.65	-1.35133	1827.25	29.3973	0.390706	0.531929	1827.25	29.417	1.60991
UK039	UK039_48	80.2	1.113	0.3292	1.97448	2.21327	4.98383	5.38421	5.56684	0.366717	0.1098	5.00911	5.10795	1834.5	1816.58	1796.09	-2.13864	1829.27	32.5662	0.577212	0.447407	1829.27	32.5821	1.78115
UK039	UK039_89	234	1.948	0.3276	1.61783	1.90194	5.20353	3.21456	3.5119	0.50328	0.1152	2.77778	2.9523	1826.74	1853.19	1883.01	2.98862	1839.92	26.2245	3.09697	0.0784382	1839.9	26.2498	1.42669
UK039	UK039_41	126	2.164	0.335	1.61194	1.89693	5.13169	5.12081	5.3125	0.314782	0.1111	4.86049	4.96229	1862.57	1841.37	1817.49	-2.48056	1857.31	28.5493	0.863437	0.352779	1857.31	28.5674	1.5381
UK039	UK039_37	154.1	3.13	0.3537	1.49845	1.80148	5.63272	3.77348	4.02978	0.397099	0.1155	3.4632	3.60469	1952.24	1921.12	1887.7	-3.41924	1939.71	26.7708	3.03297	0.0815884	1939.71	26.7927	1.38127
UK039	UK039_11	409	2.186	0.3584	1.00446	1.41737	6.24621	2.72363	3.0689	0.368796	0.1264	2.53165	2.72199	1974.59	2010.94	2048.49	3.60795	1989.11	21.11	6.33492	0.0118384	1989.1	21.1389	1.06274
UK039	UK039_79	96.2	1.123	0.362	2.09945	2.32544	6.22909	4.95403	5.15194	0.423785	0.1248	4.48718	4.59726	1991.65	2008.54	2025.96	1.69374	1998.17	35.6419	0.541334	0.461881	1998.17	35.6596	1.78462
UK039	UK039_96	161.1	2.122	0.3655	1.39535	1.71668	6.16333	3.55586	3.82676	0.392409	0.1223	3.27065	3.42011	2008.19	1999.26	1990.05	-0.911664	2004.57	26.0541	0.262552	0.608372	2004.57	26.0777	1.30091
UK039	UK039_57	229.2	1.482	0.3624	1.87638	2.12622	6.45083	3.82292	4.07611	0.490824	0.1291	3.33075	3.47763	1993.54	2039.22	2085.75	4.42101	2016.13	31.507	6.2144	0.0126715	2016.11	31.5301	1.56391
UK039	UK039_62	297	1.28	0.3731	1.63495	1.91652	6.25547	3.52685	3.79983	0.463572	0.1216	3.125	3.2811	2043.97	2012.24	1979.83	-3.23949	2027.39	28.4014	3.38122	0.0659432	2027.4	28.4259	1.40209
UK039	UK039_73	183.6	1.933	0.37	2.97297	3.13665	6.50959	5.49712	5.67612	0.540824	0.1276	4.62382	4.73072	2029.4	2047.2	2065.17	1.73201	2039.86	45.8148	0.500277	0.479379	2039.86	45.8324	2.24684
UK039	UK039_83	152.4	9.45	0.3789	1.50435	1.8064	6.34227	3.84824	4.09987	0.390921	0.1214	3.54201	3.68047	2071.14	2024.32	1976.9	-4.76707	2051.23	27.8721	6.27875	0.0122194	2051.24	27.8946	1.35989
UK039	UK039_34	68.4	1.65	0.3763	1.96652	2.20617	6.58411	5.41318	5.59486	0.363283	0.1269	5.04334	5.14153	2058.98	2057.22	2055.46	-0.170842	2058.41	35.3643	0.00482942	0.944596	2058.41	35.3816	1.71888
UK039	UK039_14	56.8	0.883	0.385	2.5974	2.78325	6.90089	5.77136	5.94211	0.45005	0.13	5.15385	5.24996	2099.6	2098.77	2097.96	-0.0779408	2099.23	43.5858	0.000940913	0.975529	2099.23	43.6018	2.07704
UK039	UK039_86	187	0.815	0.3861	1.7612	2.0253	7.01643	3.12354	3.42878	0.563848	0.1318	2.57967	2.76671	2104.72	2113.51	2122.09	0.818519	2110.82	28.9666	0.309104	0.578231	2110.81	28.9983	1.3738
UK039	UK039_18	110	2.053	0.4643	1.80918	2.06715	10.7422	4.2214	4.45199	0.428572	0.1678	3.81406	3.94298	2458.52	2501.08	2535.82	3.0484	2479.82	35.6415	3.59671	0.057894	2479.81	35.6654	1.43823
UK039	UK039_87	224	2.43	0.4979	1.42599	1.74168	12.1031	2.4906	2.86411	0.572548	0.1763	2.04197	2.27369	2604.76	2612.43	2618.37	0.519543	2611.24	26.4613	0.243049	0.622013	2611.23	26.5068	1.01511
UK039	UK039_7	196	2.5	0.5113	1.42773	1.74311	12.8729	2.75388	3.09578	0.518444	0.1826	2.35487	2.5584	2662.18	2670.4	2676.63	0.539879	2668.4	28.0419	0.235846	0.627222	2668.39	28.0816	1.05238
UK039	UK039_77	68	1.53	0.525	2.09524	2.32164	13.1889	4.61892	4.83057	0.453621	0.1822	4.11636	4.23608	2720.35	2693.26	2673	-1.77152	2703.55	40.8248	1.13051	0.287667	2703.55	40.8483	1.51091
UK039	UK039_97	205.1	1.375	0.518	2.50965	2.70155	13.4202	4.49187	4.70923	0.558711	0.1879	3.72539	3.85727	2690.69	2709.68	2723.87	1.21793	2705.85	43.4865	0.564606	0.452411	2705.84	43.5138	1.60814
UK039	UK039_81	36.1	0.3307	0.512	2.92969	3.09565	13.7659	5.38039	5.56315	0.544512	0.195	4.51282	4.62229	2665.16	2733.74	2784.8	4.29604	2715.72	51.287	5.4391	0.0196909	2715.7	51.3099	1.88938
UK039	UK039_53	81.5	2.075	0.559	2.50447	2.69674	14.7907	5.22506	5.41306	0.47932	0.1919	4.58572	4.69349	2862.5	2801.87	2758.51	-3.76947	2820.22	47.3875	4.25555	0.0391223	2820.23	47.4093	1.68105
UK039	UK039_98	153	4.61	0.558	2.15054	2.37167	16.4261	3.2844	3.57593	0.654773	0.2135	2.48244	2.67628	2858.36	2901.93	2932.3	2.52166	2903.18	34.1633	4.45843	0.0347293	2903.16	34.2062	1.17824
UK039	UK039_4	316.6	2	0.335	1.28358	1.62714	4.83145	3.49474	3.77004	0.36729	0.1046	3.25048	3.40082	1862.57	1790.39	1707.29	-9.09496	1834.7	23.2487	19.7152	8.98821e-06
UK039	UK039_5	457	0.795	0.2835	1.34039	1.67232	4.04962	2.67643	3.02709	0.500812	0.1036	2.3166	2.52322	1608.97	1644.22	1689.59	4.77206	1624.71	21.1303	8.39787	0.00375661
UK039	UK039_8	447	1.872	0.3094	1.2605	1.609	4.77366	3.04362	3.35613	0.414147	0.1119	2.77033	2.94529	1737.75	1780.28	1830.5	5.06684	1753.16	22.1002	8.6576	0.00325701
UK039	UK039_13	207	0.957	0.577	1.90641	2.15277	21.0428	2.90566	3.23154	0.656103	0.2645	2.19282	2.41007	2936.5	3140.56	3273.71	10.3006	3145.48	31.1595	117.011	2.85544e-27
UK039	UK039_19	348	8.5	0.2442	1.26945	1.61602	3.41754	3.49027	3.7659	0.363711	0.1015	3.25123	3.40154	1408.49	1508.43	1651.73	14.726	1427.53	19.5654	44.082	3.14903e-11
UK039	UK039_21	304	2.437	0.2776	1.80115	2.06013	4.0151	3.62499	3.89109	0.496871	0.1049	3.14585	3.30097	1579.26	1637.26	1712.56	7.78357	1601.09	26.3382	14.2424	0.00016071
UK039	UK039_22	499	1.18	0.2488	2.291	2.49973	3.43732	4.86466	5.06606	0.470947	0.1002	4.29142	4.40639	1432.28	1512.97	1627.8	12.011	1453.09	30.4399	17.6977	2.5894e-05
UK039	UK039_25	207	1.16	0.3079	1.20169	1.56335	4.75901	2.9336	3.25669	0.409629	0.1121	2.67618	2.85691	1730.36	1777.7	1833.74	5.63731	1747.38	21.3964	11.3129	0.000769705
UK039	UK039_32	370	1.263	0.4104	1.51072	1.81171	8.59541	2.81053	3.14628	0.537522	0.1519	2.36998	2.57232	2216.75	2296.07	2367.43	6.36453	2268.24	27.3356	27.0186	2.01511e-07
UK039	UK039_38	269	1.579	0.4939	1.45778	1.76781	12.3327	2.64643	3.0006	0.550849	0.1811	2.20872	2.42455	2587.53	2630.07	2662.97	2.83302	2621.05	27.5916	6.94999	0.00838198
UK039	UK039_39	535	1.319	0.0695	1.72662	1.9953	0.623831	7.72238	7.85081	0.223586	0.0651	7.52688	7.59302	433.143	492.246	777.57	44.2954	433.703	8.35271	14.7819	0.000120691
UK039	UK039_42	576	0.726	0.2849	1.4742	1.78137	4.22674	3.82694	4.07988	0.385217	0.1076	3.5316	3.67045	1615.99	1679.23	1759.17	8.13871	1632.33	23.8426	13.9106	0.000191717
UK039	UK039_43	234	1.359	0.5284	1.15443	1.52732	14.5129	2.35988	2.75119	0.48919	0.1992	2.05823	2.2883	2734.71	2783.85	2819.65	3.01264	2770.63	25.0983	9.95195	0.00160679
UK039	UK039_44	135.8	1.862	0.2172	2.1639	2.3838	3.04267	6.28948	6.44651	0.344051	0.1016	5.90551	5.98958	1267.06	1418.39	1653.55	23.3733	1279.24	27.0686	36.1708	1.80762e-09
UK039	UK039_47	139	1.343	0.4828	1.73985	2.00676	12.6214	3.29258	3.58345	0.528415	0.1896	2.79536	2.96884	2539.45	2651.82	2738.7	7.27518	2616.6	32.7841	35.786	2.20227e-09
UK039	UK039_60	165.9	1.423	0.4835	1.61324	1.89803	12.9197	3.30941	3.59891	0.48747	0.1938	2.88958	3.05772	2542.49	2673.81	2774.68	8.36811	2621.65	32.1914	48.0346	4.18768e-12
UK039	UK039_94	108.4	0.953	0.3391	1.76939	2.03242	5.76023	4.42738	4.64776	0.399647	0.1232	4.05844	4.17983	1882.34	1940.45	2003.08	6.02772	1900.72	30.4245	7.98132	0.00472625
UK039	UK039_99	194	1.516	0.4385	1.8244	2.08049	9.57088	3.06564	3.37611	0.595113	0.1583	2.46368	2.65889	2343.92	2394.38	2437.58	3.84237	2384.3	30.6179	9.08551	0.00257642
UK039	UK039_101	364	2.928	0.3218	2.14419	2.36591	5.6749	3.72767	3.98692	0.575209	0.1279	3.04926	3.20904	1798.51	1927.56	2069.31	13.0863	1864.78	32.5539	59.757	1.07325e-14
Sample: Chinook Formation		Lat 53.936390		Long -118.881773		Datum NAD83		Beam Diameter: 22 µm
Sample Details		U (ppm)1	U/Th	Final 206Pb/238U (2σ)			Final 207Pb/235U (2σ)			Error Correlation	Final 207Pb/206Pb (2σ)			Apparent Age (Ma)				Concordia Age (Internal + External Errors)				Accepted Ages2
Sample	Spot			206/238	Int. (%)3	I+E (%)4	207/235	Int. (%)3	I+E (%)4		207/206	Int. (%)3	I+E (%)4	206Pb/ 238U	207Pb/ 235U	207Pb/ 206Pb	Disc (%)5	Age (Ma)	± Ma	MSWD	Prob. Fit	Age (Ma)	2σ (Ma)	2σ (%)
UK042	UK042_19	364	2.074	0.01229	3.09194	3.24963	0.072696	19.3627	19.4143	0.159686	0.0429	19.1142	19.1404	78.7435	71.2546	-173.413	145.408	78.6965	2.54199	1.29806	0.254568	78.6965	2.54199	3.23012
UK042	UK042_101	250	4.82	0.0125	5.68	5.76736	0.0844515	29.1305	29.1649	0.194984	0.049	28.5714	28.5889	80.0807	82.3215	147.831	45.8295	80.0824	4.58994	0.0391704	0.843111	80.0824	4.58994	5.73152
UK042	UK042_121	292	3.4	0.01255	4.22311	4.33989	0.100363	22.8082	22.852	0.185158	0.058	22.4138	22.4361	80.399	97.1112	529.762	84.8236	80.3316	3.46656	2.53921	0.111051	80.3316	3.46656	4.31532
UK042	UK042_26	1040	2.131	0.01255	2.47012	2.66486	0.0827128	13.4094	13.4838	0.184208	0.0478	13.1799	13.2178	80.399	80.6923	89.3818	10.0499	80.4002	2.12881	0.00325195	0.954525	80.4002	2.12881	2.64776
UK042	UK042_140	320.3	1.876	0.01266	3.94945	4.07408	0.0785502	24.7614	24.8018	0.1595	0.045	24.4444	24.4649	81.0993	76.781	-55.6551	245.718	81.0832	3.28267	0.228405	0.632709	81.0832	3.28267	4.04852
UK042	UK042_28	121.6	1.709	0.01282	6.31825	6.3969	0.11136	35.4876	35.5158	0.178041	0.063	34.9206	34.935	82.1178	107.209	708.231	88.4052	81.9807	5.21607	1.94047	0.163617	81.9807	5.21607	6.36256
UK042	UK042_53	1120	14.76	0.01297	2.15883	2.37919	0.0933494	14.3397	14.4092	0.150549	0.0522	14.1762	14.2115	83.0724	90.6187	294.181	71.7614	83.0791	1.96374	1.48252	0.223381	83.0791	1.96374	2.3637
UK042	UK042_91	735	7.62	0.01302	3.149	3.30397	0.0913756	13.5345	13.6082	0.232665	0.0509	13.1631	13.201	83.3906	88.784	236.304	64.7104	83.3943	2.73744	0.914252	0.338989	83.3943	2.73744	3.28253
UK042	UK042_150	496	6.7	0.01311	4.80549	4.90844	0.089115	17.3131	17.3708	0.277563	0.0493	16.6329	16.6629	83.9633	86.6786	162.123	48.2102	83.9678	4.0945	0.153001	0.695684	83.9678	4.0945	4.87627
UK042	UK042_102	442	2.784	0.01315	3.34601	3.49224	0.077239	22.318	22.3627	0.149924	0.0426	22.0657	22.0884	84.2178	75.5458	-190.935	144.108	84.1682	2.92054	1.16976	0.27945	84.1682	2.92054	3.46989
UK042	UK042_46	396	5.63	0.01318	4.02124	4.14372	0.0890457	20.8006	20.8486	0.193324	0.049	20.4082	20.4326	84.4087	86.614	147.831	42.9019	84.4119	3.47477	0.0673002	0.795309	84.4119	3.47477	4.11644
UK042	UK042_90	769	4.39	0.01333	2.70068	2.87987	0.0895077	13.6175	13.6908	0.198324	0.0487	13.347	13.3844	85.363	87.0447	133.413	36.0159	85.3687	2.44184	0.0901079	0.76404	85.3687	2.44184	2.86035
UK042	UK042_100	120.4	1.776	0.01398	5.29328	5.38691	0.0848127	36.7469	36.7741	0.144047	0.044	36.3636	36.3774	89.4967	82.6597	-110.694	180.85	89.4725	4.78673	0.225464	0.634908	89.4725	4.78673	5.34994
UK042	UK042_125	1951	2.413	0.0179	2.84916	3.01956	0.120441	13.0205	13.097	0.218822	0.0488	12.7049	12.7442	114.37	115.472	138.233	17.2628	114.376	3.42227	0.0249045	0.874605	114.376	3.42227	2.99213
UK042	UK042_147	254.4	2.41	0.02484	3.86473	3.99201	0.203441	15.6366	15.7005	0.247159	0.0594	15.1515	15.1845	158.172	188.034	581.788	72.8127	158.01	6.23591	5.07659	0.0242511	158.01	6.23591	3.94654
UK042	UK042_58	614	2.284	0.02516	2.22576	2.44008	0.175188	11.5045	11.5911	0.193468	0.0505	11.2871	11.3313	160.185	163.911	218.073	26.5452	160.207	3.85913	0.186606	0.665756	160.207	3.85913	2.40884
UK042	UK042_33	211	2.311	0.03097	2.93833	3.10383	0.185751	19.7599	19.8105	0.148701	0.0435	19.5402	19.5658	196.616	172.997	-138.911	241.541	196.4	6.00408	2.34707	0.125519	196.4	6.00408	3.05707
UK042	UK042_71	562	1.929	0.03102	2.09542	2.32181	0.218129	12.5294	12.609	0.16724	0.051	12.3529	12.3934	196.929	200.351	240.83	18.229	196.949	4.50128	0.0913169	0.76251	196.949	4.50128	2.28551
UK042	UK042_75	413.7	0.5371	0.04448	2.20324	2.41956	0.346509	11.1924	11.2814	0.19685	0.0565	10.9735	11.0189	280.542	302.092	472.071	40.5719	280.661	6.64023	2.17592	0.140185	280.661	6.64023	2.36592
UK042	UK042_24	606	1.368	0.0581	3.27022	3.4197	0.447004	10.8966	10.988	0.300115	0.0558	10.3943	10.4423	364.06	375.179	444.419	18.0818	364.262	12.0895	0.451433	0.501655	364.262	12.0895	3.31891
UK042	UK042_37	371	38.5	0.062	1.77419	2.03661	0.470171	8.72769	8.84152	0.203283	0.055	8.54545	8.60377	387.777	391.307	412.223	5.93028	387.838	7.64888	0.0625899	0.802448	387.838	7.64888	1.97218
UK042	UK042_57	191.5	1.442	0.0624	2.40385	2.60355	0.460299	11.8355	11.9197	0.203105	0.0535	11.5888	11.6319	390.205	384.466	350.061	-11.4675	390.117	9.84144	0.0946361	0.758364	390.117	9.84144	2.52269
UK042	UK042_134	217.2	0.967	0.0648	2.62346	2.80758	0.494978	11.3191	11.4071	0.231774	0.0554	11.0108	11.0561	404.751	408.297	428.402	5.52074	404.809	10.997	0.0359109	0.8497	404.809	10.997	2.71659
UK042	UK042_40	265	1.447	0.0649	2.31125	2.51831	0.50648	10.6772	10.7704	0.216466	0.0566	10.424	10.4719	405.356	416.079	475.982	14.8379	405.506	9.8807	0.3523	0.552814	405.506	9.8807	2.43663
UK042	UK042_124	316	2.6	0.0652	2.14724	2.36868	0.481852	9.5723	9.6762	0.224318	0.0536	9.32836	9.38181	407.172	399.343	354.281	-14.9292	407.002	9.32224	0.253595	0.614555	407.002	9.32224	2.29046
UK042	UK042_15	236	1.331	0.0682	2.19941	2.41608	0.540696	9.47617	9.58111	0.2321	0.0575	9.21739	9.27148	425.302	438.884	510.762	16.7318	425.531	9.92758	0.658016	0.417261	425.531	9.92758	2.33298
UK042	UK042_21	400	1.492	0.069	2.17391	2.39288	0.536574	8.44078	8.55843	0.257549	0.0564	8.15603	8.2171	430.128	436.163	468.149	8.12162	430.273	9.93135	0.167584	0.682268	430.273	9.93135	2.30815
UK042	UK042_42	281	2.015	0.0694	1.8732	2.12341	0.525331	8.40804	8.52614	0.222787	0.0549	8.19672	8.2575	432.54	428.706	408.153	-5.97497	432.449	8.85632	0.0694126	0.792194	432.449	8.85632	2.04795
UK042	UK042_109	88.1	1.575	0.0714	3.08123	3.23944	0.487309	16.4527	16.5134	0.187278	0.0495	16.1616	16.1925	444.585	403.075	171.582	-159.109	443.74	13.8766	2.45081	0.117464	443.74	13.8766	3.12718
UK042	UK042_49	330	3.024	0.0713	2.24404	2.45677	0.593783	8.09857	8.22112	0.277091	0.0604	7.78146	7.84545	443.983	473.281	617.935	28.1505	444.536	10.524	3.72491	0.0536064	444.536	10.524	2.36741
UK042	UK042_143	99	4.5	0.073	4.24658	4.36273	0.694502	19.3132	19.3649	0.219879	0.069	18.8406	18.8671	454.204	535.501	898.74	49.4621	454.19	19.1338	3.95035	0.0468615	454.19	19.1338	4.21272
UK042	UK042_18	103.8	1.256	0.0864	2.5463	2.73562	0.729065	14.2811	14.351	0.178298	0.0612	14.0523	14.0878	534.211	556.004	646.271	17.3394	534.44	14.0096	0.507684	0.476143	534.44	14.0096	2.62136
UK042	UK042_118	132.1	1.923	0.0874	3.08924	3.24707	0.742324	13.0337	13.1102	0.237019	0.0616	12.6623	12.7018	540.142	563.761	660.251	18.1914	540.529	16.7982	0.715993	0.397461	540.529	16.7982	3.10773
UK042	UK042_62	968	1.189	0.0908	1.32159	1.65728	0.74491	4.88794	5.08841	0.270377	0.0595	4.70588	4.81096	560.267	565.267	585.44	4.29988	560.546	8.81166	0.216697	0.641568	560.546	8.81166	1.57198
UK042	UK042_38	118.5	1.297	0.097	2.78351	2.95769	0.771701	12.785	12.863	0.217716	0.0577	12.4783	12.5183	596.804	580.738	518.389	-15.1266	596.387	16.7992	0.337766	0.561122	596.387	16.7992	2.81683
UK042	UK042_22	255	1.99	0.1071	1.5873	1.87604	0.835809	7.93425	8.0593	0.200057	0.0566	7.77385	7.83791	655.884	616.83	475.982	-37.7959	654.271	11.607	4.68093	0.0304992	654.271	11.607	1.77403
UK042	UK042_79	111.3	1.35	0.1243	2.33307	2.53834	1.18598	10.522	10.6166	0.221731	0.0692	10.2601	10.3087	755.266	794.096	904.708	16.5183	756.205	18.0332	1.77422	0.182861	756.205	18.0332	2.38469
UK042	UK042_132	198	7.73	0.1621	1.72733	1.99591	1.65616	6.70408	6.85162	0.257653	0.0741	6.47773	6.55447	968.437	991.909	1044.19	7.25497	969.915	17.7387	1.19821	0.273679	969.915	17.7387	1.82889
UK042	UK042_136	349	4.16	0.1631	2.20723	2.4232	1.61465	6.51352	6.66528	0.33887	0.0718	6.12813	6.20919	973.981	975.917	980.277	0.642221	974.185	21.4956	0.00931934	0.923094	974.185	21.4956	2.20652
UK042	UK042_130	318	2.418	0.1681	1.48721	1.79215	1.62939	4.78871	4.99317	0.310566	0.0703	4.55192	4.66047	1001.63	981.622	937.128	-6.88335	999.082	16.1735	1.73175	0.188188	999.082	16.1735	1.61884
UK042	UK042_72	312	1.935	0.1682	1.66468	1.94195	1.66978	5.7996	5.96954	0.287034	0.072	5.55556	5.64484	1002.19	997.103	985.941	-1.64771	1001.7	17.6793	0.07576	0.783128	1001.7	17.6793	1.76493
UK042	UK042_159	82.5	3.118	0.1685	2.37389	2.57592	1.79822	9.1006	9.20982	0.26085	0.0774	8.78553	8.84226	1003.84	1044.81	1131.51	11.2834	1005.91	23.7472	1.88603	0.16965	1005.91	23.7472	2.36077
UK042	UK042_67	94.9	1.211	0.1698	2.76796	2.94306	1.68332	8.79201	8.90502	0.314827	0.0719	8.34492	8.40463	1011.01	1002.24	983.111	-2.83771	1010.21	27.0879	0.10352	0.747646	1010.21	27.0879	2.68142
UK042	UK042_89	165	2.34	0.1694	2.30224	2.51004	1.7541	6.29496	6.45186	0.365728	0.0751	5.85885	5.94358	1008.8	1028.68	1071.18	5.82299	1011.09	22.976	0.987751	0.320293	1011.09	22.976	2.2724
UK042	UK042_86	156.5	1.465	0.1707	2.05038	2.28124	1.64988	7.83372	7.96035	0.261738	0.0701	7.56063	7.62647	1015.97	989.506	931.284	-9.09317	1013.89	21.106	1.1797	0.277417	1013.89	21.106	2.08168
UK042	UK042_106	634	3.888	0.1726	1.33256	1.66605	1.75868	4.27266	4.50062	0.311881	0.0739	4.05954	4.18089	1026.42	1030.36	1038.74	1.18579	1026.93	15.3678	0.0763507	0.782305	1026.93	15.3678	1.49648
UK042	UK042_61	680	2.573	0.1743	1.60643	1.89225	1.82647	4.75336	4.95928	0.337956	0.076	4.47368	4.58409	1035.76	1055.01	1095.07	5.41617	1038.15	17.6682	1.47845	0.224018	1038.15	17.6682	1.7019
UK042	UK042_144	110.2	0.99	0.1742	2.69805	2.87741	1.87106	7.43852	7.57176	0.362713	0.0779	6.93196	7.00372	1035.21	1070.9	1144.32	9.53518	1038.84	27.0609	2.18569	0.139299	1038.84	27.0609	2.60491
UK042	UK042_1	58.1	2.438	0.1752	2.91096	3.07793	1.7586	11.9	11.9837	0.244619	0.0728	11.5385	11.5817	1040.7	1030.33	1008.39	-3.2039	1040.12	29.2773	0.0751786	0.783941	1040.12	29.2773	2.81481
UK042	UK042_96	239	1.446	0.1755	1.76638	2.0298	1.73983	6.23593	6.39428	0.283259	0.0719	5.98053	6.06356	1042.34	1023.4	983.111	-6.02501	1040.47	19.1348	0.896697	0.343669	1040.47	19.1348	1.83905
UK042	UK042_133	147	2.807	0.1772	1.693	1.96628	1.71026	7.47983	7.61235	0.226342	0.07	7.28571	7.35402	1051.66	1012.38	928.353	-13.2823	1048.8	18.773	2.74832	0.0973569	1048.8	18.773	1.78996
UK042	UK042_129	110.5	1.619	0.1778	3.03712	3.19751	1.9514	8.36013	8.4789	0.363286	0.0796	7.78894	7.85288	1054.94	1098.93	1187.09	11.1322	1059.21	30.6361	2.55853	0.1097	1059.21	30.6361	2.89236
UK042	UK042_112	463	1.816	0.1808	1.43805	1.75157	1.91702	4.28003	4.50762	0.335991	0.0769	4.03121	4.15339	1071.34	1087.03	1118.6	4.2244	1073.54	16.7855	1.13933	0.285795	1073.54	16.7855	1.56356
UK042	UK042_149	127.3	0.855	0.1812	2.37307	2.57516	2.04618	8.2837	8.40355	0.286475	0.0819	7.93651	7.99926	1073.53	1131.02	1243.13	13.643	1077.1	25.2041	4.06509	0.0437783	1077.1	25.2041	2.34
UK042	UK042_152	270	3.44	0.1826	1.53341	1.83067	1.87568	5.32618	5.51073	0.2879	0.0745	5.10067	5.19777	1081.16	1072.54	1055.04	-2.47566	1080.2	17.781	0.233853	0.628681	1080.2	17.781	1.64609
UK042	UK042_35	121.1	2.097	0.1854	2.26537	2.47627	1.86098	6.97172	7.11371	0.324937	0.0728	6.59341	6.66881	1096.41	1067.34	1008.39	-8.72849	1092.75	24.33	1.67087	0.196142	1092.75	24.33	2.22649
UK042	UK042_110	123.2	1.748	0.1852	1.99784	2.23414	1.91005	8.00725	8.13118	0.249504	0.0748	7.75401	7.81823	1095.32	1084.6	1063.13	-3.02763	1094.53	22.169	0.163632	0.685835	1094.53	22.169	2.02543
UK042	UK042_85	182	2.326	0.1881	1.91388	2.15938	2.01776	5.2459	5.43318	0.364832	0.0778	4.88432	4.98564	1111.07	1121.51	1141.77	2.68849	1112.61	21.4048	0.344783	0.557081	1112.61	21.4048	1.92384
UK042	UK042_78	110.7	3.43	0.193	2.84974	3.0201	1.97186	9.86717	9.968	0.28881	0.0741	9.44669	9.49947	1137.61	1105.94	1044.19	-8.94603	1134.54	30.8846	0.9612	0.326885	1134.54	30.8846	2.72221
UK042	UK042_14	66.8	1.442	0.2002	2.5974	2.78325	2.19172	9.91795	10.0183	0.261889	0.0794	9.57179	9.62388	1176.39	1178.41	1182.12	0.484706	1176.54	29.4957	0.00348007	0.952958	1176.54	29.4957	2.50698
UK042	UK042_11	476	2.462	0.2042	1.3712	1.69712	2.20736	3.47109	3.74813	0.395035	0.0784	3.18878	3.3419	1197.84	1183.38	1157.03	-3.52762	1194.34	17.5209	1.30596	0.253128	1194.34	17.5209	1.46699
UK042	UK042_87	241	1.721	0.2034	1.76991	2.03288	2.33613	5.00525	5.2012	0.353611	0.0833	4.68187	4.78748	1193.56	1223.35	1276.25	6.47953	1197.92	21.494	2.71722	0.0992708	1197.92	21.494	1.79427
UK042	UK042_153	175.7	3.056	0.2107	1.80351	2.0622	2.38802	5.99545	6.15999	0.300813	0.0822	5.71776	5.80455	1232.55	1239.02	1250.29	1.41887	1233.33	22.5356	0.0893389	0.765019	1233.33	22.5356	1.82722
UK042	UK042_81	59.3	2.068	0.2136	2.76217	2.93762	2.3826	10.5056	10.6004	0.262924	0.0809	10.136	10.1852	1247.97	1237.39	1219.02	-2.37507	1247.09	32.7634	0.0816467	0.775078	1247.09	32.7634	2.62718
UK042	UK042_139	97	2.77	0.2133	2.81294	2.9854	2.4616	8.59745	8.71299	0.327183	0.0837	8.12425	8.18557	1246.37	1260.83	1285.59	3.05029	1248.06	33.0646	0.222904	0.636836	1248.06	33.0646	2.64929
UK042	UK042_45	80.9	1.097	0.2146	3.54147	3.67995	2.57425	11.261	11.3495	0.314489	0.087	10.6897	10.7363	1253.28	1293.35	1360.49	7.8807	1256.95	41.2153	0.96323	0.326374	1256.95	41.2153	3.27898
UK042	UK042_69	155	2.325	0.2251	1.64371	1.92401	2.68779	6.00309	6.16742	0.273811	0.0866	5.77367	5.85963	1308.77	1325.1	1351.61	3.16972	1310.58	22.2178	0.518419	0.471517	1310.58	22.2178	1.69526
UK042	UK042_148	383	1.491	0.2254	1.1535	1.52662	2.66029	3.57884	3.84813	0.322312	0.0856	3.38785	3.53235	1310.35	1317.5	1329.17	1.41593	1311.77	17.1917	0.254105	0.614199	1311.77	17.1917	1.31057
UK042	UK042_25	139.7	1.529	0.2253	1.86418	2.11546	2.74298	5.96148	6.12693	0.312704	0.0883	5.66251	5.75014	1309.82	1340.19	1389.02	5.70187	1313.67	24.3979	1.81038	0.178462	1313.67	24.3979	1.85723
UK042	UK042_56	104.7	2.023	0.2316	2.24525	2.45787	2.83246	6.06767	6.2303	0.370035	0.0887	5.63698	5.72499	1342.88	1364.17	1397.69	3.92149	1346.58	28.7087	0.875508	0.349435	1346.58	28.7087	2.13197
UK042	UK042_111	232	1.079	0.2345	1.7484	2.01418	2.64806	4.84423	5.04644	0.360924	0.0819	4.5177	4.62706	1358.04	1314.1	1243.13	-9.24396	1348.1	23.32	5.96172	0.0146197	1348.1	23.32	1.72984
UK042	UK042_83	320.4	3.035	0.239	1.29707	1.6378	2.92296	3.4128	3.69421	0.380061	0.0887	3.15671	3.31131	1381.5	1387.87	1397.69	1.15857	1383.14	19.0766	0.212363	0.644922	1383.14	19.0766	1.37923
UK042	UK042_120	164	2.883	0.2407	1.57873	1.86879	2.88069	5.30928	5.4944	0.297353	0.0868	5.06912	5.16682	1390.34	1376.87	1356.06	-2.52767	1388.21	22.4752	0.434076	0.509996	1388.21	22.4752	1.619
UK042	UK042_43	199	6.8	0.2412	2.61194	2.79683	2.98312	7.18084	7.31877	0.363737	0.0897	6.68896	6.7633	1392.93	1403.33	1419.15	1.84743	1394.74	33.7342	0.147649	0.700792	1394.74	33.7342	2.41866
UK042	UK042_123	243	2.793	0.253	1.66008	1.938	3.11511	4.35978	4.58341	0.380771	0.0893	4.03135	4.15353	1453.93	1436.43	1410.6	-3.07147	1449.45	23.6506	1.03012	0.310131	1449.45	23.6506	1.63169
UK042	UK042_146	124.3	0.5714	0.2589	1.96987	2.20916	3.19489	5.6087	5.78425	0.351217	0.0895	5.2514	5.34576	1484.21	1455.93	1414.88	-4.9	1478.09	27.7527	1.67967	0.194968	1478.09	27.7527	1.8776
UK042	UK042_6	516	1.448	0.2766	1.19306	1.55672	3.7146	2.46414	2.84112	0.484169	0.0974	2.15606	2.37667	1574.22	1574.52	1574.92	0.0449399	1574.35	19.1336	0.000716175	0.97865	1574.35	19.1336	1.21533
UK042	UK042_107	175	1.658	0.2776	1.76513	2.02871	3.70889	4.96811	5.16547	0.355292	0.0969	4.64396	4.75041	1579.26	1573.29	1565.28	-0.893183	1577.86	26.7484	0.0853068	0.770231	1577.86	26.7484	1.69523
UK042	UK042_7	1320	5.58	0.2777	1.11631	1.49872	3.80595	2.04234	2.48418	0.546585	0.0994	1.71026	1.98116	1579.77	1594	1612.88	2.05299	1587.56	18.0384	2.12088	0.145303	1587.56	18.0384	1.13623
UK042	UK042_127	131	1.1	0.2849	1.7199	1.98949	4.07354	5.57566	5.75221	0.308466	0.1037	5.30376	5.39721	1615.99	1649.02	1691.37	4.45674	1621.63	27.2459	1.95383	0.162174	1621.63	27.2459	1.68016
UK042	UK042_30	209	0.731	0.2879	1.49357	1.79743	3.95369	4.19084	4.42303	0.35639	0.0996	3.91566	4.04134	1631.03	1624.75	1616.62	-0.890887	1629.36	24.0911	0.122294	0.72656	1629.36	24.0911	1.47856
UK042	UK042_3	65.9	1.042	0.2903	2.48019	2.6742	3.9226	7.65767	7.78716	0.323884	0.098	7.2449	7.31359	1643.03	1618.36	1586.41	-3.56882	1638.29	36.9491	0.635794	0.425238	1638.29	36.9491	2.25534
UK042	UK042_158	175.9	2.957	0.292	1.78082	2.04238	4.25156	4.79381	4.99806	0.371484	0.1056	4.45076	4.56171	1651.52	1684.04	1724.79	4.24804	1659.48	27.9593	2.49643	0.114105	1659.48	27.9593	1.68482
UK042	UK042_119	239.4	1.457	0.2973	1.61453	1.89913	4.24264	4.09944	4.33652	0.393842	0.1035	3.76812	3.89855	1677.91	1682.31	1687.81	0.586912	1679.26	25.8121	0.0610705	0.804812	1679.26	25.8121	1.53711
UK042	UK042_157	187.4	2.01	0.305	1.77049	2.03338	4.48289	4.31948	4.5451	0.409885	0.1066	3.93996	4.06489	1716.06	1727.81	1742.08	1.49362	1719.85	28.0939	0.38866	0.533004	1719.85	28.0939	1.63351
UK042	UK042_31	243	1.743	0.3095	1.35703	1.68568	4.41248	3.82701	4.07995	0.354592	0.1034	3.57834	3.71544	1738.25	1714.68	1686.03	-3.09707	1731.01	23.4632	1.89441	0.168705	1731.01	23.4632	1.35546
UK042	UK042_66	472	7.21	0.3078	1.1371	1.51427	4.52829	2.52038	2.89004	0.451162	0.1067	2.2493	2.46157	1729.87	1736.18	1743.79	0.798338	1732.75	20.0248	0.26184	0.608859	1732.75	20.0248	1.15567
UK042	UK042_60	167.9	2.116	0.3133	1.88318	2.13222	4.45369	3.79758	4.05236	0.495889	0.1031	3.29777	3.44605	1756.93	1722.39	1680.66	-4.53754	1739.9	28.4981	4.32618	0.0375303	1739.9	28.4981	1.63792
UK042	UK042_47	73.5	1.165	0.3116	2.72786	2.90537	4.47249	6.99034	7.13196	0.390232	0.1041	6.43612	6.51334	1748.58	1725.88	1698.47	-2.95006	1742.04	41.2595	0.607881	0.435587	1742.04	41.2595	2.36846
UK042	UK042_88	495	1.617	0.3094	1.16354	1.53422	4.61582	3.00689	3.32286	0.386959	0.1082	2.77264	2.94747	1737.75	1752.13	1769.33	1.78454	1742.88	21.0085	1.01085	0.3147	1742.88	21.0085	1.20539
UK042	UK042_8	559	10.27	0.3111	1.18933	1.55387	4.70981	2.56878	2.93234	0.462994	0.1098	2.27687	2.48679	1746.12	1768.99	1796.09	2.78235	1756.6	20.7527	3.31437	0.0686765	1756.6	20.7527	1.18141
UK042	UK042_135	315	1.46	0.3118	1.41116	1.72956	4.71181	3.16095	3.46289	0.446436	0.1096	2.82847	3.00004	1749.56	1769.34	1792.77	2.41043	1757.65	23.5862	1.81491	0.177921	1757.65	23.5862	1.34192
UK042	UK042_74	289	1.429	0.3126	1.5675	1.85931	4.77131	3.69168	3.95329	0.424604	0.1107	3.34237	3.48876	1753.49	1779.86	1810.94	3.17227	1762.94	25.8554	2.47849	0.115413	1762.94	25.8554	1.46661
UK042	UK042_99	448	2.069	0.315	1.33333	1.66667	4.69502	2.6695	3.02097	0.499469	0.1081	2.31267	2.51961	1765.26	1766.35	1767.64	0.134336	1765.83	22.0912	0.00726285	0.932085	1765.83	22.0912	1.25104
UK042	UK042_115	309	1.333	0.3181	1.60327	1.88957	4.73245	3.70165	3.9626	0.433123	0.1079	3.33642	3.48306	1780.44	1773	1764.26	-0.917538	1777.49	26.2404	0.197833	0.656476	1777.49	26.2404	1.47626
UK042	UK042_4	374	2.066	0.3186	1.06717	1.46248	4.72232	2.81479	3.15009	0.379129	0.1075	2.60465	2.79002	1782.89	1771.21	1757.47	-1.44654	1778.36	20.1401	0.721229	0.395741	1778.36	20.1401	1.13251
UK042	UK042_65	377	3.26	0.3176	1.51134	1.81222	4.7907	3.95635	4.20151	0.382002	0.1094	3.65631	3.79059	1778	1783.27	1789.45	0.639723	1779.69	25.7041	0.0867089	0.768404	1779.69	25.7041	1.4443
UK042	UK042_16	54.2	1.262	0.3174	2.74102	2.91774	4.89272	7.99779	8.12186	0.342722	0.1118	7.51342	7.57967	1777.02	1801	1828.88	2.83574	1781.94	43.0513	0.491297	0.483349	1781.94	43.0513	2.41598
UK042	UK042_44	532	2.447	0.3186	1.09856	1.48554	4.78821	2.46067	2.83812	0.446446	0.109	2.20183	2.41828	1782.89	1782.83	1782.77	-0.00666385	1782.86	19.965	1.96069e-05	0.996467	1782.86	19.965	1.11983
UK042	UK042_82	116.3	1.587	0.3212	2.27273	2.483	4.92472	5.52506	5.70318	0.411349	0.1112	5.03597	5.1343	1795.59	1806.5	1819.12	1.29366	1799.07	35.7462	0.207095	0.649054	1799.07	35.7462	1.98692
UK042	UK042_29	514	2.24	0.3221	1.17976	1.54655	4.92076	2.30961	2.70819	0.510805	0.1108	1.98556	2.22316	1799.98	1805.82	1812.58	0.695141	1803.25	20.4633	0.250508	0.616717	1803.25	20.4633	1.1348
UK042	UK042_9	112.5	4.46	0.3281	1.76775	2.031	5.3879	5.57724	5.75375	0.316959	0.1191	5.28967	5.38337	1829.17	1882.93	1942.77	5.84732	1839.9	30.682	4.54188	0.0330752	1839.9	30.682	1.66759
UK042	UK042_12	173.5	1.535	0.3298	1.97089	2.21007	5.3476	4.30427	4.53065	0.457892	0.1176	3.82653	3.95504	1837.41	1876.51	1920.07	4.3049	1852.86	31.7225	4.0341	0.0445896	1852.86	31.7225	1.71208
UK042	UK042_77	227	7.07	0.3335	1.64918	1.92867	5.19148	4.23183	4.46188	0.389708	0.1129	3.89725	4.0235	1855.32	1851.22	1846.61	-0.471747	1853.92	28.1666	0.0453061	0.831442	1853.92	28.1666	1.5193
UK042	UK042_39	161	0.875	0.3327	1.8936	2.14143	5.3304	4.23366	4.46362	0.447272	0.1162	3.78657	3.91639	1851.46	1873.75	1898.57	2.48145	1860.31	30.844	1.34516	0.246126	1860.31	30.844	1.658
UK042	UK042_145	139	1.527	0.3347	1.64326	1.92362	5.26092	5.26311	5.4498	0.312223	0.114	5	5.09902	1861.12	1862.54	1864.13	0.161556	1861.45	29.1196	0.0036354	0.951921	1861.45	29.1196	1.56435
UK042	UK042_41	95.3	1.111	0.3374	2.3118	2.51881	5.50805	5.87901	6.04672	0.393229	0.1184	5.40541	5.49713	1874.15	1901.85	1932.22	3.00524	1882.41	37.8215	1.12087	0.289732	1882.41	37.8215	2.00921
UK042	UK042_156	54.74	3.48	0.3405	2.43759	2.63474	5.37087	6.83085	6.97571	0.35685	0.1144	6.38112	6.459	1889.07	1880.22	1870.45	-0.995504	1886.72	40.1174	0.0877845	0.767013	1886.72	40.1174	2.1263
UK042	UK042_155	126	1.717	0.3446	2.00232	2.23814	5.18847	5.25029	5.43742	0.381373	0.1092	4.85348	4.95543	1908.76	1850.73	1786.11	-6.86687	1888.47	33.3471	6.26047	0.0123461	1888.47	33.3471	1.76583
UK042	UK042_20	81.9	1.005	0.339	2.0944	2.32088	5.53417	5.01871	5.21416	0.417317	0.1184	4.56081	4.66915	1881.86	1905.92	1932.22	2.60635	1890.19	34.4347	1.1314	0.287477	1890.19	34.4347	1.82175
UK042	UK042_117	258	1.99	0.3455	1.62084	1.9045	5.39257	3.64836	3.91287	0.444265	0.1132	3.26855	3.4181	1913.07	1883.67	1851.41	-3.33061	1899.59	27.4123	2.95714	0.0854989	1899.59	27.4123	1.44307
UK042	UK042_95	382	3.59	0.3415	1.20059	1.5625	5.67857	2.61377	2.97184	0.45933	0.1206	2.32172	2.52793	1893.88	1928.12	1965.12	3.62506	1910.43	22.0686	6.54071	0.0105433	1910.43	22.0686	1.15516
UK042	UK042_128	38.3	1.375	0.343	3.207	3.35929	5.76973	8.80177	8.91465	0.364358	0.122	8.19672	8.2575	1901.09	1941.88	1985.68	4.2602	1910.78	52.055	1.103	0.293609	1910.78	52.055	2.72429
UK042	UK042_5	148.5	0.701	0.3457	1.79346	2.05341	5.54345	4.42136	4.64202	0.405636	0.1163	4.04127	4.16316	1914.03	1907.36	1900.11	-0.732562	1911.56	30.5224	0.108207	0.742195	1911.56	30.5224	1.59672
UK042	UK042_84	281	1.03	0.344	1.77326	2.03579	5.63951	3.29356	3.58434	0.538402	0.1189	2.77544	2.9501	1905.88	1922.16	1939.76	1.74638	1915.35	28.2501	1.09501	0.295364	1915.35	28.2501	1.47493
UK042	UK042_50	72.4	1.048	0.3503	1.71282	1.98337	5.79109	5.92439	6.09085	0.289113	0.1199	5.67139	5.75888	1936.03	1945.08	1954.73	0.956563	1937.88	31.2964	0.113491	0.736204	1937.88	31.2964	1.61498
UK042	UK042_36	215.8	1.855	0.3504	1.45548	1.7659	5.95218	3.33735	3.62463	0.436118	0.1232	3.00325	3.16536	1936.51	1968.88	2003.08	3.32339	1950.35	25.9781	3.94303	0.0470659	1950.35	25.9781	1.33197
UK042	UK042_104	245	1.365	0.3579	1.45292	1.7638	6.12399	3.10114	3.40838	0.468511	0.1241	2.73973	2.91652	1972.21	1993.67	2015.99	2.17172	1982.87	25.7006	1.93524	0.164186	1982.87	25.7006	1.29613
UK042	UK042_114	154.7	0.4519	0.3623	1.49048	1.79486	6.25423	3.89103	4.14007	0.383054	0.1252	3.59425	3.73077	1993.07	2012.07	2031.63	1.898	1999.93	27.5748	1.01984	0.312557	1999.93	27.5748	1.37879
UK042	UK042_23	245.3	2.646	0.3687	1.19338	1.55697	6.30371	2.91661	3.24139	0.409167	0.124	2.66129	2.84297	2023.28	2018.97	2014.56	-0.432659	2021.3	23.2179	0.0818288	0.774834	2021.3	23.2179	1.14866
UK042	UK042_131	93	1.52	0.3782	2.53834	2.72822	6.60171	5.44605	5.62667	0.466088	0.1266	4.81833	4.921	2067.87	2059.58	2051.29	-0.808446	2063.9	41.8103	0.10774	0.742732	2063.9	41.8103	2.02579
UK042	UK042_32	26.06	0.67	0.398	3.51759	3.65697	6.91441	9.41218	9.51783	0.373727	0.126	8.73016	8.78724	2159.82	2100.51	2042.89	-5.72378	2139.16	60.457	1.95015	0.162571	2139.16	60.457	2.8262
UK042	UK042_113	110.1	0.996	0.467	2.78373	2.95789	10.5664	6.20488	6.36401	0.448635	0.1641	5.5454	5.63484	2470.39	2485.76	2498.35	1.11906	2478.36	51.0909	0.238349	0.625401	2478.36	51.0909	2.06148
UK042	UK042_59	76.9	0.528	0.476	2.31092	2.51801	11.446	4.58188	4.79517	0.504361	0.1744	3.95642	4.08084	2509.82	2560.19	2600.32	3.48048	2541.8	41.8927	4.2495	0.0392619	2541.8	41.8927	1.64815
UK042	UK042_103	62.7	2.78	0.494	2.42915	2.62693	11.5996	5.49819	5.67715	0.441809	0.1703	4.93247	5.03282	2587.96	2572.64	2560.59	-1.06871	2579.47	46.0808	0.28286	0.594833	2579.47	46.0808	1.78644
UK042	UK042_92	71.7	0.912	0.492	2.03252	2.2652	12.4277	4.9656	5.16306	0.40932	0.1832	4.53057	4.63962	2579.32	2637.28	2682.05	3.83032	2606.48	41.0778	4.80274	0.0284145	2606.48	41.0778	1.57599
UK042	UK042_108	60	0.874	0.4987	1.92501	2.16925	12.1982	5.00715	5.20303	0.384452	0.1774	4.62232	4.72926	2608.21	2619.77	2628.71	0.780075	2613.48	39.7159	0.190179	0.662767	2613.48	39.7159	1.51966
UK042	UK042_105	69.3	2.277	0.507	2.36686	2.56944	11.9188	5.94593	6.1118	0.398064	0.1705	5.45455	5.54545	2643.81	2598.05	2562.56	-3.17074	2621.11	46.7748	2.2019	0.137841	2621.11	46.7748	1.78454
UK042	UK042_94	74.6	0.806	0.527	2.27704	2.48695	13.508	4.26314	4.49159	0.534123	0.1859	3.60409	3.74025	2728.8	2715.85	2706.22	-0.834211	2718.82	40.8554	0.284905	0.593504	2718.82	40.8554	1.50269
UK042	UK042_68	20.7	1.632	0.539	3.52505	3.66414	12.8569	8.82691	8.93948	0.399352	0.173	8.09249	8.15404	2779.26	2669.22	2586.88	-7.43679	2721.19	68.3114	5.91333	0.0150268	2721.19	68.3114	2.51035
UK042	UK042_142	114.3	1.891	0.5432	1.71208	1.98273	14.792	3.57576	3.84526	0.478801	0.1975	3.13924	3.29467	2796.83	2801.96	2805.65	0.314299	2800.37	34.2117	0.058848	0.808326	2800.37	34.2117	1.22169
UK042	UK042_48	170	1.558	0.5569	1.47244	1.77991	15.4492	3.01779	3.33272	0.487919	0.2012	2.63419	2.81762	2853.81	2843.35	2835.96	-0.629442	2846.07	30.1478	0.307271	0.57936	2846.07	30.1478	1.05928
UK042	UK042_2	310	1.412	0.2999	1.60053	1.88725	5.01992	3.29751	3.58798	0.485376	0.1214	2.88303	3.05154	1690.81	1822.69	1976.9	14.4716	1736.72	25.7957	75.2436	4.16072e-18
UK042	UK042_10	700	2.42	0.5273	1.08098	1.47259	13.2394	1.62114	2.1513	0.666803	0.1821	1.20813	1.5683	2730.07	2696.87	2672.09	-2.16971	2695.05	20.3018	7.31739	0.00682906
UK042	UK042_13	177.2	1.407	0.274	1.35036	1.68032	3.93281	3.8921	4.14107	0.34695	0.1041	3.65034	3.78483	1561.07	1620.46	1698.47	8.08939	1573.99	22.036	12.1211	0.000498546
UK042	UK042_17	256	2.369	0.1606	1.93026	2.17392	1.78255	6.26738	6.42496	0.307985	0.0805	5.96273	6.04601	960.11	1039.11	1209.26	20.6038	964.822	19.218	14.3795	0.000149419
UK042	UK042_27	359.7	1.887	0.0661	2.118	2.34221	0.612452	8.16635	8.2879	0.259357	0.0672	7.8869	7.95005	412.616	485.105	843.978	51.1105	412.911	9.36021	20.541	5.83664e-06
UK042	UK042_34	549	1.226	0.2007	2.84006	3.01097	3.33454	4.2439	4.47333	0.66921	0.1205	3.15353	3.30828	1179.08	1489.18	1963.64	39.9543	1188.09	32.3871	423.436	4.36137e-94
UK042	UK042_51	753	2.25	0.4321	0.971997	1.39455	9.5146	1.95017	2.40897	0.498418	0.1597	1.69067	1.96427	2315.18	2388.96	2452.49	5.59878	2364.65	21.0736	34.6487	3.94893e-09
UK042	UK042_52	872	6.34	0.2501	1.03958	1.44248	3.39665	2.83693	3.16989	0.366446	0.0985	2.63959	2.82267	1438.99	1503.62	1595.92	9.83304	1455.42	17.3974	25.8427	3.70403e-07
UK042	UK042_54	601	3.18	0.2944	0.951087	1.38006	4.3961	2.58227	2.94417	0.368314	0.1083	2.40074	2.60068	1663.48	1711.61	1771.01	6.07196	1679.61	18.2836	14.2084	0.000163642
UK042	UK042_55	910	2.2	0.3012	1.09562	1.48337	4.74682	2.60392	2.96317	0.420757	0.1143	2.3622	2.56515	1697.26	1775.55	1868.88	9.18305	1725.67	19.9689	36.9911	1.1867e-09
UK042	UK042_63	139	1.484	0.258	2.17054	2.38982	3.92726	5.35127	5.53499	0.405612	0.1104	4.8913	4.99248	1479.6	1619.32	1806	18.0732	1502.59	30.602	38.5226	5.41223e-10
UK042	UK042_64	512	8	0.2974	1.14324	1.51888	4.53521	2.53306	2.9011	0.451328	0.1106	2.2604	2.47172	1678.4	1737.45	1809.29	7.23438	1702.28	20.0236	22.9331	1.67743e-06
UK042	UK042_70	178	4.93	0.3164	2.43363	2.63107	5.81524	7.24751	7.3842	0.335788	0.1333	6.82671	6.89956	1772.12	1948.68	2141.89	17.2635	1795.41	39.6444	27.6227	1.47437e-07
UK042	UK042_73	351	2.98	0.2244	1.38146	1.70541	2.77225	3.31496	3.60402	0.416735	0.0896	3.01339	3.17499	1305.08	1348.09	1417.02	7.89936	1315.63	19.0538	10.6725	0.00108739
UK042	UK042_76	288	1.589	0.2439	2.99303	3.15567	3.77317	7.40541	7.53924	0.404168	0.1122	6.77362	6.84704	1406.94	1587.05	1835.35	23.3423	1426.75	39.1919	34.6031	4.04256e-09
UK042	UK042_80	504	2.118	0.2322	1.50732	1.80887	2.89742	3.44157	3.7208	0.437975	0.0905	3.09392	3.25152	1346.02	1381.24	1436.1	6.2728	1355.63	20.6433	6.6703	0.00980324
UK042	UK042_93	285.5	1.212	0.2631	2.35652	2.55992	3.7691	4.19029	4.4225	0.562376	0.1039	3.46487	3.60629	1505.68	1586.19	1694.93	11.1653	1538.79	31.3926	23.7073	1.12158e-06
UK042	UK042_97	161	1.94	0.5053	1.95923	2.19968	15.7386	3.09076	3.39894	0.6339	0.2259	2.39044	2.59118	2636.53	2861.06	3023.23	12.7907	2838.91	32.9673	152.521	4.87527e-35
UK042	UK042_98	358	2.809	0.2266	1.41218	1.73039	2.8213	4.22943	4.45961	0.333893	0.0903	3.98671	4.11021	1316.66	1361.21	1431.88	8.04726	1323.95	19.845	7.12174	0.00761547
UK042	UK042_116	219.7	1.299	0.1715	1.63265	1.91456	1.88935	5.26575	5.45235	0.310051	0.0799	5.00626	5.10516	1020.37	1077.35	1194.52	14.5791	1025.23	17.7925	10.0736	0.00150412
UK042	UK042_122	446	2.84	0.347	1.26801	1.61488	5.8705	2.53969	2.90689	0.499279	0.1227	2.20049	2.41705	1920.26	1956.88	1995.85	3.78769	1940.19	22.6479	7.84962	0.00508314
UK042	UK042_126	348	1.761	0.1676	1.43198	1.74659	1.55059	4.13095	4.36632	0.346647	0.0671	3.87481	4.00177	998.874	950.729	840.879	-18.7893	990.296	15.5178	13.9698	0.000185772
UK042	UK042_137	123	2.83	0.3275	2.0458	2.27713	5.9741	4.76944	4.97469	0.42894	0.1323	4.30839	4.42292	1826.25	1972.08	2128.72	14.2087	1865.94	33.9226	43.2831	4.73665e-11
UK042	UK042_138	53.9	4.76	0.0211	6.63507	6.71001	0.282199	32.6403	32.6709	0.203279	0.097	31.9588	31.9744	134.604	252.4	1567.22	91.4113	133.276	8.8989	9.59313	0.00195307
UK042	UK042_141	564	2.062	0.3111	1.0929	1.48136	4.79131	2.33115	2.72658	0.468823	0.1117	2.05909	2.28907	1746.12	1783.38	1827.26	4.44061	1763.7	19.6766	9.98456	0.00157858
UK042	UK042_151	482	5.61	0.2116	1.51229	1.81301	3.06342	3.31716	3.60605	0.455898	0.105	2.95238	3.11714	1237.34	1423.59	1714.31	27.8233	1263.84	19.953	185.424	3.17182e-42
UK042	UK042_154	143	7.63	0.5353	1.71866	1.98842	16.2007	3.94733	4.19302	0.435399	0.2195	3.55353	3.69156	2763.74	2888.71	2977.03	7.16429	2831.89	36.6586	30.0503	4.20976e-08
1 Uranium concentration estimated by comparing the counts of 238U between the unknown and the 91500 reference of known concentration; approximate accuracy is 20%
2 ConcordiaAges with a probability of fit >0.01 (1%)
3 Includes only internal or analytical uncertainty of the analysis
4 Includes internal or analytical uncertainty of the analysis and additional uncertainty required to make repeat measurements of reference 91500 equivalent within the session
5 Discordance of the analysis based on the equation in text using the calculated 207Pb/206Pb and 206Pb/238Pb ages
D-Values from K-S Test, used in constructing MDS plot
D-values (no error)
			Monteith C (Raines et al. 2013) (79)			Monteith C (115)		Monteith B (134)		Monteith A (Raines et al. 2013) (99)			Cadomin (146)	Gething (132)	Bluesky (95)	Falher D (67)	Falher A (138)	Notikewin (138)	Cadotte (126)	Dunvegan (128)		Cardium (83)	Chinook (132)
Monteith C (Raines et al. 2013) (79)						0.170501		0.213395		0.557601			0.28377	0.135596	0.345139	0.129038	0.183544	0.679417	0.110508	0.352453		0.214275	0.120445
Monteith C (115)			0.170501					0.0738482		0.574967			0.346099	0.229908	0.393802	0.198443	0.115942	0.656522	0.180883	0.392867		0.266527	0.180567
Monteith B (134)			0.213395			0.0738482				0.593397			0.381926	0.262664	0.426167	0.231343	0.107398	0.687541	0.208126	0.446245		0.295361	0.204772
Monteith A (Raines et al. 2013) (99)			0.557601			0.574967		0.593397					0.313408	0.505051	0.420374	0.463893	0.554677	0.687088	0.590909	0.402383		0.454059	0.507576
Cadomin (146)			0.28377			0.346099		0.381926		0.313408				0.217206	0.113815	0.203435	0.309609	0.648898	0.335834	0.111301		0.164549	0.243151
Gething (132)			0.135596			0.229908		0.262664		0.505051			0.217206		0.226144	0.0815242	0.231555	0.679513	0.172799	0.246449		0.178624	0.113636
Bluesky (95)			0.345139			0.393802		0.426167		0.420374			0.113815	0.226144		0.241823	0.353222	0.642923	0.376055	0.0889295		0.172135	0.256286
Falher D (67)			0.129038			0.198443		0.231343		0.463893			0.203435	0.0815242	0.241823		0.211767	0.612914	0.160744	0.274604		0.157166	0.0984849
Falher A (138)			0.183544			0.115942		0.107398		0.554677			0.309609	0.231555	0.353222	0.211767		0.608696	0.199448	0.359715		0.225947	0.169631
Notikewin (138)			0.679417			0.656522		0.687541		0.687088			0.648898	0.679513	0.642923	0.612914	0.608696		0.701518	0.686141		0.52462	0.581028
Cadotte (126)			0.110508			0.180883		0.208126		0.590909			0.335834	0.172799	0.376055	0.160744	0.199448	0.701518		0.34003		0.24737	0.150072
Dunvegan (128)			0.352453			0.392867		0.446245		0.402383			0.111301	0.246449	0.0889295	0.274604	0.359715	0.686141	0.34003			0.177805	0.254025
Cardium (83)			0.214275			0.266527		0.295361		0.454059			0.164549	0.178624	0.172135	0.157166	0.225947	0.52462	0.24737	0.177805			0.123494
Chinook (132)			0.120445			0.180567		0.204772		0.507576			0.243151	0.113636	0.256286	0.0984849	0.169631	0.581028	0.150072	0.254025		0.123494
